# Supplementary material for: Validation of prescribing appropriateness criteria for older Australians using the RAND/UCLA appropriateness method
Source: PubMed Central journal article supplement — BMJ Open. 2012 Sep 15;2(5):e001431. doi: 10.1136/bmjopen-2012-001431 (PMC3467596; doi:10.1136/bmjopen-2012-001431), 2012-09-15
Supplement: bmjopen-2012-001431.draft_revisions.pdf [file bmjopen-2012-001431.draft_revisions.pdf]

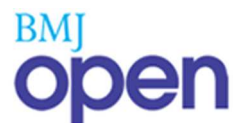

**Validation of prescribing appropriateness criteria for older Australians using the RAND/UCLA Appropriateness Method**

|                                 |                                                                                                                                                                                              |
|---------------------------------|----------------------------------------------------------------------------------------------------------------------------------------------------------------------------------------------|
| Journal:                        | <i>BMJ Open</i>                                                                                                                                                                              |
| Manuscript ID:                  | bmjopen-2012-001431                                                                                                                                                                          |
| Article Type:                   | Research                                                                                                                                                                                     |
| Date Submitted by the Author:   | 17-May-2012                                                                                                                                                                                  |
| Complete List of Authors:       | Basger, Benjamin; University of Sydney, Faculty of Pharmacy<br>Chen, Timothy; The University of Sydney, Faculty of Pharmacy<br>Moles, Rebekah; The University of Sydney, Faculty of Pharmacy |
| <b>Primary Subject Heading</b>: | Geriatric medicine                                                                                                                                                                           |
| Secondary Subject Heading:      | Research methods, Pharmacology and therapeutics, Medical education and training, Evidence based practice                                                                                     |
| Keywords:                       | drug-related problems, prescribing criteria, older patients, inappropriate drug use                                                                                                          |
|                                 |                                                                                                                                                                                              |

SCHOLARONE™  
Manuscripts

Peer Review Only

## Validation of prescribing appropriateness criteria for older Australians using the RAND/UCLA Appropriateness Method

### ARTICLE SUMMARY

#### Article focus

- Drug-related problems (DRPs) are common in older people, resulting in under-treatment with proven medicines, and disproportionately high numbers of adverse drug events
- The aim of this study was to validate a list of prescribing appropriateness criteria for use in older people

#### Key messages

- The use of medication assessment criteria is one method to assist in identifying DRPs. Criteria developed elsewhere may have little or no applicability to the Australian healthcare environment
- Validation of proposed Australian prescribing appropriateness criteria for older people was accomplished using a two-round modified Delphi method, resulting in agreement for all criteria as measured by median panel ratings, and the amount of dispersion of panel ratings, based on the interpercentile range
- Use of these criteria, together with other Australian medication review processes, may assist in improving patient care by efficiently identifying DRPs to common medical conditions and commonly used medicines, and in the medication management education of health care professionals

#### Strengths and limitations

- A validated consensus method was used involving an expert medication management panel of varied specialization. Criteria were based on established evidence-practice gaps and degree of disease burden imposed on the health care system, and were written with the aim of conciseness and clarity
- Further developmental work is required to assess the usefulness of these criteria, which only included commonly occurring medicines and medical conditions

### ABSTRACT

**Objective:** To update and validate proposed national prescribing appropriateness criteria to assist in identifying drug-related problems (DRPs) to commonly occurring medications and medical conditions in older ( $\geq 65$  years old) Australians.

**Design:** Rand/UCLA Appropriateness Method

**Participants:** A panel of medication management experts were identified consisting of geriatricians, clinical pharmacists, and disease management advisors to organisations that produce Australian evidence-based therapeutic publications. This resulted in a round one panel of fifteen members, and a round two panel of twelve members

**Main outcome measure:** Agreement on all criteria

1  
2  
3 **Results:** Forty eight prescribing criteria were rated. In the first rating round via email, there  
4 was disagreement regarding 35% (17/48) of the criteria according to median panel ratings.  
5 During a face-to-face second round meeting, discussion resulted in 81% (39/48) of the  
6 proposed criteria being accepted, with 52% (25/48) requiring amendment or updating.  
7 Twenty nine per cent (14/48) were unchanged, and 19% (9/48) deleted. Two new criteria  
8 were added, resulting in a final validated list of 41 prescribing appropriateness criteria.  
9 Agreement was reached for all criteria, measured by median panel ratings and the amount of  
10 dispersion of panel ratings, based on the interpercentile range  
11

12 **Conclusions:** A set of 41 Australian prescribing appropriateness criteria were validated by an  
13 expert panel. Use of these criteria, together with clinical judgement and other medication  
14 review processes such as patient interview, is intended to assist in improving patient care by  
15 efficiently detecting potential DRPs related to commonly occurring medicines and medical  
16 conditions in older Australians. These criteria may also contribute to the medication  
17 management education of health care professionals  
18  
19  
20  
21

## 22 INTRODUCTION

23  
24 Drug-related problems (DRPs) in older people ( $\geq 65$  years old) are common,[1-4] resulting in  
25 both undertreatment with proven medicines[5-7] and disproportionately high numbers of  
26 serious adverse medication events due to polypharmacy.[8-10] Methods to identify and  
27 reduce DRPs include educational interventions, [11] comprehensive geriatric assessment,  
28 [12] discontinuation of multiple medications, [13 ,14]electronic health record clinical  
29 decision support, [15 ,16]and the use of medication assessment criteria.[11 ,17-20]  
30  
31  
32

33 However in older patients, the importance of traditional outcomes, such as discrete clinical  
34 events or mortality, may be secondary to maintaining physical and cognitive function or relief  
35 of symptoms.[21] Because of this, optimal care requires clinical decision support tools that  
36 consider issues such as patient preferences, frailty, cost, and co-morbidities.[22] Additionally,  
37 few criteria target the oldest old,[23] where evidence may be poor, and preventive  
38 interventions may be encouraged in patients who have already exceeded an average  
39 lifespan.[24 ,25] In Australia, issues such as these are intended to be considered when  
40 patients are interviewed by an accredited pharmacist as part of the Home Medicines Review  
41 program.[26] This program aims to provide the sophistication lacking in explicit (rather than  
42 judgement based) criteria, and is targeted towards patients who may be (among other reasons)  
43 currently taking  $\geq 5$  regular medicines, attending a number of different doctors, or have  
44 recently been discharged from hospital.  
45  
46  
47  
48  
49

50 In 2008, we proposed prescribing appropriateness criteria aimed at improving detection of  
51 DRPs, to be used as part of the Australian medication review process.[27] These criteria were  
52 based on the most frequent medications prescribed to Australians, and the most frequent  
53 medical conditions for which older Australians consult medical practitioners. Australian  
54 medication and disease state resources and guidelines were used to provide content validity.  
55 However, unlike our criteria, other prescribing criteria or tools have combined evidence with  
56 expert opinion to provide face validity.[28 ,29]  
57  
58  
59  
60

1  
2  
3  
4 The aim of this study was to update our list of criteria, adding recommendations for co-  
5 morbidity and the oldest old where possible, and to validate the criteria through expert  
6 consensus. To do this, we identified a panel of medication management experts, and chose  
7 the RAND/UCLA appropriateness method,[30] which has been described as the best method  
8 for systematically combining recommendations from clinical guidelines, with the opinion of  
9 healthcare providers.[31]  
10  
11

## 12 13 **METHODS**

### 14 15 **Ethics**

16 Ethics approval was obtained from the Human Research Ethics Committee of the University  
17 of Sydney.  
18  
19

### 20 21 **Criteria development**

22 In 2008, we cross-referenced the fifty highest-volume Australian Pharmaceutical Benefits  
23 Scheme (PBS) medications, with the most common reasons for older Australians to seek or  
24 receive healthcare. Healthcare information was obtained using the BEACH (Bettering The  
25 Evaluation and Care of Health) program, which continuously collects information about the  
26 clinical activities in general practice in Australia.[32] Australian medication information  
27 sources were then used to identify both optimal and inappropriate medication management of  
28 these common conditions.[27] In Australia, medication availability and use is largely  
29 determined by the PBS.[33] In October 2011, commonly used medications and medical  
30 conditions were checked and updated using the BEACH program to ensure that criteria  
31 content was current. Changes in evidence, product information, Australian consensus  
32 documents, evidence-based publication recommendations or clinical practice guidelines  
33 relating to our criteria were noted for evaluation by an expert medication management panel.  
34 The criteria were designed to provide guidance on the process of care wherever it occurred –  
35 community, hospital, hostel or nursing home. Major considerations in their development were  
36 feasibility of data collection, conciseness and clarity of wording, and provision of a practical  
37 number of criteria. Most were explicit to enable consistent application, with additional notes  
38 provided for interpretation where necessary. They were written as a statement of the kind of  
39 medication management that should or should not occur, to simplify comprehension and  
40 facilitate uptake.[27]  
41  
42  
43  
44  
45  
46  
47

### 48 **Validation of criteria - participants**

49 To ensure comprehensive representation, we recruited three groups of medication  
50 management experts to review, update and rate the criteria; geriatricians, clinical pharmacists,  
51 and disease management advisors to organisations that produce Australian evidence-based  
52 therapeutic publications. This resulted in a round one panel of fifteen members. The  
53 geriatricians consisted of two professors of geriatric medicine; an associate professor of  
54 clinical pharmacology and aged care; a research fellow in geriatric medicine; and a hospital  
55 staff geriatrician. Clinical pharmacists consisted of a residential medication management  
56 review pharmacist; a home medicines review pharmacist; four hospital-based pharmacists  
57  
58  
59  
60

1  
2  
3 (two team leaders, one director and one education and training pharmacist), and a professor  
4 of aged care (Pharmacy). Disease management advisors to Australian evidence-based  
5 therapeutic organisations consisted of Therapeutic Guidelines,[34] Australian Medicines  
6 Handbook,[35] and the New South Wales Therapeutic Advisory Group.[36]  
7  
8

### 9 **RAND/UCLA Appropriateness Method round one**

10 In October 2011 candidate panel members were emailed an explanation of the project and an  
11 invitation to participate. After acceptance, they were emailed a rating sheet consisting of 48  
12 criteria, and asked to rate each on a nine point scale, where one meant highly inappropriate,  
13 and nine represented criteria that were highly appropriate. Appropriate was defined as “the  
14 expected health benefit exceeds the expected negative consequences by a sufficiently wide  
15 margin that criteria are worth following, exclusive of cost”. They also received a description  
16 of the way in which the criteria had been derived, and a comparison with other prescribing  
17 criteria.[23 ,27] Panel members were requested to amend the wording or delete, update or  
18 identify missing criteria as required. Upon return of the rating sheets, results were tabulated.  
19 Agreement was based on median panel ratings and the amount of dispersion of panel ratings,  
20 as per the RAND/UCLA protocol. Specifically, the median value, interpercentile range (IPR)  
21 and interpercentile range adjusted for symmetry (IPRAS) was computed for each of the  
22 criteria.[30]  
23  
24  
25  
26  
27

### 28 **Rand/UCLA Appropriateness Method round two**

29 In November 2011, a face-to-face meeting of the expert panel, chaired by a panel moderator  
30 experienced in facilitating group discussions and criteria development, met to discuss the  
31 results of round one and re-rate the criteria. One pharmacist, one staff geriatrician and a  
32 disease management advisor for a therapeutics publication could not attend, resulting in a  
33 twelve member panel. For this meeting, each panel member was provided with a copy of the  
34 results from round one. This consisted of the frequency distribution of ratings of all panellists  
35 across the 9-point scale, the overall panel median rating for each of the criteria and, for each  
36 panellist, an annotation of how they had rated each of the criteria . Scores from other panel  
37 members were not revealed. Depending upon panellists votes, panel agreement or  
38 disagreement was also stated for each of the criteria. Agreement was reached when either  
39 three or less panel members voted outside the 3-point region containing the median, or IPRS  
40 was greater than IPR. Each of the criteria was then discussed, with panellists having the  
41 opportunity of changing their ratings if, for example, misinterpretation had occurred because  
42 of the way in which the criteria had been written, or if new evidence had become available, or  
43 if criteria had been interpreted in the light of a panellists own clinical experience. Each panel  
44 member consented to audio recording of the discussion. Criteria were then re-rated, and  
45 values for the median, IPR and IPRAS computed.[30]  
46  
47  
48  
49  
50  
51

### 52 **Data analysis**

53 Median values, IPR and IPRAS were computed using SPSS version 20 (SPSS, Chicago, IL,  
54 USA). Audio recordings were transcribed.  
55  
56

### 57 **RESULTS**

1  
2  
3  
4 There was agreement on the appropriateness of 65% (31/48) of the original criteria at round  
5 one, according to median panel ratings, and for all of the criteria according to the amount of  
6 dispersion of panel ratings. Of criteria for which there was disagreement, 21% (10/48) were  
7 retained after discussion and rewording, and 15% (7/48) were deleted. Two of the criteria for  
8 which there was agreement were deleted after panel discussion, as they were addressed by  
9 other criteria. In total 52% (25/48) of the criteria were reworded. This included criteria for  
10 which agreement was reached. Twenty nine percent (14/48) of the criteria remained  
11 unchanged. Two new criteria were added, resulting in a total of 41 validated criteria.  
12  
13  
14

15  
16 Table 1 lists the median panel ratings, the amount of dispersion of panel ratings, and whether  
17 there was agreement or disagreement for the original criteria and the validated criteria. It also  
18 lists the amendments made by the panel to the original criteria, and the reasons for these  
19 amendments. There was 100% agreement for both median panel ratings and dispersion of  
20 panel ratings for the validated criteria. Table 2 contains the final list of validated criteria,  
21 arranged according to disease states. Table 3 lists usage information judged to be necessary  
22 for certain criteria.  
23  
24  
25  
26  
27  
28  
29  
30  
31  
32  
33  
34  
35  
36  
37  
38  
39  
40  
41  
42  
43  
44  
45  
46  
47  
48  
49  
50  
51  
52  
53  
54  
55  
56  
57  
58  
59  
60

1  
2  
3  
4  
5  
6  
7  
8  
9  
10  
11  
12  
13  
14  
15  
16  
17  
18  
19  
20  
21  
22  
23  
24  
25  
26  
27  
28  
29  
30  
31  
32  
33  
34  
35  
36  
37  
38  
39  
40  
41  
42  
43  
44  
45  
46  
47  
48  
49

| Criteria Number | Original prescribing appropriateness criteria for older ( $\geq 65$ years) Australians              | Rating by median method[30] (median value, A= agreement, D= disagreement), n=15 |   | Rating by IPRAS method[30] (IPR value, IPRAS value, A = agreement, D = disagreement), n=15 |   | Validated prescribing appropriateness criteria for older ( $\geq 65$ years) Australians             | Rating by median method[30] (median value, A= agreement, D= disagreement), n=12 |   | Rating by IPRAS method[30] (IPR value, IPRAS value, A = agreement, D = disagreement), n=12 |   | Amendment/reason                                                                                                                                                                                                                          |
|-----------------|-----------------------------------------------------------------------------------------------------|---------------------------------------------------------------------------------|---|--------------------------------------------------------------------------------------------|---|-----------------------------------------------------------------------------------------------------|---------------------------------------------------------------------------------|---|--------------------------------------------------------------------------------------------|---|-------------------------------------------------------------------------------------------------------------------------------------------------------------------------------------------------------------------------------------------|
|                 |                                                                                                     |                                                                                 |   |                                                                                            |   |                                                                                                     |                                                                                 |   |                                                                                            |   |                                                                                                                                                                                                                                           |
| 1.              | Patient taking an antihypertensive is at their target blood pressure                                | 7                                                                               | A | 1.00, 6.10                                                                                 | A | Patient taking an antihypertensive is at the target blood pressure appropriate for them             | 8                                                                               | A | 1.10, 7.52                                                                                 | A | “Appropriate for them” added. Current blood pressure guidelines may not be appropriate for all older patients[37-39]. For example, in the oldest old[40]; in palliative care; and for those who are/become hypotensive and/or fall[41,42] |
| 2.              | Patient at high risk of a cardiovascular event is taking a statin                                   | 7                                                                               | A | 1.00, 6.10                                                                                 | A | Patient at high risk of a recurrent cardiovascular event is taking a statin                         | 8                                                                               | A | 1.00, 6.10                                                                                 | A | “Recurrent” added to ensure use in secondary prevention of cardiovascular events rather than primary prevention, where evidence is less clear, especially in the oldest old[24,43-47]                                                     |
| 3.              | Patient with IHD or a history of MI is taking a beta blocker                                        | 8                                                                               | A | 2.00, 6.85                                                                                 | A | Patient with CHD or a history of MI is taking a beta blocker                                        | 7                                                                               | A | 1.00, 6.10                                                                                 | A | “CHD” replaced “IHD”. The term “coronary heart disease” is preferred over “ischemic heart disease”                                                                                                                                        |
| 4.              | Patient with IHD or a history of MI is taking an antiplatelet agent unless on an oral anticoagulant | 8                                                                               | A | 1.00, 7.60                                                                                 | A | Patient with CHD or a history of MI is taking an antiplatelet agent unless on an oral anticoagulant | 8                                                                               | A | 1.00, 7.60                                                                                 | A | “CHD” replaced “IHD”. The term “coronary heart disease” is preferred over “ischemic heart disease”                                                                                                                                        |
| 5               | Patient with heart failure is taking a beta blocker                                                 | 7                                                                               | A | 1.00, 6.10                                                                                 | A | Patient with stable heart failure with left systolic ventricular dysfunction (HF-                   | 8                                                                               | A | 0.10, 6.78                                                                                 | A | Description of heart failure amended. The use of beta blockers is contra-indicated in                                                                                                                                                     |



|     |                                                                                                                    |   |   |               |   |                                                                                                                        |   |   |               |   |                                                                                                                                                            |
|-----|--------------------------------------------------------------------------------------------------------------------|---|---|---------------|---|------------------------------------------------------------------------------------------------------------------------|---|---|---------------|---|------------------------------------------------------------------------------------------------------------------------------------------------------------|
|     |                                                                                                                    |   |   |               |   | LVSD) is taking a beta blocker                                                                                         |   |   |               |   | unstable heart failure. The optimal treatment of heart failure with preserved ejection fraction (HFPEF) is uncertain at this time[48 ,49]                  |
| 6.  | Patient with heart failure is taking an ACEI or A2A                                                                | 8 | A | 2.00<br>6.85  | A | Patient with stable heart failure with left systolic ventricular dysfunction (HF-LVSD) is taking an ACEI or A2A        | 9 | A | 1.00,<br>7.60 | A | Description of heart failure amended. The optimal treatment of heart failure with preserved ejection fraction (HFPEF) is uncertain at this time[48 ,49]    |
| 7.  | Patient with heart failure is NOT taking medications which may exacerbate heart failure                            | 9 | A | 1.00,<br>7.60 | A | Patient with HF-LVSD or HFPEF is NOT taking medications which may exacerbate heart failure                             | 9 | A | 0.10,<br>8.27 | A | Description of heart failure amended. The types of medicines contraindicated in HF-LVSD and HFPEF may not be identical[50 ,51]                             |
| 8   | Patient with heart failure or hypertension is NOT taking high sodium medications                                   | 8 | D | 2.20,<br>5.50 | A | Deleted                                                                                                                | - |   | -             | - | High sodium medicines (among others) in heart failure are addressed by indicator 7. In hypertension, they are addressed as lifestyle modifications[52 ,53] |
| 9.  | Patient with AF is taking an oral anticoagulant                                                                    | 7 | D | 2.0,<br>5.35  | A | Patient with AF is taking an oral anticoagulant or an antiplatelet agent, depending upon stroke risk and bleeding risk | 8 | A | 0.10,<br>6.93 | A | An antiplatelet agent may be appropriate for patients at low risk of stroke. Bleeding risk may determine choice of antithrombotic agent[39 ,54 ,55]        |
| 10. | Patient with AF taking an anticoagulant has an INR between 2 – 3                                                   | 8 | A | 2.20,<br>6.70 | A | Patient taking warfarin for AF has an INR between 2-3                                                                  | 9 | A | 1.00,<br>7.60 | A | New anticoagulants like rivaroxaban and dabigatran do not require INR monitoring                                                                           |
| 11. | Patient with a history of non-hemorrhagic stroke or TIA is taking an antiplatelet agent unless on an anticoagulant | 8 | A | 1.00,<br>7.60 | A | Patient with a history of non-hemorrhagic stroke or TIA is taking an antiplatelet agent unless on an anticoagulant     | 9 | A | 1.00,<br>7.60 | A | No change                                                                                                                                                  |
| 12. | Patient with risk factors for myopathy is NOT taking                                                               | 7 | D | 3.00,<br>4.60 | A | Patient with risk factors for statin induced myopathy is                                                               | 8 | A | 1.10,<br>7.52 | A | The use of all high dose high potency statins together with                                                                                                |



|     |                                                                                                                         |   |   |            |   |                                                                                                                                           |   |   |            |   |                                                                                                                                                                                                                                          |
|-----|-------------------------------------------------------------------------------------------------------------------------|---|---|------------|---|-------------------------------------------------------------------------------------------------------------------------------------------|---|---|------------|---|------------------------------------------------------------------------------------------------------------------------------------------------------------------------------------------------------------------------------------------|
|     | 40mg or more per day of simvastatin or atorvastatin                                                                     |   |   |            |   | not taking a high dose of a high potency statin                                                                                           |   |   |            |   | risk factors may increase the likelihood of myopathy[39 ,56 ,57]                                                                                                                                                                         |
| 13. | Patient with cardiovascular disease is NOT taking an NSAID                                                              | 7 | A | 1.20, 5.95 | A | Patient with cardiovascular disease is NOT taking an NSAID                                                                                | 8 | A | 1.10, 6.18 | A | No change                                                                                                                                                                                                                                |
| 14. | Patient with cardiovascular, respiratory disease or diabetes who smokes has been offered smoking cessation therapy      | 9 | A | 0.00, 8.35 | A | Patient with cardiovascular, respiratory disease or diabetes who smokes has been offered smoking cessation options                        | 9 | A | 0.00, 8.35 | A | “Therapy” implies pharmacotherapy, whereas repeated counselling/psychotherapy may be preferred to avoid the risks associated with polypharmacy                                                                                           |
| 15. | Patient with type 2 diabetes and hypertension and albuminuria is taking an ACEI or A2A                                  | 8 | A | 2.00, 6.85 | A | Patient with type 2 diabetes and hypertension and albuminuria is taking an ACEI or A2A                                                    | 9 | A | 1.00, 7.60 | A | No change.                                                                                                                                                                                                                               |
| 16. | Patient with diabetes at high risk of a cardiovascular event is taking an antiplatelet agent unless on an anticoagulant | 7 | D | 2.20, 5.50 | A | Patient with diabetes at high risk of a cardiovascular event is taking an antiplatelet agent unless on an anticoagulant                   | 9 | A | 1.00, 7.60 | A | No change                                                                                                                                                                                                                                |
| 17. | Patient with diabetes is NOT taking a medication which may increase or decrease blood glucose concentrations            | 5 | D | 2.20, 3.70 | A | Patient with diabetes receiving medications that may affect glycemic control is having regular monitoring of blood glucose concentrations | 9 | A | 1.00, 7.60 | A | Increased awareness and monitoring may require adjustment of hypoglycemic medication doses, depending upon the need to continue interacting medicines. For example, commencement of oral corticosteroids may worsen diabetes control[35] |
| 18. | Patient with diabetes has had an HbA1c measurement within the previous 6 months                                         | 8 | A | 1.20, 7.45 | A | Patient with diabetes has had an HbA1c measurement within the previous 6 months                                                           | 8 | A | 1.00, 7.60 | A | No change                                                                                                                                                                                                                                |
| 19. | Patient taking metformin for diabetes has had the dose adjusted for                                                     | 8 | A | 1.20, 7.45 | A | Patient taking metformin for diabetes has had the dose adjusted for renal function                                                        | 9 | A | 1.00, 7.60 | A | Creatinine clearance may represent only one of the methods used to determine                                                                                                                                                             |

|     |                                                                                                         |   |      |            |   |                                                                                                                       |   |   |            |   |                                                                                                                                                                                                                                |
|-----|---------------------------------------------------------------------------------------------------------|---|------|------------|---|-----------------------------------------------------------------------------------------------------------------------|---|---|------------|---|--------------------------------------------------------------------------------------------------------------------------------------------------------------------------------------------------------------------------------|
|     | creatinine clearance                                                                                    |   |      |            |   |                                                                                                                       |   |   |            |   | renal function                                                                                                                                                                                                                 |
| 20. | Patient taking metformin for diabetes is NOT concurrently taking glibenclamide                          | 6 | D    | 2.40, 3.85 | A | Deleted                                                                                                               | - |   | -          | - | Glibenclamide is an uncommonly used hypoglycaemic                                                                                                                                                                              |
| 21. | Patient with OA pain interfering with daily activities has been trialled on paracetamol 2 – 4 g per day | 8 | A    | 2.00, 6.85 | A | Patient with OA pain interfering with daily activities has been trialled on regular paracetamol 2 – 4 g per day       | 9 | A | 0.40, 8.05 | A | “Regular” paracetamol added to improve quality of indicator                                                                                                                                                                    |
| 22. | Patient taking analgesic(s) does NOT have pain that interferes with daily activities                    | 7 | D    | 3.2, 4.75  | A | Patient taking analgesic(s) has had the dose(s) titrated in order to avoid pain that interferes with daily activities | 8 | A | 2.00, 6.85 | A | Indicator rephrased to improve clarity                                                                                                                                                                                         |
| 23. | Patient taking an opioid is on prophylactic treatment for constipation                                  | 8 | A    | 2.00, 6.85 | A | Patient taking a regular opioid is on prophylactic treatment for constipation                                         | 9 | A | 1.00, 7.60 | A | “Regular” use added as “when required” use may not always require prophylactic treatment                                                                                                                                       |
| 24. | Patient with risk factors for impaired renal function is NOT taking an NSAID                            | 8 | A    | 1.00, 7.60 | A | Patient with risk factors for impaired renal function is NOT taking an NSAID                                          | 8 | A | 1.00, 7.60 | A | No change                                                                                                                                                                                                                      |
| 25. | Patient is NOT concurrently taking an ACEI or A2A, diuretic and NSAID (excluding low dose aspirin)      | 9 | A    | 1.00, 7.60 | A | Patient is NOT concurrently taking an ACEI or A2A, diuretic and NSAID (excluding low dose aspirin)                    | 9 | A | 1.00, 7.60 | A | No change                                                                                                                                                                                                                      |
| 26. | Patient with sleep disturbance or anxiety has NOT been taking benzodiazepines for > 4 weeks             | 8 | A    | 1.20, 7.45 | A | Patient has NOT been taking benzodiazepines for > 4 weeks                                                             | 9 | A | 1.00, 7.60 | A | “Sleep disturbance or anxiety” deleted. Benzodiazepines increase the risk of oversedation, ataxia, confusion, falls, respiratory depression and short-term memory impairment, and are recommended for short term use only[35]. |
| 27. | Patient with depression is NOT taking                                                                   | 7 | 7, D | 1.00, 4.60 | A | Deleted                                                                                                               | - |   | -          | - | The issue of anticholinergic burden is addressed by                                                                                                                                                                            |

|     |                                                                                                               |   |   |            |   |                                                                                                                 |   |   |            |   |                                                                                                 |
|-----|---------------------------------------------------------------------------------------------------------------|---|---|------------|---|-----------------------------------------------------------------------------------------------------------------|---|---|------------|---|-------------------------------------------------------------------------------------------------|
|     | anticholinergic type antidepressants                                                                          |   |   |            |   |                                                                                                                 |   |   |            |   | indicator 32                                                                                    |
| 28. | Patient with a history of falls is NOT taking psychotropic medications                                        | 8 | A | 1.00, 6.10 | A | Patient with a history of falls is NOT taking psychotropic medications                                          | 8 | A | 1.40, 6.40 | A | No change                                                                                       |
| 29. | Patient taking an SSRI is NOT concurrently taking medications known to increase the risk of GI bleeding       | 7 | D | 2.20, 5.20 | A | Deleted                                                                                                         | - |   | -          | - | Redundant indicator. This issue would be identified by indicator 47.                            |
| 30. | Patient taking an SSRI is NOT concurrently taking other medications that may contribute to serotonin toxicity | 8 | A | 2.20, 6.70 | A | Patient taking an SSRI is NOT concurrently taking other medications that may contribute to serotonin toxicity   | 8 | A | 1.40, 6.40 | A | No change. Retained by panel due to its potential significance, despite the use of indicator 47 |
| 31. | Patient with dementia is NOT receiving anticholinergic medication                                             | 8 | A | 1.20, 7.45 | A | Patient with dementia is NOT receiving anticholinergic medication                                               | 8 | A | 1.00, 7.60 | A | No change                                                                                       |
| 32. | Patient is NOT taking more than one medication with anticholinergic activity                                  | 8 | A | 0.2, 6.70  | A | Patient is not taking medication with SIGNIFICANT anticholinergic activity                                      | 8 | A | 0.40, 7.15 | A | Rewording focuses on the issue of anticholinergic burden                                        |
| 33. | Patient taking a PPI is NOT taking a medication that may cause dyspepsia                                      | 7 | D | 3.20, 4.45 | A | Patient taking a PPI is NOT taking a medication that may cause dyspepsia unless prescribed for gastroprotection | 8 | A | 0.40, 7.15 | A | “Unless prescribed for gastroprotection” added to improve the accuracy of the indicator         |
| 34. | Patient with COPD is NOT taking benzodiazepines                                                               | 7 | D | 3.00, 6.10 | A | Patient with COPD is NOT taking benzodiazepines                                                                 | 8 | A | 1.00, 6.10 | A | No change                                                                                       |
| 35. | Patient with asthma using an inhaled LABA is also using an inhaled corticosteroid                             | 9 | A | 0.20, 8.20 | A | Patient with asthma using an inhaled LABA is also using an inhaled corticosteroid                               | 9 | A | 1.00, 7.60 | A | No change                                                                                       |
| 36. | Patient using salbutamol or terbutaline inhaler more                                                          | 9 | A | 1.00, 7.60 | A | Patient using salbutamol or terbutaline inhaler more than                                                       | 9 | A | 0.40, 8.05 | A | “Except for exercise-induced asthma” added to improve the                                       |

|     |                                                                                                                                                 |   |      |            |   |                                                                                                                 |   |   |            |   |                                                                                                                          |
|-----|-------------------------------------------------------------------------------------------------------------------------------------------------|---|------|------------|---|-----------------------------------------------------------------------------------------------------------------|---|---|------------|---|--------------------------------------------------------------------------------------------------------------------------|
|     | than 3 times per week for reversible airways disease has been prescribed an ICS                                                                 |   |      |            |   | 3 times per week for reversible airways disease has been prescribed an ICS (except for exercise-induced asthma) |   |   |            |   | accuracy of the indicator                                                                                                |
| 37. | Patient with asthma is NOT taking a medication that may worsen asthma                                                                           | 7 | A    | 1.20, 6.25 | A | Patient with asthma is NOT taking a medication that may worsen asthma                                           | 8 | A | 1.00, 7.60 | A | No change                                                                                                                |
| 38. | Female patient with recurrent UTIs has been prescribed intravaginal estrogen                                                                    | 5 | D    | 2.00, 3.85 | A | Deleted                                                                                                         | - |   | -          | - | Evidence for this indicator was judged to be poor[58]                                                                    |
| 39. | Patient with a creatinine clearance < 60 ml/min is NOT receiving nitrofurantoin for UTI                                                         | 8 | A    | 2.00, 6.85 | A | Patient with a UTI is not receiving nitrofurantoin or hexamine for prophylaxis or acute treatment               | 8 | A | 1.00, 7.60 | A | Hexamine and nitrofurantoin are not recommended for the prophylactic or acute treatment of UTI in older patients[35 ,39] |
| 40. | Patient with a creatinine clearance < 50ml/min is NOT receiving hexamine for UTI prophylaxis                                                    | 8 | A    | 1.20, 6.25 | A | Deleted                                                                                                         | - | - | -          | - | Hexamine and are not recommended for the prophylactic treatment of UTI in older patients[35 ,39].                        |
| 41. | Patient with an URTI is NOT receiving antibiotics                                                                                               | 7 | 7, D | 3.00, 4.60 | A | Patient with a non-specific URTI is NOT receiving antibiotics                                                   | 8 | A | 1.00, 7.60 | A | “non-specific” added to improve the accuracy of the indicator                                                            |
| 42. | Patient with osteoporosis who is not receiving at least 600 IU Vitamin D daily from dietary sources is receiving supplementation with vitamin D | 8 | D    | 3.20, 4.75 | A | Deleted                                                                                                         | - |   | -          | - | This indicator is covered by indicator 44 and an expanded footnote                                                       |
| 43. | Patient with osteoporosis who is not receiving at least 1200 mg of calcium daily from dietary sources is receiving calcium                      | 8 | A    | 1.60, 5.95 | A | Deleted                                                                                                         | - |   | -          | - | This indicator is covered by indicator 44 and an expanded footnote                                                       |

1  
2  
3  
4  
5  
6  
7  
8  
9  
10  
11  
12  
13  
14  
15  
16  
17  
18  
19  
20  
21  
22  
23  
24  
25  
26  
27  
28  
29  
30  
31  
32  
33  
34  
35  
36  
37  
38  
39  
40  
41  
42  
43  
44  
45  
46  
47  
48  
49

|     |                                                                                                                    |   |   |            |   |                                                                                                                                                 |   |   |            |   |                                                                                                                                                                                                                                                                                                                                           |
|-----|--------------------------------------------------------------------------------------------------------------------|---|---|------------|---|-------------------------------------------------------------------------------------------------------------------------------------------------|---|---|------------|---|-------------------------------------------------------------------------------------------------------------------------------------------------------------------------------------------------------------------------------------------------------------------------------------------------------------------------------------------|
|     | supplementation                                                                                                    |   |   |            |   |                                                                                                                                                 |   |   |            |   |                                                                                                                                                                                                                                                                                                                                           |
| 44. | Patient with osteoporosis is receiving anti-osteoporotic medication                                                | 7 | A | 1.00, 6.10 | A | Patient with osteoporosis is receiving appropriate anti-osteoporotic medication                                                                 | 8 | A | 0.40, 7.15 | A | “Appropriate” added and an expanded footnote to include calcium and vitamin D                                                                                                                                                                                                                                                             |
| 45. | Patient using topical corticosteroids does NOT have itch or discomfort that interferes with daily activities       | 6 | D | 2.00, 5.35 | A | Patient using topical corticosteroids for contact or allergic dermatitis does not have itch or discomfort that interferes with daily activities | - |   | -          | - | This indicator was deleted by the panel because there was no identification of the diagnosis/condition being treated. However, contact and allergic dermatitis is one of the top 40 most frequently managed problems by general practitioners in patients ≥ 65 years old in Australia,[32] so this indicator was re-worded by the authors |
| 46. | Patient has received influenza and pneumococcal vaccination                                                        | 9 | A | 1.00, 7.60 | A | Patient has received influenza and pneumococcal vaccination                                                                                     | 9 | A | 0.00, 8.35 | A | No change                                                                                                                                                                                                                                                                                                                                 |
| 47. | Patient has no <i>significant</i> medication interactions (agreement between two medication interaction databases) | 8 | D | 3.00, 6.10 | A | Patient has no <i>clinically significant</i> medication interactions (agreement between two medication interaction databases)                   | 8 | A | 0.40, 7.15 | A | “Clinically” added to improve the accuracy of the indicator                                                                                                                                                                                                                                                                               |
| 48. | Patient has had no <i>significant</i> change in medications in the previous 90 days                                | 5 | D | 1.20, 3.25 | A | Deleted                                                                                                                                         | - |   | -          | - | It was preferred to transfer this information to the explanatory text of the article                                                                                                                                                                                                                                                      |
| New |                                                                                                                    |   |   |            |   | Patient taking thyroid hormone replacement therapy has had a serum TSH measurement within the previous 12 months                                |   |   |            |   | Thyroid disease is a common medical condition managed by GPs in older Australians[32,59]                                                                                                                                                                                                                                                  |
| New |                                                                                                                    |   |   |            |   | Patient with coronary heart disease is taking an ACEI or A2A                                                                                    |   |   |            |   | ACEIs or A2As reduce the risk of cardiovascular events[60,61]. However, a high incidence of comorbid disease                                                                                                                                                                                                                              |



1  
2  
3  
4  
5  
6  
7  
8  
9  
10  
11  
12  
13  
14  
15  
16  
17  
18  
19  
20  
21  
22  
23  
24  
25  
26  
27  
28  
29  
30  
31  
32  
33  
34  
35  
36  
37  
38  
39  
40  
41  
42  
43  
44  
45  
46  
47  
48  
49  
50  
51  
52  
53  
54  
55  
56  
57  
58  
59  
60

| Criteria No. | Validated criteria                                                                                                                                                        |
|--------------|---------------------------------------------------------------------------------------------------------------------------------------------------------------------------|
| 1            | Patient taking an antihypertensive is at the target blood pressure appropriate for them*                                                                                  |
| 2            | Patient at high risk of a recurrent cardiovascular event is taking a statin*                                                                                              |
| 3            | Patient with CHD or a history of MI is taking a beta blocker                                                                                                              |
| 4            | Patient with CHD or a history of MI is taking an antiplatelet agent unless taking an oral anticoagulant*                                                                  |
| 5            | Patient with CHD is taking an ACEI or A2A*                                                                                                                                |
| 6            | Patient with stable heart failure with HF-LVSD is taking a beta blocker                                                                                                   |
| 7            | Patient with stable heart failure with HF-LVSD is taking an ACEI or A2A*                                                                                                  |
| 8            | Patient with HF-LVSD or HFPEF is NOT taking medications which may exacerbate heart failure                                                                                |
| 9            | Patient with AF is taking an oral anticoagulant or an antiplatelet agent, depending upon stroke risk and bleeding risk*                                                   |
| 10           | Patient taking warfarin for AF has an INR between 2-3                                                                                                                     |
| 11           | Patient with a history of non-hemorrhagic stroke or TIA is taking an antiplatelet agent unless taking an anticoagulant                                                    |
| 12           | Patient with risk factors for statin induced myopathy is not taking a high dose of a high potency statin*                                                                 |
| 13           | Patient with cardiovascular disease is NOT taking an NSAID                                                                                                                |
| 14           | Patient with cardiovascular, respiratory disease or diabetes who smokes has been offered smoking cessation options*                                                       |
| 15           | Patient with type 2 diabetes and hypertension and albuminuria is taking an ACEI or A2A                                                                                    |
| 16           | Patient with diabetes at high risk of a cardiovascular event is taking an antiplatelet agent unless on an anticoagulant                                                   |
| 17           | Patient with diabetes taking medications that may affect glycemic control is receiving regular monitoring of blood glucose concentrations*                                |
| 18           | Patient with diabetes has had an HbA1c measurement within the previous 6 months*                                                                                          |
| 19           | Patient taking metformin for diabetes has had the dose adjusted for renal function*                                                                                       |
| 20           | Patient taking thyroid hormone replacement therapy has had a serum TSH measurement within the previous 12 months                                                          |
| 21           | Patient with OA pain interfering with daily activities has been trialled on regular paracetamol 2 – 4 g per day                                                           |
| 22           | Patient taking analgesic(s) has had the dose(s) titrated in order to avoid pain that interferes with daily activities                                                     |
| 23           | Patient taking a regular opioid is on prophylactic treatment for constipation                                                                                             |
| 24           | Patient with risk factors for impaired renal function is NOT taking an NSAID*                                                                                             |
| 25           | Patient is NOT concurrently taking an ACEI or A2A, diuretic and NSAID (excluding low dose aspirin)                                                                        |
| 26           | Patient has NOT been taking benzodiazepines for > 4 weeks*                                                                                                                |
| 27           | Patient with a history of falls is NOT taking psychotropic medications*                                                                                                   |
| 28           | Patient taking an SSRI is NOT concurrently taking other medications that may contribute to serotonin toxicity*                                                            |
| 29           | Patient with dementia is NOT receiving anticholinergic medication*                                                                                                        |
| 30           | Patient is not taking medication with SIGNIFICANT anticholinergic activity*                                                                                               |
| 31           | Patient taking a PPI is NOT taking a medication that may cause dyspepsia unless prescribed for gastroprotection*                                                          |
| 32           | Patient with COPD is NOT taking benzodiazepines                                                                                                                           |
| 33           | Patient with asthma using an inhaled LABA is also using an inhaled corticosteroid                                                                                         |
| 34           | Patient using salbutamol or terbutaline inhaler more than 3 times per week for reversible airways disease has been prescribed an ICS (except for exercise-induced asthma) |
| 35           | Patient with asthma is NOT taking a medication that may worsen asthma*                                                                                                    |
| 36           | Patient with a UTI is not receiving nitrofurantoin or hexamine for prophylaxis or acute treatment                                                                         |
| 37           | Patient with a non-specific URTI is NOT receiving antibiotics*                                                                                                            |
| 38           | Patient with osteoporosis is receiving appropriate anti-osteoporotic medication*                                                                                          |



|    |                                                                                                                                                 |
|----|-------------------------------------------------------------------------------------------------------------------------------------------------|
| 39 | Patient has received influenza and pneumococcal vaccination                                                                                     |
| 40 | Patient using topical corticosteroids for contact or allergic dermatitis does not have itch or discomfort that interferes with daily activities |
| 41 | Patient has no <i>clinically significant</i> medication interactions (agreement between two medication interaction databases)*                  |

a – These criteria are intended to be used by appropriately trained and qualified health professionals, as a tool to assist in making medication management decisions as part of the medication review process

b – Prior to the commencement of any medication, the contraindications and precautions for that medication should be considered

c – The intended result of using these criteria is the reasonable and appropriate medication management of individual patients, rather than the systematic application of these criteria to all patients irrespective of other considerations

A2A = angiotensin 2 receptor antagonist, ACEI = angiotensin converting enzyme inhibitor, AF = atrial fibrillation, CHD = coronary heart disease, COPD = chronic obstructive pulmonary disease, HbA1c = glycosylated haemoglobin, HF-LVSD = Heart failure with left ventricular systolic dysfunction, HFPEF = heart failure with preserved ejection fraction, ICS = inhaled corticosteroid, INR = international normalised ratio, MI = myocardial infarct, LABA = long acting beta agonist, NSAID = non-steroidal anti-inflammatory drug, PPI = proton pump inhibitor, SSRI = selective serotonin reuptake inhibitor, TIA = transient ischemic attack, TSH = thyroid stimulating hormone, UTI = urinary tract infection.

| Criteria No. | Description of issue                                                            | Details                                                                                                                                                                                                                                                                                                                                                                                                                                                                                              |
|--------------|---------------------------------------------------------------------------------|------------------------------------------------------------------------------------------------------------------------------------------------------------------------------------------------------------------------------------------------------------------------------------------------------------------------------------------------------------------------------------------------------------------------------------------------------------------------------------------------------|
| 1            | Blood pressure targets (mm Hg)                                                  | Proteinuria >1 g/day (with or without diabetes) < 125/75. CHD, diabetes, chronic kidney disease, proteinuria (> 300mg/day), stroke or TIA < 130/80. Others <140/90[35] Current blood pressure guidelines may not be appropriate for all older patients, such as the oldest old; in palliative care; and for those who are/become hypotensive and/or fall[37 ,39-42 ,63]                                                                                                                              |
| 2            | Patients at high risk of a cardiovascular event (> 15% within the next 5 years) | Age > 75 years; history of diabetes, moderate or severe chronic kidney disease (persistent proteinuria, GFR < 60ml/min, eGFR < 45 ml/min/1.73m <sup>2</sup> ), hypercholesterolemia (familial, TC > 7.5 mmol/L), SBP ≥ 180 or DBP ≥ 110 mmHg, ISH (SBP ≥160 and DBP ≤70 mmHg), coronary heart disease, stroke, TIA, PAD, heart failure, aortic disease, LVH, family history of premature CVD.[35 ,64] The benefits of statins and risks of adverse effects are uncertain towards the end of life[65] |
| 4            | Antiplatelet agents and oral anticoagulants                                     | Antiplatelet agents – aspirin, clopidogrel, dipyridamole, ticlopidine. Oral anticoagulants – dabigatran, phenindione, rivaroxaban, warfarin                                                                                                                                                                                                                                                                                                                                                          |
| 5            | Use of ACEI or A2A in CHD                                                       | A high incidence of comorbid disease in CHD (typically arthritis and/or respiratory disease) or other clinical factors (e.g. dizziness or falls, cognitive impairment, use of > 5 medicines, patient preference) may be considerations in determining medication prescribing priorities[21 ,25 ,62]                                                                                                                                                                                                  |
| 7            | Medications that may exacerbate heart failure                                   | HF-LVSD – anti-arrhythmic medicines (except for heart failure-specific beta-blockers and amiodarone), non-dihydropyridine calcium-channel blockers (e.g. verapamil or diltiazem), clozapine, corticosteroids, NSAIDs (excluding low dose aspirin), thiazolidinediones, TNF-alpha inhibitors, topical beta blockers (when added to systemic beta blockers), tricyclic antidepressants[39 ,66 ,67]. HFPEF – venodilators (e.g. isosorbide dinitrate), potent arterial                                  |

|           |                                                                     |                                                                                                                                                                                                                                                                                                                                                                                                                                                                    |
|-----------|---------------------------------------------------------------------|--------------------------------------------------------------------------------------------------------------------------------------------------------------------------------------------------------------------------------------------------------------------------------------------------------------------------------------------------------------------------------------------------------------------------------------------------------------------|
|           |                                                                     | vasodilators (e.g. hydralazine), digoxin (unless AF), excessive use of diuretics. Note: verapamil and diltiazem may improve diastolic function in HFPEF[50]                                                                                                                                                                                                                                                                                                        |
| 9         | Stroke risk and bleeding risk                                       | Stroke risk can be calculated using CHADS <sub>2</sub> or CHA <sub>2</sub> DS <sub>2</sub> -VASc.[68] Risk factors for coumarin-related bleeding complications: advanced age, uncontrolled hypertension, history of MI or IHD, cerebrovascular disease, anaemia or a history of bleeding, concomitant use of aspirin/polypharmacy[69]                                                                                                                              |
| 12        | Risk factors for statin myopathy; high dose of high potency statins | Age > 70 years, presence of disease states (diabetes, hypothyroidism, renal and hepatic disease), concurrent use of cyclosporin, fibrates, CYP3A4 inhibitors (e.g. diltiazem, macrolides, protease inhibitors, verapamil [except for pravastatin and rosuvastatin], severe intercurrent illness (infection, trauma, metabolic disorder), dose ≥ 40 mg daily. High dose of high potency statins ; ≥ 40 mg atorvastatin or simvastatin; > 10mg rosuvastatin [35 ,70] |
| 14        | Smoking cessation options                                           | Counselling (extended, brief, telephone), support services (professional, family, social, work), pharmacotherapy.                                                                                                                                                                                                                                                                                                                                                  |
| 17        | Medications that may affect glycemic control                        | Increase blood glucose: baclofen, clozapine, cyclosporin, glucocorticoids, haloperidol, olanzapine, paliperidone, phenytoin, protease inhibitors, quetiapine, risperidone, sirolimus, tacrolimus, and tricyclic antidepressants. Decrease blood glucose: excessive alcohol, disopyramide, perhexiline, quinine, trimethoprim/sulphamethoxazole[35]                                                                                                                 |
| 18        | Six monthly HbA1c measurements                                      | Treatment intensification in response to less than optimally controlled HbA1c may be inappropriate in patients with limited life expectancy or in frail older patients[71 ,72]                                                                                                                                                                                                                                                                                     |
| 19        | Metformin dose                                                      | Based on creatinine clearance: 60-90 ml/min, maximum 2g daily; 30-60 ml/min, maximum 1g daily; < 30 ml/min avoid use.[35] Based on eGFR: Review dose if eGFR< 45 ml/min/1.73m <sup>2</sup> ; avoid if eGFR<30 ml/min/1.73m <sup>2</sup> [73]                                                                                                                                                                                                                       |
| 24        | Risk factors for impaired renal function                            | Volume depletion, age > 60 years, salt-restricted diet, concomitant use of ACEIs, A2As, cyclosporin or aspirin, GFR ≤ 60 ml/min, cirrhosis, heart failure[74]                                                                                                                                                                                                                                                                                                      |
| 26        | Benzodiazepine use                                                  | Benzodiazepines increase the risk of oversedation, ataxia, confusion, falls, respiratory depression and short-term memory impairment, and are recommended for short term use only.[35]                                                                                                                                                                                                                                                                             |
| 27        | Falls and psychotropic medications                                  | Psychotropic medications = antidepressants (all), anxiolytics/hypnotics, antipsychotics.[75 ,76] Medications causing (postural) hypotension (e.g. cardiovascular medicines) or cognitive impairment (e.g. opioids) may also increase the risk of falls[39 ,77]                                                                                                                                                                                                     |
| 28        | Medications that may contribute to serotonin syndrome               | Antidepressants - desvenlafaxine, duloxetine, St John's wort, MAOIs (including moclobemide), SSRIs, TCAs, venlafaxine. Opioids - dextromethorphan, fentanyl, pethidine, tramadol. Others - selegiline, linezolid, lithium, tryptophan[35]                                                                                                                                                                                                                          |
| 29 and 30 | Medications with significant anticholinergic activity               | amantadine, amitriptyline, atropine*, belladonna alkaloids*, benzhexol, benzotropine, biperiden, brompheniramine*, chlorpheniramine, chlorpromazine, clomipramine, clozapine, cyclizine, cyclopentolate, cyproheptadine*, darifenacin, dexchlorpheniramine*, dimenhydrinate*, diphenhydramine*, disopyramide, dothiepin, doxepin, glycopyrrolate,                                                                                                                  |

|    |                                                |                                                                                                                                                                                                                                                                                                                                                                                                                                                                                                                                                                                                                                                                                                                                                                                                                                                                                                                                                                                                                                                          |
|----|------------------------------------------------|----------------------------------------------------------------------------------------------------------------------------------------------------------------------------------------------------------------------------------------------------------------------------------------------------------------------------------------------------------------------------------------------------------------------------------------------------------------------------------------------------------------------------------------------------------------------------------------------------------------------------------------------------------------------------------------------------------------------------------------------------------------------------------------------------------------------------------------------------------------------------------------------------------------------------------------------------------------------------------------------------------------------------------------------------------|
|    |                                                | homatropine, hyoscine* (butylbromide or hydrobromide), imipramine, ipratropium (nebulised), mianserin, nortriptyline, olanzapine, orphenadrine, oxybutynin, pericyazine, pheniramine*, pimozone, pizotifen, prochlorperazine, promethazine*, propantheline, solifenacin, tiotropium, tolterodine, trimeprazine*, trimipramine, triprolidine*, tropicamide (* available over-the-counter in Australia)[35]                                                                                                                                                                                                                                                                                                                                                                                                                                                                                                                                                                                                                                                |
| 31 | Medications that may cause dyspepsia           | Drugs with anticholinergic effects, aspirin, benzodiazepines, bisphosphonates, calcium channel antagonists, oral corticosteroids, dopaminergic drugs, doxycycline, erythromycin, ferrous sulphate, nitrates, NSAIDs, potassium chloride (slow release)[34 ,35 ,39 ,78]                                                                                                                                                                                                                                                                                                                                                                                                                                                                                                                                                                                                                                                                                                                                                                                   |
| 35 | Medications that may worsen asthma             | Aspirin, beta blockers (including eye drops), carbamazepine, echinacea, NSAIDs, royal jelly[35 ,79]                                                                                                                                                                                                                                                                                                                                                                                                                                                                                                                                                                                                                                                                                                                                                                                                                                                                                                                                                      |
| 38 | Non-specific URTI                              | Acute bronchitis, pharyngitis, tonsillitis, nonsuppurative otitis media and sinusitis[34]                                                                                                                                                                                                                                                                                                                                                                                                                                                                                                                                                                                                                                                                                                                                                                                                                                                                                                                                                                |
| 39 | Appropriate anti-osteoporotic medication       | Recommended daily intake (RDI) of calcium from dietary sources and/or supplements = 1300-1500 mg daily. RDI for Vitamin D from sunlight and/or dietary sources and/or supplements = 600 iu daily. Anti-osteoporotic medication = bisphosphonates, calcitriol, denosumab, HRT, raloxifene, strontium, teriparatide.[35] Evidence for fracture risk reduction in women $\geq 75$ years is either absent or lacking in NVF for alendronate, risedronate and teriparatide, and in HF for alendronate, risedronate, zoledronic acid and teriparatide. There is no data available for denosumab in VF, NVF or HF.[80] The optimal duration of bisphosphonate therapy is uncertain. Evidence supports the use of strontium for 5 years, raloxifene for 4 years, zoledronic acid and denosumab for 3 years. Exposure to teriparatide should be limited to 18 months.[81] Data are limited for non-ambulatory patients and those with significant comorbidities.[82] It should be noted that bone strength is only one of many determinants of fracture risk.[83] |
| 42 | Clinically significant medication interactions | Medication interactions that may interfere with the outcome of therapy                                                                                                                                                                                                                                                                                                                                                                                                                                                                                                                                                                                                                                                                                                                                                                                                                                                                                                                                                                                   |

A2A = angiotensin 2 receptor antagonist, ACE = angiotensin converting enzyme, ACEI = angiotensin converting enzyme inhibitor, AF = atrial fibrillation, CHADS<sub>2</sub> = Cardiac failure, Hypertension, Age, Diabetes, Stroke [doubled], CHA<sub>2</sub>DS<sub>2</sub>-VASc = Cardiac failure or dysfunction, Hypertension, Age over 75 years [doubled], Diabetes, Stroke [doubled], Vascular disease, Age 65-74 years, Sex category [female], CHD = coronary heart disease, CVD = cardiovascular disease, DBP = diastolic blood pressure, GFR = glomerular filtration rate, HF = hip fracture, HF-LVSD = Heart failure with left ventricular systolic dysfunction, HFPEF = heart failure with preserved ejection fraction, HRT = hormone replacement therapy, IHD = ischemic heart disease, ISH = isolated systolic hypertension, LVH = left ventricular hypertrophy, MAOI = monoamine oxidase inhibitor, MI = myocardial infarct, NSAID = non-steroidal anti-inflammatory drug, NVF = non-vertebral fracture, PAD = peripheral arterial disease, SBP = systolic blood pressure, SSRI = selective serotonin reuptake inhibitor, TC = total cholesterol, TCA = tricyclic antidepressant, TIA = transient ischemic attack, TNF = tumour necrosis factor, URTI = upper respiratory tract infection, VF = vertebral fracture

## DISCUSSION

This study identified a panel of medication management experts to discuss and validate a set of 41 prescribing appropriateness criteria for commonly used medicines and medical conditions in older ( $\geq 65$  years) Australians. Panel discussion resulted in retention of 81%

1  
2  
3 (39/48) of the originally proposed criteria, with a little over half (25/48) being reworded.  
4 These criteria do not simply represent a list of medications to avoid in the elderly, but also  
5 address issues such as the need for additional therapy (e.g. criteria 23 and 34, table 2),  
6 additional tests (e.g. criteria 18-20, table 2), ineffective treatment (e.g. criteria 22 and 37,  
7 table 2) and medication monitoring (e.g. criteria 10 and 20, table 2). Due to its currency and  
8 the nature of its development, we expect these criteria to make a significant contribution to  
9 the detection of DRPs in the Australian healthcare environment.  
10  
11

### 12 13 **Prescribing appropriateness lists in Australia**

14 Despite a desire in Australia to develop decision support tools to improve healthcare  
15 quality,[84] progress has consisted of the development of a limited number of non-age  
16 specific structure and process indicator lists for use in hospitals and general practice.[36 ,85  
17 ,86] These lists, like many others, [23 ,87 ,88], require updating. Currently, there is no  
18 Australian prescribing appropriateness criteria list to assist in improving medication  
19 management in older people. The usefulness of such an approach has been acknowledged,  
20 together with other approaches such as medication review.[89]  
21  
22  
23

### 24 25 **Co-morbidity**

26 Over 80% of older Australians have three or more chronic conditions.[90] Co-morbidity is  
27 associated with poor quality of life, physical disability, high health care use, multiple  
28 medicines with consequent increased risk of adverse drug events, and increased  
29 mortality.[91] Yet most Australian guidelines for chronic diseases do not modify or discuss  
30 the applicability of their recommendations to older patients with multiple comorbid  
31 conditions. [25] This situation is not restricted to Australia. [92]Because the risk of harm in  
32 older patients increases in proportion to the number of treatments prescribed, prioritization of  
33 therapeutic goals is necessary. This may run counter to recommendations of disease-specific,  
34 evidence-based guidelines.[25] Addition of our criteria with its associated usage information  
35 to the implicit processes of the Australian medication review process, may assist in  
36 addressing this problem.  
37  
38  
39  
40

### 41 42 **The RAND/UCLA appropriateness method**

43 We chose the RAND/UCLA appropriateness method, a two-round modified Delphi  
44 method[30] to select the most appropriate criteria. Unlike the Delphi method, which generally  
45 involves multiple questionnaire-driven rounds to obtain convergence of opinion, the RAND  
46 method involves an initial individual rating round, and a second face-to-face round. This  
47 method has been shown to produce results that have face, construct and predictive  
48 validity.[93 ,94] Systematically combining available evidence with expert opinion can create  
49 quality criteria where best evidence may be lacking.[95]  
50  
51

52  
53 While most lists of prescribing criteria are based on expert consensus, this has often been  
54 achieved through mail surveys rather than face-to-face meetings.[23 ,28 ,29] Although face-  
55 to-face meetings restrict panel size, they allow discussion to resolve misinterpretations,  
56 introduce new evidence, and improve clarity of criteria between rating rounds. We ensured  
57 our panel comprised different specialities, as less disagreement has been found among same-  
58  
59  
60

1  
2  
3 speciality panels.[96] We addressed concern regarding potential intimidation due to dominant  
4 panel personalities by choosing a moderator experienced in the development of these criteria  
5 and in facilitating small group discussion. Diversity of medication and disease management  
6 issues may have minimized professional, but not personal, conflict-of-interest issues. We  
7 used both the median panel rating and the amount of dispersion of panel ratings to identify  
8 agreement or disagreement. While it has been acknowledged that discrepancies between the  
9 two methods may occur,[30] discussion and second round rating resulted in agreement for all  
10 criteria for both methods.  
11  
12

### 13 14 **The nature of decision support tools**

15 Panel members emphasized that criteria may not provide definitive answers, instead  
16 indicating potential problems that might need addressing, due to a perceived unacceptable  
17 variation in care.[97] While performance indicators are designed to measure the result of  
18 statements made in clinical practice guidelines, these guidelines often provide  
19 recommendations for care independent of other considerations such as multiple co-  
20 morbidities, advanced age, frailty, patient preferences, disease burden or limited life  
21 expectancy.[98-100] In such cases, less stringent goals, deprescribing or non-prescription  
22 may be more appropriate.[13 ,71 ,101] For example, a frail older patient with multiple co-  
23 morbidities and one or more functional impairments may have a life expectancy of  
24 approximately two years or less.[65] This raises the question of whether failure to intensify  
25 treatment[71] or to underuse evidence-based therapies[102] reflects appropriate clinical  
26 judgement or an inappropriate care gap. The panel felt strongly that use of indicators,  
27 guidelines or criteria providing clinical decision support should never replace critical thinking  
28 in patient care.[103]  
29  
30  
31  
32  
33  
34  
35  
36

### 37 **Strengths and weaknesses**

38 We have followed a recommended approach [84] by suggesting criteria for which high  
39 quality evidence exists linking best practice with improved outcomes; where there are  
40 established evidence-practice gaps[104 ,105]; and where the health conditions impose the  
41 greatest burden on the healthcare system. We used a validated consensus method, an expert  
42 panel of varied specialization, and criteria written with the aim of conciseness and clarity.  
43  
44

45 In addition to face and content validity, these validated criteria, much like performance  
46 indicators, will require further developmental work to provide evidence of their acceptability,  
47 operational feasibility, reliability, and degree of predictive validity.[28 ,97] Some of this  
48 work has already commenced with the original criteria.[106] Further, these criteria only  
49 cover commonly occurring medicines and medical conditions. In addition, judgements made  
50 by an expert panel may not be representative of all health care professionals.  
51  
52  
53

### 54 **Intended use**

55 These validated criteria are intended for use by health care providers to enhance the quality of  
56 the Australian medication review process, for quality improvement, educational purposes and  
57 internal audit. They are also intended for external quality assessment, such as use by policy  
58  
59  
60



1  
2  
3 makers and for public reporting. Stakeholder involvement will be critical to facilitate local  
4 uptake and encourage further research into the effects on health outcomes.[89]  
5  
6

## 7 CONCLUSION

8  
9 This study validated 41 prescribing appropriateness criteria to assist in identifying DRPs in  
10 older ( $\geq 65$  years) Australians. These criteria are intended to represent an addition to the  
11 medication management skill set that includes consideration of limited life expectancy,  
12 evidence base in the oldest old, drug burden and care coordination, patient and care-giver  
13 education, empowerment for self management, and shared decision making. These skills are  
14 far from a “do everything for everyone” philosophy, where aggressive treatment may  
15 encourage more care, not more appropriate care.[22 ,99] Despite the presence of clinical  
16 decision support tools, health care providers need to know how to think about clinical  
17 problems, not just what to think.[103]  
18  
19  
20  
21

22 **Competing interests** None declared  
23

24 **Contributors** BJB designed and organised the study, analysed and interpreted the data and  
25 drafted the manuscript. TFC and RJM made substantial contributions to the conception,  
26 design, analysis and interpretation of the data, and to critically revising the draft. All authors  
27 take responsibility for the accuracy and integrity of the study. All authors have given final  
28 approval of the version to be published.  
29  
30  
31

32 **Funding** This research received no specific grant from any funding agency in the public,  
33 commercial or not-for-profit sectors  
34  
35

36 **Data sharing statement** No additional data are available  
37  
38

## 39 REFERENCES

- 40  
41  
42  
43 1 Kwint H-F, Faber A, Gussekloo J, *et al.* Effects of Medication Review on Drug-  
44 Related Problems in Patients Using Automated Drug-Dispensing Systems. *Drugs*  
45 *& Aging* 2011;28(4):305-14.  
46 2 Ellitt GR, Engblom E, Aslani P, *et al.* Drug related problems after discharge  
47 from an Australian teaching hospital. *Pharm World Sci* 2010;32(5):622-30.  
48 3 Nishtala PS, McLachlan AJ, Bell JS, *et al.* A retrospective study of drug-related  
49 problems in Australian aged care homes: medication reviews involving  
50 pharmacists and general practitioners *Journal of Evaluation in Clinical Practice*  
51 2011;17(1):97-103.  
52 4 Stafford AC, Tenni PC, Peterson GM, *et al.* Drug-related problems identified in  
53 medication reviews by Australian pharmacists. *Pharm World Sci* 2009;31:216-23.  
54 5 Castelino RL, Chen TF, Guddattu V, *et al.* Use of evidence-based therapy for  
55 the prevention of cardiovascular events among older people *Eval Health Prof*  
56 2010;33(3):276-301.  
57  
58  
59  
60

- 1  
2  
3 6 Heeley EL, Peiris DP, Patel AA, *et al.* Cardiovascular risk perception and  
4 evidence-practice gaps in Australian general practice (the AusHEART study).  
5 *Med J Aust* 2010;192(5):254-59.  
6  
7 7 National Institute of Clinical Studies, Australian Government. Evidence-  
8 practice gaps report, vol. 1. A review of developments 2004-2007. 2008.  
9 [http://www.nhmrc.gov.au/nics/materials-and-resources/evidence-practice-gaps-](http://www.nhmrc.gov.au/nics/materials-and-resources/evidence-practice-gaps-report-volume-one-review-developments-2004-2007)  
10 [report-volume-one-review-developments-2004-2007](http://www.nhmrc.gov.au/nics/materials-and-resources/evidence-practice-gaps-report-volume-one-review-developments-2004-2007) (accessed 7 Feb 2012)  
11  
12 8 Hilmer SN, Gnjjidic D. The effects of polypharmacy in older adults. *Clin*  
13 *Pharmacol Ther* 2009;85:86-88.  
14 9 Pirmohamed M, James S, Meakin S, *et al.* Adverse drug reactions as cause of  
15 admission to hospital: prospective analysis of 18 820 patients. *BMJ*  
16 2004;329(7456):15-19.  
17 10 Kongkaew C, Noyce PR, Ashcroft DM. Hospital admissions associated with  
18 adverse drug reactions: A systematic review of prospective observational studies.  
19 *Ann Pharmacother* 2008;42:1017-25.  
20 11 Kaur S, Mitchell G, Vitetta L, *et al.* Interventions that can reduce inappropriate  
21 prescribing in the elderly. *Drugs Aging* 2009;26(12):1013-28.  
22 12 Tulner LR, van Campen JPCM, Frankfort SV, *et al.* Changes in under-  
23 treatment after comprehensive geriatric assessment. An observational study.  
24 *Drugs & Aging* 2010;27(10):831-43.  
25 13 Le Couteur DG, Banks E, Gnjjidic D, *et al.* Deprescribing. *Aust Presc*  
26 2011;34:182-5.  
27 14 Garfinkel D, Mangin D. Feasibility study of a systemic approach for  
28 discontinuation of multiple medications in older adults. *Arch Intern Med*  
29 2010;170(18):1648-54.  
30 15 Gill JM, Mainous AG, Koopman RJ, *et al.* Impact of EHR-based clinical  
31 decision support on adherence to guidelines for patients on NSAID's: a  
32 randomised controlled trial. *Ann Fam Med* 2011;9:22-30.  
33 16 O'Connor PJ, Sperl-Hillen JM, Rush WA, *et al.* Impact of electronic health  
34 record clinical decision support on diabetes care; a randomised trial. *Ann Fam*  
35 *Med* 2011;9:12-21.  
36 17 Chang C-B, Chan D-C. Comparison of published explicit criteria for potentially  
37 inappropriate medications in older adults. *Drugs & Aging* 2010;27(12):947-57.  
38 18 Scott I, Jayathissa S. Quality of drug prescribing in older patients: is there a  
39 problem and can we improve it? *Intern Med J* 2010;40:7-18.  
40 19 The American Geriatrics Society 2012 Beers criteria update expert panel.  
41 American Geriatrics Society updated Beers criteria for potentially inappropriate  
42 medication use in older adults. *J Am Geriatr Soc* 2012;60:616-31.  
43 20 Gallagher P, Ryan C, Byrne S, *et al.* STOPP (screening tool of older person's  
44 prescriptions) and START (screening tool to alert doctors to right treatment).  
45 Consensus validation. *International Journal of Clinical Pharmacology and*  
46 *Therapeutics* 2008;46(2):72-83.  
47 21 Fried TR, Tinetti ME, Iannone MA. Primary care clinicians experiences with  
48 treatment decision making for older persons with multiple conditions. *Arch*  
49 *Intern Med* 2011;171(1):75-80.  
50 22 Hayward RA. Performance measurement in search of a path. *N Eng J Med*  
51 2007;356(9):951-52.  
52  
53  
54  
55  
56  
57  
58  
59  
60



- 1  
2  
3 23 Dimitrow MS, Airaksinen MSA, Kivela S-L, *et al.* Comparison of prescribing  
4 criteria to evaluate the appropriateness of drug treatment in individuals aged 65  
5 and older: A systematic review. *J Am Geriatr Soc* 2011;59(8):1521-30.
- 6 24 Mangin D, Sweeney K, Heath I. Preventative health care in elderly people needs  
7 rethinking. *BMJ* 2007;335:285-87.
- 8 25 Scott IA, Guyatt GH. Cautionary tales in the interpretation of clinical studies  
9 involving older persons. *Arch Intern Med* 2010;170(7):587-95.
- 10 26 Medicare Australia [homepage on the internet]. Australian Government. Home  
11 Medicines Review. [http://www.medicareaustralia.gov.au/provider/pbs/fourth-](http://www.medicareaustralia.gov.au/provider/pbs/fourth-agreement/hmr.jsp)  
12 [agreement/hmr.jsp](http://www.medicareaustralia.gov.au/provider/pbs/fourth-agreement/hmr.jsp). (accessed 8 Feb 2012).
- 13 27 Basger BJ, Chen TF, Moles RJ. Inappropriate Medication Use and Prescribing  
14 Indicators in Elderly Australians. *Drugs Aging* 2008;25(9):777-93.
- 15 28 Martirosyan L, Voorham J, Haaijer-Ruskamp FM, *et al.* A systematic literature  
16 review : prescribing indicators related to type 2 diabetes mellitus and  
17 cardiovascular risk management. *Pharmacoepidemiol Drug Saf* 2010;19:319-34.
- 18 29 Levy HB, Marcus E-L, Christen C. Beyond the Beers criteria: a comparative  
19 overview of explicit criteria *Ann Pharmacother* 2010;44:1968-75.
- 20 30 Fitch K, Bernstein SJ, Aguilar MS, *et al.* The RAND/UCLA Appropriateness  
21 Method User's Manual 2001. Rand Corporation.  
22 [www.rand.org/pubs/monograph\\_reports/MR1269.html](http://www.rand.org/pubs/monograph_reports/MR1269.html) (accessed 8 Feb 2012)
- 23  
24  
25  
26 31 Martirosyan L, Braspenning J, Denig P, *et al.* Prescribing quality indicators of  
27 type 2 diabetes mellitus ambulatory care. *Qual Saf Health Care* 2008;17:318-23.
- 28 32 Bettering the evaluation and care of health (BEACH). Family Medicine  
29 Research Centre. The University of Sydney.  
30 <http://sydney.edu.au/medicine/fmrc/beach/> (accessed 9 Feb 2012)
- 31 33 Access to Pharmaceutical Services. *Pharmaceutical Benefits Scheme. Department*  
32 *of Health and Ageing. Australian Government.*  
33 [http://www.health.gov.au/internet/budget/publishing.nsf/Content/2010-](http://www.health.gov.au/internet/budget/publishing.nsf/Content/2010-11_Health_PBS_sup1/$File/Outcome%202%20-%20Access%20to%20Pharmaceutical%20Services.pdf)  
34 [11\\_Health\\_PBS\\_sup1/\\$File/Outcome%202%20-](http://www.health.gov.au/internet/budget/publishing.nsf/Content/2010-11_Health_PBS_sup1/$File/Outcome%202%20-%20Access%20to%20Pharmaceutical%20Services.pdf)  
35 [%20Access%20to%20Pharmaceutical%20Services.pdf](http://www.health.gov.au/internet/budget/publishing.nsf/Content/2010-11_Health_PBS_sup1/$File/Outcome%202%20-%20Access%20to%20Pharmaceutical%20Services.pdf). (accessed 9 Feb 2012).
- 36 34 *eTG complete [CD-ROM]. Melbourne (VIC): Therapeutic Guidelines, 2011 Nov*  
37 *Rossi S (Editor), Australian Medicines Handbook 2012 (CD-ROM). Adelaide:*  
38 *Australian Medicines Handbook Pty Ltd; 2012*
- 39 36 NSW Therapeutic Advisory Group. Indicators for Quality Use of Medicines in  
40 Australian Hospitals 2007  
41 [http://www.ciap.health.nsw.gov.au/nswtag/publications/QUMIndicators/Manual](http://www.ciap.health.nsw.gov.au/nswtag/publications/QUMIndicators/Manual0408.pdf)  
42 [0408.pdf](http://www.ciap.health.nsw.gov.au/nswtag/publications/QUMIndicators/Manual0408.pdf) (accessed 8 Feb 2012).
- 43 37 Hypertension and target blood pressure. National Prescribing Service.  
44 Indicators of quality prescribing in Australian general practice. A Manual for  
45 Users [online]. Available from URL:  
46 [http://www.nps.org.au/ data/assets/pdf file/0019/37351/indicators\\_full.pdf](http://www.nps.org.au/data/assets/pdf_file/0019/37351/indicators_full.pdf)  
47 (accessed 11 Jan 2012)
- 48  
49  
50  
51  
52 38 Heart Foundation Guide to management of hypertension 2008. Updated  
53 December 2010.  
54 [http://www.heartfoundation.org.au/SiteCollectionDocuments/HypertensionGuid](http://www.heartfoundation.org.au/SiteCollectionDocuments/HypertensionGuidelines2008to2010Update.pdf)  
55 [elines2008to2010Update.pdf](http://www.heartfoundation.org.au/SiteCollectionDocuments/HypertensionGuidelines2008to2010Update.pdf) (accessed 16 Jan 2012).
- 56 39 *Australian Medicines Handbook Drug Choice Companion: Aged Care. 3rd edn.*  
57 *Adelaide: Australian Medicines Handbook Pty Ltd; 2010.*  
58  
59  
60

- 1  
2  
3 40 Charpentier MM, Bundeff MM. Treating hypertension in the very elderly. *Ann Pharmacother* 2011;45:1138-45.
- 4 41 Gribbin J, Hubbard R, Gladman JRF, *et al.* Risk of falls associated with antihypertensive medication; population-based case control study. *Age Ageing* 2010;39:592-97.
- 5 42 Tinetti ME, Kumar C. The patient who falls. *JAMA* 2010;303(3):258-66.
- 6 43 Therapeutics Initiative. Do statins have a role in primary prevention? An update. Therapeutics letter. March-April 2010; 77: 1-5. <http://www.ti.ubc.ca/letter77> (accessed 9 Jan 2012).
- 7 44 Ray KK, Seshasai SRK, Erqou S, *et al.* Statins and all-cause mortality in high-risk primary prevention. A meta-analysis of 11 randomised controlled trials involving 65,229 participants. *Arch Intern Med* 2010;170(12):1024-31.
- 8 45 deLorgeril M, Salen P, Abramson J, *et al.* Cholesterol lowering, cardiovascular diseases, and the rosuvastatin-JUPITER controversy. A critical reappraisal. *Arch Intern Med* 2010;170(12):1032-36.
- 9 46 Petersen LK, Christensen K, Kragstrup J. Lipid-lowering treatment to the end? A review of observational studies and RCTs on cholesterol and mortality in 80+-year olds. *Age Ageing* 2010;39:674-80.
- 10 47 Robinson JG. Lipid-lowering therapy for the primary prevention of cardiovascular disease in the elderly. Opportunities and challenges. *Drugs Aging* 2009;26(11):917-31.
- 11 48 Krum H, Jelinek M, Stewart S, *et al.* 2011 Update to National Heart Foundation of Australia and Cardiac Society of Australia and New Zealand guidelines for the prevention, detection and management of chronic heart failure in Australia, 2006 *MJA* 2011;194(8):405-09.
- 12 49 Krum H, Teerlink JR. Medical therapy for chronic heart failure. *Lancet* 2011;378:713-21.
- 13 50 Huang D, Cheng JWM. Pharmacologic management of heart failure with preserved ejection fraction. *Ann Pharmacother* 2010;44:1933-45.
- 14 51 Management of diastolic heart failure [revised 2008 June]. In: eTG complete [CD-ROM]. Melbourne: Therapeutic Guidelines Limited; 2011 Nov.
- 15 52 Huang N, Duggan K, Harman J. Lifestyle management of hypertension. *Aust Presc* 2008;31:150-53.
- 16 53 Stokes GS. Management of hypertension in the elderly patient. *Clinical Interventions in Aging* 2009;4:379-89.
- 17 54 Bajorek BV, Krass I, Ogle SJ, *et al.* Optimizing the use of antithrombotic therapy for atrial fibrillation in older people: A pharmacist-led multidisciplinary intervention. *J Am Geriatr Soc* 2005;53:1912-20.
- 18 55 De Caterina R, Hylek EM. Stroke prevention in atrial fibrillation: current status and near-future directions. *Am J Med* 2011;124:793-99.
- 19 56 Gillett RG, Norrell A. Considerations for safe use of statins: liver enzyme abnormalities and muscle toxicity. *Am Fam Physician* 2011;83(6):711-16.
- 20 57 Thomas JE, Tershakovec AM, Jones-Burton C, *et al.* Lipid lowering for secondary prevention of cardiovascular disease in older adults. *Drugs Aging* 2010;27(12):959-72.
- 21 58 Perrotta C, Aznar M, Mejia R, *et al.* Oestrogens for preventing recurrent urinary tract infection in postmenopausal women. *Cochrane Database of Systematic Reviews* 2008, Issue 2. Art. No.: CD005131. DOI: 10.1002/14651858.CD005131.pub2. 2008.

- 1  
2  
3 59 Treatment of hypothyroidism [revised 2009 June]. In: eTG complete [CD-  
4 ROM]. Melbourne: Therapeutic Guidelines Limited; 2011 July.  
5  
6  
7  
8 60 Reducing Risk in Heart Disease 2007. A summary guide for preventing  
9 cardiovascular events in people with coronary heart disease. Updated 2008.  
10 National Heart Foundation of Australia and  
11 the Cardiac Society of Australia and New Zealand.  
12 [http://www.heartfoundation.org.au/information-for-professionals/Clinical-](http://www.heartfoundation.org.au/information-for-professionals/Clinical-Information/Pages/coronary-heart-disease.aspx)  
13 [Information/Pages/coronary-heart-disease.aspx](http://www.heartfoundation.org.au/information-for-professionals/Clinical-Information/Pages/coronary-heart-disease.aspx) (accessed 10 Jan 2012).  
14 61 Volpe M. Should all patients at high cardiovascular risk receive renin-  
15 angiotensin system blockers? *Q J Med* 2012;105:11-27.  
16 62 Boyd CM, Leff B, Wolff JL, *et al*. Informing clinical practice guideline  
17 development and implementation: prevalence of coexisting conditions among  
18 adults with coronary heart disease. *J Am Geriatr Soc* 2011;59:797-805.  
19 63 Heart Foundation. Guide to management of Hypertension 2008 [online].  
20 Available from URL:  
21 [http://www.heartfoundation.org.au/SiteCollectionDocuments/A\\_Hypert\\_Guideli-](http://www.heartfoundation.org.au/SiteCollectionDocuments/A_Hypert_Guidelines2008_2009Update_LifestyleModification_FINAL.pdf)  
22 [nes2008\\_2009Update\\_LifestyleModification\\_FINAL.pdf](http://www.heartfoundation.org.au/SiteCollectionDocuments/A_Hypert_Guidelines2008_2009Update_LifestyleModification_FINAL.pdf) [Accessed 2010 June 8].  
23 64 Guidelines for the assessment of absolute cardiovascular disease risk.  
24 [http://www.heartfoundation.org.au/SiteCollectionDocuments/guidelines-](http://www.heartfoundation.org.au/SiteCollectionDocuments/guidelines-Absolute-risk.pdf)  
25 [Absolute-risk.pdf](http://www.heartfoundation.org.au/SiteCollectionDocuments/guidelines-Absolute-risk.pdf) (accessed 16 Jan 2012).  
26 65 Holmes HM. Rational prescribing for patients with a reduced life expectancy.  
27 *Clin Pharmacol Ther* 2009;85(1):103-7.  
28 66 Improving treatment of systolic heart failure. NPS News 75, 2011. National  
29 Prescribing Service Limited.  
30 [http://www.nps.org.au/ data/assets/pdf file/0006/132495/News75\\_heart failure](http://www.nps.org.au/data/assets/pdf_file/0006/132495/News75_heart_failure_1011v2.pdf)  
31 [\\_1011v2.pdf](http://www.nps.org.au/data/assets/pdf_file/0006/132495/News75_heart_failure_1011v2.pdf) (accessed 16 Jan 2011).  
32 67 Caughey GE, Roughead EE, Shakib S, *et al*. Co-morbidity and potential  
33 treatment conflicts in elderly heart failure patients. *Drugs Aging* 2011;28(7):575-  
34 81.  
35 68 Lip GYH, Halperin JL. Improving stroke risk stratification in atrial fibrillation.  
36 *Am J Med* 2010;123:484-88.  
37 69 Hughes M, Lip GYH. Risk factors for anticoagulation-related bleeding  
38 complications in patients with atrial fibrillation: a systematic review. *Q J Med*  
39 2007;100:599-607.  
40 70 Statins and muscle disorders - be careful with the dose. Australian Adverse  
41 Drug Reactions Bulletin 2008; 27 (3). <http://www.tga.gov.au/pdf/aadrb-0806.pdf>  
42 (accessed 17 Jan 2012)  
43 71 LeChauncy WD, Landrum CR, Urech TH, *et al*. Treating chronically ill people  
44 with diabetes mellitus with limited life expectancy: Implications for performance  
45 measurement. *J Am Geriatr Soc* 2012;DOI: 10.1111/j.1532-5415.2011.03784.x:1-  
46 9.  
47 72 Lee SJ, Boscardin WJ, Cenzer IS, *et al*. The risks and benefits of implementing  
48 glycemic control guidelines in frail older adults with diabetes mellitus. *J Am*  
49 *Geriatr Soc* 2011;59:666-72.  
50 73 Joint Formulary Committee. British National Formulary (online) London: BMJ  
51 Group and Pharmaceutical Press <<http://www.medicinescomplete.com>>  
52 [Accessed on 17 Jan 2012].  
53  
54  
55  
56  
57  
58  
59  
60

- 1  
2  
3 74 Analgesic choices in persistent pain. *Prescribing Practice Review* 2006; 35.  
4 National Prescribing Service Limited  
5 [http://www.nps.org.au/\\_data/assets/pdf\\_file/0017/23750/ppr35\\_analgesics\\_0906.](http://www.nps.org.au/_data/assets/pdf_file/0017/23750/ppr35_analgesics_0906.pdf)  
6 [pdf](http://www.nps.org.au/_data/assets/pdf_file/0017/23750/ppr35_analgesics_0906.pdf) (accessed 17 Jan 2012).
- 7 75 Hill KD, Wee R. Psychotropic drug-induced falls in older people. A review of  
8 interventions aimed at reducing the problem. *Drugs Aging* 2012;29(1):15-30.
- 9 76 Zeimer H. Medications and falls in older people. *Journal of Pharmacy Practice*  
10 *and Research* 2008;38(2):148-51.
- 11 77 Caughey GE, Roughead EE, Shakib S, *et al.* Comorbidity of chronic disease and  
12 potential treatment conflicts in older people dispensed antidepressants. *Age*  
13 *Ageing* 2010;39:488-94.
- 14 78 Proton pump inhibitors. NPS News 46, 2006. National Prescribing Service  
15 Limited.  
16 [http://www.nps.org.au/\\_data/assets/pdf\\_file/0016/23821/news46\\_gord\\_ppis\\_060](http://www.nps.org.au/_data/assets/pdf_file/0016/23821/news46_gord_ppis_0606.pdf)  
17 [6.pdf](http://www.nps.org.au/_data/assets/pdf_file/0016/23821/news46_gord_ppis_0606.pdf) (accessed 19 Jan 2012).
- 18 79 National Asthma Council Australia. Asthma Management Handbook 2006.  
19 National Asthma Council Australia, Melbourne, 2006  
20 [http://www.nationalasthma.org.au/uploads/handbook/370-amh2006\\_web\\_5.pdf](http://www.nationalasthma.org.au/uploads/handbook/370-amh2006_web_5.pdf)  
21 (accessed 19 Jan 2012).
- 22 80 Inderjeeth CA, Poland KE. Management of osteoporosis in older people. *J*  
23 *Pharm Pract Res* 2010;40:229-34.
- 24 81 Reducing fracture risk in osteoporosis. NPS News 73, 2011. National Prescribing  
25 Service Limited.  
26 [http://www.nps.org.au/\\_data/assets/pdf\\_file/0014/126401/News73\\_osteoporosis\\_](http://www.nps.org.au/_data/assets/pdf_file/0014/126401/News73_osteoporosis_0511.pdf)  
27 [0511.pdf](http://www.nps.org.au/_data/assets/pdf_file/0014/126401/News73_osteoporosis_0511.pdf) (accessed 27 Jan 12).
- 28 82 Gates BJ, Sonnett TE, DuVall CAK, *et al.* Review of osteoporosis  
29 pharmacotherapy for geriatric patients. *Am J Geriatr Pharmacother* 2009;7:293-  
30 323.
- 31 83 Cheung AM, Detsky AS. Osteoporosis and fractures - Missing the bridge?  
32 *JAMA* 2008;299(12):1468-70.
- 33 84 Evans SM, Lowinger JS, Sprivulis PC, *et al.* Prioritizing quality indicator  
34 development across the healthcare system: identifying what to measure. *Intern*  
35 *Med J* 2009;39:648-54.
- 36 85 Elliott RA, Woodward MC, Osborne CA. Indicators of prescribing quality for  
37 elderly hospital inpatients. *Aust J Hosp Pharm* 2001;31:19-25.
- 38 86 National Prescribing Service. Indicators of quality prescribing in Australian  
39 general practice 2006. A Manual for Users.  
40 [http://www.nps.org.au/\\_data/assets/pdf\\_file/0019/37351/indicators\\_full.pdf](http://www.nps.org.au/_data/assets/pdf_file/0019/37351/indicators_full.pdf)  
41 (accessed 14 Feb 2012).
- 42 87 Laroche ML, Charmes JP, Merle L. Potentially inappropriate medications in  
43 the elderly: a French consensus panel list. *European Journal of Clinical*  
44 *Pharmacology* 2007;63:725-31.
- 45 88 Morris CJ, Cantrill JA, Hepler CD, *et al.* Preventing drug-related morbidity--  
46 determining valid indicators. *International Journal for Quality in Health Care*  
47 2002;14(3):183-98.
- 48 89 Bell JS, Le Couteur DG, McLachlan AJ, *et al.* Improving medicine selection for  
49 older people. Do we need an Australian classification for inappropriate  
50 medicines use? *Aust Fam Physician* 2012;41:9-10.  
51  
52  
53  
54  
55  
56  
57  
58  
59  
60

- 1  
2  
3 90 Caughey GE, Vitry AI, Gilbert AL, *et al.* Prevalence of comorbidity of chronic  
4 diseases in Australia. *BMC Public Health* 2008.  
5 <http://www.biomedcentral.com/1471-2458/8/221>. (accessed 23 Feb 2012).
- 6 91 Boyd CM, Darer J, Boulton C, *et al.* Clinical practice guidelines and quality of care  
7 for older patients with multiple comorbid diseases. *JAMA* 2005;294:716-24.
- 8 92 Kamerow D. How can we treat multiple chronic conditions? *BMJ*  
9 2012;344:e1487 doi: 10.136/bmj.e87
- 10  
11  
12 93 McGory ML, Kao KK, Shekelle PG, *et al.* Developing quality indicators for  
13 elderly surgical patients. *Ann Surg* 2009;250:338-47.
- 14 94 SooHoo NF, Lieberman JR, Farnig E, *et al.* Development of quality of care  
15 indicators for patients undergoing total hip or total knee replacement. *Qual Saf*  
16 2011;20:153-57.
- 17 95 Avery AJ, Dex GM, Mulvaney C, *et al.* Development of prescribing-safety  
18 indicators for GPs using the RAND appropriateness method. *Brit J Gen Pract*  
19 2011;61:e526-36.
- 20 96 Shekelle PG. Appropriateness criteria: a useful tool for the cardiologist. *Heart*  
21 2009;95(7):517-20.
- 22 97 Campbell SM, Braspenning J, Hutchinson A, *et al.* Research methods used in  
23 developing and applying quality indicators in primary care. *Qual Saf Health*  
24 *Care* 2002;11:358-64.
- 25 98 Vitry AI, Zhang Y. Quality of Australian clinical guidelines and relevance to the  
26 care of older people with multiple comorbid conditions. *Med J Aust*  
27 2008;189:360-65.
- 28 99 Lee SJ, Walter LC. Quality indicators for older adults. Preventing unintended  
29 harms. *JAMA* 2011;306(13):1481-82.
- 30 100 Gilbert AL, Caughey GE, Vitry AI, *et al.* Ageing well: Improving the  
31 management of patients with multiple chronic health problems. *Australas J*  
32 *Ageing* 2011;30(S2):32-37.
- 33 101 Gnjidic D, Hilmer SN, Blyth FM, *et al.* High-risk prescribing and incidence of  
34 frailty among older community-dwelling men. *Clin Pharmacol Ther*  
35 2012;91(3):521-28.
- 36 102 Sirois C, Moisan J, Poirier P, *et al.* Association between age and the initiation of  
37 antihypertensive, lipid lowering and antiplatelet medications in elderly  
38 individuals newly treated with antidiabetic drugs. *Age Ageing* 2009;38:741-45.
- 39 103 Powers JH. Practice guidelines. Belief, criticism, and probability. *Arch Intern*  
40 *Med* 2011;171(1):15-16.
- 41 104 Evidence-practice gaps report. Vol. 1. National Institute of Clinical Studies,  
42 Australian Government 2003.  
43 [http://www.nhmrc.gov.au/nics/material\\_resources/resources/evidence\\_volume\\_0](http://www.nhmrc.gov.au/nics/material_resources/resources/evidence_volume_0)  
44 [ne.htm](http://www.nhmrc.gov.au/nics/material_resources/resources/evidence_volume_0). (accessed 16 Feb 2012).
- 45 105 Evidence-practice gaps report. vol. 2. National Institute of Clinical Studies.  
46 Australian Government 2005.  
47 [http://www.nhmrc.gov.au/nics/material\\_resources/resources/evidence\\_volume\\_t](http://www.nhmrc.gov.au/nics/material_resources/resources/evidence_volume_t)  
48 [wo.htm](http://www.nhmrc.gov.au/nics/material_resources/resources/evidence_volume_t). (accessed 16 Feb 2012).
- 49 106 Basger BJ, Chen TF, Moles RJ. Application of a prescribing indicators tool to  
50 assist in identifying drug-related problems in a cohort of older Australians. *Int J*  
51 *Pharm Pract* 2011;doi: 10.1111/j.2042-7174.2011.00177.x:1-11.
- 52  
53  
54  
55  
56  
57  
58  
59  
60



STROBE 2007 (v4) Statement—Checklist of items that should be included in reports of cohort studies

| Section/Topic             | Item # | Recommendation                                                                                                                                                                       | Reported on page # |
|---------------------------|--------|--------------------------------------------------------------------------------------------------------------------------------------------------------------------------------------|--------------------|
| Title and abstract        | 1      | (a) Indicate the study’s design with a commonly used term in the title or the abstract                                                                                               | 1                  |
|                           |        | (b) Provide in the abstract an informative and balanced summary of what was done and what was found                                                                                  | 1-2                |
| <b>Introduction</b>       |        |                                                                                                                                                                                      |                    |
| Background/rationale      | 2      | Explain the scientific background and rationale for the investigation being reported                                                                                                 | 2-3                |
| Objectives                | 3      | State specific objectives, including any prespecified hypotheses                                                                                                                     | 3                  |
| <b>Methods</b>            |        |                                                                                                                                                                                      |                    |
| Study design              | 4      | Present key elements of study design early in the paper                                                                                                                              | 3-4                |
| Setting                   | 5      | Describe the setting, locations, and relevant dates, including periods of recruitment, exposure, follow-up, and data collection                                                      | 4                  |
| Participants              | 6      | (a) Give the eligibility criteria, and the sources and methods of selection of participants. Describe methods of follow-up                                                           | 3-4                |
|                           |        | (b) For matched studies, give matching criteria and number of exposed and unexposed                                                                                                  | N/A                |
| Variables                 | 7      | Clearly define all outcomes, exposures, predictors, potential confounders, and effect modifiers. Give diagnostic criteria, if applicable                                             | 4                  |
| Data sources/ measurement | 8*     | For each variable of interest, give sources of data and details of methods of assessment (measurement). Describe comparability of assessment methods if there is more than one group | 4                  |
| Bias                      | 9      | Describe any efforts to address potential sources of bias                                                                                                                            | 4                  |
| Study size                | 10     | Explain how the study size was arrived at                                                                                                                                            | 4                  |
| Quantitative variables    | 11     | Explain how quantitative variables were handled in the analyses. If applicable, describe which groupings were chosen and why                                                         | 4                  |
| Statistical methods       | 12     | (a) Describe all statistical methods, including those used to control for confounding                                                                                                | 4                  |
|                           |        | (b) Describe any methods used to examine subgroups and interactions                                                                                                                  | N/A                |
|                           |        | (c) Explain how missing data were addressed                                                                                                                                          | N/A                |
|                           |        | (d) If applicable, explain how loss to follow-up was addressed                                                                                                                       | N/A                |
|                           |        | (e) Describe any sensitivity analyses                                                                                                                                                | N/A                |
| <b>Results</b>            |        |                                                                                                                                                                                      |                    |

|                          |     |                                                                                                                                                                                                              |       |
|--------------------------|-----|--------------------------------------------------------------------------------------------------------------------------------------------------------------------------------------------------------------|-------|
| Participants             | 13* | (a) Report numbers of individuals at each stage of study—eg numbers potentially eligible, examined for eligibility, confirmed eligible, included in the study, completing follow-up, and analysed            | 4     |
|                          |     | (b) Give reasons for non-participation at each stage                                                                                                                                                         | 4     |
|                          |     | (c) Consider use of a flow diagram                                                                                                                                                                           | N/A   |
| Descriptive data         | 14* | (a) Give characteristics of study participants (eg demographic, clinical, social) and information on exposures and potential confounders                                                                     | 4     |
|                          |     | (b) Indicate number of participants with missing data for each variable of interest                                                                                                                          | N/A   |
|                          |     | (c) Summarise follow-up time (eg, average and total amount)                                                                                                                                                  | 4     |
| Outcome data             | 15* | Report numbers of outcome events or summary measures over time                                                                                                                                               | 5     |
| Main results             | 16  | (a) Give unadjusted estimates and, if applicable, confounder-adjusted estimates and their precision (eg, 95% confidence interval). Make clear which confounders were adjusted for and why they were included | N/A   |
|                          |     | (b) Report category boundaries when continuous variables were categorized                                                                                                                                    | N/A   |
|                          |     | (c) If relevant, consider translating estimates of relative risk into absolute risk for a meaningful time period                                                                                             | N/A   |
| Other analyses           | 17  | Report other analyses done—eg analyses of subgroups and interactions, and sensitivity analyses                                                                                                               | 5-13  |
| <b>Discussion</b>        |     |                                                                                                                                                                                                              |       |
| Key results              | 18  | Summarise key results with reference to study objectives                                                                                                                                                     | 17-18 |
| <b>Limitations</b>       |     |                                                                                                                                                                                                              |       |
| Interpretation           | 20  | Give a cautious overall interpretation of results considering objectives, limitations, multiplicity of analyses, results from similar studies, and other relevant evidence                                   | 19    |
| Generalisability         | 21  | Discuss the generalisability (external validity) of the study results                                                                                                                                        | 18-19 |
| <b>Other information</b> |     |                                                                                                                                                                                                              |       |
| Funding                  | 22  | Give the source of funding and the role of the funders for the present study and, if applicable, for the original study on which the present article is based                                                | 20    |

\*Give information separately for cases and controls in case-control studies and, if applicable, for exposed and unexposed groups in cohort and cross-sectional studies.

**Note:** An Explanation and Elaboration article discusses each checklist item and gives methodological background and published examples of transparent reporting. The STROBE checklist is best used in conjunction with this article (freely available on the Web sites of PLoS Medicine at <http://www.plosmedicine.org/>, Annals of Internal Medicine at <http://www.annals.org/>, and Epidemiology at <http://www.epidem.com/>). Information on the STROBE Initiative is available at [www.strobe-statement.org](http://www.strobe-statement.org).



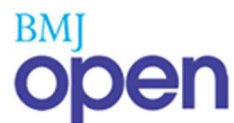

**Validation of prescribing appropriateness criteria for older Australians using the RAND/UCLA Appropriateness Method**

|                                 |                                                                                                                                                                                                  |
|---------------------------------|--------------------------------------------------------------------------------------------------------------------------------------------------------------------------------------------------|
| Journal:                        | <i>BMJ Open</i>                                                                                                                                                                                  |
| Manuscript ID:                  | bmjopen-2012-001431.R1                                                                                                                                                                           |
| Article Type:                   | Research                                                                                                                                                                                         |
| Date Submitted by the Author:   | 20-Jul-2012                                                                                                                                                                                      |
| Complete List of Authors:       | Basger, Benjamin; The University of Sydney, Faculty of Pharmacy<br>Chen, Timothy; The University of Sydney, Faculty of Pharmacy<br>Moles, Rebekah; The University of Sydney, Faculty of Pharmacy |
| <b>Primary Subject Heading</b>: | Geriatric medicine                                                                                                                                                                               |
| Secondary Subject Heading:      | Research methods, Pharmacology and therapeutics, Medical education and training, Evidence based practice                                                                                         |
| Keywords:                       | drug-related problems, prescribing criteria, older patients, inappropriate drug use                                                                                                              |
|                                 |                                                                                                                                                                                                  |

SCHOLARONE™  
Manuscripts

Peer Review Only

## Validation of prescribing appropriateness criteria for older Australians using the RAND/UCLA Appropriateness Method

### ARTICLE SUMMARY

#### Article focus

- Drug-related problems (DRPs) are common in older people, resulting in under-treatment with proven medicines, and disproportionately high numbers of adverse drug events
- The aim of this study was to validate a list of prescribing appropriateness criteria for use in older people

#### Key messages

- The use of medication assessment criteria is one method to assist in identifying DRPs. Criteria developed elsewhere may have little or no applicability to the Australian healthcare environment
- Validation of proposed Australian prescribing appropriateness criteria for older people was accomplished using a two-round modified Delphi method, resulting in agreement for all criteria as measured by median panel ratings, and the amount of dispersion of panel ratings, based on the interpercentile range
- Use of these criteria, together with other Australian medication review processes, may assist in improving patient care in a variety of settings by efficiently identifying DRPs to common medical conditions and commonly used medicines, and in. They may also contribute to the medication management education knowledge of health care professionals through education programs and by use in daily practice, and for the evaluation of the quality of pharmaceutical care in older people

#### Strengths and limitations

- A validated consensus method was used involving an expert medication management panel of varied specialization. Criteria were based on established evidence-practice gaps and degree of disease burden imposed on the health care system, and were written with the aim of conciseness and clarity
- Further developmental work is required to assess the usefulness of these criteria, which only included commonly occurring medicines and medical conditions

### ABSTRACT

**Objective:** To update and validate proposed national prescribing appropriateness criteria to assist in identifying drug-related problems (DRPs) to commonly occurring medications and medical conditions in older ( $\geq 65$  years old) Australians.

**Design:** Rand/UCLA Appropriateness Method

**Participants:** A panel of medication management experts were identified consisting of geriatricians, clinical pharmacists, and disease management advisors to organisations that

1  
2  
3 produce Australian evidence-based therapeutic publications. This resulted in a round one  
4 panel of fifteen members, and a round two panel of twelve members

5 **Main outcome measure:** Agreement on all criteria

6  
7 **Results:** Forty eight prescribing criteria were rated. In the first rating round via email, there  
8 was disagreement regarding ~~35% (17/48)~~ 17 of the criteria according to median panel ratings.  
9 During a face-to-face second round meeting, discussion resulted in ~~81% (39/48)~~ of the  
10 proposed criteria being accepted, with ~~52% (25/48 of 48 criteria)~~ requiring amendment or  
11 updating. ~~Twenty nine per cent (14/48 criteria)~~ Fourteen were unchanged, and ~~19% (9/48~~  
12 ~~)criteria~~ deleted. Two new criteria were added, resulting in a final validated list of 41  
13 prescribing appropriateness criteria. Agreement was reached for all 41 criteria, measured by  
14 median panel ratings and the amount of dispersion of panel ratings, based on the  
15 interpercentile range  
16  
17

18 **Conclusions:** A set of 41 Australian prescribing appropriateness criteria were validated by an  
19 expert panel. Use of these criteria, together with clinical judgement and other medication  
20 review processes such as patient interview, is intended to assist in improving patient care by  
21 efficiently detecting potential DRPs related to commonly occurring medicines and medical  
22 conditions in older Australians. These criteria may also contribute to the medication  
23 management education of health care professionals  
24  
25  
26

## 27 INTRODUCTION

28  
29 Drug-related problems (DRPs) in older people ( $\geq 65$  years old) are common,[1-4] resulting in  
30 both undertreatment with proven medicines[5-7] and disproportionately high numbers of  
31 serious adverse medication events due to polypharmacy.[8-10] DRPs can occur for many  
32 reasons such as inadequate monitoring of medicines, poor medicine or dose selection,  
33 duplication of medicines, or factors to do with the way the patient uses the medicine.[2 ,3 ,11  
34 ,12] -Methods to identify and reduce DRPs include educational interventions, [13]  
35 comprehensive geriatric assessment, [14] discontinuation of multiple medications, [15  
36 ,16]electronic health record clinical decision support, [17 ,18]and the use of medication  
37 assessment criteria.[13 ,19-22]  
38  
39  
40  
41

42 However in older patients, the importance of traditional outcomes, such as discrete clinical  
43 events or mortality, may be secondary to maintaining physical and cognitive function or relief  
44 of symptoms.[23] Because of this, optimal care requires clinical decision support tools that  
45 consider issues such as patient preferences, frailty, cost, and co-morbidities.[24] Additionally,  
46 few criteria target the oldest old;[25] (generally regarded as people older than 85 years),  
47 where evidence may be poor, and preventive interventions may be encouraged in patients  
48 who have already exceeded an average lifespan.[26 ,27] -In Australia, issues such as these are  
49 intended to be considered when patients are interviewed by an accredited pharmacist as part  
50 of the Home Medicines Review program.[28] This program aims to provide the  
51 sophistication lacking in explicit (that is, criterion-based rather than implicit or judgement  
52 based) criteria measures such as our criteria list, and is targeted towards patients who may be  
53 (among other reasons) currently taking  $\geq 5$  regular medicines, attending a number of different  
54 doctors, or have recently been discharged from hospital.  
55  
56  
57  
58  
59  
60

1  
2  
3  
4 In 2008, we proposed a list of 48 prescribing appropriateness criteria (45 explicit and three  
5 implicit) aimed at improving detection of -DRPs, ~~to be used~~ as part of the Australian  
6 medication review process.[29] When applied to a cohort of older Australians, a high  
7 incidence of undertreatment and use of inappropriate medicines was detected.[30] It was also  
8 intended that our criteria have application in other areas, as criteria derived outside Australia  
9 have been applied in a variety of settings such as community, nursing home and hospital.[19]  
10 and have been applied using a variety of study designs such as in retrospective cross-sectional  
11 studies, randomized controlled trials, and in retrospective and prospective case series.[13]  
12 They have been used in daily clinical practice;[31] in the evaluation of health plans[31] and in  
13 the evaluation of knowledge of appropriate prescribing;[32] in the training of health care  
14 professionals;[33] to evaluate nursing home adherence to medicine-related regulations;[33]  
15 and to develop healthcare quality indicators.[34]

16  
17  
18  
19  
20  
21 The appropriateness of health care delivery in Australia for common conditions, such as atrial  
22 fibrillation and osteoarthritis, has been shown to be poor.[35] ~~These~~ Our criteria were based  
23 on the most frequent ~~medications~~ medicines prescribed to Australians, and the most frequent  
24 medical conditions for which older Australians (≥ 65 years old) consult medical practitioners.  
25 Australian medication and disease state resources and guidelines were used to provide  
26 content validity.[29] However, unlike our criteria, other prescribing criteria or tools have  
27 combined evidence with expert opinion to provide face validity.[36 ,37]

28  
29  
30  
31 The aim of this study was to update our list of criteria. We wished to add missing  
32 recommendations; adding recommendations for co-morbidity and for the oldest old, where  
33 possible, and to validate the criteria through expert consensus. To do this, we identified a  
34 panel of medication management experts, and chose the RAND/UCLA appropriateness  
35 method,[38] which has been described as the best method for systematically combining  
36 recommendations from clinical guidelines, with the opinion of healthcare providers.[39]

## 37 38 39 40 **METHODS**

### 41 42 **Ethics**

43 Ethics approval was obtained from the Human Research Ethics Committee of the University  
44 of Sydney.

### 45 46 47 **Criteria development**

48 In 2008, ~~we cross-referenced~~ we found the fifty 50 highest-volume Australian  
49 Pharmaceutical Benefits Scheme (PBS) ~~medications~~ medicines prescribed, with and the forty  
50 most common reasons for older Australians to seek or receive healthcare. Healthcare  
51 information was obtained using the BEACH (Bettering The Evaluation and Care of Health)  
52 program, which continuously collects information about the clinical activities in general  
53 practice in Australia.[40] We then used Australian medication information sources ~~were then~~  
54 used to identify both optimal and inappropriate medication management of these common  
55 conditions.[29] In Australia, medication availability and use is largely determined by the  
56  
57  
58  
59  
60

1  
2  
3 PBS.[41] In October 2011, commonly used medications and medical conditions were  
4 checked and updated using the BEACH program to ensure that criteria content was current.  
5 Changes in evidence, product information, Australian consensus documents, evidence-based  
6 publication recommendations or clinical practice guidelines relating to our criteria were noted  
7 for evaluation by an expert medication management panel. The criteria were designed to  
8 provide guidance on the process of care wherever it occurred – community, hospital, ~~hostel~~  
9 residential home, care home or nursing home. Major considerations in their development  
10 were feasibility potential accessibility of data ~~collection from the patient, their medical notes~~  
11 and/or their health care professional(s), -conciseness and clarity of wording, and provision of  
12 a practical number of criteria. Most were explicit to enable consistent application, with  
13 additional notes provided for interpretation where necessary. They were written as a  
14 statement of the kind of medication management that should or should not occur, to simplify  
15 comprehension and facilitate uptake.[29]  
16  
17  
18  
19

### 20 21 **Validation of criteria - participants**

22 ~~To ensure comprehensive representation, we~~ We recruited ~~three groups a multidisciplinary~~  
23 group of medication management experts to review, update and rate the criteria, consisting of  
24 ; geriatricians/pharmacologists, clinical pharmacists, and disease management advisors to  
25 organisations that produce Australian evidence-based therapeutic publications. This resulted  
26 in a round one panel of fifteen members. The geriatricians consisted of two professors of  
27 geriatric medicine; an associate professor of clinical pharmacology and aged care; a research  
28 fellow in geriatric medicine; and a hospital staff geriatrician. Clinical pharmacists consisted  
29 of a residential medication management review pharmacist; a home medicines review  
30 pharmacist; four hospital-based pharmacists (two team leaders, one director and one  
31 education and training pharmacist), and a professor of aged care (Pharmacy). Disease  
32 management advisors to Australian evidence-based therapeutic organisations consisted of  
33 Therapeutic Guidelines,[42] Australian Medicines Handbook,[43] and the New South Wales  
34 Therapeutic Advisory Group.[44]  
35  
36  
37  
38  
39

### 40 **RAND/UCLA appropriateness method**

41 The RAND/UCLA appropriateness method has been used to rate lists ranging up to over  
42 3000 indications, where panellists have been asked to use the clinical literature and their best  
43 clinical judgement to assess the appropriateness of performing a procedure. To do this, they  
44 have rated various clinical scenarios.[45] While the number and type of our criteria may differ  
45 to this, similar criteria have been developed using the RAND/UCLA method. For example, in  
46 the development of indicators for patients undergoing total hip or total knee replacement, one  
47 of the 68 indicators stated that for such patients, “deep venous thrombosis prophylaxis should  
48 be provided for a minimum of two weeks after hospital discharge”.[46] In the development of  
49 indicators for hazardous prescribing for GPs using this method, one of the 34 indicators  
50 identified the hazardous use of “NSAID in a patient with heart failure”.[47] We therefore  
51 followed a similar protocol.  
52  
53  
54  
55

### 56 **RAND/UCLA Appropriateness Method round one**

1  
2  
3 In October 2011 candidate panel members were emailed an explanation of the project and an  
4 invitation to participate. After acceptance, they were emailed a rating sheet consisting of 48  
5 criteria, and asked to rate each on a nine point scale, ~~where one meant highly~~ Ratings of 1-3  
6 were classified as inappropriate, with a rating of one indicating the greatest degree of  
7 inappropriateness. Ratings of 7-9 were classified as appropriate, with a rating of nine  
8 indicating the greatest degree of appropriateness. Ratings of 4-6 were classified as neither  
9 appropriate nor inappropriate. inappropriate, and nine represented criteria that were highly  
10 appropriate. Appropriate was defined as “the expected health benefit exceeds the expected  
11 negative consequences by a sufficiently wide margin that criteria are worth following,  
12 exclusive of cost”. They also received a description of the way in which the criteria had been  
13 derived, and a comparison with other prescribing criteria.[25 ,29] Panel members were  
14 requested to amend the wording or delete, update or identify missing criteria as required.  
15 Upon return of the rating sheets, results were tabulated. Agreement was based on four or less  
16 panellists rating outside the three-point region containing the median (1-3; 4-6; 7-9), and  
17 disagreement was based on five or more panellists rating in each extreme (1-3 and 7-9)  
18 median panel ratings and the amount of dispersion of panel ratings, as per the RAND/UCLA  
19 protocol for a fifteen member panel. Specifically, the median value, Additionally, the 30th  
20 and 70th percentiles adjusted for symmetry interpercentile range (IPR) and interpercentile  
21 range adjusted for symmetry (IPRAS) was were computed for each of the criteria, as it has  
22 been found that when ratings were symmetric with respect to the middle (five on the 1-9  
23 scale), the interpercentile range (IPR) required to label an indication as disagreement was  
24 smaller than when they were asymmetric with respect to the middle (values far from five on  
25 the 1-9 scale). Agreement occurred when the interpercentile range adjusted for symmetry  
26 (IPRAS) was greater than the IPR .-[38]

### 34 35 **Rand/UCLA Appropriateness Method round two**

36 In November 2011, a face-to-face meeting of the expert panel, chaired by a panel moderator  
37 experienced in facilitating group discussions and criteria development, met to discuss the  
38 results of round one and re-rate each of the criteria and any potential additional criteria. - One  
39 pharmacist, one staff geriatrician and a disease management advisor for a therapeutics  
40 publication could not attend, resulting in a twelve member panel. For this meeting, each panel  
41 member was provided with a copy of the results from round one. This consisted of the  
42 frequency distribution of ratings of all panellists across the 9-point scale, the overall panel  
43 median rating for each of the criteria and, for each panellist, an annotation of how they had  
44 rated each of the criteria. Scores from other panel members were not revealed. Depending  
45 upon panellists votes, panel agreement or disagreement was also stated for each of the round  
46 one criteria.

47  
48 Discussion at round two occurred on the level of agreement for each of the criteria. In  
49 addition, discussion was facilitated on the wording of each of the criteria to improve clarity  
50 and decide whether agreement would be reached. The definitions of Agreement and  
51 disagreement was were adjusted for the smaller second round twelve member panel.[38]

52 Agreement was reached when three or less panel members voted outside the 3-point region  
53 containing the median, or when the IPRAS was greater than the IPR. Disagreement was  
54  
55  
56  
57  
58  
59  
60



1  
2  
3 determined when four or more panellists rated in each extreme (1-3 and 7-9). Each of the  
4 criteria were then discussed, with panellists having the opportunity of changing their ratings  
5 if, for example, misinterpretation had occurred because of the way in which the criteria had  
6 been written, or if new evidence had become available, or if criteria had been interpreted in  
7 the light of a panellists own clinical experience. Each panel member consented to audio  
8 recording of the discussion. Values for the median, IPR and IPRAS were computed.[38]  
9

### 11 **Data analysis**

12 Median values, IPR and IPRAS were computed using SPSS version 20 (SPSS, Chicago, IL,  
13 USA). Audio recordings were transcribed.  
14  
15

### 17 **RESULTS**

18  
19  
20 ~~There was agreement on the appropriateness of 65% (31/48) of the original criteria at round~~  
21 ~~one, according to median panel ratings, and for all of the criteria according to the amount of~~  
22 ~~dispersion of panel ratings. Of criteria for which there was disagreement, 21% (10/48) were~~  
23 ~~retained after discussion and rewording, and 15% (7/48) were deleted. Two of the criteria for~~  
24 ~~which there was agreement were deleted after panel discussion, as they were addressed by~~  
25 ~~other criteria. In total 52% (25/48) of the criteria were reworded. This included criteria for~~  
26 ~~which agreement was reached. Twenty nine percent (14/48) of the criteria remained~~  
27 ~~unchanged. Two new criteria were added, resulting in a total of 41 validated criteria.~~  
28  
29

30  
31 After round one, there was agreement on the appropriateness of 31 of the 48 criteria, and  
32 disagreement for 17 criteria. Discussion at round two resulted in retention of 10 criteria for  
33 which there had been disagreement after round one, acceptance of 14 of the original criteria  
34 with no change, deletion of nine criteria, and addition of two new criteria, resulting in 41  
35 validated criteria.  
36  
37

38  
39 ~~Table 1~~An example of how the RAND/UCLA method was applied to each of our criteria is  
40 described in Table 1 for indicator one. The larger the IPRAS, the less asymmetric are the  
41 ratings. For example, thirteen of fifteen panellists at round one rated indicator fourteen with a  
42 score of eight or nine, for which the IPRAS was 8.35.  
43  
44

45 Table 2 -lists the median panel ratings, the amount of dispersion of panel ratings, and whether  
46 there was agreement or disagreement for the original criteria and the validated criteria. It also  
47 lists the amendments made by the panel to the original criteria, and the reasons for these  
48 amendments. There was 100% agreement for both median panel ratings and dispersion of  
49 panel ratings for the validated criteria. ~~Table 2~~Table 3 contains the final list of validated  
50 criteria, arranged according to disease states. ~~Table 3~~Table 4 lists usage information judged to  
51 be necessary for certain criteria.  
52  
53  
54  
55  
56  
57  
58  
59  
60



1  
2  
3  
4  
5  
6  
7  
8  
9  
10  
11  
12  
13  
14  
15  
16  
17  
18  
19  
20  
21  
22  
23  
24  
25  
26  
27  
28  
29  
30  
31  
32  
33  
34  
35  
36  
37  
38  
39  
40  
41  
42  
43  
44  
45  
46  
47  
48  
49  
50  
51  
52  
53  
54  
55  
56  
57  
58  
59  
60

| <u>Table 1 An example of the application of the RAND/UCLA appropriateness method to one criteria (indicator one) from round one</u> |                                                          |                                                                                                                                                                                                                       |                                                                                                                                                           |
|-------------------------------------------------------------------------------------------------------------------------------------|----------------------------------------------------------|-----------------------------------------------------------------------------------------------------------------------------------------------------------------------------------------------------------------------|-----------------------------------------------------------------------------------------------------------------------------------------------------------|
| <u>Nine point scale where 1-3 = inappropriate, 4-6 = neither appropriate nor inappropriate, 7-9 = appropriate</u>                   | <u>Number of panellists rating this indicator (n=15)</u> | <u>Calculations, interpercentile range method[38]</u>                                                                                                                                                                 | <u>Interpretation</u>                                                                                                                                     |
| <u>1</u>                                                                                                                            |                                                          | <u>30<sup>th</sup> percentile = 7.0</u>                                                                                                                                                                               | <u>This indicator was accepted according to the median method because four or less panellists voted outside the 3 point region containing the median.</u> |
| <u>2</u>                                                                                                                            |                                                          | <u>70<sup>th</sup> percentile = 8.0</u>                                                                                                                                                                               |                                                                                                                                                           |
| <u>3</u>                                                                                                                            | <u>1</u>                                                 | <u>Interpercentile range (IPR) = 70<sup>th</sup> minus 30<sup>th</sup> percentile) = 1.0</u>                                                                                                                          |                                                                                                                                                           |
| <u>4</u>                                                                                                                            |                                                          | <u>Interpercentile range central point (IPRCP) = 30<sup>th</sup> + 70<sup>th</sup> percentile divided by 2 = 7.5</u>                                                                                                  |                                                                                                                                                           |
| <u>5</u>                                                                                                                            | <u>1</u>                                                 | <u>Asymmetry index (AI) = [5 minus IPRCP] (as an absolute value) = 2.5</u>                                                                                                                                            |                                                                                                                                                           |
| <u>6</u>                                                                                                                            | <u>1</u>                                                 | <u>Interpercentile range adjusted for symmetry (IPRAS) = [2.5 plus (AI x 1.5)] = 6.1, where 2.5 is the IPR required for disagreement when perfect symmetry exists, and 1.5 is the correction factor for asymmetry</u> |                                                                                                                                                           |
| <u>7</u>                                                                                                                            | <u>5</u>                                                 |                                                                                                                                                                                                                       |                                                                                                                                                           |
| <u>8</u>                                                                                                                            | <u>5</u>                                                 |                                                                                                                                                                                                                       |                                                                                                                                                           |
| <u>9</u>                                                                                                                            | <u>2</u>                                                 |                                                                                                                                                                                                                       |                                                                                                                                                           |
|                                                                                                                                     | <u>median = 7.0</u>                                      |                                                                                                                                                                                                                       | <u>The IPRAS (6.1) was greater than the IPR (1.0) indicating no disagreement. The larger the IPRAS, the less asymmetric the ratings.</u>                  |

**Table 1** Table 2 Changes made to original criteria according to agreement, disagreement and panel discussion

| Criteria Number | Original prescribing appropriateness criteria for older (≥65 years) Australians                     | Rating by median method[38] (median value, A= agreement, D= disagreement), n=15 |   | Rating by IPRAS <sup>1</sup> method[38] (IPR value, IPRAS value, A = agreement, D = disagreement), n=15 |   | Validated prescribing appropriateness criteria for older (≥65 years) Australians                    | Rating by median method[38] (median value, A= agreement, D= disagreement), n=12 |   | Rating by IPRAS <sup>1</sup> method[38] (IPR value, IPRAS value, A = agreement, D = disagreement), n=12 |   | Amendment/reason                                                                                                                                                                                                                          |
|-----------------|-----------------------------------------------------------------------------------------------------|---------------------------------------------------------------------------------|---|---------------------------------------------------------------------------------------------------------|---|-----------------------------------------------------------------------------------------------------|---------------------------------------------------------------------------------|---|---------------------------------------------------------------------------------------------------------|---|-------------------------------------------------------------------------------------------------------------------------------------------------------------------------------------------------------------------------------------------|
|                 |                                                                                                     |                                                                                 |   |                                                                                                         |   |                                                                                                     |                                                                                 |   |                                                                                                         |   |                                                                                                                                                                                                                                           |
| 1.              | Patient taking an antihypertensive is at their target blood pressure                                | 7                                                                               | A | 1.00, 6.10                                                                                              | A | Patient taking an antihypertensive is at the target blood pressure appropriate for them             | 8                                                                               | A | 1.10, 7.52                                                                                              | A | “Appropriate for them” added. Current blood pressure guidelines may not be appropriate for all older patients[48-50]. For example, in the oldest old[51]; in palliative care; and for those who are/become hypotensive and/or fall[52,53] |
| 2.              | Patient at high risk of a cardiovascular event is taking a statin                                   | 7                                                                               | A | 1.00, 6.10                                                                                              | A | Patient at high risk of a recurrent cardiovascular event is taking a statin                         | 8                                                                               | A | 1.00, 6.10                                                                                              | A | “Recurrent” added to ensure use in secondary prevention of cardiovascular events rather than primary prevention, where evidence is less clear, especially in the oldest old[26,54-58]                                                     |
| 3.              | Patient with IHD or a history of MI is taking a beta blocker                                        | 8                                                                               | A | 2.00, 6.85                                                                                              | A | Patient with CHD or a history of MI is taking a beta blocker                                        | 7                                                                               | A | 1.00, 6.10                                                                                              | A | “CHD” replaced “IHD”. The term “coronary heart disease” is preferred over “ischemic heart disease”                                                                                                                                        |
| 4.              | Patient with IHD or a history of MI is taking an antiplatelet agent unless on an oral anticoagulant | 8                                                                               | A | 1.00, 7.60                                                                                              | A | Patient with CHD or a history of MI is taking an antiplatelet agent unless on an oral anticoagulant | 8                                                                               | A | 1.00, 7.60                                                                                              | A | “CHD” replaced “IHD”. The term “coronary heart disease” is preferred over “ischemic heart disease”                                                                                                                                        |
| 5               | Patient with heart failure is taking a beta blocker                                                 | 7                                                                               | A | 1.00, 6.10                                                                                              | A | Patient with stable heart failure with left systolic ventricular dysfunction (HF-                   | 8                                                                               | A | 0.10, 6.78                                                                                              | A | Description of heart failure amended. The use of beta blockers is contra-indicated in                                                                                                                                                     |

|     |                                                                                                                    |   |   |               |   |                                                                                                                        |   |   |               |   |                                                                                                                                                            |
|-----|--------------------------------------------------------------------------------------------------------------------|---|---|---------------|---|------------------------------------------------------------------------------------------------------------------------|---|---|---------------|---|------------------------------------------------------------------------------------------------------------------------------------------------------------|
|     |                                                                                                                    |   |   |               |   | LVSD) is taking a beta blocker                                                                                         |   |   |               |   | unstable heart failure. The optimal treatment of heart failure with preserved ejection fraction (HFPEF) is uncertain at this time[59 ,60]                  |
| 6.  | Patient with heart failure is taking an ACEI or A2A                                                                | 8 | A | 2.00<br>6.85  | A | Patient with stable heart failure with left systolic ventricular dysfunction (HF-LVSD) is taking an ACEI or A2A        | 9 | A | 1.00,<br>7.60 | A | Description of heart failure amended. The optimal treatment of heart failure with preserved ejection fraction (HFPEF) is uncertain at this time[59 ,60]    |
| 7.  | Patient with heart failure is NOT taking medications which may exacerbate heart failure                            | 9 | A | 1.00,<br>7.60 | A | Patient with HF-LVSD or HFPEF is NOT taking medications which may exacerbate heart failure                             | 9 | A | 0.10,<br>8.27 | A | Description of heart failure amended. The types of medicines contraindicated in HF-LVSD and HFPEF may not be identical[61 ,62]                             |
| 8   | Patient with heart failure or hypertension is NOT taking high sodium medications                                   | 8 | D | 2.20,<br>5.50 | A | Deleted                                                                                                                | - |   | -             | - | High sodium medicines (among others) in heart failure are addressed by indicator 7. In hypertension, they are addressed as lifestyle modifications[63 ,64] |
| 9.  | Patient with AF is taking an oral anticoagulant                                                                    | 7 | D | 2.0,<br>5.35  | A | Patient with AF is taking an oral anticoagulant or an antiplatelet agent, depending upon stroke risk and bleeding risk | 8 | A | 0.10,<br>6.93 | A | An antiplatelet agent may be appropriate for patients at low risk of stroke. Bleeding risk may determine choice of antithrombotic agent[50 ,65 ,66]        |
| 10. | Patient with AF taking an anticoagulant has an INR between 2 – 3                                                   | 8 | A | 2.20,<br>6.70 | A | Patient taking warfarin for AF has an INR between 2-3                                                                  | 9 | A | 1.00,<br>7.60 | A | New anticoagulants like rivaroxaban and dabigatran do not require INR monitoring                                                                           |
| 11. | Patient with a history of non-hemorrhagic stroke or TIA is taking an antiplatelet agent unless on an anticoagulant | 8 | A | 1.00,<br>7.60 | A | Patient with a history of non-hemorrhagic stroke or TIA is taking an antiplatelet agent unless on an anticoagulant     | 9 | A | 1.00,<br>7.60 | A | No change                                                                                                                                                  |
| 12. | Patient with risk factors for myopathy is NOT taking                                                               | 7 | D | 3.00,<br>4.60 | A | Patient with risk factors for statin induced myopathy is                                                               | 8 | A | 1.10,<br>7.52 | A | The use of all high dose high potency statins together with                                                                                                |

|     |                                                                                                                         |   |   |            |   |                                                                                                                                           |   |   |            |   |                                                                                                                                                                                                                                          |
|-----|-------------------------------------------------------------------------------------------------------------------------|---|---|------------|---|-------------------------------------------------------------------------------------------------------------------------------------------|---|---|------------|---|------------------------------------------------------------------------------------------------------------------------------------------------------------------------------------------------------------------------------------------|
|     | 40mg or more per day of simvastatin or atorvastatin                                                                     |   |   |            |   | not taking a high dose of a high potency statin                                                                                           |   |   |            |   | risk factors may increase the likelihood of myopathy[50 ,67 ,68]                                                                                                                                                                         |
| 13. | Patient with cardiovascular disease is NOT taking an NSAID                                                              | 7 | A | 1.20, 5.95 | A | Patient with cardiovascular disease is NOT taking an NSAID                                                                                | 8 | A | 1.10, 6.18 | A | No change                                                                                                                                                                                                                                |
| 14. | Patient with cardiovascular, respiratory disease or diabetes who smokes has been offered smoking cessation therapy      | 9 | A | 0.00, 8.35 | A | Patient with cardiovascular, respiratory disease or diabetes who smokes has been offered smoking cessation options                        | 9 | A | 0.00, 8.35 | A | “Therapy” implies pharmacotherapy, whereas repeated counselling/psychotherapy may be preferred to avoid the risks associated with polypharmacy                                                                                           |
| 15. | Patient with type 2 diabetes and hypertension and albuminuria is taking an ACEI or A2A                                  | 8 | A | 2.00, 6.85 | A | Patient with type 2 diabetes and hypertension and albuminuria is taking an ACEI or A2A                                                    | 9 | A | 1.00, 7.60 | A | No change.                                                                                                                                                                                                                               |
| 16. | Patient with diabetes at high risk of a cardiovascular event is taking an antiplatelet agent unless on an anticoagulant | 7 | D | 2.20, 5.50 | A | Patient with diabetes at high risk of a cardiovascular event is taking an antiplatelet agent unless on an anticoagulant                   | 9 | A | 1.00, 7.60 | A | No change                                                                                                                                                                                                                                |
| 17. | Patient with diabetes is NOT taking a medication which may increase or decrease blood glucose concentrations            | 5 | D | 2.20, 3.70 | A | Patient with diabetes receiving medications that may affect glycemic control is having regular monitoring of blood glucose concentrations | 9 | A | 1.00, 7.60 | A | Increased awareness and monitoring may require adjustment of hypoglycemic medication doses, depending upon the need to continue interacting medicines. For example, commencement of oral corticosteroids may worsen diabetes control[43] |
| 18. | Patient with diabetes has had an HbA1c measurement within the previous 6 months                                         | 8 | A | 1.20, 7.45 | A | Patient with diabetes has had an HbA1c measurement within the previous 6 months                                                           | 8 | A | 1.00, 7.60 | A | No change                                                                                                                                                                                                                                |
| 19. | Patient taking metformin for diabetes has had the dose adjusted for                                                     | 8 | A | 1.20, 7.45 | A | Patient taking metformin for diabetes has had the dose adjusted for renal function                                                        | 9 | A | 1.00, 7.60 | A | Creatinine clearance may represent only one of the methods used to determine                                                                                                                                                             |

|     |                                                                                                         |   |      |            |   |                                                                                                                       |   |   |            |   |                                                                                                                                                                                                                                |
|-----|---------------------------------------------------------------------------------------------------------|---|------|------------|---|-----------------------------------------------------------------------------------------------------------------------|---|---|------------|---|--------------------------------------------------------------------------------------------------------------------------------------------------------------------------------------------------------------------------------|
|     | creatinine clearance                                                                                    |   |      |            |   |                                                                                                                       |   |   |            |   | renal function                                                                                                                                                                                                                 |
| 20. | Patient taking metformin for diabetes is NOT concurrently taking glibenclamide                          | 6 | D    | 2.40, 3.85 | A | Deleted                                                                                                               | - |   | -          | - | Glibenclamide is an uncommonly used hypoglycaemic                                                                                                                                                                              |
| 21. | Patient with OA pain interfering with daily activities has been trialled on paracetamol 2 – 4 g per day | 8 | A    | 2.00, 6.85 | A | Patient with OA pain interfering with daily activities has been trialled on regular paracetamol 2 – 4 g per day       | 9 | A | 0.40, 8.05 | A | “Regular” paracetamol added to improve quality of indicator                                                                                                                                                                    |
| 22. | Patient taking analgesic(s) does NOT have pain that interferes with daily activities                    | 7 | D    | 3.2, 4.75  | A | Patient taking analgesic(s) has had the dose(s) titrated in order to avoid pain that interferes with daily activities | 8 | A | 2.00, 6.85 | A | Indicator rephrased to improve clarity                                                                                                                                                                                         |
| 23. | Patient taking an opioid is on prophylactic treatment for constipation                                  | 8 | A    | 2.00, 6.85 | A | Patient taking a regular opioid is on prophylactic treatment for constipation                                         | 9 | A | 1.00, 7.60 | A | “Regular” use added as “when required” use may not always require prophylactic treatment                                                                                                                                       |
| 24. | Patient with risk factors for impaired renal function is NOT taking an NSAID                            | 8 | A    | 1.00, 7.60 | A | Patient with risk factors for impaired renal function is NOT taking an NSAID                                          | 8 | A | 1.00, 7.60 | A | No change                                                                                                                                                                                                                      |
| 25. | Patient is NOT concurrently taking an ACEI or A2A, diuretic and NSAID (excluding low dose aspirin)      | 9 | A    | 1.00, 7.60 | A | Patient is NOT concurrently taking an ACEI or A2A, diuretic and NSAID (excluding low dose aspirin)                    | 9 | A | 1.00, 7.60 | A | No change                                                                                                                                                                                                                      |
| 26. | Patient with sleep disturbance or anxiety has NOT been taking benzodiazepines for > 4 weeks             | 8 | A    | 1.20, 7.45 | A | Patient has NOT been taking benzodiazepines for > 4 weeks                                                             | 9 | A | 1.00, 7.60 | A | “Sleep disturbance or anxiety” deleted. Benzodiazepines increase the risk of oversedation, ataxia, confusion, falls, respiratory depression and short-term memory impairment, and are recommended for short term use only[43]. |
| 27. | Patient with depression is NOT taking                                                                   | 7 | 7, D | 1.00, 4.60 | A | Deleted                                                                                                               | - |   | -          | - | The issue of anticholinergic burden is addressed by                                                                                                                                                                            |

|     |                                                                                                               |   |   |            |   |                                                                                                                 |   |   |            |   |                                                                                                 |
|-----|---------------------------------------------------------------------------------------------------------------|---|---|------------|---|-----------------------------------------------------------------------------------------------------------------|---|---|------------|---|-------------------------------------------------------------------------------------------------|
|     | anticholinergic type antidepressants                                                                          |   |   |            |   |                                                                                                                 |   |   |            |   | indicator 32                                                                                    |
| 28. | Patient with a history of falls is NOT taking psychotropic medications                                        | 8 | A | 1.00, 6.10 | A | Patient with a history of falls is NOT taking psychotropic medications                                          | 8 | A | 1.40, 6.40 | A | No change                                                                                       |
| 29. | Patient taking an SSRI is NOT concurrently taking medications known to increase the risk of GI bleeding       | 7 | D | 2.20, 5.20 | A | Deleted                                                                                                         | - |   | -          | - | Redundant indicator. This issue would be identified by indicator 47.                            |
| 30. | Patient taking an SSRI is NOT concurrently taking other medications that may contribute to serotonin toxicity | 8 | A | 2.20, 6.70 | A | Patient taking an SSRI is NOT concurrently taking other medications that may contribute to serotonin toxicity   | 8 | A | 1.40, 6.40 | A | No change. Retained by panel due to its potential significance, despite the use of indicator 47 |
| 31. | Patient with dementia is NOT receiving anticholinergic medication                                             | 8 | A | 1.20, 7.45 | A | Patient with dementia is NOT receiving anticholinergic medication                                               | 8 | A | 1.00, 7.60 | A | No change                                                                                       |
| 32. | Patient is NOT taking more than one medication with anticholinergic activity                                  | 8 | A | 0.2, 6.70  | A | Patient is not taking medication with SIGNIFICANT anticholinergic activity                                      | 8 | A | 0.40, 7.15 | A | Rewording focuses on the issue of anticholinergic burden                                        |
| 33. | Patient taking a PPI is NOT taking a medication that may cause dyspepsia                                      | 7 | D | 3.20, 4.45 | A | Patient taking a PPI is NOT taking a medication that may cause dyspepsia unless prescribed for gastroprotection | 8 | A | 0.40, 7.15 | A | “Unless prescribed for gastroprotection” added to improve the accuracy of the indicator         |
| 34. | Patient with COPD is NOT taking benzodiazepines                                                               | 7 | D | 3.00, 6.10 | A | Patient with COPD is NOT taking benzodiazepines                                                                 | 8 | A | 1.00, 6.10 | A | No change                                                                                       |
| 35. | Patient with asthma using an inhaled LABA is also using an inhaled corticosteroid                             | 9 | A | 0.20, 8.20 | A | Patient with asthma using an inhaled LABA is also using an inhaled corticosteroid                               | 9 | A | 1.00, 7.60 | A | No change                                                                                       |
| 36. | Patient using salbutamol or terbutaline inhaler more                                                          | 9 | A | 1.00, 7.60 | A | Patient using salbutamol or terbutaline inhaler more than                                                       | 9 | A | 0.40, 8.05 | A | “Except for exercise-induced asthma” added to improve the                                       |



|     |                                                                                                                                                 |   |      |            |   |                                                                                                                 |   |   |            |   |                                                                                                                          |
|-----|-------------------------------------------------------------------------------------------------------------------------------------------------|---|------|------------|---|-----------------------------------------------------------------------------------------------------------------|---|---|------------|---|--------------------------------------------------------------------------------------------------------------------------|
|     | than 3 times per week for reversible airways disease has been prescribed an ICS                                                                 |   |      |            |   | 3 times per week for reversible airways disease has been prescribed an ICS (except for exercise-induced asthma) |   |   |            |   | accuracy of the indicator                                                                                                |
| 37. | Patient with asthma is NOT taking a medication that may worsen asthma                                                                           | 7 | A    | 1.20, 6.25 | A | Patient with asthma is NOT taking a medication that may worsen asthma                                           | 8 | A | 1.00, 7.60 | A | No change                                                                                                                |
| 38. | Female patient with recurrent UTIs has been prescribed intravaginal estrogen                                                                    | 5 | D    | 2.00, 3.85 | A | Deleted                                                                                                         | - |   | -          | - | Evidence for this indicator was judged to be poor[69]                                                                    |
| 39. | Patient with a creatinine clearance < 60 ml/min is NOT receiving nitrofurantoin for UTI                                                         | 8 | A    | 2.00, 6.85 | A | Patient with a UTI is not receiving nitrofurantoin or hexamine for prophylaxis or acute treatment               | 8 | A | 1.00, 7.60 | A | Hexamine and nitrofurantoin are not recommended for the prophylactic or acute treatment of UTI in older patients[43 ,50] |
| 40. | Patient with a creatinine clearance < 50ml/min is NOT receiving hexamine for UTI prophylaxis                                                    | 8 | A    | 1.20, 6.25 | A | Deleted                                                                                                         | - | - | -          | - | Hexamine and are not recommended for the prophylactic treatment of UTI in older patients[43 ,50].                        |
| 41. | Patient with an URTI is NOT receiving antibiotics                                                                                               | 7 | 7, D | 3.00, 4.60 | A | Patient with a non-specific URTI is NOT receiving antibiotics                                                   | 8 | A | 1.00, 7.60 | A | “non-specific” added to improve the accuracy of the indicator                                                            |
| 42. | Patient with osteoporosis who is not receiving at least 600 IU Vitamin D daily from dietary sources is receiving supplementation with vitamin D | 8 | D    | 3.20, 4.75 | A | Deleted                                                                                                         | - |   | -          | - | This indicator is covered by indicator 44 and an expanded footnote                                                       |
| 43. | Patient with osteoporosis who is not receiving at least 1200 mg of calcium daily from dietary sources is receiving calcium                      | 8 | A    | 1.60, 5.95 | A | Deleted                                                                                                         | - |   | -          | - | This indicator is covered by indicator 44 and an expanded footnote                                                       |

1  
2  
3  
4  
5  
6  
7  
8  
9  
10  
11  
12  
13  
14  
15  
16  
17  
18  
19  
20  
21  
22  
23  
24  
25  
26  
27  
28  
29  
30  
31  
32  
33  
34  
35  
36  
37  
38  
39  
40  
41  
42  
43  
44  
45  
46  
47  
48  
49

|     |                                                                                                                    |   |   |            |   |                                                                                                                                                 |   |   |            |   |                                                                                                                                                                                                                                                                                                                                           |
|-----|--------------------------------------------------------------------------------------------------------------------|---|---|------------|---|-------------------------------------------------------------------------------------------------------------------------------------------------|---|---|------------|---|-------------------------------------------------------------------------------------------------------------------------------------------------------------------------------------------------------------------------------------------------------------------------------------------------------------------------------------------|
|     | supplementation                                                                                                    |   |   |            |   |                                                                                                                                                 |   |   |            |   |                                                                                                                                                                                                                                                                                                                                           |
| 44. | Patient with osteoporosis is receiving anti-osteoporotic medication                                                | 7 | A | 1.00, 6.10 | A | Patient with osteoporosis is receiving appropriate anti-osteoporotic medication                                                                 | 8 | A | 0.40, 7.15 | A | “Appropriate” added and an expanded footnote to include calcium and vitamin D                                                                                                                                                                                                                                                             |
| 45. | Patient using topical corticosteroids does NOT have itch or discomfort that interferes with daily activities       | 6 | D | 2.00, 5.35 | A | Patient using topical corticosteroids for contact or allergic dermatitis does not have itch or discomfort that interferes with daily activities | - |   | -          | - | This indicator was deleted by the panel because there was no identification of the diagnosis/condition being treated. However, contact and allergic dermatitis is one of the top 40 most frequently managed problems by general practitioners in patients ≥ 65 years old in Australia,[40] so this indicator was re-worded by the authors |
| 46. | Patient has received influenza and pneumococcal vaccination                                                        | 9 | A | 1.00, 7.60 | A | Patient has received influenza and pneumococcal vaccination                                                                                     | 9 | A | 0.00, 8.35 | A | No change                                                                                                                                                                                                                                                                                                                                 |
| 47. | Patient has no <i>significant</i> medication interactions (agreement between two medication interaction databases) | 8 | D | 3.00, 6.10 | A | Patient has no <i>clinically significant</i> medication interactions (agreement between two medication interaction databases)                   | 8 | A | 0.40, 7.15 | A | “Clinically” added to improve the accuracy of the indicator                                                                                                                                                                                                                                                                               |
| 48. | Patient has had no <i>significant</i> change in medications in the previous 90 days                                | 5 | D | 1.20, 3.25 | A | Deleted                                                                                                                                         | - |   | -          | - | It was preferred to transfer this information to the explanatory text of the article                                                                                                                                                                                                                                                      |
| New |                                                                                                                    |   |   |            |   | Patient taking thyroid hormone replacement therapy has had a serum TSH measurement within the previous 12 months                                |   |   |            |   | Thyroid disease is a common medical condition managed by GPs in older Australians[40,70]                                                                                                                                                                                                                                                  |
| New |                                                                                                                    |   |   |            |   | Patient with coronary heart disease is taking an ACEI or A2A                                                                                    |   |   |            |   | ACEIs or A2As reduce the risk of cardiovascular events[71,72]. However, a high incidence of comorbid disease                                                                                                                                                                                                                              |

1  
2  
3  
4  
5  
6  
7  
8  
9  
10  
11  
12  
13  
14  
15  
16  
17  
18  
19  
20  
21  
22  
23  
24  
25  
26  
27  
28  
29  
30  
31  
32  
33  
34  
35  
36  
37  
38  
39  
40  
41  
42  
43  
44  
45  
46  
47  
48  
49

|  |  |  |  |  |  |  |  |  |  |  |  |                                                                                                                                                                                                                                       |
|--|--|--|--|--|--|--|--|--|--|--|--|---------------------------------------------------------------------------------------------------------------------------------------------------------------------------------------------------------------------------------------|
|  |  |  |  |  |  |  |  |  |  |  |  | in CHD (commonly arthritis or respiratory disease) or other clinical factors (e.g. dizziness or falls, cognitive impairment, use of > 5 medicines, patient preference) may be more important in determining medication priorities[73] |
|--|--|--|--|--|--|--|--|--|--|--|--|---------------------------------------------------------------------------------------------------------------------------------------------------------------------------------------------------------------------------------------|

<sup>1</sup> **IPRAS = interpercentile range adjusted for symmetry. IPR = interpercentile range**  
 ACEI = angiotensin converting enzyme inhibitor, AF = atrial fibrillation, A2A = angiotensin 2 receptor antagonist, CHD = coronary heart disease, COPD = chronic obstructive pulmonary disease, HF-LVSD = Heart failure with left ventricular systolic dysfunction, HFPEF = Heart failure with preserved ejection fraction, HbA1c = glycosylated haemoglobin, ICS = inhaled corticosteroid, LABA = long acting beta antagonist, MI = myocardial infarct, NSAID = non-steroidal anti-inflammatory drug, OA = osteoarthritis, PPI = proton pump inhibitor, SSRI = selective serotonin reuptake inhibitor, Statin = HMG-CoA reductase inhibitor, TIA = transient ischemic attack, UTI = urinary tract infection, URTI = upper respiratory tract infection

**Table 2 Table 3** Validated prescribing appropriateness criteria for older Australians ( $\geq 65$  years) for commonly used medications and medical conditions <sup>a,b,c</sup> (\*for usage information for certain criteria, see **Table 3 Table 4**)

| Criteria No. | Validated criteria                                                                                                                                                        |
|--------------|---------------------------------------------------------------------------------------------------------------------------------------------------------------------------|
| 1            | Patient taking an antihypertensive is at the target blood pressure appropriate for them*                                                                                  |
| 2            | Patient at high risk of a recurrent cardiovascular event is taking a statin*                                                                                              |
| 3            | Patient with CHD or a history of MI is taking a beta blocker                                                                                                              |
| 4            | Patient with CHD or a history of MI is taking an antiplatelet agent unless taking an oral anticoagulant*                                                                  |
| 5            | Patient with CHD is taking an ACEI or A2A*                                                                                                                                |
| 6            | Patient with stable heart failure with HF-LVSD is taking a beta blocker                                                                                                   |
| 7            | Patient with stable heart failure with HF-LVSD is taking an ACEI or A2A*                                                                                                  |
| 8            | Patient with HF-LVSD or HFPEF is NOT taking medications which may exacerbate heart failure                                                                                |
| 9            | Patient with AF is taking an oral anticoagulant or an antiplatelet agent, depending upon stroke risk and bleeding risk*                                                   |
| 10           | Patient taking warfarin for AF has an INR between 2-3                                                                                                                     |
| 11           | Patient with a history of non-hemorrhagic stroke or TIA is taking an antiplatelet agent unless taking an anticoagulant                                                    |
| 12           | Patient with risk factors for statin induced myopathy is not taking a high dose of a high potency statin*                                                                 |
| 13           | Patient with cardiovascular disease is NOT taking an NSAID                                                                                                                |
| 14           | Patient with cardiovascular, respiratory disease or diabetes who smokes has been offered smoking cessation options*                                                       |
| 15           | Patient with type 2 diabetes and hypertension and albuminuria is taking an ACEI or A2A                                                                                    |
| 16           | Patient with diabetes at high risk of a cardiovascular event is taking an antiplatelet agent unless on an anticoagulant                                                   |
| 17           | Patient with diabetes taking medications that may affect glycemic control is receiving regular monitoring of blood glucose concentrations*                                |
| 18           | Patient with diabetes has had an HbA1c measurement within the previous 6 months*                                                                                          |
| 19           | Patient taking metformin for diabetes has had the dose adjusted for renal function*                                                                                       |
| 20           | Patient taking thyroid hormone replacement therapy has had a serum TSH measurement within the previous 12 months                                                          |
| 21           | Patient with OA pain interfering with daily activities has been trialled on regular paracetamol 2 – 4 g per day                                                           |
| 22           | Patient taking analgesic(s) has had the dose(s) titrated in order to avoid pain that interferes with daily activities                                                     |
| 23           | Patient taking a regular opioid is on prophylactic treatment for constipation                                                                                             |
| 24           | Patient with risk factors for impaired renal function is NOT taking an NSAID*                                                                                             |
| 25           | Patient is NOT concurrently taking an ACEI or A2A, diuretic and NSAID (excluding low dose aspirin)                                                                        |
| 26           | Patient has NOT been taking benzodiazepines for > 4 weeks*                                                                                                                |
| 27           | Patient with a history of falls is NOT taking psychotropic medications*                                                                                                   |
| 28           | Patient taking an SSRI is NOT concurrently taking other medications that may contribute to serotonin toxicity*                                                            |
| 29           | Patient with dementia is NOT receiving anticholinergic medication*                                                                                                        |
| 30           | Patient is not taking medication with SIGNIFICANT anticholinergic activity*                                                                                               |
| 31           | Patient taking a PPI is NOT taking a medication that may cause dyspepsia unless prescribed for gastroprotection*                                                          |
| 32           | Patient with COPD is NOT taking benzodiazepines                                                                                                                           |
| 33           | Patient with asthma using an inhaled LABA is also using an inhaled corticosteroid                                                                                         |
| 34           | Patient using salbutamol or terbutaline inhaler more than 3 times per week for reversible airways disease has been prescribed an ICS (except for exercise-induced asthma) |
| 35           | Patient with asthma is NOT taking a medication that may worsen asthma*                                                                                                    |
| 36           | Patient with a UTI is not receiving nitrofurantoin or hexamine for prophylaxis or acute treatment                                                                         |
| 37           | Patient with a non-specific URTI is NOT receiving antibiotics*                                                                                                            |
| 38           | Patient with osteoporosis is receiving appropriate anti-osteoporotic medication*                                                                                          |

|    |                                                                                                                                                 |
|----|-------------------------------------------------------------------------------------------------------------------------------------------------|
| 39 | Patient has received influenza and pneumococcal vaccination                                                                                     |
| 40 | Patient using topical corticosteroids for contact or allergic dermatitis does not have itch or discomfort that interferes with daily activities |
| 41 | Patient has no <i>clinically significant</i> medication interactions (agreement between two medication interaction databases)*                  |

a – These criteria are intended to be used by appropriately trained and qualified health professionals, as a tool to assist in making medication management decisions as part of the medication review process

b – Prior to the commencement of any medication, the contraindications and precautions for that medication should be considered

c – The intended result of using these criteria is the reasonable and appropriate medication management of individual patients, rather than the systematic application of these criteria to all patients irrespective of other considerations

A2A = angiotensin 2 receptor antagonist, ACEI = angiotensin converting enzyme inhibitor, AF = atrial fibrillation, CHD = coronary heart disease, COPD = chronic obstructive pulmonary disease, HbA1c = glycosylated haemoglobin, HF-LVSD = Heart failure with left ventricular systolic dysfunction, HFPEF = heart failure with preserved ejection fraction, ICS = inhaled corticosteroid, INR = international normalised ratio, MI = myocardial infarct, LABA = long acting beta agonist, NSAID = non-steroidal anti-inflammatory drug, PPI = proton pump inhibitor, SSRI = selective serotonin reuptake inhibitor, TIA = transient ischemic attack, TSH = thyroid stimulating hormone, UTI = urinary tract infection.

**Table 3** **Table 4** Criteria usage information

| Criteria No. | Description of issue                                                            | Details                                                                                                                                                                                                                                                                                                                                                                                                                                                                                              |
|--------------|---------------------------------------------------------------------------------|------------------------------------------------------------------------------------------------------------------------------------------------------------------------------------------------------------------------------------------------------------------------------------------------------------------------------------------------------------------------------------------------------------------------------------------------------------------------------------------------------|
| 1            | Blood pressure targets (mm Hg)                                                  | Proteinuria >1 g/day (with or without diabetes) < 125/75. CHD, diabetes, chronic kidney disease, proteinuria (> 300mg/day), stroke or TIA < 130/80. Others <140/90[43] Current blood pressure guidelines may not be appropriate for all older patients, such as the oldest old; in palliative care; and for those who are/become hypotensive and/or fall[48 ,50-53 ,74]                                                                                                                              |
| 2            | Patients at high risk of a cardiovascular event (> 15% within the next 5 years) | Age > 75 years; history of diabetes, moderate or severe chronic kidney disease (persistent proteinuria, GFR < 60ml/min, eGFR < 45 ml/min/1.73m <sup>2</sup> ), hypercholesterolemia (familial, TC > 7.5 mmol/L), SBP ≥ 180 or DBP ≥ 110 mmHg, ISH (SBP ≥160 and DBP ≤70 mmHg), coronary heart disease, stroke, TIA, PAD, heart failure, aortic disease, LVH, family history of premature CVD.[43 ,75] The benefits of statins and risks of adverse effects are uncertain towards the end of life[76] |
| 4            | Antiplatelet agents and oral anticoagulants                                     | Antiplatelet agents – aspirin, clopidogrel, dipyridamole, ticlopidine. Oral anticoagulants – dabigatran, phenindione, rivaroxaban, warfarin                                                                                                                                                                                                                                                                                                                                                          |
| 5            | Use of ACEI or A2A in CHD                                                       | A high incidence of comorbid disease in CHD (typically arthritis and/or respiratory disease) or other clinical factors (e.g. dizziness or falls, cognitive impairment, use of > 5 medicines, patient preference) may be considerations in determining medication prescribing priorities[23 ,27 ,73]                                                                                                                                                                                                  |
| 7            | Medications that may exacerbate heart failure                                   | HF-LVSD – anti-arrhythmic medicines (except for heart failure-specific beta-blockers and amiodarone), non-dihydropyridine calcium-channel blockers (e.g. verapamil or diltiazem), clozapine, corticosteroids, NSAIDs (excluding low dose aspirin), thiazolidinediones, TNF-alpha inhibitors, topical beta blockers (when added to systemic beta blockers), tricyclic antidepressants[50 ,77 ,78]. HFPEF – venodilators (e.g. isosorbide dinitrate), potent arterial                                  |

|           |                                                                     |                                                                                                                                                                                                                                                                                                                                                                                                                                                                    |
|-----------|---------------------------------------------------------------------|--------------------------------------------------------------------------------------------------------------------------------------------------------------------------------------------------------------------------------------------------------------------------------------------------------------------------------------------------------------------------------------------------------------------------------------------------------------------|
|           |                                                                     | vasodilators (e.g. hydralazine), digoxin (unless AF), excessive use of diuretics. Note; verapamil and diltiazem may improve diastolic function in HFPEF[61]                                                                                                                                                                                                                                                                                                        |
| 9         | Stroke risk and bleeding risk                                       | Stroke risk can be calculated using CHADS <sub>2</sub> or CHA <sub>2</sub> DS <sub>2</sub> -VASc.[79] Risk factors for coumarin-related bleeding complications: advanced age, uncontrolled hypertension, history of MI or IHD, cerebrovascular disease, anaemia or a history of bleeding, concomitant use of aspirin/polypharmacy[80]                                                                                                                              |
| 12        | Risk factors for statin myopathy; high dose of high potency statins | Age > 70 years, presence of disease states (diabetes, hypothyroidism, renal and hepatic disease), concurrent use of cyclosporin, fibrates, CYP3A4 inhibitors (e.g. diltiazem, macrolides, protease inhibitors, verapamil [except for pravastatin and rosuvastatin], severe intercurrent illness (infection, trauma, metabolic disorder), dose ≥ 40 mg daily. High dose of high potency statins ; ≥ 40 mg atorvastatin or simvastatin; > 10mg rosuvastatin [43 ,81] |
| 14        | Smoking cessation options                                           | Counselling (extended, brief, telephone), support services (professional, family, social, work), pharmacotherapy.                                                                                                                                                                                                                                                                                                                                                  |
| 17        | Medications that may affect glycemic control                        | Increase blood glucose: baclofen, clozapine, cyclosporin, glucocorticoids, haloperidol, olanzapine, paliperidone, phenytoin, protease inhibitors, quetiapine, risperidone, sirolimus, tacrolimus, and tricyclic antidepressants. Decrease blood glucose: excessive alcohol, disopyramide, perhexiline, quinine, trimethoprim/sulphamethoxazole[43]                                                                                                                 |
| 18        | Six monthly HbA1c measurements                                      | Treatment intensification in response to less than optimally controlled HbA1c may be inappropriate in patients with limited life expectancy or in frail older patients[82 ,83]                                                                                                                                                                                                                                                                                     |
| 19        | Metformin dose                                                      | Based on creatinine clearance: 60-90 ml/min, maximum 2g daily; 30-60 ml/min, maximum 1g daily; < 30 ml/min avoid use.[43] Based on eGFR: Review dose if eGFR< 45 ml/min/1.73m <sup>2</sup> ; avoid if eGFR<30 ml/min/1.73m <sup>2</sup> [84]                                                                                                                                                                                                                       |
| 24        | Risk factors for impaired renal function                            | Volume depletion, age > 60 years, salt-restricted diet, concomitant use of ACEIs, A2As, cyclosporin or aspirin, GFR ≤ 60 ml/min, cirrhosis, heart failure[85]                                                                                                                                                                                                                                                                                                      |
| 26        | Benzodiazepine use                                                  | Benzodiazepines increase the risk of oversedation, ataxia, confusion, falls, respiratory depression and short-term memory impairment, and are recommended for short term use only.[43]                                                                                                                                                                                                                                                                             |
| 27        | Falls and psychotropic medications                                  | Psychotropic medications = antidepressants (all), anxiolytics/hypnotics, antipsychotics.[86 ,87] Medications causing (postural) hypotension (e.g. cardiovascular medicines) or cognitive impairment (e.g. opioids) may also increase the risk of falls[50 ,88]                                                                                                                                                                                                     |
| 28        | Medications that may contribute to serotonin syndrome               | Antidepressants - desvenlafaxine, duloxetine, St John's wort, MAOIs (including moclobemide), SSRIs, TCAs, venlafaxine. Opioids - dextromethorphan, fentanyl, pethidine, tramadol. Others - selegiline, linezolid, lithium, tryptophan[43]                                                                                                                                                                                                                          |
| 29 and 30 | Medications with significant anticholinergic activity               | amantadine, amitriptyline, atropine*, belladonna alkaloids*, benzhexol, benzotropine, biperiden, brompheniramine*, chlorpheniramine, chlorpromazine, clomipramine, clozapine, cyclizine, cyclopentolate, cyproheptadine*, darifenacin, dexchlorpheniramine*, dimenhydrinate*, diphenhydramine*, disopyramide, dothiepin, doxepin, glycopyrrolate,                                                                                                                  |



|    |                                                |                                                                                                                                                                                                                                                                                                                                                                                                                                                                                                                                                                                                                                                                                                                                                                                                                                                                                                                                                                                                                                                          |
|----|------------------------------------------------|----------------------------------------------------------------------------------------------------------------------------------------------------------------------------------------------------------------------------------------------------------------------------------------------------------------------------------------------------------------------------------------------------------------------------------------------------------------------------------------------------------------------------------------------------------------------------------------------------------------------------------------------------------------------------------------------------------------------------------------------------------------------------------------------------------------------------------------------------------------------------------------------------------------------------------------------------------------------------------------------------------------------------------------------------------|
|    |                                                | homatropine, hyoscine* (butylbromide or hydrobromide), imipramine, ipratropium (nebulised), mianserin, nortriptyline, olanzapine, orphenadrine, oxybutynin, pericyazine, pheniramine*, pimozone, pizotifen, prochlorperazine, promethazine*, propantheline, solifenacin, tiotropium, tolterodine, trimeprazine*, trimipramine, triprolidine*, tropicamide (* available over-the-counter in Australia)[43]                                                                                                                                                                                                                                                                                                                                                                                                                                                                                                                                                                                                                                                |
| 31 | Medications that may cause dyspepsia           | Drugs with anticholinergic effects, aspirin, benzodiazepines, bisphosphonates, calcium channel antagonists, oral corticosteroids, dopaminergic drugs, doxycycline, erythromycin, ferrous sulphate, nitrates, NSAIDs, potassium chloride (slow release)[42,43,50,89]                                                                                                                                                                                                                                                                                                                                                                                                                                                                                                                                                                                                                                                                                                                                                                                      |
| 35 | Medications that may worsen asthma             | Aspirin, beta blockers (including eye drops), carbamazepine, echinacea, NSAIDs, royal jelly[43,90]                                                                                                                                                                                                                                                                                                                                                                                                                                                                                                                                                                                                                                                                                                                                                                                                                                                                                                                                                       |
| 38 | Non-specific URTI                              | Acute bronchitis, pharyngitis, tonsillitis, nonsuppurative otitis media and sinusitis[42]                                                                                                                                                                                                                                                                                                                                                                                                                                                                                                                                                                                                                                                                                                                                                                                                                                                                                                                                                                |
| 39 | Appropriate anti-osteoporotic medication       | Recommended daily intake (RDI) of calcium from dietary sources and/or supplements = 1300-1500 mg daily. RDI for Vitamin D from sunlight and/or dietary sources and/or supplements = 600 iu daily. Anti-osteoporotic medication = bisphosphonates, calcitriol, denosumab, HRT, raloxifene, strontium, teriparatide.[43] Evidence for fracture risk reduction in women $\geq 75$ years is either absent or lacking in NVF for alendronate, risedronate and teriparatide, and in HF for alendronate, risedronate, zoledronic acid and teriparatide. There is no data available for denosumab in VF, NVF or HF.[91] The optimal duration of bisphosphonate therapy is uncertain. Evidence supports the use of strontium for 5 years, raloxifene for 4 years, zoledronic acid and denosumab for 3 years. Exposure to teriparatide should be limited to 18 months.[92] Data are limited for non-ambulatory patients and those with significant comorbidities.[93] It should be noted that bone strength is only one of many determinants of fracture risk.[94] |
| 42 | Clinically significant medication interactions | Medication interactions that may interfere with the outcome of therapy                                                                                                                                                                                                                                                                                                                                                                                                                                                                                                                                                                                                                                                                                                                                                                                                                                                                                                                                                                                   |

A2A = angiotensin 2 receptor antagonist, ACE = angiotensin converting enzyme, ACEI = angiotensin converting enzyme inhibitor, AF = atrial fibrillation, CHADS<sub>2</sub> = Cardiac failure, Hypertension, Age, Diabetes, Stroke [doubled], CHA<sub>2</sub>DS<sub>2</sub>-VASc = Cardiac failure or dysfunction, Hypertension, Age over 75 years [doubled], Diabetes, Stroke [doubled], Vascular disease, Age 65-74 years, Sex category [female], CHD = coronary heart disease, CVD = cardiovascular disease, DBP = diastolic blood pressure, GFR = glomerular filtration rate, HF = hip fracture, HF-LVSD = Heart failure with left ventricular systolic dysfunction, HFPEF = heart failure with preserved ejection fraction, HRT = hormone replacement therapy, IHD = ischemic heart disease, ISH = isolated systolic hypertension, LVH = left ventricular hypertrophy, MAOI = monoamine oxidase inhibitor, MI = myocardial infarct, NSAID = non-steroidal anti-inflammatory drug, NVF = non-vertebral fracture, PAD = peripheral arterial disease, SBP = systolic blood pressure, SSRI = selective serotonin reuptake inhibitor, TC = total cholesterol, TCA = tricyclic antidepressant, TIA = transient ischemic attack, TNF = tumour necrosis factor, URTI = upper respiratory tract infection, VF = vertebral fracture

## DISCUSSION

This study identified a panel of medication management experts to discuss and validate a set of 41 prescribing appropriateness criteria for commonly used medicines and medical conditions in older ( $\geq 65$  years) Australians. Panel discussion resulted in retention of **39.81%**

1  
2  
3 | (~~39/48~~) of the originally proposed 48 criteria, with ~~a little over half 25 (25/48)~~ being  
4 | reworded. These criteria do not simply represent a list of medications to avoid in the elderly,  
5 | but also address issues such as the need for additional therapy (e.g. criteria 23 and 34, ~~table~~  
6 | ~~2~~Table 3), additional tests (e.g. criteria 18-20, ~~table 2~~Table 3), ineffective treatment (e.g.  
7 | criteria 22 and 37, ~~table 2~~Table 3) and medication monitoring (e.g. criteria 10 and 20, ~~table~~  
8 | ~~2~~Table 3). They were designed to contribute to the Australian quality use of medicines  
9 | (QUM) process.[95]- The information required to apply these criteria may be obtained from a  
10 | variety of sources such as the patient or their pharmacist, or patient medical notes. [30] It may  
11 | also be provided by a Home Medicines Review referral form from the patients general  
12 | practitioner.[28] Due to ~~its~~ their currency and the nature of ~~its~~ their development, we expect  
13 | these criteria to make a significant contribution to the detection of DRPs in the Australian  
14 | healthcare environment. For example, in a review of prescribing indicators for two  
15 | conditions, [36] which are common in older people in Australia – type two diabetes and  
16 | cardiovascular disease [96 ,97] – disease and drug-orientated criteria such as ours have shown  
17 | good content, face, concurrent and predictive validity and operational feasibility, as well as  
18 | use for internal and external quality assessment in both ambulatory and hospital care.[36]  
19 | Evidence-practice gaps, which formed part of the developmental process for these criteria,  
20 | have identified deficiencies in the treatment of these and other areas such as vaccination,  
21 | asthma and pain.[6 ,98-101]  
22  
23  
24  
25  
26  
27

### 28 | **Prescribing appropriateness ~~lists~~ tools in Australia**

29  
30  
31 | Appropriateness of prescribing has been assessed by measures that are explicit or implicit, in  
32 | an effort to identify and reduce DRPs.[102] In Australia, both types of measures have been  
33 | used.[103-107]However, they have been imported into the Australian healthcare  
34 | environment, with consequent shortcomings related to both the intrinsic nature of the  
35 | measure, as well as environment compatibility issues. For example, in a study evaluating the  
36 | impact of home medicine reviews on appropriateness of prescribing, a significant number of  
37 | recommendations made regarding the need for monitoring and addition of missing therapy  
38 | were found to have no impact on explicitly derived scores using the Medication  
39 | Appropriateness Index,[103] due to the intrinsic shortcomings of this tool. This is not a tool  
40 | that gives precise guidance in relation to specific medicines.[13]  
41  
42  
43  
44

45 | The Beers criteria,[108] perhaps the tool most widely used to assess inappropriate prescribing  
46 | in older people, has been used in Australia, but with modifications to exclude medicines not  
47 | listed for government subsidy.[107] This is because medicine availability and use in Australia  
48 | is largely determined by the Australian Pharmaceutical Benefits Scheme[41]. Other  
49 | Australian studies have found that some medicines listed as inappropriate by Beers may be  
50 | appropriate for certain older people according to Australian practice:[105] many medicines  
51 | listed by Beers are not available in Australia; and that some medicines considered  
52 | inappropriate in Australia are not listed by Beers.[106]Disagreement between Beers and other  
53 | criteria, such as the improving prescribing in the elderly tool (IPET), have been  
54 | identified.[109]  
55  
56  
57  
58  
59  
60

1  
2  
3 The Beers criteria was recently updated,[110] with approximately half the medicines listed  
4 being unavailable in Australia. Further, almost three quarters of the diseases or syndromes  
5 listed are not among the forty problems most frequently managed in patients over sixty five  
6 years of age by Australian general practitioners.[97] Beers still contains recommendations to  
7 avoid some medicines that are recommended for certain older people in Australia such as  
8 amiodarone, and it has recently been shown that rhythm control in older patients with atrial  
9 fibrillation may be more effective than rate control in reducing mortality over the long-  
10 term.[111]. Reviews of explicit and implicit criteria have identified these and other problems  
11 such as; failure to address drug-drug interactions and drug duplication, errors in  
12 recommendations, underrepresentation of certain drug categories, inclusion of infrequently  
13 prescribed drugs, criteria that are inapplicable for all situations, disagreement between  
14 criteria, and lack of organisation of criteria.[37 ,102 ,112]

15  
16  
17  
18  
19  
20 This has resulted in the development by others of criteria more suited to their own particular  
21 healthcare environment.[113 ,114] Nationally based criteria have been described as the most  
22 desirable type of criteria, as they do not necessitate adaptation to local guidelines or national  
23 formularies before they can be used with confidence.[25 ,115]We therefore sought to  
24 construct and validate a set of prescribing appropriateness criteria relevant to the Australian  
25 healthcare environment. Our development process differed from most other tools[22 ,108  
26 ,113 ,114 ,116-119] as it did not initially involve a consensus panel, which has now been  
27 addressed. This development process also resulted in criteria unavailable in other tools such  
28 as monitoring, underprescribing, need for additional tests, evaluation of smoking and  
29 vaccination status, and certain drug interactions[25 ,37 ,102] Because we have generally  
30 named drug classes rather than specific drugs (Table 3), and targeted common medical  
31 conditions found in older patients.[120 ,121] we anticipate that our work may have some  
32 international usefulness.

33  
34  
35  
36  
37  
38 Despite a desire in Australia to develop decision support tools to improve healthcare  
39 quality,[122] progress has consisted of the development of a limited number of non-age  
40 specific structure and process indicator lists for use in hospitals and general practice.[44 ,123-  
41 125] ~~These Many of these~~ lists ~~require updating, like many others,~~ [25 ,114 ,126], ~~require~~  
42 ~~updating.~~ Currently, there is no Australian prescribing appropriateness criteria list to assist in  
43 improving medication management in older people. The usefulness of such an approach has  
44 been acknowledged, together with other approaches such as medication review.[127]

### 47 **Co-morbidity**

48  
49 Over 80% of older Australians have three or more chronic conditions,-[96] with Australian  
50 general practitioners shown to be dealing more frequently with patients presenting with three  
51 or four problems in the year 2009-10 compared with 2000-01.[128] Co-morbidity is  
52 associated with poor quality of life, physical disability, high health care use, multiple  
53 medicines with consequent increased risk of adverse drug events, fragmentation of care, and  
54 increased mortality.[121 ,129] Yet most Australian guidelines for chronic diseases do not  
55 modify or discuss the applicability of their recommendations to older patients with multiple  
56 comorbid conditions. [27] This situation is not restricted to Australia.-[129 ,130]Because the  
57  
58  
59  
60

1  
2  
3 risk of harm in older patients increases in proportion to the number of treatments prescribed,  
4 prioritization of therapeutic goals is necessary. For example, coronary heart disease (CHD) is  
5 an important co-morbidity in Australia[78 ,96] for which treatment with ACE inhibitors or  
6 angiotensin 2 antagonists has been recommended to reduce the risk of cardiovascular  
7 events.[71 ,72] Other criteria derived outside Australia such as STOPP/START do not  
8 include this recommendation. [22] However, the presence of co-morbidity in CHD  
9 (commonly arthritis or respiratory disease) or other clinical factors (such as dizziness, falls or  
10 patient preference) may be more important in determining medication priorities with respect  
11 to commencing these medicines (Table 4).[73] This Issues such as this may run counter to  
12 recommendations of disease-specific, evidence-based guidelines,-[27] and were not contained  
13 in our original set of criteria. They have been added (where possible) to increase relevance.  
14 Addition of our criteria with ~~its~~ this associated usage information (Table 4) to the implicit  
15 processes of ~~the~~ Australian medication review ~~process~~, may assist in addressing the~~is~~  
16 problem of comorbidity.

### 21 22 The Oldest Old

23  
24 Knowledge about the state of health and function of the oldest old is limited.[131] with  
25 research on their drug use being scarce, and often based on small and selected samples  
26 without comparison with other age groups.[132 ,133] We know that older patients in general  
27 are underrepresented in clinical trials, so that disease-specific guideline recommendations  
28 based on evidence may not apply to older cohorts.[27] For example, undertreatment with  
29 anti-osteoporotic medicines has been identified as a significant evidence-practice gap in  
30 Australia.[98] While STOPP/START criteria recommend calcium and vitamin D  
31 supplements.[22] no recommendations for more specific medicines are made. Further,  
32 evidence available for fracture risk reduction has been reported to differ with age.[91](Table  
33 4). Similarly, blood pressure targets appropriate for older patients may not be appropriate for  
34 the oldest old.[51] with adverse effects for antihypertensives found to be among the most  
35 frequent in centenarians.[134] We have attempted to achieve the advantages of using mostly  
36 explicit criteria, such as ease of application, with the addition of application information  
37 (Tables 2 and 4) unavailable in our previous criteria set.

### 38 39 Use of ~~t~~The RAND/UCLA appropriateness method

40  
41 We chose the RAND/UCLA appropriateness method, a two-round modified Delphi  
42 method[38] to select the most appropriate criteria. Unlike the Delphi method, which generally  
43 involves multiple questionnaire-driven rounds to obtain convergence of opinion, the RAND  
44 method involves an initial individual rating round, and a second face-to-face round. -This  
45 method has been shown to produce results that have face, construct and predictive  
46 validity.[46 ,135] Systematically combining available evidence with expert opinion can  
47 create quality criteria where best evidence may be lacking.[47]

48  
49 While most lists of prescribing criteria are based on expert consensus, this has often been  
50 achieved through mail surveys rather than face-to-face meetings.[25 ,36 ,37] Although face-  
51 to-face meetings restrict panel size, they allow discussion to resolve misinterpretations,  
52  
53  
54  
55  
56  
57  
58  
59  
60

1  
2  
3 introduce new evidence, and improve clarity of criteria between rating rounds. We ensured  
4 our panel comprised different specialities, as less disagreement has been found among same-  
5 speciality panels.[45] We addressed concern regarding potential intimidation due to dominant  
6 panel personalities by choosing a moderator experienced in the development of these criteria  
7 and in facilitating small group discussion. Diversity of medication and disease management  
8 issues may have minimized professional, but not personal, conflict-of-interest issues. We  
9 used both the median panel rating and the amount of dispersion of panel ratings to identify  
10 agreement or disagreement. While it has been acknowledged that discrepancies between the  
11 two methods may occur,[38] discussion and second round rating resulted in agreement for all  
12 criteria for both methods.  
13  
14  
15

### 16 17 **The nature of decision support tools**

18 Panel members emphasized that criteria may not provide definitive answers, instead  
19 indicating potential problems that might need addressing, due to a perceived unacceptable  
20 variation in care.[136] While performance indicators are designed to measure the result of  
21 statements made in clinical practice guidelines, these guidelines often provide  
22 recommendations for care independent of other considerations such as multiple co-  
23 morbidities, advanced age, frailty, patient preferences, disease burden or limited life  
24 expectancy.[137-139] In such cases, less stringent goals, deprescribing or non-prescription  
25 may be more appropriate.[15 ,82 ,140] For example, a frail older patient with multiple co-  
26 morbidities and one or more functional impairments may have a life expectancy of  
27 approximately two years or less.[76] This raises the question of whether failure to intensify  
28 treatment[82] or to underuse evidence-based therapies[141] reflects appropriate clinical  
29 judgement or an inappropriate care gap. The panel felt strongly that use of indicators,  
30 guidelines or criteria providing clinical decision support should never replace critical thinking  
31 in patient care.[142]  
32  
33  
34  
35  
36  
37  
38

### 39 **Strengths and weaknesses**

40 We have followed a recommended approach [122] by suggesting criteria for which high  
41 quality evidence exists linking best practice with improved outcomes; where there are  
42 established evidence-practice gaps[98 ,99]; and where the health conditions impose the  
43 greatest burden on the healthcare system. We used a validated consensus method, an expert  
44 panel of varied specialization, and criteria written with the aim of conciseness and clarity.  
45  
46  
47

48 In addition to face and content validity, these validated criteria, much like performance  
49 indicators, will require further developmental work to provide evidence of their acceptability,  
50 operational feasibility, reliability, and degree of predictive validity.[36 ,136] Some of this  
51 work has already commenced with the original criteria.[30] Further, these criteria -only cover  
52 commonly occurring medicines and medical conditions. In addition, judgements made by an  
53 expert panel may not be representative of all health care professionals.  
54  
55

### 56 **Intended use**

57  
58  
59  
60



1  
2  
3 These validated criteria are intended for use by health care providers to enhance the quality of  
4 the Australian medication review process, for quality improvement, educational purposes and  
5 internal audit. They are also intended for external quality assessment, such as use by policy  
6 makers and for public reporting. Stakeholder involvement will be critical to facilitate local  
7 uptake and encourage further research into the effects on health outcomes.[127]  
8  
9

## 10 CONCLUSION

11  
12  
13 This study validated 41 prescribing appropriateness criteria to assist in identifying DRPs in  
14 older ( $\geq 65$  years) Australians. These criteria are intended to represent an addition to the  
15 medication management skill set that includes consideration of limited life expectancy,  
16 evidence base in the oldest old, drug burden and care coordination, patient and care-giver  
17 education, empowerment for self management, and shared decision making. These skills are  
18 far from a “do everything for everyone” philosophy, where aggressive treatment may  
19 encourage more care, not more appropriate care.[24 ,138] Despite the presence of clinical  
20 decision support tools, health care providers need to know how to think about clinical  
21 problems, not just what to think.[142]  
22  
23  
24

25  
26 **Competing interests** None declared  
27

28  
29 **Contributors** BJB designed and organised the study, analysed and interpreted the data and  
30 drafted the manuscript. TFC and RJM made substantial contributions to the conception,  
31 design, analysis and interpretation of the data, and to critically revising the draft. All authors  
32 take responsibility for the accuracy and integrity of the study. All authors have given final  
33 approval of the version to be published.  
34

35  
36 **Funding** This research received no specific grant from any funding agency in the public,  
37 commercial or not-for-profit sectors  
38

39  
40 **Data sharing statement** No additional data are available  
41

## 42 REFERENCES

- 43  
44  
45  
46  
47 1 Kwint H-F, Faber A, Gussekloo J, *et al.* Effects of Medication Review on Drug-  
48 Related Problems in Patients Using Automated Drug-Dispensing Systems. *Drugs*  
49 *& Aging* 2011;28(4):305-14.  
50 2 Ellitt GR, Engblom E, Aslani P, *et al.* Drug related problems after discharge  
51 from an Australian teaching hospital. *Pharm World Sci* 2010;32(5):622-30.  
52 3 Nishtala PS, McLachlan AJ, Bell JS, *et al.* A retrospective study of drug-related  
53 problems in Australian aged care homes: medication reviews involving  
54 pharmacists and general practitioners *Journal of Evaluation in Clinical Practice*  
55 2011;17(1):97-103.  
56  
57  
58  
59  
60



- 1  
2  
3 4 Stafford AC, Tenni PC, Peterson GM, *et al.* Drug-related problems identified in  
4 medication reviews by Australian pharmacists. *Pharm World Sci* 2009;31:216-23.  
5 5 Castelino RL, Chen TF, Guddattu V, *et al.* Use of evidence-based therapy for  
6 the prevention of cardiovascular events among older people *Eval Health Prof*  
7 2010;33(3):276-301.  
8 6 Heeley EL, Peiris DP, Patel AA, *et al.* Cardiovascular risk perception and  
9 evidence-practice gaps in Australian general practice (the AusHEART study).  
10 *MJA* 2010;192(5):254-59.  
11 7 National Institute of Clinical Studies, Australian Government. Evidence-  
12 practice gaps report, vol. 1. A review of developments 2004-2007. 2008.  
13 [http://www.nhmrc.gov.au/nics/materials-and-resources/evidence-practice-gaps-](http://www.nhmrc.gov.au/nics/materials-and-resources/evidence-practice-gaps-report-volume-one-review-developments-2004-2007)  
14 [report-volume-one-review-developments-2004-2007](http://www.nhmrc.gov.au/nics/materials-and-resources/evidence-practice-gaps-report-volume-one-review-developments-2004-2007) (accessed 18 July 2012)  
15  
16  
17 8 Hilmer SN, Gnjjidic D. The effects of polypharmacy in older adults. *Clin*  
18 *Pharmacol Ther* 2009;85:86-88.  
19 9 Pirmohamed M, James S, Meakin S, *et al.* Adverse drug reactions as cause of  
20 admission to hospital: prospective analysis of 18 820 patients. *BMJ*  
21 2004;329(7456):15-19.  
22 10 Kongkaew C, Noyce PR, Ashcroft DM. Hospital admissions associated with  
23 adverse drug reactions: A systematic review of prospective observational studies.  
24 *Ann Pharmacother* 2008;42:1017-25.  
25 11 Gilbert AL, Roughead EE, Beilby J, *et al.* Collaborative medication  
26 management services: improving patient care. *MJA* 2002;177:189-92.  
27 12 Elliott RA, Martinac G, Campbell S, *et al.* Pharmacist-led medication review to  
28 identify medication-related problems in older people referred to an aged care  
29 assessment team. A randomiized comparative study. *Drugs & Aging*  
30 2012;29(7):593-605.  
31 13 Kaur S, Mitchell G, Vitetta L, *et al.* Interventions that can reduce inappropriate  
32 prescribing in the elderly. *Drugs Aging* 2009;26(12):1013-28.  
33 14 Tulner LR, van Campen JPCM, Frankfort SV, *et al.* Changes in under-  
34 treatment after comprehensive geriatric assessment. An observational study.  
35 *Drugs & Aging* 2010;27(10):831-43.  
36 15 Le Couteur DG, Banks E, Gnjjidic D, *et al.* Deprescribing. *Aust Presc*  
37 2011;34:182-5.  
38 16 Garfinkel D, Mangin D. Feasibility study of a systemic approach for  
39 discontinuation of multiple medications in older adults. *Arch Intern Med*  
40 2010;170(18):1648-54.  
41 17 Gill JM, Mainous AG, Koopman RJ, *et al.* Impact of EHR-based clinical  
42 decision support on adherence to guidelines for patients on NSAID's: a  
43 randomised controlled trial. *Ann Fam Med* 2011;9:22-30.  
44 18 O'Connor PJ, Sperl-Hillen JM, Rush WA, *et al.* Impact of electronic health  
45 record clinical decision support on diabetes care; a randomised trial. *Ann Fam*  
46 *Med* 2011;9:12-21.  
47 19 Chang C-B, Chan D-C. Comparison of published explicit criteria for potentially  
48 inappropriate medications in older adults. *Drugs & Aging* 2010;27(12):947-57.  
49 20 Scott I, Jayathissa S. Quality of drug prescribing in older patients: is there a  
50 problem and can we improve it? *Intern Med J* 2010;40:7-18.  
51 21 The American Geriatrics Society 2012 Beers criteria update expert panel.  
52 American Geriatrics Society updated Beers criteria for potentially inappropriate  
53 medication use in older adults. *J Am Geriatr Soc* 2012;60:616-31.  
54  
55  
56  
57  
58  
59  
60

- 1  
2  
3  
4  
5  
6  
7  
8  
9  
10  
11  
12  
13  
14  
15  
16  
17  
18  
19  
20  
21  
22  
23  
24  
25  
26  
27  
28  
29  
30  
31  
32  
33  
34  
35  
36  
37  
38  
39  
40  
41  
42  
43  
44  
45  
46  
47  
48  
49  
50  
51  
52  
53  
54  
55  
56  
57  
58  
59  
60
- 22 Gallagher P, Ryan C, Byrne S, *et al*. STOPP (screening tool of older person's prescriptions) and START (screening tool to alert doctors to right treatment). Consensus validation. *International Journal of Clinical Pharmacology and Therapeutics* 2008;46(2):72-83.
- 23 Fried TR, Tinetti ME, Iannone MA. Primary care clinicians experiences with treatment decision making for older persons with multiple conditions. *Arch Intern Med* 2011;171(1):75-80.
- 24 Hayward RA. Performance measurement in search of a path. *N Eng J Med* 2007;356(9):951-52.
- 25 Dimitrow MS, Airaksinen MSA, Kivela S-L, *et al*. Comparison of prescribing criteria to evaluate the appropriateness of drug treatment in individuals aged 65 and older: A systematic review. *J Am Geriatr Soc* 2011;59(8):1521-30.
- 26 Mangin D, Sweeney K, Heath I. Preventative health care in elderly people needs rethinking. *BMJ* 2007;335:285-87.
- 27 Scott IA, Guyatt GH. Cautionary tales in the interpretation of clinical studies involving older persons. *Arch Intern Med* 2010;170(7):587-95.
- 28 Medicare Australia [homepage on the internet]. Australian Government. Home Medicines Review. <http://www.medicareaustralia.gov.au/provider/pbs/fourth-agreement/hmr.jsp>. (accessed 17 July 2012).
- 29 Basger BJ, Chen TF, Moles RJ. Inappropriate Medication Use and Prescribing Indicators in Elderly Australians. *Drugs Aging* 2008;25(9):777-93.
- 30 Basger BJ, Chen TF, Moles RJ. Application of a prescribing indicators tool to assist in identifying drug-related problems in a cohort of older Australians. *Int J Pharm Pract* 2012;20(3):172-82.
- 31 Laroche ML, Charmes JP, Bouthier JP, *et al*. Inappropriate medications in the elderly. *Clin Pharmacol Ther* 2009;85(1):94-7.
- 32 Maio V, Jutkowitz E, Herrera K, *et al*. Appropriate medication prescribing in elderly patients: how knowledgeable are primary care physicians? A survey study in Parma, Italy. *J Clin Pharm Ther* 2011;36:468-80.
- 33 Resnick B, Pacala JT. 2012 Beers criteria. *J Am Geriatr Soc* 2012;60:612-13.
- 34 Chang C-B, Chen J-H, Wen C-J, *et al*. Potentially inappropriate medications in geriatric outpatients with polypharmacy: application of six sets of published explicit criteria. *Br J Clin Pharmacol* 2011;72(3):482-89.
- 35 Runciman WB, Hunt TD, Hannaford NA, *et al*. CareTrack: assessing the appropriateness of health care delivery in Australia. *MJA* 2012;197(2):100-05.
- 36 Martirosyan L, Voorham J, Haaijer-Ruskamp FM, *et al*. A systematic literature review : prescribing indicators related to type 2 diabetes mellitus and cardiovascular risk management. *Pharmacoepidemiol Drug Saf* 2010;19:319-34.
- 37 Levy HB, Marcus E-L, Christen C. Beyond the Beers criteria: a comparative overview of explicit criteria *Ann Pharmacother* 2010;44:1968-75.
- 38 Fitch K, Bernstein SJ, Aguilar MS, *et al*. The RAND/UCLA Appropriateness Method User's Manual 2001. Rand Corporation. [www.rand.org/pubs/monograph\\_reports/MR1269.html](http://www.rand.org/pubs/monograph_reports/MR1269.html) (accessed 18 July 2012)
- 39 Martirosyan L, Braspenning J, Denig P, *et al*. Prescribing quality indicators of type 2 diabetes mellitus ambulatory care. *Qual Saf Health Care* 2008;17:318-23.
- 40 Bettering the evaluation and care of health (BEACH). Family Medicine Research Centre. The University of Sydney. <http://sydney.edu.au/medicine/fmrc/beach/> (accessed 18 July 2012)

- 1  
2  
3  
4  
5  
6  
7  
8  
9  
10  
11  
12  
13  
14  
15  
16  
17  
18  
19  
20  
21  
22  
23  
24  
25  
26  
27  
28  
29  
30  
31  
32  
33  
34  
35  
36  
37  
38  
39  
40  
41  
42  
43  
44  
45  
46  
47  
48  
49  
50  
51  
52  
53  
54  
55  
56  
57  
58  
59  
60
- 41 Access to Pharmaceutical Services. *Pharmaceutical Benefits Scheme. Department of Health and Ageing. Australian Government.*  
[http://www.health.gov.au/internet/budget/publishing.nsf/Content/2010-11\\_Health\\_PBS\\_sup1/\\$File/Outcome%20%20-%20Access%20to%20Pharmaceutical%20Services.pdf](http://www.health.gov.au/internet/budget/publishing.nsf/Content/2010-11_Health_PBS_sup1/$File/Outcome%20%20-%20Access%20to%20Pharmaceutical%20Services.pdf). (accessed 10 July 2012).
- 42 *eTG complete [CD-ROM]. Melbourne (VIC): Therapeutic Guidelines, 2011 Nov*
- 43 *Rossi S (Editor), Australian Medicines Handbook 2012 (CD-ROM). Adelaide: Australian Medicines Handbook Pty Ltd; 2012*
- 44 NSW Therapeutic Advisory Group. Indicators for Quality Use of Medicines in Australian Hospitals 2007  
<http://www.ciap.health.nsw.gov.au/nswtag/documents/publications/QUMIndicators/Manual0408.pdf> (accessed 18 July 2012).
- 45 Shekelle PG. Appropriateness criteria: a useful tool for the cardiologist. *Heart* 2009;95(7):517-20.
- 46 SooHoo NF, Lieberman JR, Farnig E, *et al.* Development of quality of care indicators for patients undergoing total hip or total knee replacement. *Qual Saf* 2011;20:153-57.
- 47 Avery AJ, Dex GM, Mulvaney C, *et al.* Development of prescribing-safety indicators for GPs using the RAND appropriateness method. *Brit J Gen Pract* 2011;61:526-36.
- 48 Hypertension and target blood pressure. National Prescribing Service. Indicators of quality prescribing in Australian general practice. A Manual for Users [online]. Available from URL:  
[http://www.nps.org.au/data/assets/pdf\\_file/0019/37351/indicators\\_full.pdf](http://www.nps.org.au/data/assets/pdf_file/0019/37351/indicators_full.pdf) (accessed 18 July 2012)
- 49 Heart Foundation Guide to management of hypertension 2008. Updated December 2010.  
<http://www.heartfoundation.org.au/SiteCollectionDocuments/HypertensionGuidelines2008to2010Update.pdf> (accessed 18 July 2012).
- 50 *Australian Medicines Handbook Drug Choice Companion: Aged Care. 3rd edn. Adelaide: Australian Medicines Handbook Pty Ltd; 2010.*
- 51 Charpentier MM, Bundeff MM. Treating hypertension in the very elderly. *Ann Pharmacother* 2011;45:1138-45.
- 52 Gribbin J, Hubbard R, Gladman JRF, *et al.* Risk of falls associated with antihypertensive medication; population-based case control study. *Age Ageing* 2010;39:592-97.
- 53 Tinetti ME, Kumar C. The patient who falls. *JAMA* 2010;303(3):258-66.
- 54 Therapeutics Initiative. Do statins have a role in primary prevention? An update. Therapeutics letter. March-April 2010; 77: 1-5.  
<http://www.ti.ubc.ca/sites/ti.ubc.ca/files/77.pdf> (accessed 18 July 2012).
- 55 Ray KK, Seshasai SRK, Erqou S, *et al.* Statins and all-cause mortality in high-risk primary prevention. A meta-analysis of 11 randomised controlled trials involving 65,229 participants. *Arch Intern Med* 2010;170(12):1024-31.
- 56 deLorgeril M, Salen P, Abramson J, *et al.* Cholesterol lowering, cardiovascular diseases, and the rosuvastatin-JUPITER controversy. A critical reappraisal. *Arch Intern Med* 2010;170(12):1032-36.
- 57 Petersen LK, Christensen K, Kragstrup J. Lipid-lowering treatment to the end? A review of observational studies and RCTs on cholesterol and mortality in 80+-year olds. *Age Ageing* 2010;39:674-80.

- 1  
2  
3 58 Robinson JG. Lipid-lowering therapy for the primary prevention of  
4 cardiovascular disease in the elderly. Opportunities and challenges. *Drugs Aging*  
5 2009;26(11):917-31.
- 6 59 Krum H, Jelinek M, Stewart S, *et al.* 2011 Update to National Heart Foundation  
7 of Australia and Cardiac Society of Australia and New Zealand guidelines for  
8 the prevention, detection and management of chronic heart failure in Australia,  
9 2006 *MJA* 2011;194(8):405-09.
- 10 60 Krum H, Teerlink JR. Medical therapy for chronic heart failure. *Lancet*  
11 2011;378:713-21.
- 12 61 Huang D, Cheng JWM. Pharmacologic management of heart failure with  
13 preserved ejection fraction. *Ann Pharmacother* 2010;44:1933-45.
- 14 62 Management of diastolic heart failure [revised 2008 June]. In: eTG complete  
15 [CD-ROM]. Melbourne: Therapeutic Guidelines Limited; 2011 Nov.
- 16 63 Huang N, Duggan K, Harman J. Lifestyle management of hypertension. *Aust*  
17 *Presc* 2008;31:150-53.
- 18 64 Stokes GS. Management of hypertension in the elderly patient. *Clinical*  
19 *Interventions in Aging* 2009;4:379-89.
- 20 65 Bajorek BV, Krass I, Ogle SJ, *et al.* Optimizing the use of antithrombotic  
21 therapy for atrial fibrillation in older people: A pharmacist-led multidisciplinary  
22 intervention. *J Am Geriatr Soc* 2005;53:1912-20.
- 23 66 De Caterina R, Hylek EM. Stroke prevention in atrial fibrillation: current status  
24 and near-future directions. *Am J Med* 2011;124:793-99.
- 25 67 Gillett RG, Norrell A. Considerations for safe use of statins: liver enzyme  
26 abnormalities and muscle toxicity. *Am Fam Physician* 2011;83(6):711-16.
- 27 68 Thomas JE, Tershakovec AM, Jones-Burton C, *et al.* Lipid lowering for  
28 secondary prevention of cardiovascular disease in older adults. *Drugs Aging*  
29 2010;27(12):959-72.
- 30 69 Perrotta C, Aznar M, Mejia R, *et al.* Oestrogens for preventing recurrent  
31 urinary tract infection in postmenopausal women. *Cochrane Database of*  
32 *Systematic Reviews* 2008, Issue 2. Art. No.: CD005131. DOI:  
33 10.1002/14651858.CD005131.pub2. 2008.
- 34 70 Treatment of hypothyroidism [revised 2009 June]. In: eTG complete [CD-  
35 ROM]. Melbourne: Therapeutic Guidelines Limited; 2011 July.
- 36  
37  
38  
39  
40  
41  
42 71 Reducing Risk in Heart Disease 2007. A summary guide for preventing  
43 cardiovascular events in people with coronary heart disease. Updated 2008.  
44 National Heart Foundation of Australia and the Cardiac Society of Australia and  
45 New Zealand. [http://www.heartfoundation.org.au/information-for-](http://www.heartfoundation.org.au/information-for-professionals/Clinical-Information/Pages/coronary-heart-disease.aspx)  
46 [professionals/Clinical-Information/Pages/coronary-heart-disease.aspx](http://www.heartfoundation.org.au/information-for-professionals/Clinical-Information/Pages/coronary-heart-disease.aspx) (accessed  
47 12 July 2012).
- 48 72 Volpe M. Should all patients at high cardiovascular risk receive renin-  
49 angiotensin system blockers? *Q J Med* 2012;105:11-27.
- 50 73 Boyd CM, Leff B, Wolff JL, *et al.* Informing clinical practice guideline  
51 development and implementation: prevalence of coexisting conditions among  
52 adults with coronary heart disease. *J Am Geriatr Soc* 2011;59:797-805.
- 53 74 Heart Foundation. Guide to management of Hypertension 2008 updated 2010  
54 [online].  
55 [http://www.heartfoundation.org.au/SiteCollectionDocuments/HypertensionGuid-](http://www.heartfoundation.org.au/SiteCollectionDocuments/HypertensionGuidelines2008to2010Update.pdf)  
56 [elines2008to2010Update.pdf](http://www.heartfoundation.org.au/SiteCollectionDocuments/HypertensionGuidelines2008to2010Update.pdf) [accessed 18 July 2012].  
57  
58  
59  
60



- 1  
2  
3 75 Guidelines for the assessment of absolute cardiovascular disease risk.  
4 [http://www.heartfoundation.org.au/SiteCollectionDocuments/guidelines-](http://www.heartfoundation.org.au/SiteCollectionDocuments/guidelines-Absolute-risk.pdf)  
5 [Absolute-risk.pdf](http://www.heartfoundation.org.au/SiteCollectionDocuments/guidelines-Absolute-risk.pdf) (accessed 18 July 2012).  
6  
7 76 Holmes HM. Rational prescribing for patients with a reduced life expectancy.  
8 *Clin Pharmacol Ther* 2009;85(1):103-7.  
9  
10 77 Improving treatment of systolic heart failure. NPS News 75, 2011. National  
11 Prescribing Service Limited.  
12 [http://www.nps.org.au/ data/assets/pdf file/0006/132495/News75\\_heart\\_failure](http://www.nps.org.au/data/assets/pdf_file/0006/132495/News75_heart_failure_1011v2.pdf)  
13 [1011v2.pdf](http://www.nps.org.au/data/assets/pdf_file/0006/132495/News75_heart_failure_1011v2.pdf) (accessed 18 July 2012).  
14  
15 78 Caughey GE, Roughead EE, Shakib S, *et al.* Co-morbidity and potential  
16 treatment conflicts in elderly heart failure patients. *Drugs Aging* 2011;28(7):575-  
17 81.  
18  
19 79 Lip GYH, Halperin JL. Improving stroke risk stratification in atrial fibrillation.  
20 *Am J Med* 2010;123:484-88.  
21  
22 80 Hughes M, Lip GYH. Risk factors for anticoagulation-related bleeding  
23 complications in patients with atrial fibrillation: a systematic review. *Q J Med*  
24 2007;100:599-607.  
25  
26 81 Statins and muscle disorders - be careful with the dose. Australian Adverse  
27 Drug Reactions Bulletin 2008; 27 (3). <http://www.tga.gov.au/pdf/aadrb-0806.pdf>  
28 (accessed 18 July 2012)  
29  
30 82 LeChauncy WD, Landrum CR, Urech TH, *et al.* Treating chronically ill people  
31 with diabetes mellitus with limited life expectancy: Implications for performance  
32 measurement. *J Am Geriatr Soc* 2012;DOI: 10.1111/j.1532-5415.2011.03784.x:1-  
33 9.  
34  
35 83 Lee SJ, Boscardin WJ, Censer IS, *et al.* The risks and benefits of implementing  
36 glycemic control guidelines in frail older adults with diabetes mellitus. *J Am*  
37 *Geriatr Soc* 2011;59:666-72.  
38  
39 84 Joint Formulary Committee. British National Formulary (online) London: BMJ  
40 Group and Pharmaceutical Press <<http://www.medicinescomplete.com>>  
41 [Accessed on 18 July 2012].  
42  
43 85 Analgesic choices in persistent pain. Prescribing Practice Review 2006; 35.  
44 National Prescribing Service Limited  
45 [http://www.nps.org.au/ data/assets/pdf file/0017/23750/ppr35\\_analgesics\\_0906.](http://www.nps.org.au/data/assets/pdf_file/0017/23750/ppr35_analgesics_0906.pdf)  
46 [pdf](http://www.nps.org.au/data/assets/pdf_file/0017/23750/ppr35_analgesics_0906.pdf) (accessed 18 July 2012).  
47  
48 86 Hill KD, Wee R. Psychotropic drug-induced falls in older people. A review of  
49 interventions aimed at reducing the problem. *Drugs Aging* 2012;29(1):15-30.  
50  
51 87 Zeimer H. Medications and falls in older people. *Journal of Pharmacy Practice*  
52 *and Research* 2008;38(2):148-51.  
53  
54 88 Caughey GE, Roughead EE, Shakib S, *et al.* Comorbidity of chronic disease and  
55 potential treatment conflicts in older people dispensed antidepressants. *Age*  
56 *Ageing* 2010;39:488-94.  
57  
58 89 Proton pump inhibitors. NPS News 46, 2006. National Prescribing Service  
59 Limited.  
60 [http://www.nps.org.au/ data/assets/pdf file/0016/23821/news46\\_gord\\_ppis\\_060](http://www.nps.org.au/data/assets/pdf_file/0016/23821/news46_gord_ppis_0606.pdf)  
[6.pdf](http://www.nps.org.au/data/assets/pdf_file/0016/23821/news46_gord_ppis_0606.pdf) (accessed 18 July 2012).  
90  
91 National Asthma Council Australia. Asthma Management Handbook 2006.  
92 National Asthma Council Australia, Melbourne, 2006  
93 [http://www.nationalasthma.org.au/uploads/handbook/370-amh2006\\_web\\_5.pdf](http://www.nationalasthma.org.au/uploads/handbook/370-amh2006_web_5.pdf)  
94 (accessed 18 July 2012).

- 1  
2  
3 91 Inderjeeth CA, Poland KE. Management of osteoporosis in older people. *J Pharm Pract Res* 2010;40:229-34.
- 4  
5 92 Reducing fracture risk in osteoporosis. NPS News 73, 2011. National Prescribing  
6 Service Limited.  
7 [http://www.nps.org.au/data/assets/pdf\\_file/0014/126401/News73\\_osteoporosis\\_0511.pdf](http://www.nps.org.au/data/assets/pdf_file/0014/126401/News73_osteoporosis_0511.pdf) (accessed 18 July 2012).
- 8  
9  
10 93 Gates BJ, Sonnett TE, DuVall CAK, *et al.* Review of osteoporosis  
11 pharmacotherapy for geriatric patients. *Am J Geriatr Pharmacother* 2009;7:293-  
12 323.
- 13 94 Cheung AM, Detsky AS. Osteoporosis and fractures - Missing the bridge?  
14 *JAMA* 2008;299(12):1468-70.
- 15 95 Commonwealth of Australia. The National Strategy for Quality Use of  
16 Medicines Plain English Edition [online]. Available from URL:  
17 [http://www.health.gov.au/internet/main/Publishing.nsf/Content/CA777524C860DF2CA256F1800468B61/\\$File/natstrateng.pdf](http://www.health.gov.au/internet/main/Publishing.nsf/Content/CA777524C860DF2CA256F1800468B61/$File/natstrateng.pdf) [accessed 18 July 2012]
- 18  
19 96 Caughey GE, Vitry AI, Gilbert AL, *et al.* Prevalence of comorbidity of chronic  
20 diseases in Australia. *BMC Public Health* 2008.  
21 <http://www.biomedcentral.com/1471-2458/8/221>. (accessed 18 July 2012).
- 22  
23 97 Top 40 most frequently managed problems: Patients aged 65+. Personal  
24 communication, unpublished data from the BEACH Program, Family Medicine  
25 Research Centre, University of Sydney, November 2011.  
26 <http://svdnev.edu.au/medicine/fmrc/beach/index.php> (accessed 10 July 2012).
- 27  
28 98 Evidence-practice gaps report. vol. 2. National Institute of Clinical Studies.  
29 Australian Government 2005.  
30 [http://www.nhmrc.gov.au/nics/material\\_resources/resources/evidence\\_volume\\_two.htm](http://www.nhmrc.gov.au/nics/material_resources/resources/evidence_volume_two.htm). (accessed 12 July 2012)
- 31  
32 99 Evidence-practice gaps report. Vol. 1. National Institute of Clinical Studies,  
33 Australian Government 2003.  
34 [http://www.nhmrc.gov.au/nics/material\\_resources/resources/evidence\\_volume\\_one.htm](http://www.nhmrc.gov.au/nics/material_resources/resources/evidence_volume_one.htm). (accessed 17 July 2012).
- 35  
36 100 Evidence-Practice Gaps Report Volume 1. A review of developments: 2004-  
37 2007. National Institute of Clinical Studies. Australian Government.  
38 <http://www.nhmrc.gov.au/nics/materials-and-resources/evidence-practice-gaps-report-volume-one-review-developments-2004-2007> (accessed 17 July 2012).
- 39  
40 101 Bajorek BV, Ren S. Utilisation of antithrombotic therapy for stroke prevention  
41 in atrial fibrillation in a Sydney hospital: then and now. *Int J Clin Pharm*  
42 2012;34:88-97.
- 43  
44 102 O'Connor MN, Gallagher P, O'Mahony D. Inappropriate prescribing. Criteria,  
45 detection and prevention. *Drugs Aging* 2012;29(6):437-52.
- 46  
47 103 Castelino RL, Bajorek BV, Chen TF. Retrospective evaluation of home medicine  
48 review by pharmacists in older Australian Patients using the Medication  
49 Appropriateness Index. *Ann Pharmacother* 2010;44:1922-29.
- 50  
51 104 King MA, Roberts MS. The influence of the Pharmaceutical Benefits Scheme  
52 (PBS) on inappropriate prescribing in Australian nursing homes. *Pharmacy  
53 World & Science* 2007;29:39-42.
- 54  
55 105 Stafford AC, Alswayan MS, Tenni PC. Inappropriate prescribing in older  
56 residents of Australian care homes. *J Clin Pharm Ther* 2011;36:33-44.
- 57  
58 106 Widagdo IS, Nyfort-Hansen K, Kowalski SR. Prevalence of potentially  
59 inappropriate medication use in elderly hospitalised patients. *J Pharm Pract Res*  
60 2011;41:122-25.



- 1  
2  
3 107 Roughead EE, Anderson B, Gilbert AL. Potentially inappropriate prescribing  
4 among Australian veterans and war widows/widowers. *Internal Medicine Journal*  
5 2007;37:402-05.  
6  
7 108 Fick DM, Cooper JW, Wade WE, *et al.* Updating the Beers criteria for  
8 potentially inappropriate medication use in older adults: results of a US  
9 consensus panel of experts. *Archives of Internal Medicine* 2003;163(22):2716-24.  
10 109 Ryan C, O'Mahony D, Kennedy J, *et al.* Appropriate prescribing in the elderly:  
11 an investigation of two screening tools, Beers criteria considering diagnosis and  
12 independent of diagnosis and improving prescribing in the elderly tool to identify  
13 inappropriate use of medicines in the elderly in primary care in Ireland. *J Clin*  
14 *Pharm Ther* 2009;34:369-76.  
15 110 American Geriatrics Society updated Beers criteria for potentially  
16 inappropriate medication use in older adults. The American Geriatrics Society  
17 2012 Beers Criteria update expert panel. *J Am Geriatr Soc* 2012;60:616-31.  
18 111 Ionescu-Ittu R, Abrahamowicz M, Jackevicius CA, *et al.* Comparative  
19 effectiveness of rhythm control vs rate control drug treatment effect on mortality  
20 in patients with atrial fibrillation. *Arch Intern Med* 2012;172(13):997-1004.  
21 112 Page RL, Linnebur SA, Bryant LL, *et al.* Inappropriate prescribing in the  
22 hospitalised elderly patient: Defining the problem, evaluation tools, and possible  
23 solutions. *Clin Interv Aging* 2010;5:75-87.  
24 113 Holt S, Schmiedl S, Thurmann PA. Potentially inappropriate medications in the  
25 elderly: The PRISCUS list. *Deutsches Arzteblatt International* 2010;107(31-  
26 32):543-51.  
27 114 Laroche ML, Charmes JP, Merle L. Potentially inappropriate medications in  
28 the elderly: a French consensus panel list. *European Journal of Clinical*  
29 *Pharmacology* 2007;63:725-31.  
30 115 Castelino RL, Bajorek BV, Chen TF. Targeting suboptimal prescribing in the  
31 elderly: a review of the impact of pharmacy services. *Ann Pharmacother*  
32 2009;43:1096-106.  
33 116 Beers MH. Explicit criteria for determining potentially inappropriate  
34 medication use by the elderly. An update. *Archives of Internal Medicine*  
35 1997;157(14):1531-6.  
36 117 Beers MH, Ouslander JG, Rollinger I, *et al.* Explicit criteria for determining  
37 inappropriate medication use in nursing home residents. UCLA Division of  
38 Geriatric Medicine. *Archives of Internal Medicine* 1991;151(9):1825-32.  
39 118 McLeod PJ, Huang AR, Tamblyn RM, *et al.* Defining inappropriate practices in  
40 prescribing for elderly people: a national consensus panel. *CMAJ*  
41 1997;156(3):385-91.  
42 119 Zhan C, Sangl J, Bierman AS, *et al.* Potentially inappropriate medication use in  
43 the community-dwelling elderly: findings from the 1996 Medical Expenditure  
44 Panel Survey. *JAMA* 2001;286(22):2823-9.  
45 120 Starfield B, Lemke KW, Herbert R, *et al.* Comorbidity and the use of primary  
46 care and specialist care in the elderly. *Ann Fam Med* 2005;3:215-22.  
47 121 Barnett K, Mercer SW, Norbury M, *et al.* Epidemiology of multimorbidity and  
48 implications for health care, research, and medical education: a cross-sectional  
49 study. *Lancet* 2012;380:37-43.  
50 122 Evans SM, Lowinger JS, Sprivulis PC, *et al.* Prioritizing quality indicator  
51 development across the healthcare system: identifying what to measure. *Intern*  
52 *Med J* 2009;39:648-54.  
53  
54  
55  
56  
57  
58  
59  
60

- 1  
2  
3 123 Elliott RA, Woodward MC, Osborne CA. Indicators of prescribing quality for  
4 elderly hospital inpatients. *Aust J Hosp Pharm* 2001;31:19-25.
- 5 124 National Prescribing Service. Indicators of quality prescribing in Australian  
6 general practice 2006. A Manual for Users.  
7 [http://www.nps.org.au/  
8 data/assets/pdf\\_file/0019/37351/indicators\\_full.pdf](http://www.nps.org.au/data/assets/pdf_file/0019/37351/indicators_full.pdf)  
9 (accessed 14 Feb 2012).
- 10 125 A proposed set of clinical indicators for stakeholder comment by 30 July 2012.  
11 RACGP clinical improvement unit practice, policy and innovation department.  
12 The Royal Australian College of General Practitioners.  
13 [http://www.racgp.org.au/Content/NavigationMenu/ClinicalResources/Clinicalin  
14 dicators/2012ClinicalIndicators\\_ConsultationPaper.pdf](http://www.racgp.org.au/Content/NavigationMenu/ClinicalResources/Clinicalindicators/2012ClinicalIndicators_ConsultationPaper.pdf) (accessed 16 July 2012).
- 15 126 Morris CJ, Cantrill JA, Hepler CD, *et al.* Preventing drug-related morbidity--  
16 determining valid indicators. *International Journal for Quality in Health Care*  
17 2002;14(3):183-98.
- 18 127 Bell JS, Le Couteur DG, McLachlan AJ, *et al.* Improving medicine selection for  
19 older people. Do we need an Australian classification for inappropriate  
20 medicines use? *Aust Fam Physician* 2012;41:9-10.
- 21 128 Britt H, Miller GC, Charles J, *et al.* General practice activity in Australia 2000-1  
22 to 2009-10: 10 year data tables. General practice series no. 28. Cat. no. GEP 28.  
23 Canberra: AIHW. [http://www.aihw.gov.au/publication-  
24 detail/?id=6442472440&tab=2](http://www.aihw.gov.au/publication-detail/?id=6442472440&tab=2) (accessed 17 July 2012). 2010.
- 25 129 Boyd CM, Darer J, Boulton C, *et al.* Clinical practice guidelines and quality of care  
26 for older patients with multiple comorbid diseases. *JAMA* 2005;294:716-24.
- 27 130 Kamerow D. How can we treat multiple chronic conditions? *BMJ*  
28 2012;344:e1487 doi: 10.136/bmj.e87
- 29  
30  
31  
32 131 Richmond RL, Law J, Kay-Lambkin F. Physical, mental, and cognitive function  
33 in a convenience sample of centenarians in Australia. *J Am Geriatr Soc*  
34 2011;59:1080-86.
- 35 132 Wastesson JW, Parker MG, Fastbom J, *et al.* Drug use in centenarians  
36 compared with nonagenarians and octogenarians in Sweden: a nationwide  
37 register-based study. *Age and Ageing* 2012;41:218-24.
- 38 133 Watts G. Why the exclusion of older people from clinical research must stop.  
39 *BMJ* 2012;344:e3445.
- 40 134 Frada G, Bennati E, Cardillo E, *et al.* Pharmacotherapy in the extreme  
41 longevity. *Arch Gerontol Geriatr* 2009;49:60-63.
- 42 135 McGory ML, Kao KK, Shekelle PG, *et al.* Developing quality indicators for  
43 elderly surgical patients. *Ann Surg* 2009;250:338-47.
- 44 136 Campbell SM, Braspenning J, Hutchinson A, *et al.* Research methods used in  
45 developing and applying quality indicators in primary care. *Qual Saf Health*  
46 *Care* 2002;11:358-64.
- 47 137 Vitry AI, Zhang Y. Quality of Australian clinical guidelines and relevance to the  
48 care of older people with multiple comorbid conditions. *Med J Aust*  
49 2008;189:360-65.
- 50 138 Lee SJ, Walter LC. Quality indicators for older adults. Preventing unintended  
51 harms. *JAMA* 2011;306(13):1481-82.
- 52 139 Gilbert AL, Caughey GE, Vitry AI, *et al.* Ageing well: Improving the  
53 management of patients with multiple chronic health problems. *Australas J*  
54 *Ageing* 2011;30(S2):32-37.
- 55  
56  
57  
58  
59  
60

- 1  
2  
3 140 Gnjdic D, Hilmer SN, Blyth FM, *et al.* High-risk prescribing and incidence of  
4 frailty among older community-dwelling men. *Clin Pharmacol Ther*  
5 2012;91(3):521-28.  
6 141 Sirois C, Moisan J, Poirier P, *et al.* Association between age and the initiation of  
7 antihypertensive, lipid lowering and antiplatelet medications in elderly  
8 individuals newly treated with antidiabetic drugs. *Age Ageing* 2009;38:741-45.  
9 142 Powers JH. Practice guidelines. Belief, criticism, and probability. *Arch Intern*  
10 *Med* 2011;171(1):15-16.  
11  
12  
13  
14  
15  
16  
17  
18  
19  
20  
21  
22  
23  
24  
25  
26  
27  
28  
29  
30  
31  
32  
33  
34  
35  
36  
37  
38  
39  
40  
41  
42  
43  
44  
45  
46  
47  
48  
49  
50  
51  
52  
53  
54  
55  
56  
57  
58  
59  
60

## Validation of prescribing appropriateness criteria for older Australians using the RAND/UCLA Appropriateness Method

### ARTICLE SUMMARY

#### Article focus

- Drug-related problems (DRPs) are common in older people, resulting in under-treatment with proven medicines, and disproportionately high numbers of adverse drug events
- The aim of this study was to validate a list of prescribing appropriateness criteria for use in older people

#### Key messages

- The use of medication assessment criteria is one method to assist in identifying DRPs. Criteria developed elsewhere may have little or no applicability to the Australian healthcare environment
- Validation of proposed Australian prescribing appropriateness criteria for older people was accomplished using a two-round modified Delphi method, resulting in agreement for all criteria as measured by median panel ratings, and the amount of dispersion of panel ratings, based on the interpercentile range
- Use of these criteria, together with other Australian medication review processes, may assist in improving patient care in a variety of settings by efficiently identifying DRPs to common medical conditions and commonly used medicines. They may also contribute to the medication management knowledge of health care professionals through education programs and by use in daily practice, and for the evaluation of the quality of pharmaceutical care in older people

#### Strengths and limitations

- A validated consensus method was used involving an expert medication management panel of varied specialization. Criteria were based on established evidence-practice gaps and degree of disease burden imposed on the health care system, and were written with the aim of conciseness and clarity
- Further developmental work is required to assess the usefulness of these criteria, which only included commonly occurring medicines and medical conditions

### ABSTRACT

**Objective:** To update and validate proposed national prescribing appropriateness criteria to assist in identifying drug-related problems (DRPs) to commonly occurring medications and medical conditions in older ( $\geq 65$  years old) Australians.

**Design:** Rand/UCLA Appropriateness Method

**Participants:** A panel of medication management experts were identified consisting of geriatricians, clinical pharmacists, and disease management advisors to organisations that

1  
2  
3 produce Australian evidence-based therapeutic publications. This resulted in a round one  
4 panel of fifteen members, and a round two panel of twelve members

5 **Main outcome measure:** Agreement on all criteria

6 **Results:** Forty eight prescribing criteria were rated. In the first rating round via email, there  
7 was disagreement regarding ) 17 of the criteria according to median panel ratings. During a  
8 face-to-face second round meeting, discussion resulted in 39) of the proposed criteria being  
9 accepted, with 25 of 48 criteria requiring amendment or updating. criteria) Fourteen were  
10 unchanged, and 9 criteria deleted. Two new criteria were added, resulting in a final validated  
11 list of 41 prescribing appropriateness criteria. Agreement was reached for all 41 criteria,  
12 measured by median panel ratings and the amount of dispersion of panel ratings, based on the  
13 interpercentile range

14 **Conclusions:** A set of 41 Australian prescribing appropriateness criteria were validated by an  
15 expert panel. Use of these criteria, together with clinical judgement and other medication  
16 review processes such as patient interview, is intended to assist in improving patient care by  
17 efficiently detecting potential DRPs related to commonly occurring medicines and medical  
18 conditions in older Australians. These criteria may also contribute to the medication  
19 management education of health care professionals

## 20 21 22 23 24 25 26 INTRODUCTION

27  
28 Drug-related problems (DRPs) in older people ( $\geq 65$  years old) are common,[1-4] resulting in  
29 both undertreatment with proven medicines[5-7] and disproportionately high numbers of  
30 serious adverse medication events due to polypharmacy.[8-10] DRPs can occur for many  
31 reasons such as inadequate monitoring of medicines, poor medicine or dose selection,  
32 duplication of medicines, or factors to do with the way the patient uses the medicine.[2,3,11  
33 ,12] Methods to identify and reduce DRPs include educational interventions, [13]  
34 comprehensive geriatric assessment, [14] discontinuation of multiple medications, [15  
35 ,16]electronic health record clinical decision support, [17,18]and the use of medication  
36 assessment criteria.[13,19-22]

37  
38 However in older patients, the importance of traditional outcomes, such as discrete clinical  
39 events or mortality, may be secondary to maintaining physical and cognitive function or relief  
40 of symptoms.[23] Because of this, optimal care requires clinical decision support tools that  
41 consider issues such as patient preferences, frailty, cost, and co-morbidities.[24] Additionally,  
42 few criteria target the oldest old[25] (generally regarded as people older than 85 years),  
43 where evidence may be poor, and preventive interventions may be encouraged in patients  
44 who have already exceeded an average lifespan.[26,27] In Australia, issues such as these are  
45 intended to be considered when patients are interviewed by an accredited pharmacist as part  
46 of the Home Medicines Review program.[28] This program aims to provide the  
47 sophistication lacking in explicit (that is, criterion-based rather than implicit or judgement  
48 based) measures such as our criteria list, and is targeted towards patients who may be  
49 (among other reasons) currently taking  $\geq 5$  regular medicines, attending a number of different  
50 doctors, or have recently been discharged from hospital.

1  
2  
3 In 2008, we proposed a list of 48 prescribing appropriateness criteria (45 explicit and three  
4 implicit) aimed at improving detection of DRPs as part of the Australian medication review  
5 process.[29] When applied to a cohort of older Australians, a high incidence of  
6 undertreatment and use of inappropriate medicines was detected.[30] It was also intended that  
7 our criteria have application in other areas, as criteria derived outside Australia have been  
8 applied in a variety of settings such as community, nursing home and hospital,[19] and have  
9 been applied using a variety of study designs such as in retrospective cross-sectional studies,  
10 randomized controlled trials, and in retrospective and prospective case series.[13] They have  
11 been used in daily clinical practice;[31] in the evaluation of health plans[31]and in the  
12 evaluation of knowledge of appropriate prescribing;[32] in the training of health care  
13 professionals;[33] to evaluate nursing home adherence to medicine-related regulations;[33]  
14 and to develop healthcare quality indicators.[34]  
15  
16  
17  
18

19 The appropriateness of health care delivery in Australia for common conditions, such as atrial  
20 fibrillation and osteoarthritis, has been shown to be poor.[35] Our criteria were based on the  
21 most frequent medicines prescribed to Australians, and the most frequent medical conditions  
22 for which older Australians ( $\geq 65$  years old) consult medical practitioners. Australian  
23 medication and disease state resources and guidelines were used to provide content  
24 validity.[29] However, unlike our criteria, other prescribing criteria or tools have combined  
25 evidence with expert opinion to provide face validity.[36,37]  
26  
27  
28  
29

30 The aim of this study was to update our list of criteria. We wished to add missing  
31 recommendations for co-morbidity and for the oldest old where possible, and to validate the  
32 criteria through expert consensus. To do this, we identified a panel of medication  
33 management experts, and chose the RAND/UCLA appropriateness method,[38] which has  
34 been described as the best method for systematically combining recommendations from  
35 clinical guidelines, with the opinion of healthcare providers.[39]  
36  
37  
38

## 39 **METHODS**

### 40 **Ethics**

41 Ethics approval was obtained from the Human Research Ethics Committee of the University  
42 of Sydney.  
43  
44  
45

### 46 **Criteria development**

47 In 2008, we found the 50 highest-volume Australian Pharmaceutical Benefits Scheme (PBS)  
48 medicines prescribed, and the forty most common reasons for older Australians to seek or  
49 receive healthcare. Healthcare information was obtained using the BEACH (Bettering The  
50 Evaluation and Care of Health) program, which continuously collects information about the  
51 clinical activities in general practice in Australia.[40] We then used Australian medication  
52 information sources to identify both optimal and inappropriate medication management of  
53 these common conditions.[29] In Australia, medication availability and use is largely  
54 determined by the PBS.[41] In October 2011, commonly used medications and medical  
55 conditions were checked and updated using the BEACH program to ensure that criteria  
56  
57  
58  
59  
60



1  
2  
3 content was current. Changes in evidence, product information, Australian consensus  
4 documents, evidence-based publication recommendations or clinical practice guidelines  
5 relating to our criteria were noted for evaluation by an expert medication management panel.  
6 The criteria were designed to provide guidance on the process of care wherever it occurred –  
7 community, hospital, residential home, care home or nursing home. Major considerations in  
8 their development were potential accessibility of data from the patient, their medical notes  
9 and/or their health care professional(s), conciseness and clarity of wording, and provision of a  
10 practical number of criteria. Most were explicit to enable consistent application, with  
11 additional notes provided for interpretation where necessary. They were written as a  
12 statement of the kind of medication management that should or should not occur, to simplify  
13 comprehension and facilitate uptake.[29]  
14  
15  
16  
17

### 18 **Validation of criteria - participants**

19 We recruited a multidisciplinary group of medication management experts to review, update  
20 and rate the criteria, consisting of geriatrician/pharmacologists, clinical pharmacists, and  
21 disease management advisors to organisations that produce Australian evidence-based  
22 therapeutic publications. This resulted in a round one panel of fifteen members. The  
23 geriatricians consisted of two professors of geriatric medicine; an associate professor of  
24 clinical pharmacology and aged care; a research fellow in geriatric medicine; and a hospital  
25 staff geriatrician. Clinical pharmacists consisted of a residential medication management  
26 review pharmacist; a home medicines review pharmacist; four hospital-based pharmacists  
27 (two team leaders, one director and one education and training pharmacist), and a professor  
28 of aged care (Pharmacy). Disease management advisors to Australian evidence-based  
29 therapeutic organisations consisted of Therapeutic Guidelines,[42] Australian Medicines  
30 Handbook,[43] and the New South Wales Therapeutic Advisory Group.[44]  
31  
32  
33  
34

### 35 **RAND/UCLA appropriateness method**

36 The RAND/UCLA appropriateness method has been used to rate lists ranging up to over  
37 3000 indications, where panellists have been asked to use the clinical literature and their best  
38 clinical judgement to assess the appropriateness of performing a procedure. To do this, they  
39 have rated various clinical scenarios.[45] While the number and type of our criteria may differ  
40 to this, similar criteria have been developed using the RAND/UCLA method. For example, in  
41 the development of indicators for patients undergoing total hip or total knee replacement, one  
42 of the 68 indicators stated that for such patients, “deep venous thrombosis prophylaxis should  
43 be provided for a minimum of two weeks after hospital discharge”.[46] In the development of  
44 indicators for hazardous prescribing for GPs using this method, one of the 34 indicators  
45 identified the hazardous use of “NSAID in a patient with heart failure”.[47] We therefore  
46 followed a similar protocol.  
47  
48  
49

### 50 **RAND/UCLA Appropriateness Method round one**

51 In October 2011 candidate panel members were emailed an explanation of the project and an  
52 invitation to participate. After acceptance, they were emailed a rating sheet consisting of 48  
53 criteria, and asked to rate each on a nine point scale. Ratings of 1-3 were classified as  
54 inappropriate, with a rating of one indicating the greatest degree of inappropriateness. Ratings  
55 of 7-9 were classified as appropriate, with a rating of nine indicating the greatest degree of  
56 appropriateness. Ratings of 4-6 were classified as neither appropriate nor inappropriate.  
57  
58  
59  
60

1  
2  
3 Appropriate was defined as “the expected health benefit exceeds the expected negative  
4 consequences by a sufficiently wide margin that criteria are worth following, exclusive of  
5 cost”. They also received a description of the way in which the criteria had been derived, and  
6 a comparison with other prescribing criteria.[25 ,29] Panel members were requested to amend  
7 the wording or delete, update or identify missing criteria as required. Upon return of the  
8 rating sheets, results were tabulated. Agreement was based on four or less panellists rating  
9 outside the three-point region containing the median (1-3; 4-6; 7-9), and disagreement was  
10 based on five or more panellists rating in each extreme (1-3 and 7-9) , as per the  
11 RAND/UCLA protocol for a fifteen member panel Additionally, the 30th and 70th  
12 percentiles adjusted for symmetry were computed for each of the criteria, as it has been  
13 found that when ratings were symmetric with respect to the middle (five on the 1-9 scale), the  
14 interpercentile range (IPR) required to label an indication as disagreement was smaller than  
15 when they were asymmetric with respect to the middle (values far from five on the 1-9 scale).  
16 Agreement occurred when the interpercentile range adjusted for symmetry (IPRAS) was  
17 greater than the IPR [38]  
18  
19  
20  
21  
22  
23

### 24 **Rand/UCLA Appropriateness Method round two**

25 In November 2011, a face-to-face meeting of the expert panel, chaired by a panel moderator  
26 experienced in facilitating group discussions and criteria development, met to discuss the  
27 results of round one and re-rate each of the criteria and any potential additional criteria. One  
28 pharmacist, one staff geriatrician and a disease management advisor for a therapeutics  
29 publication could not attend, resulting in a twelve member panel. For this meeting, each panel  
30 member was provided with a copy of the results from round one. This consisted of the  
31 frequency distribution of ratings of all panellists across the 9-point scale, the overall panel  
32 median rating for each of the criteria and, for each panellist, an annotation of how they had  
33 rated each of the criteria. Scores from other panel members were not revealed. Depending  
34 upon panellists votes, panel agreement or disagreement was also stated for each of the round  
35 one criterion.  
36  
37  
38  
39

40 Discussion at round two occurred on the level of agreement for each of the criteria. In  
41 addition, discussion was facilitated on the wording of each of the criteria to improve clarity  
42 and decide whether agreement would be reached. The definitions of agreement and  
43 disagreement were adjusted for the smaller second round twelve member panel.[38]  
44 Agreement was reached when three or less panel members voted outside the 3-point region  
45 containing the median, or when the IPRAS was greater than the IPR. Disagreement was  
46 determined when four or more panellists rated in each extreme (1-3 and 7-9). Each of the  
47 criteria were then discussed, with panellists having the opportunity of changing their ratings  
48 if, for example, misinterpretation had occurred because of the way in which the criteria had  
49 been written, or if new evidence had become available, or if criteria had been interpreted in  
50 the light of a panellists own clinical experience. Each panel member consented to audio  
51 recording of the discussion. Values for the median, IPR and IPRAS were computed.[38]  
52  
53  
54  
55

### 56 **Data analysis**

57  
58  
59  
60

Median values, IPR and IPRAS were computed using SPSS version 20 (SPSS, Chicago, IL, USA). Audio recordings were transcribed.

## RESULTS

After round one, there was agreement on the appropriateness of 31 of the 48 criteria, and disagreement for 17 criteria. Discussion at round two resulted in retention of 10 criteria for which there had been disagreement after round one, acceptance of 14 of the original criteria with no change, deletion of nine criteria, and addition of two new criteria, resulting in 41 validated criteria.

An example of how the RAND/UCLA method was applied to each of our criteria is described in Table 1 for indicator one. The larger the IPRAS, the less asymmetric are the ratings. For example, thirteen of fifteen panellists at round one rated indicator fourteen with a score of eight or nine, for which the IPRAS was 8.35.

Table 2 lists the median panel ratings, the amount of dispersion of panel ratings, and whether there was agreement or disagreement for the original criteria and the validated criteria. It also lists the amendments made by the panel to the original criteria, and the reasons for these amendments. There was 100% agreement for both median panel ratings and dispersion of panel ratings for the validated criteria. Table 3 contains the final list of validated criteria, arranged according to disease states. Table 4 lists usage information judged to be necessary for certain criteria.

| Table 1 An example of the application of the RAND/UCLA appropriateness method to one criteria (indicator one) from round one |                                                   |                                                       |                                                                                                          |
|------------------------------------------------------------------------------------------------------------------------------|---------------------------------------------------|-------------------------------------------------------|----------------------------------------------------------------------------------------------------------|
| Nine point scale where 1-3 = inappropriate, 4-6 = neither appropriate nor inappropriate, 7-9 = appropriate                   | Number of panellists rating this indicator (n=15) | Calculations, interpercentile range method[38]        | Interpretation                                                                                           |
| 1                                                                                                                            |                                                   | 30 <sup>th</sup> percentile = <b>7.0</b>              | This indicator was accepted according to the median method because four or less panellists voted outside |
| 2                                                                                                                            |                                                   | 70 <sup>th</sup> percentile = <b>8.0</b>              |                                                                                                          |
| 3                                                                                                                            | 1                                                 | Interpercentile range (IPR) =                         |                                                                                                          |
| 4                                                                                                                            |                                                   | 70 <sup>th</sup> minus 30 <sup>th</sup> percentile) = |                                                                                                          |
| 5                                                                                                                            | 1                                                 | <b>1.0</b> Interpercentile range                      |                                                                                                          |

|   |                 |                                                                                                                                                                                                                                                                                                                                                                                                                                              |                                                                                                                                                                                                         |
|---|-----------------|----------------------------------------------------------------------------------------------------------------------------------------------------------------------------------------------------------------------------------------------------------------------------------------------------------------------------------------------------------------------------------------------------------------------------------------------|---------------------------------------------------------------------------------------------------------------------------------------------------------------------------------------------------------|
| 6 | 1               | central point (IPRCP) = 30 <sup>th</sup><br>+ 70 <sup>th</sup> percentile divided by 2<br>= <b>7.5</b><br>Asymmetry index (AI) = [5<br>minus IPRCP] (as an<br>absolute value) = <b>2.5</b><br>Interpercentile range<br>adjusted for symmetry<br>(IPRAS) = [2.5 plus (AI x<br>1.5)] = <b>6.1</b> , where 2.5 is the<br>IPR required for<br>disagreement when perfect<br>symmetry exists, and 1.5 is<br>the correction factor for<br>asymmetry | the 3 point region<br>containing the median.<br><br>The IPRAS (6.1) was<br>greater than the IPR<br>(1.0) indicating no<br>disagreement. The<br>larger the IPRAS, the<br>less asymmetric the<br>ratings. |
| 7 | 5               |                                                                                                                                                                                                                                                                                                                                                                                                                                              |                                                                                                                                                                                                         |
| 8 | 5               |                                                                                                                                                                                                                                                                                                                                                                                                                                              |                                                                                                                                                                                                         |
| 9 | 2               |                                                                                                                                                                                                                                                                                                                                                                                                                                              |                                                                                                                                                                                                         |
|   | median =<br>7.0 |                                                                                                                                                                                                                                                                                                                                                                                                                                              |                                                                                                                                                                                                         |

For peer review only

1  
2  
3  
4  
5  
6  
7  
8  
9  
10  
11  
12  
13  
14  
15  
16  
17  
18  
19  
20  
21  
22  
23  
24  
25  
26  
27  
28  
29  
30  
31  
32  
33  
34  
35  
36  
37  
38  
39  
40  
41  
42  
43  
44  
45  
46  
47  
48  
49  
50  
51  
52  
53  
54  
55  
56  
57  
58  
59  
60

1  
2  
3  
4  
5  
6  
7  
8  
9  
10  
11  
12  
13  
14  
15  
16  
17  
18  
19  
20  
21  
22  
23  
24  
25  
26  
27  
28  
29  
30  
31  
32  
33  
34  
35  
36  
37  
38  
39  
40  
41  
42  
43  
44  
45  
46  
47  
48  
49

| Criteria Number | Original prescribing appropriateness criteria for older ( $\geq 65$ years) Australians              | Rating by median method[38] (median value, A= agreement, D= disagreement), n=15 |   | Rating by IPRAS <sup>1</sup> method[38] (IPR value, IPRAS value, A = agreement, D = disagreement), n=15 |   | Validated prescribing appropriateness criteria for older ( $\geq 65$ years) Australians             | Rating by median method[38] (median value, A= agreement, D= disagreement), n=12 |   | Rating by IPRAS <sup>1</sup> method[38] (IPR value, IPRAS value, A = agreement, D = disagreement), n=12 |   | Amendment/reason                                                                                                                                                                                                                          |
|-----------------|-----------------------------------------------------------------------------------------------------|---------------------------------------------------------------------------------|---|---------------------------------------------------------------------------------------------------------|---|-----------------------------------------------------------------------------------------------------|---------------------------------------------------------------------------------|---|---------------------------------------------------------------------------------------------------------|---|-------------------------------------------------------------------------------------------------------------------------------------------------------------------------------------------------------------------------------------------|
|                 |                                                                                                     |                                                                                 |   |                                                                                                         |   |                                                                                                     |                                                                                 |   |                                                                                                         |   |                                                                                                                                                                                                                                           |
| 1.              | Patient taking an antihypertensive is at their target blood pressure                                | 7                                                                               | A | 1.00, 6.10                                                                                              | A | Patient taking an antihypertensive is at the target blood pressure appropriate for them             | 8                                                                               | A | 1.10, 7.52                                                                                              | A | “Appropriate for them” added. Current blood pressure guidelines may not be appropriate for all older patients[48-50]. For example, in the oldest old[51]; in palliative care; and for those who are/become hypotensive and/or fall[52,53] |
| 2.              | Patient at high risk of a cardiovascular event is taking a statin                                   | 7                                                                               | A | 1.00, 6.10                                                                                              | A | Patient at high risk of a recurrent cardiovascular event is taking a statin                         | 8                                                                               | A | 1.00, 6.10                                                                                              | A | “Recurrent” added to ensure use in secondary prevention of cardiovascular events rather than primary prevention, where evidence is less clear, especially in the oldest old[26,54-58]                                                     |
| 3.              | Patient with IHD or a history of MI is taking a beta blocker                                        | 8                                                                               | A | 2.00, 6.85                                                                                              | A | Patient with CHD or a history of MI is taking a beta blocker                                        | 7                                                                               | A | 1.00, 6.10                                                                                              | A | “CHD” replaced “IHD”. The term “coronary heart disease” is preferred over “ischemic heart disease”                                                                                                                                        |
| 4.              | Patient with IHD or a history of MI is taking an antiplatelet agent unless on an oral anticoagulant | 8                                                                               | A | 1.00, 7.60                                                                                              | A | Patient with CHD or a history of MI is taking an antiplatelet agent unless on an oral anticoagulant | 8                                                                               | A | 1.00, 7.60                                                                                              | A | “CHD” replaced “IHD”. The term “coronary heart disease” is preferred over “ischemic heart disease”                                                                                                                                        |
| 5               | Patient with heart failure is taking a beta blocker                                                 | 7                                                                               | A | 1.00, 6.10                                                                                              | A | Patient with stable heart failure with left systolic ventricular dysfunction (HF-                   | 8                                                                               | A | 0.10, 6.78                                                                                              | A | Description of heart failure amended. The use of beta blockers is contra-indicated in                                                                                                                                                     |

|     |                                                                                                                    |   |   |               |   |                                                                                                                        |   |   |               |   |                                                                                                                                                            |
|-----|--------------------------------------------------------------------------------------------------------------------|---|---|---------------|---|------------------------------------------------------------------------------------------------------------------------|---|---|---------------|---|------------------------------------------------------------------------------------------------------------------------------------------------------------|
|     |                                                                                                                    |   |   |               |   | LVSD) is taking a beta blocker                                                                                         |   |   |               |   | unstable heart failure. The optimal treatment of heart failure with preserved ejection fraction (HFPEF) is uncertain at this time[59 ,60]                  |
| 6.  | Patient with heart failure is taking an ACEI or A2A                                                                | 8 | A | 2.00<br>6.85  | A | Patient with stable heart failure with left systolic ventricular dysfunction (HF-LVSD) is taking an ACEI or A2A        | 9 | A | 1.00,<br>7.60 | A | Description of heart failure amended. The optimal treatment of heart failure with preserved ejection fraction (HFPEF) is uncertain at this time[59 ,60]    |
| 7.  | Patient with heart failure is NOT taking medications which may exacerbate heart failure                            | 9 | A | 1.00,<br>7.60 | A | Patient with HF-LVSD or HFPEF is NOT taking medications which may exacerbate heart failure                             | 9 | A | 0.10,<br>8.27 | A | Description of heart failure amended. The types of medicines contraindicated in HF-LVSD and HFPEF may not be identical[61 ,62]                             |
| 8   | Patient with heart failure or hypertension is NOT taking high sodium medications                                   | 8 | D | 2.20,<br>5.50 | A | Deleted                                                                                                                | - |   | -             | - | High sodium medicines (among others) in heart failure are addressed by indicator 7. In hypertension, they are addressed as lifestyle modifications[63 ,64] |
| 9.  | Patient with AF is taking an oral anticoagulant                                                                    | 7 | D | 2.0,<br>5.35  | A | Patient with AF is taking an oral anticoagulant or an antiplatelet agent, depending upon stroke risk and bleeding risk | 8 | A | 0.10,<br>6.93 | A | An antiplatelet agent may be appropriate for patients at low risk of stroke. Bleeding risk may determine choice of antithrombotic agent[50 ,65 ,66]        |
| 10. | Patient with AF taking an anticoagulant has an INR between 2 – 3                                                   | 8 | A | 2.20,<br>6.70 | A | Patient taking warfarin for AF has an INR between 2-3                                                                  | 9 | A | 1.00,<br>7.60 | A | New anticoagulants like rivaroxaban and dabigatran do not require INR monitoring                                                                           |
| 11. | Patient with a history of non-hemorrhagic stroke or TIA is taking an antiplatelet agent unless on an anticoagulant | 8 | A | 1.00,<br>7.60 | A | Patient with a history of non-hemorrhagic stroke or TIA is taking an antiplatelet agent unless on an anticoagulant     | 9 | A | 1.00,<br>7.60 | A | No change                                                                                                                                                  |
| 12. | Patient with risk factors for myopathy is NOT taking                                                               | 7 | D | 3.00,<br>4.60 | A | Patient with risk factors for statin induced myopathy is                                                               | 8 | A | 1.10,<br>7.52 | A | The use of all high dose high potency statins together with                                                                                                |



|     |                                                                                                                         |   |   |            |   |                                                                                                                                           |   |   |            |   |                                                                                                                                                                                                                                          |
|-----|-------------------------------------------------------------------------------------------------------------------------|---|---|------------|---|-------------------------------------------------------------------------------------------------------------------------------------------|---|---|------------|---|------------------------------------------------------------------------------------------------------------------------------------------------------------------------------------------------------------------------------------------|
|     | 40mg or more per day of simvastatin or atorvastatin                                                                     |   |   |            |   | not taking a high dose of a high potency statin                                                                                           |   |   |            |   | risk factors may increase the likelihood of myopathy[50 ,67 ,68]                                                                                                                                                                         |
| 13. | Patient with cardiovascular disease is NOT taking an NSAID                                                              | 7 | A | 1.20, 5.95 | A | Patient with cardiovascular disease is NOT taking an NSAID                                                                                | 8 | A | 1.10, 6.18 | A | No change                                                                                                                                                                                                                                |
| 14. | Patient with cardiovascular, respiratory disease or diabetes who smokes has been offered smoking cessation therapy      | 9 | A | 0.00, 8.35 | A | Patient with cardiovascular, respiratory disease or diabetes who smokes has been offered smoking cessation options                        | 9 | A | 0.00, 8.35 | A | “Therapy” implies pharmacotherapy, whereas repeated counselling/psychotherapy may be preferred to avoid the risks associated with polypharmacy                                                                                           |
| 15. | Patient with type 2 diabetes and hypertension and albuminuria is taking an ACEI or A2A                                  | 8 | A | 2.00, 6.85 | A | Patient with type 2 diabetes and hypertension and albuminuria is taking an ACEI or A2A                                                    | 9 | A | 1.00, 7.60 | A | No change.                                                                                                                                                                                                                               |
| 16. | Patient with diabetes at high risk of a cardiovascular event is taking an antiplatelet agent unless on an anticoagulant | 7 | D | 2.20, 5.50 | A | Patient with diabetes at high risk of a cardiovascular event is taking an antiplatelet agent unless on an anticoagulant                   | 9 | A | 1.00, 7.60 | A | No change                                                                                                                                                                                                                                |
| 17. | Patient with diabetes is NOT taking a medication which may increase or decrease blood glucose concentrations            | 5 | D | 2.20, 3.70 | A | Patient with diabetes receiving medications that may affect glycemic control is having regular monitoring of blood glucose concentrations | 9 | A | 1.00, 7.60 | A | Increased awareness and monitoring may require adjustment of hypoglycemic medication doses, depending upon the need to continue interacting medicines. For example, commencement of oral corticosteroids may worsen diabetes control[43] |
| 18. | Patient with diabetes has had an HbA1c measurement within the previous 6 months                                         | 8 | A | 1.20, 7.45 | A | Patient with diabetes has had an HbA1c measurement within the previous 6 months                                                           | 8 | A | 1.00, 7.60 | A | No change                                                                                                                                                                                                                                |
| 19. | Patient taking metformin for diabetes has had the dose adjusted for                                                     | 8 | A | 1.20, 7.45 | A | Patient taking metformin for diabetes has had the dose adjusted for renal function                                                        | 9 | A | 1.00, 7.60 | A | Creatinine clearance may represent only one of the methods used to determine                                                                                                                                                             |

|     |                                                                                                         |   |      |            |   |                                                                                                                       |   |   |            |   |                                                                                                                                                                                                                                |
|-----|---------------------------------------------------------------------------------------------------------|---|------|------------|---|-----------------------------------------------------------------------------------------------------------------------|---|---|------------|---|--------------------------------------------------------------------------------------------------------------------------------------------------------------------------------------------------------------------------------|
|     | creatinine clearance                                                                                    |   |      |            |   |                                                                                                                       |   |   |            |   | renal function                                                                                                                                                                                                                 |
| 20. | Patient taking metformin for diabetes is NOT concurrently taking glibenclamide                          | 6 | D    | 2.40, 3.85 | A | Deleted                                                                                                               | - |   | -          | - | Glibenclamide is an uncommonly used hypoglycaemic                                                                                                                                                                              |
| 21. | Patient with OA pain interfering with daily activities has been trialled on paracetamol 2 – 4 g per day | 8 | A    | 2.00, 6.85 | A | Patient with OA pain interfering with daily activities has been trialled on regular paracetamol 2 – 4 g per day       | 9 | A | 0.40, 8.05 | A | “Regular” paracetamol added to improve quality of indicator                                                                                                                                                                    |
| 22. | Patient taking analgesic(s) does NOT have pain that interferes with daily activities                    | 7 | D    | 3.2, 4.75  | A | Patient taking analgesic(s) has had the dose(s) titrated in order to avoid pain that interferes with daily activities | 8 | A | 2.00, 6.85 | A | Indicator rephrased to improve clarity                                                                                                                                                                                         |
| 23. | Patient taking an opioid is on prophylactic treatment for constipation                                  | 8 | A    | 2.00, 6.85 | A | Patient taking a regular opioid is on prophylactic treatment for constipation                                         | 9 | A | 1.00, 7.60 | A | “Regular” use added as “when required” use may not always require prophylactic treatment                                                                                                                                       |
| 24. | Patient with risk factors for impaired renal function is NOT taking an NSAID                            | 8 | A    | 1.00, 7.60 | A | Patient with risk factors for impaired renal function is NOT taking an NSAID                                          | 8 | A | 1.00, 7.60 | A | No change                                                                                                                                                                                                                      |
| 25. | Patient is NOT concurrently taking an ACEI or A2A, diuretic and NSAID (excluding low dose aspirin)      | 9 | A    | 1.00, 7.60 | A | Patient is NOT concurrently taking an ACEI or A2A, diuretic and NSAID (excluding low dose aspirin)                    | 9 | A | 1.00, 7.60 | A | No change                                                                                                                                                                                                                      |
| 26. | Patient with sleep disturbance or anxiety has NOT been taking benzodiazepines for > 4 weeks             | 8 | A    | 1.20, 7.45 | A | Patient has NOT been taking benzodiazepines for > 4 weeks                                                             | 9 | A | 1.00, 7.60 | A | “Sleep disturbance or anxiety” deleted. Benzodiazepines increase the risk of oversedation, ataxia, confusion, falls, respiratory depression and short-term memory impairment, and are recommended for short term use only[43]. |
| 27. | Patient with depression is NOT taking                                                                   | 7 | 7, D | 1.00, 4.60 | A | Deleted                                                                                                               | - |   | -          | - | The issue of anticholinergic burden is addressed by                                                                                                                                                                            |

|     |                                                                                                               |   |   |            |   |                                                                                                                 |   |   |            |   |                                                                                                 |
|-----|---------------------------------------------------------------------------------------------------------------|---|---|------------|---|-----------------------------------------------------------------------------------------------------------------|---|---|------------|---|-------------------------------------------------------------------------------------------------|
|     | anticholinergic type antidepressants                                                                          |   |   |            |   |                                                                                                                 |   |   |            |   | indicator 32                                                                                    |
| 28. | Patient with a history of falls is NOT taking psychotropic medications                                        | 8 | A | 1.00, 6.10 | A | Patient with a history of falls is NOT taking psychotropic medications                                          | 8 | A | 1.40, 6.40 | A | No change                                                                                       |
| 29. | Patient taking an SSRI is NOT concurrently taking medications known to increase the risk of GI bleeding       | 7 | D | 2.20, 5.20 | A | Deleted                                                                                                         | - |   | -          | - | Redundant indicator. This issue would be identified by indicator 47.                            |
| 30. | Patient taking an SSRI is NOT concurrently taking other medications that may contribute to serotonin toxicity | 8 | A | 2.20, 6.70 | A | Patient taking an SSRI is NOT concurrently taking other medications that may contribute to serotonin toxicity   | 8 | A | 1.40, 6.40 | A | No change. Retained by panel due to its potential significance, despite the use of indicator 47 |
| 31. | Patient with dementia is NOT receiving anticholinergic medication                                             | 8 | A | 1.20, 7.45 | A | Patient with dementia is NOT receiving anticholinergic medication                                               | 8 | A | 1.00, 7.60 | A | No change                                                                                       |
| 32. | Patient is NOT taking more than one medication with anticholinergic activity                                  | 8 | A | 0.2, 6.70  | A | Patient is not taking medication with SIGNIFICANT anticholinergic activity                                      | 8 | A | 0.40, 7.15 | A | Rewording focuses on the issue of anticholinergic burden                                        |
| 33. | Patient taking a PPI is NOT taking a medication that may cause dyspepsia                                      | 7 | D | 3.20, 4.45 | A | Patient taking a PPI is NOT taking a medication that may cause dyspepsia unless prescribed for gastroprotection | 8 | A | 0.40, 7.15 | A | “Unless prescribed for gastroprotection” added to improve the accuracy of the indicator         |
| 34. | Patient with COPD is NOT taking benzodiazepines                                                               | 7 | D | 3.00, 6.10 | A | Patient with COPD is NOT taking benzodiazepines                                                                 | 8 | A | 1.00, 6.10 | A | No change                                                                                       |
| 35. | Patient with asthma using an inhaled LABA is also using an inhaled corticosteroid                             | 9 | A | 0.20, 8.20 | A | Patient with asthma using an inhaled LABA is also using an inhaled corticosteroid                               | 9 | A | 1.00, 7.60 | A | No change                                                                                       |
| 36. | Patient using salbutamol or terbutaline inhaler more                                                          | 9 | A | 1.00, 7.60 | A | Patient using salbutamol or terbutaline inhaler more than                                                       | 9 | A | 0.40, 8.05 | A | “Except for exercise-induced asthma” added to improve the                                       |

|     |                                                                                                                                                 |   |      |            |   |                                                                                                                 |   |   |            |   |                                                                                                                          |
|-----|-------------------------------------------------------------------------------------------------------------------------------------------------|---|------|------------|---|-----------------------------------------------------------------------------------------------------------------|---|---|------------|---|--------------------------------------------------------------------------------------------------------------------------|
|     | than 3 times per week for reversible airways disease has been prescribed an ICS                                                                 |   |      |            |   | 3 times per week for reversible airways disease has been prescribed an ICS (except for exercise-induced asthma) |   |   |            |   | accuracy of the indicator                                                                                                |
| 37. | Patient with asthma is NOT taking a medication that may worsen asthma                                                                           | 7 | A    | 1.20, 6.25 | A | Patient with asthma is NOT taking a medication that may worsen asthma                                           | 8 | A | 1.00, 7.60 | A | No change                                                                                                                |
| 38. | Female patient with recurrent UTIs has been prescribed intravaginal estrogen                                                                    | 5 | D    | 2.00, 3.85 | A | Deleted                                                                                                         | - |   | -          | - | Evidence for this indicator was judged to be poor[69]                                                                    |
| 39. | Patient with a creatinine clearance < 60 ml/min is NOT receiving nitrofurantoin for UTI                                                         | 8 | A    | 2.00, 6.85 | A | Patient with a UTI is not receiving nitrofurantoin or hexamine for prophylaxis or acute treatment               | 8 | A | 1.00, 7.60 | A | Hexamine and nitrofurantoin are not recommended for the prophylactic or acute treatment of UTI in older patients[43 ,50] |
| 40. | Patient with a creatinine clearance < 50ml/min is NOT receiving hexamine for UTI prophylaxis                                                    | 8 | A    | 1.20, 6.25 | A | Deleted                                                                                                         | - | - | -          | - | Hexamine and are not recommended for the prophylactic treatment of UTI in older patients[43 ,50].                        |
| 41. | Patient with an URTI is NOT receiving antibiotics                                                                                               | 7 | 7, D | 3.00, 4.60 | A | Patient with a non-specific URTI is NOT receiving antibiotics                                                   | 8 | A | 1.00, 7.60 | A | “non-specific” added to improve the accuracy of the indicator                                                            |
| 42. | Patient with osteoporosis who is not receiving at least 600 IU Vitamin D daily from dietary sources is receiving supplementation with vitamin D | 8 | D    | 3.20, 4.75 | A | Deleted                                                                                                         | - |   | -          | - | This indicator is covered by indicator 44 and an expanded footnote                                                       |
| 43. | Patient with osteoporosis who is not receiving at least 1200 mg of calcium daily from dietary sources is receiving calcium                      | 8 | A    | 1.60, 5.95 | A | Deleted                                                                                                         | - |   | -          | - | This indicator is covered by indicator 44 and an expanded footnote                                                       |

|     |                                                                                                                    |   |   |            |   |                                                                                                                                                 |   |   |            |   |                                                                                                                                                                                                                                                                                                                                           |
|-----|--------------------------------------------------------------------------------------------------------------------|---|---|------------|---|-------------------------------------------------------------------------------------------------------------------------------------------------|---|---|------------|---|-------------------------------------------------------------------------------------------------------------------------------------------------------------------------------------------------------------------------------------------------------------------------------------------------------------------------------------------|
|     | supplementation                                                                                                    |   |   |            |   |                                                                                                                                                 |   |   |            |   |                                                                                                                                                                                                                                                                                                                                           |
| 44. | Patient with osteoporosis is receiving anti-osteoporotic medication                                                | 7 | A | 1.00, 6.10 | A | Patient with osteoporosis is receiving appropriate anti-osteoporotic medication                                                                 | 8 | A | 0.40, 7.15 | A | “Appropriate” added and an expanded footnote to include calcium and vitamin D                                                                                                                                                                                                                                                             |
| 45. | Patient using topical corticosteroids does NOT have itch or discomfort that interferes with daily activities       | 6 | D | 2.00, 5.35 | A | Patient using topical corticosteroids for contact or allergic dermatitis does not have itch or discomfort that interferes with daily activities | - |   | -          | - | This indicator was deleted by the panel because there was no identification of the diagnosis/condition being treated. However, contact and allergic dermatitis is one of the top 40 most frequently managed problems by general practitioners in patients ≥ 65 years old in Australia,[40] so this indicator was re-worded by the authors |
| 46. | Patient has received influenza and pneumococcal vaccination                                                        | 9 | A | 1.00, 7.60 | A | Patient has received influenza and pneumococcal vaccination                                                                                     | 9 | A | 0.00, 8.35 | A | No change                                                                                                                                                                                                                                                                                                                                 |
| 47. | Patient has no <i>significant</i> medication interactions (agreement between two medication interaction databases) | 8 | D | 3.00, 6.10 | A | Patient has no <i>clinically significant</i> medication interactions (agreement between two medication interaction databases)                   | 8 | A | 0.40, 7.15 | A | “Clinically” added to improve the accuracy of the indicator                                                                                                                                                                                                                                                                               |
| 48. | Patient has had no <i>significant</i> change in medications in the previous 90 days                                | 5 | D | 1.20, 3.25 | A | Deleted                                                                                                                                         | - |   | -          | - | It was preferred to transfer this information to the explanatory text of the article                                                                                                                                                                                                                                                      |
| New |                                                                                                                    |   |   |            |   | Patient taking thyroid hormone replacement therapy has had a serum TSH measurement within the previous 12 months                                |   |   |            |   | Thyroid disease is a common medical condition managed by GPs in older Australians[40,70]                                                                                                                                                                                                                                                  |
| New |                                                                                                                    |   |   |            |   | Patient with coronary heart disease is taking an ACEI or A2A                                                                                    |   |   |            |   | ACEIs or A2As reduce the risk of cardiovascular events[71,72]. However, a high incidence of comorbid disease                                                                                                                                                                                                                              |





Table 3 Validated prescribing appropriateness criteria for older Australians ( $\geq 65$  years) for commonly used medications and medical conditions<sup>a,b,c</sup> (\*for usage information for certain criteria, see Table 4)

| Criteria No. | Validated criteria                                                                                                                                                        |
|--------------|---------------------------------------------------------------------------------------------------------------------------------------------------------------------------|
| 1            | Patient taking an antihypertensive is at the target blood pressure appropriate for them*                                                                                  |
| 2            | Patient at high risk of a recurrent cardiovascular event is taking a statin*                                                                                              |
| 3            | Patient with CHD or a history of MI is taking a beta blocker                                                                                                              |
| 4            | Patient with CHD or a history of MI is taking an antiplatelet agent unless taking an oral anticoagulant*                                                                  |
| 5            | Patient with CHD is taking an ACEI or A2A*                                                                                                                                |
| 6            | Patient with stable heart failure with HF-LVSD is taking a beta blocker                                                                                                   |
| 7            | Patient with stable heart failure with HF-LVSD is taking an ACEI or A2A*                                                                                                  |
| 8            | Patient with HF-LVSD or HFPEF is NOT taking medications which may exacerbate heart failure                                                                                |
| 9            | Patient with AF is taking an oral anticoagulant or an antiplatelet agent, depending upon stroke risk and bleeding risk*                                                   |
| 10           | Patient taking warfarin for AF has an INR between 2-3                                                                                                                     |
| 11           | Patient with a history of non-hemorrhagic stroke or TIA is taking an antiplatelet agent unless taking an anticoagulant                                                    |
| 12           | Patient with risk factors for statin induced myopathy is not taking a high dose of a high potency statin*                                                                 |
| 13           | Patient with cardiovascular disease is NOT taking an NSAID                                                                                                                |
| 14           | Patient with cardiovascular, respiratory disease or diabetes who smokes has been offered smoking cessation options*                                                       |
| 15           | Patient with type 2 diabetes and hypertension and albuminuria is taking an ACEI or A2A                                                                                    |
| 16           | Patient with diabetes at high risk of a cardiovascular event is taking an antiplatelet agent unless on an anticoagulant                                                   |
| 17           | Patient with diabetes taking medications that may affect glycemic control is receiving regular monitoring of blood glucose concentrations*                                |
| 18           | Patient with diabetes has had an HbA1c measurement within the previous 6 months*                                                                                          |
| 19           | Patient taking metformin for diabetes has had the dose adjusted for renal function*                                                                                       |
| 20           | Patient taking thyroid hormone replacement therapy has had a serum TSH measurement within the previous 12 months                                                          |
| 21           | Patient with OA pain interfering with daily activities has been trialled on regular paracetamol 2 – 4 g per day                                                           |
| 22           | Patient taking analgesic(s) has had the dose(s) titrated in order to avoid pain that interferes with daily activities                                                     |
| 23           | Patient taking a regular opioid is on prophylactic treatment for constipation                                                                                             |
| 24           | Patient with risk factors for impaired renal function is NOT taking an NSAID*                                                                                             |
| 25           | Patient is NOT concurrently taking an ACEI or A2A, diuretic and NSAID (excluding low dose aspirin)                                                                        |
| 26           | Patient has NOT been taking benzodiazepines for > 4 weeks*                                                                                                                |
| 27           | Patient with a history of falls is NOT taking psychotropic medications*                                                                                                   |
| 28           | Patient taking an SSRI is NOT concurrently taking other medications that may contribute to serotonin toxicity*                                                            |
| 29           | Patient with dementia is NOT receiving anticholinergic medication*                                                                                                        |
| 30           | Patient is not taking medication with SIGNIFICANT anticholinergic activity*                                                                                               |
| 31           | Patient taking a PPI is NOT taking a medication that may cause dyspepsia unless prescribed for gastroprotection*                                                          |
| 32           | Patient with COPD is NOT taking benzodiazepines                                                                                                                           |
| 33           | Patient with asthma using an inhaled LABA is also using an inhaled corticosteroid                                                                                         |
| 34           | Patient using salbutamol or terbutaline inhaler more than 3 times per week for reversible airways disease has been prescribed an ICS (except for exercise-induced asthma) |
| 35           | Patient with asthma is NOT taking a medication that may worsen asthma*                                                                                                    |
| 36           | Patient with a UTI is not receiving nitrofurantoin or hexamine for prophylaxis or acute treatment                                                                         |
| 37           | Patient with a non-specific URTI is NOT receiving antibiotics*                                                                                                            |
| 38           | Patient with osteoporosis is receiving appropriate anti-osteoporotic medication*                                                                                          |

|    |                                                                                                                                                 |
|----|-------------------------------------------------------------------------------------------------------------------------------------------------|
| 39 | Patient has received influenza and pneumococcal vaccination                                                                                     |
| 40 | Patient using topical corticosteroids for contact or allergic dermatitis does not have itch or discomfort that interferes with daily activities |
| 41 | Patient has no <i>clinically significant</i> medication interactions (agreement between two medication interaction databases)*                  |

a – These criteria are intended to be used by appropriately trained and qualified health professionals, as a tool to assist in making medication management decisions as part of the medication review process

b – Prior to the commencement of any medication, the contraindications and precautions for that medication should be considered

c – The intended result of using these criteria is the reasonable and appropriate medication management of individual patients, rather than the systematic application of these criteria to all patients irrespective of other considerations

A2A = angiotensin 2 receptor antagonist, ACEI = angiotensin converting enzyme inhibitor, AF = atrial fibrillation, CHD = coronary heart disease, COPD = chronic obstructive pulmonary disease, HbA1c = glycosylated haemoglobin, HF-LVSD = Heart failure with left ventricular systolic dysfunction, HFPEF = heart failure with preserved ejection fraction, ICS = inhaled corticosteroid, INR = international normalised ratio, MI = myocardial infarct, LABA = long acting beta agonist, NSAID = non-steroidal anti-inflammatory drug, PPI = proton pump inhibitor, SSRI = selective serotonin reuptake inhibitor, TIA = transient ischemic attack, TSH = thyroid stimulating hormone, UTI = urinary tract infection.

| Criteria No. | Description of issue                                                            | Details                                                                                                                                                                                                                                                                                                                                                                                                                                                                                              |
|--------------|---------------------------------------------------------------------------------|------------------------------------------------------------------------------------------------------------------------------------------------------------------------------------------------------------------------------------------------------------------------------------------------------------------------------------------------------------------------------------------------------------------------------------------------------------------------------------------------------|
| 1            | Blood pressure targets (mm Hg)                                                  | Proteinuria >1 g/day (with or without diabetes) < 125/75. CHD, diabetes, chronic kidney disease, proteinuria (> 300mg/day), stroke or TIA < 130/80. Others <140/90[43] Current blood pressure guidelines may not be appropriate for all older patients, such as the oldest old; in palliative care; and for those who are/become hypotensive and/or fall[48 ,50-53 ,74]                                                                                                                              |
| 2            | Patients at high risk of a cardiovascular event (> 15% within the next 5 years) | Age > 75 years; history of diabetes, moderate or severe chronic kidney disease (persistent proteinuria, GFR < 60ml/min, eGFR < 45 ml/min/1.73m <sup>2</sup> ), hypercholesterolemia (familial, TC > 7.5 mmol/L), SBP ≥ 180 or DBP ≥ 110 mmHg, ISH (SBP ≥160 and DBP ≤70 mmHg), coronary heart disease, stroke, TIA, PAD, heart failure, aortic disease, LVH, family history of premature CVD.[43 ,75] The benefits of statins and risks of adverse effects are uncertain towards the end of life[76] |
| 4            | Antiplatelet agents and oral anticoagulants                                     | Antiplatelet agents – aspirin, clopidogrel, dipyridamole, ticlopidine. Oral anticoagulants – dabigatran, phenindione, rivaroxaban, warfarin                                                                                                                                                                                                                                                                                                                                                          |
| 5            | Use of ACEI or A2A in CHD                                                       | A high incidence of comorbid disease in CHD (typically arthritis and/or respiratory disease) or other clinical factors (e.g. dizziness or falls, cognitive impairment, use of > 5 medicines, patient preference) may be considerations in determining medication prescribing priorities[23 ,27 ,73]                                                                                                                                                                                                  |
| 7            | Medications that may exacerbate heart failure                                   | HF-LVSD – anti-arrhythmic medicines (except for heart failure-specific beta-blockers and amiodarone), non-dihydropyridine calcium-channel blockers (e.g. verapamil or diltiazem), clozapine, corticosteroids, NSAIDs (excluding low dose aspirin), thiazolidinediones, TNF-alpha inhibitors, topical beta blockers (when added to systemic beta blockers), tricyclic antidepressants[50 ,77 ,78]. HFPEF – venodilators (e.g. isosorbide dinitrate), potent arterial                                  |

|           |                                                                     |                                                                                                                                                                                                                                                                                                                                                                                                                                                                    |
|-----------|---------------------------------------------------------------------|--------------------------------------------------------------------------------------------------------------------------------------------------------------------------------------------------------------------------------------------------------------------------------------------------------------------------------------------------------------------------------------------------------------------------------------------------------------------|
|           |                                                                     | vasodilators (e.g. hydralazine), digoxin (unless AF), excessive use of diuretics. Note; verapamil and diltiazem may improve diastolic function in HFPEF[61]                                                                                                                                                                                                                                                                                                        |
| 9         | Stroke risk and bleeding risk                                       | Stroke risk can be calculated using CHADS <sub>2</sub> or CHA <sub>2</sub> DS <sub>2</sub> -VASc.[79] Risk factors for coumarin-related bleeding complications: advanced age, uncontrolled hypertension, history of MI or IHD, cerebrovascular disease, anaemia or a history of bleeding, concomitant use of aspirin/polypharmacy[80]                                                                                                                              |
| 12        | Risk factors for statin myopathy; high dose of high potency statins | Age > 70 years, presence of disease states (diabetes, hypothyroidism, renal and hepatic disease), concurrent use of cyclosporin, fibrates, CYP3A4 inhibitors (e.g. diltiazem, macrolides, protease inhibitors, verapamil [except for pravastatin and rosuvastatin], severe intercurrent illness (infection, trauma, metabolic disorder), dose ≥ 40 mg daily. High dose of high potency statins ; ≥ 40 mg atorvastatin or simvastatin; > 10mg rosuvastatin [43 ,81] |
| 14        | Smoking cessation options                                           | Counselling (extended, brief, telephone), support services (professional, family, social, work), pharmacotherapy.                                                                                                                                                                                                                                                                                                                                                  |
| 17        | Medications that may affect glycemic control                        | Increase blood glucose: baclofen, clozapine, cyclosporin, glucocorticoids, haloperidol, olanzapine, paliperidone, phenytoin, protease inhibitors, quetiapine, risperidone, sirolimus, tacrolimus, and tricyclic antidepressants. Decrease blood glucose: excessive alcohol, disopyramide, perhexiline, quinine, trimethoprim/sulphamethoxazole[43]                                                                                                                 |
| 18        | Six monthly HbA1c measurements                                      | Treatment intensification in response to less than optimally controlled HbA1c may be inappropriate in patients with limited life expectancy or in frail older patients[82 ,83]                                                                                                                                                                                                                                                                                     |
| 19        | Metformin dose                                                      | Based on creatinine clearance: 60-90 ml/min, maximum 2g daily; 30-60 ml/min, maximum 1g daily; < 30 ml/min avoid use.[43] Based on eGFR: Review dose if eGFR< 45 ml/min/1.73m <sup>2</sup> ; avoid if eGFR<30 ml/min/1.73m <sup>2</sup> [84]                                                                                                                                                                                                                       |
| 24        | Risk factors for impaired renal function                            | Volume depletion, age > 60 years, salt-restricted diet, concomitant use of ACEIs, A2As, cyclosporin or aspirin, GFR ≤ 60 ml/min, cirrhosis, heart failure[85]                                                                                                                                                                                                                                                                                                      |
| 26        | Benzodiazepine use                                                  | Benzodiazepines increase the risk of oversedation, ataxia, confusion, falls, respiratory depression and short-term memory impairment, and are recommended for short term use only.[43]                                                                                                                                                                                                                                                                             |
| 27        | Falls and psychotropic medications                                  | Psychotropic medications = antidepressants (all), anxiolytics/hypnotics, antipsychotics.[86 ,87] Medications causing (postural) hypotension (e.g. cardiovascular medicines) or cognitive impairment (e.g. opioids) may also increase the risk of falls[50 ,88]                                                                                                                                                                                                     |
| 28        | Medications that may contribute to serotonin syndrome               | Antidepressants - desvenlafaxine, duloxetine, St John's wort, MAOIs (including moclobemide), SSRIs, TCAs, venlafaxine. Opioids - dextromethorphan, fentanyl, pethidine, tramadol. Others - selegiline, linezolid, lithium, tryptophan[43]                                                                                                                                                                                                                          |
| 29 and 30 | Medications with significant anticholinergic activity               | amantadine, amitriptyline, atropine*, belladonna alkaloids*, benzhexol, benzotropine, biperiden, brompheniramine*, chlorpheniramine, chlorpromazine, clomipramine, clozapine, cyclizine, cyclopentolate, cyproheptadine*, darifenacin, dexchlorpheniramine*, dimenhydrinate*, diphenhydramine*, disopyramide, dothiepin, doxepin, glycopyrrolate,                                                                                                                  |

|    |                                                |                                                                                                                                                                                                                                                                                                                                                                                                                                                                                                                                                                                                                                                                                                                                                                                                                                                                                                                                                                                                                                                          |
|----|------------------------------------------------|----------------------------------------------------------------------------------------------------------------------------------------------------------------------------------------------------------------------------------------------------------------------------------------------------------------------------------------------------------------------------------------------------------------------------------------------------------------------------------------------------------------------------------------------------------------------------------------------------------------------------------------------------------------------------------------------------------------------------------------------------------------------------------------------------------------------------------------------------------------------------------------------------------------------------------------------------------------------------------------------------------------------------------------------------------|
|    |                                                | homatropine, hyoscine* (butylbromide or hydrobromide), imipramine, ipratropium (nebulised), mianserin, nortriptyline, olanzapine, orphenadrine, oxybutynin, pericyazine, pheniramine*, pimozone, pizotifen, prochlorperazine, promethazine*, propantheline, solifenacin, tiotropium, tolterodine, trimeprazine*, trimipramine, triprolidine*, tropicamide (* available over-the-counter in Australia)[43]                                                                                                                                                                                                                                                                                                                                                                                                                                                                                                                                                                                                                                                |
| 31 | Medications that may cause dyspepsia           | Drugs with anticholinergic effects, aspirin, benzodiazepines, bisphosphonates, calcium channel antagonists, oral corticosteroids, dopaminergic drugs, doxycycline, erythromycin, ferrous sulphate, nitrates, NSAIDs, potassium chloride (slow release)[42,43,50,89]                                                                                                                                                                                                                                                                                                                                                                                                                                                                                                                                                                                                                                                                                                                                                                                      |
| 35 | Medications that may worsen asthma             | Aspirin, beta blockers (including eye drops), carbamazepine, echinacea, NSAIDs, royal jelly[43,90]                                                                                                                                                                                                                                                                                                                                                                                                                                                                                                                                                                                                                                                                                                                                                                                                                                                                                                                                                       |
| 38 | Non-specific URTI                              | Acute bronchitis, pharyngitis, tonsillitis, nonsuppurative otitis media and sinusitis[42]                                                                                                                                                                                                                                                                                                                                                                                                                                                                                                                                                                                                                                                                                                                                                                                                                                                                                                                                                                |
| 39 | Appropriate anti-osteoporotic medication       | Recommended daily intake (RDI) of calcium from dietary sources and/or supplements = 1300-1500 mg daily. RDI for Vitamin D from sunlight and/or dietary sources and/or supplements = 600 iu daily. Anti-osteoporotic medication = bisphosphonates, calcitriol, denosumab, HRT, raloxifene, strontium, teriparatide.[43] Evidence for fracture risk reduction in women $\geq 75$ years is either absent or lacking in NVF for alendronate, risedronate and teriparatide, and in HF for alendronate, risedronate, zoledronic acid and teriparatide. There is no data available for denosumab in VF, NVF or HF.[91] The optimal duration of bisphosphonate therapy is uncertain. Evidence supports the use of strontium for 5 years, raloxifene for 4 years, zoledronic acid and denosumab for 3 years. Exposure to teriparatide should be limited to 18 months.[92] Data are limited for non-ambulatory patients and those with significant comorbidities.[93] It should be noted that bone strength is only one of many determinants of fracture risk.[94] |
| 42 | Clinically significant medication interactions | Medication interactions that may interfere with the outcome of therapy                                                                                                                                                                                                                                                                                                                                                                                                                                                                                                                                                                                                                                                                                                                                                                                                                                                                                                                                                                                   |

A2A = angiotensin 2 receptor antagonist, ACE = angiotensin converting enzyme, ACEI = angiotensin converting enzyme inhibitor, AF = atrial fibrillation, CHADS<sub>2</sub> = Cardiac failure, Hypertension, Age, Diabetes, Stroke [doubled], CHA<sub>2</sub>DS<sub>2</sub>-VASc = Cardiac failure or dysfunction, Hypertension, Age over 75 years [doubled], Diabetes, Stroke [doubled], Vascular disease, Age 65-74 years, Sex category [female], CHD = coronary heart disease, CVD = cardiovascular disease, DBP = diastolic blood pressure, GFR = glomerular filtration rate, HF = hip fracture, HF-LVSD = Heart failure with left ventricular systolic dysfunction, HFPEF = heart failure with preserved ejection fraction, HRT = hormone replacement therapy, IHD = ischemic heart disease, ISH = isolated systolic hypertension, LVH = left ventricular hypertrophy, MAOI = monoamine oxidase inhibitor, MI = myocardial infarct, NSAID = non-steroidal anti-inflammatory drug, NVF = non-vertebral fracture, PAD = peripheral arterial disease, SBP = systolic blood pressure, SSRI = selective serotonin reuptake inhibitor, TC = total cholesterol, TCA = tricyclic antidepressant, TIA = transient ischemic attack, TNF = tumour necrosis factor, URTI = upper respiratory tract infection, VF = vertebral fracture

## DISCUSSION

This study identified a panel of medication management experts to discuss and validate a set of 41 prescribing appropriateness criteria for commonly used medicines and medical conditions in older ( $\geq 65$  years) Australians. Panel discussion resulted in retention of 39 of

1  
2  
3 the originally proposed 48 criteria, with 25 being reworded. These criteria do not simply  
4 represent a list of medications to avoid in the elderly, but also address issues such as the need  
5 for additional therapy (e.g. criteria 23 and 34, Table 3), additional tests (e.g. criteria 18-20,  
6 Table 3), ineffective treatment (e.g. criteria 22 and 37, Table 3) and medication monitoring  
7 (e.g. criteria 10 and 20, Table 3). They were designed to contribute to the Australian quality  
8 use of medicines (QUM) process.[95] The information required to apply these criteria may be  
9 obtained from a variety of sources such as the patient or their pharmacist, or patient medical  
10 notes. [30] It may also be provided by a Home Medicines Review referral form from the  
11 patients general practitioner.[28] Due to their currency and the nature of their development,  
12 we expect these criteria to make a significant contribution to the detection of DRPs in the  
13 Australian healthcare environment. For example, in a review of prescribing indicators for two  
14 conditions, [36] which are common in older people in Australia – type two diabetes and  
15 cardiovascular disease [96,97] – disease and drug-orientated criteria such as ours have shown  
16 good content, face, concurrent and predictive validity and operational feasibility, as well as  
17 use for internal and external quality assessment in both ambulatory and hospital care.[36]  
18 Evidence-practice gaps, which formed part of the developmental process for these criteria,  
19 have identified deficiencies in the treatment of these and other areas such as vaccination,  
20 asthma and pain.[6,98-101]

### 27 **Prescribing appropriateness tools in Australia**

28  
29  
30 Appropriateness of prescribing has been assessed by measures that are explicit or implicit, in  
31 an effort to identify and reduce DRPs.[102] In Australia, both types of measures have been  
32 used.[103-107] However, they have been imported into the Australian healthcare  
33 environment, with consequent shortcomings related to both the intrinsic nature of the  
34 measure, as well as environment compatibility issues. For example, in a study evaluating the  
35 impact of home medicine reviews on appropriateness of prescribing, a significant number of  
36 recommendations made regarding the need for monitoring and addition of missing therapy  
37 were found to have no impact on explicitly derived scores using the Medication  
38 Appropriateness Index,[103] due to the intrinsic shortcomings of this tool. This is not a tool  
39 that gives precise guidance in relation to specific medicines.[13]

40  
41  
42  
43  
44 The Beers criteria,[108] perhaps the tool most widely used to assess inappropriate prescribing  
45 in older people, has been used in Australia, but with modifications to exclude medicines not  
46 listed for government subsidy.[107] This is because medicine availability and use in Australia  
47 is largely determined by the Australian Pharmaceutical Benefits Scheme[41]. Other  
48 Australian studies have found that some medicines listed as inappropriate by Beers may be  
49 appropriate for certain older people according to Australian practice;[105] many medicines  
50 listed by Beers are not available in Australia; and that some medicines considered  
51 inappropriate in Australia are not listed by Beers.[106] Disagreement between Beers and other  
52 criteria, such as the improving prescribing in the elderly tool (IPET), have been  
53 identified.[109]



1  
2  
3 The Beers criteria was recently updated,[110] with approximately half the medicines listed  
4 being unavailable in Australia. Further, almost three quarters of the diseases or syndromes  
5 listed are not among the forty problems most frequently managed in patients over sixty five  
6 years of age by Australian general practitioners.[97] Beers still contains recommendations to  
7 avoid some medicines that are recommended for certain older people in Australia such as  
8 amiodarone, and it has recently been shown that rhythm control in older patients with atrial  
9 fibrillation may be more effective than rate control in reducing mortality over the long-  
10 term.[111]. Reviews of explicit and implicit criteria have identified these and other problems  
11 such as; failure to address drug-drug interactions and drug duplication, errors in  
12 recommendations, underrepresentation of certain drug categories, inclusion of infrequently  
13 prescribed drugs, criteria that are inapplicable for all situations, disagreement between  
14 criteria, and lack of organisation of criteria.[37 ,102 ,112]

15  
16  
17  
18  
19 This has resulted in the development by others of criteria more suited to their own particular  
20 healthcare environment.[113 ,114] Nationally based criteria have been described as the most  
21 desirable type of criteria, as they do not necessitate adaptation to local guidelines or national  
22 formularies before they can be used with confidence.[25 ,115] We therefore sought to  
23 construct and validate a set of prescribing appropriateness criteria relevant to the Australian  
24 healthcare environment. Our development process differed from most other tools[22 ,108  
25 ,113 ,114 ,116-119] as it did not initially involve a consensus panel, which has now been  
26 addressed. This development process also resulted in criteria unavailable in other tools such  
27 as monitoring, underprescribing, need for additional tests, evaluation of smoking and  
28 vaccination status, and certain drug interactions[25 ,37 ,102] Because we have generally  
29 named drug classes rather than specific drugs (Table 3), and targeted common medical  
30 conditions found in older patients,[120 ,121] we anticipate that our work may have some  
31 international usefulness.

32  
33  
34  
35  
36  
37  
38  
39  
40  
41  
42  
43  
44  
45  
46  
47  
48  
49  
50  
51  
52  
53  
54  
55  
56  
57  
58  
59  
60  
Despite a desire in Australia to develop decision support tools to improve healthcare  
quality,[122] progress has consisted of the development of a limited number of non-age  
specific structure and process indicator lists for use in hospitals and general practice.[44 ,123-  
125] Many of these lists require updating. [25 ,114 ,126] . Currently, there is no Australian  
prescribing appropriateness criteria list to assist in improving medication management in  
older people. The usefulness of such an approach has been acknowledged, together with other  
approaches such as medication review.[127]

### **Co-morbidity**

Over 80% of older Australians have three or more chronic conditions,[96] with Australian  
general practitioners shown to be dealing more frequently with patients presenting with three  
or four problems in the year 2009-10 compared with 2000-01.[128] Co-morbidity is  
associated with poor quality of life, physical disability, high health care use, multiple  
medicines with consequent increased risk of adverse drug events, fragmentation of care, and  
increased mortality.[121 ,129] Yet most Australian guidelines for chronic diseases do not  
modify or discuss the applicability of their recommendations to older patients with multiple  
comorbid conditions. [27] This situation is not restricted to Australia.[129 ,130] Because the



1  
2  
3 risk of harm in older patients increases in proportion to the number of treatments prescribed,  
4 prioritization of therapeutic goals is necessary. For example, coronary heart disease (CHD) is  
5 an important co-morbidity in Australia[78 ,96] for which treatment with ACE inhibitors or  
6 angiotensin 2 antagonists has been recommended to reduce the risk of cardiovascular  
7 events.[71 ,72] Other criteria derived outside Australia such as STOPP/START do not  
8 include this recommendation. [22] However, the presence of co-morbidity in CHD  
9 (commonly arthritis or respiratory disease) or other clinical factors (such as dizziness, falls or  
10 patient preference) may be more important in determining medication priorities with respect  
11 to commencing these medicines (Table 4).[73] Issues such as this may run counter to  
12 recommendations of disease-specific, evidence-based guidelines,[27] and were not contained  
13 in our original set of criteria. They have been added (where possible) to increase relevance.  
14 Addition of our criteria with this associated usage information (Table 4) to the implicit  
15 processes of Australian medication review may assist in addressing the problem of  
16 comorbidity.  
17  
18  
19  
20  
21

## 22 The Oldest Old

23  
24  
25 Knowledge about the state of health and function of the oldest old is limited,[131] with  
26 research on their drug use being scarce, and often based on small and selected samples  
27 without comparison with other age groups.[132 ,133] We know that older patients in general  
28 are underrepresented in clinical trials, so that disease-specific guideline recommendations  
29 based on evidence may not apply to older cohorts.[27] For example, undertreatment with  
30 anti-osteoporotic medicines has been identified as a significant evidence-practice gap in  
31 Australia.[98] While STOPP/START criteria recommend calcium and vitamin D  
32 supplements,[22] no recommendations for more specific medicines are made. Further,  
33 evidence available for fracture risk reduction has been reported to differ with age.[91](Table  
34 4). Similarly, blood pressure targets appropriate for older patients may not be appropriate for  
35 the oldest old,[51] with adverse effects for antihypertensives found to be among the most  
36 frequent in centenarians.[134] We have attempted to achieve the advantages of using mostly  
37 explicit criteria, such as ease of application, with the addition of application information  
38 (Tables 2 and 4) unavailable in our previous criteria set.  
39  
40  
41  
42

### 43 **Use of the RAND/UCLA appropriateness method**

44 We chose the RAND/UCLA appropriateness method, a two-round modified Delphi  
45 method[38] to select the most appropriate criteria. Unlike the Delphi method, which generally  
46 involves multiple questionnaire-driven rounds to obtain convergence of opinion, the RAND  
47 method involves an initial individual rating round, and a second face-to-face round. This  
48 method has been shown to produce results that have face, construct and predictive  
49 validity.[46 ,135] Systematically combining available evidence with expert opinion can  
50 create quality criteria where best evidence may be lacking.[47]  
51  
52  
53

54 While most lists of prescribing criteria are based on expert consensus, this has often been  
55 achieved through mail surveys rather than face-to-face meetings.[25 ,36 ,37] Although face-  
56 to-face meetings restrict panel size, they allow discussion to resolve misinterpretations,  
57 introduce new evidence, and improve clarity of criteria between rating rounds. We ensured  
58  
59  
60

1  
2  
3 our panel comprised different specialities, as less disagreement has been found among same-  
4 speciality panels.[45] We addressed concern regarding potential intimidation due to dominant  
5 panel personalities by choosing a moderator experienced in the development of these criteria  
6 and in facilitating small group discussion. Diversity of medication and disease management  
7 issues may have minimized professional, but not personal, conflict-of-interest issues. We  
8 used both the median panel rating and the amount of dispersion of panel ratings to identify  
9 agreement or disagreement. While it has been acknowledged that discrepancies between the  
10 two methods may occur,[38] discussion and second round rating resulted in agreement for all  
11 criteria for both methods.  
12  
13

### 14 15 16 **The nature of decision support tools**

17 Panel members emphasized that criteria may not provide definitive answers, instead  
18 indicating potential problems that might need addressing, due to a perceived unacceptable  
19 variation in care.[136] While performance indicators are designed to measure the result of  
20 statements made in clinical practice guidelines, these guidelines often provide  
21 recommendations for care independent of other considerations such as multiple co-  
22 morbidities, advanced age, frailty, patient preferences, disease burden or limited life  
23 expectancy.[137-139] In such cases, less stringent goals, deprescribing or non-prescription  
24 may be more appropriate.[15 ,82 ,140] For example, a frail older patient with multiple co-  
25 morbidities and one or more functional impairments may have a life expectancy of  
26 approximately two years or less.[76] This raises the question of whether failure to intensify  
27 treatment[82] or to underuse evidence-based therapies[141] reflects appropriate clinical  
28 judgement or an inappropriate care gap. The panel felt strongly that use of indicators,  
29 guidelines or criteria providing clinical decision support should never replace critical thinking  
30 in patient care.[142]  
31  
32  
33  
34  
35  
36  
37

### 38 **Strengths and weaknesses**

39 We have followed a recommended approach [122] by suggesting criteria for which high  
40 quality evidence exists linking best practice with improved outcomes; where there are  
41 established evidence-practice gaps[98 ,99]; and where the health conditions impose the  
42 greatest burden on the healthcare system. We used a validated consensus method, an expert  
43 panel of varied specialization, and criteria written with the aim of conciseness and clarity.  
44  
45

46 In addition to face and content validity, these validated criteria, much like performance  
47 indicators, will require further developmental work to provide evidence of their acceptability,  
48 operational feasibility, reliability, and degree of predictive validity.[36 ,136] Some of this  
49 work has already commenced with the original criteria.[30] Further, these criteria only cover  
50 commonly occurring medicines and medical conditions. In addition, judgements made by an  
51 expert panel may not be representative of all health care professionals.  
52  
53  
54

### 55 **Intended use**

56 These validated criteria are intended for use by health care providers to enhance the quality of  
57 the Australian medication review process, for quality improvement, educational purposes and  
58  
59  
60

1  
2  
3 internal audit. They are also intended for external quality assessment, such as use by policy  
4 makers and for public reporting. Stakeholder involvement will be critical to facilitate local  
5 uptake and encourage further research into the effects on health outcomes.[127]  
6  
7

## 8 CONCLUSION

9  
10 This study validated 41 prescribing appropriateness criteria to assist in identifying DRPs in  
11 older ( $\geq 65$  years) Australians. These criteria are intended to represent an addition to the  
12 medication management skill set that includes consideration of limited life expectancy,  
13 evidence base in the oldest old, drug burden and care coordination, patient and care-giver  
14 education, empowerment for self management, and shared decision making. These skills are  
15 far from a “do everything for everyone” philosophy, where aggressive treatment may  
16 encourage more care, not more appropriate care.[24 ,138] Despite the presence of clinical  
17 decision support tools, health care providers need to know how to think about clinical  
18 problems, not just what to think.[142]  
19  
20  
21  
22

23 **Competing interests** None declared  
24

25  
26 **Contributors** BJB designed and organised the study, analysed and interpreted the data and  
27 drafted the manuscript. TFC and RJM made substantial contributions to the conception,  
28 design, analysis and interpretation of the data, and to critically revising the draft. All authors  
29 take responsibility for the accuracy and integrity of the study. All authors have given final  
30 approval of the version to be published.  
31  
32

33  
34 **Funding** This research received no specific grant from any funding agency in the public,  
35 commercial or not-for-profit sectors  
36

37 **Data sharing statement** No additional data are available  
38  
39

## 40 REFERENCES

- 41  
42  
43  
44 1 Kwint H-F, Faber A, Gussekloo J, *et al.* Effects of Medication Review on Drug-  
45 Related Problems in Patients Using Automated Drug-Dispensing Systems. *Drugs*  
46 & *Aging* 2011;28(4):305-14.  
47 2 Ellitt GR, Engblom E, Aslani P, *et al.* Drug related problems after discharge  
48 from an Australian teaching hospital. *Pharm World Sci* 2010;32(5):622-30.  
49 3 Nishtala PS, McLachlan AJ, Bell JS, *et al.* A retrospective study of drug-related  
50 problems in Australian aged care homes: medication reviews involving  
51 pharmacists and general practitioners *Journal of Evaluation in Clinical Practice*  
52 2011;17(1):97-103.  
53 4 Stafford AC, Tenni PC, Peterson GM, *et al.* Drug-related problems identified in  
54 medication reviews by Australian pharmacists. *Pharm World Sci* 2009;31:216-23.  
55  
56  
57  
58  
59  
60

- 1  
2  
3  
4  
5  
6  
7  
8  
9  
10  
11  
12  
13  
14  
15  
16  
17  
18  
19  
20  
21  
22  
23  
24  
25  
26  
27  
28  
29  
30  
31  
32  
33  
34  
35  
36  
37  
38  
39  
40  
41  
42  
43  
44  
45  
46  
47  
48  
49  
50  
51  
52  
53  
54  
55  
56  
57  
58  
59  
60
- 5 Castelino RL, Chen TF, Guddattu V, *et al.* Use of evidence-based therapy for the prevention of cardiovascular events among older people *Eval Health Prof* 2010;33(3):276-301.
- 6 Heeley EL, Peiris DP, Patel AA, *et al.* Cardiovascular risk perception and evidence-practice gaps in Australian general practice (the AusHEART study). *MJA* 2010;192(5):254-59.
- 7 National Institute of Clinical Studies, Australian Government. Evidence-practice gaps report, vol. 1. A review of developments 2004-2007. 2008. <http://www.nhmrc.gov.au/nics/materials-and-resources/evidence-practice-gaps-report-volume-one-review-developments-2004-2007> (accessed 18 July 2012)
- 8 Hilmer SN, Gnjjidic D. The effects of polypharmacy in older adults. *Clin Pharmacol Ther* 2009;85:86-88.
- 9 Pirmohamed M, James S, Meakin S, *et al.* Adverse drug reactions as cause of admission to hospital: prospective analysis of 18 820 patients. *BMJ* 2004;329(7456):15-19.
- 10 Kongkaew C, Noyce PR, Ashcroft DM. Hospital admissions associated with adverse drug reactions: A systematic review of prospective observational studies. *Ann Pharmacother* 2008;42:1017-25.
- 11 Gilbert AL, Roughead EE, Beilby J, *et al.* Collaborative medication management services: improving patient care. *MJA* 2002;177:189-92.
- 12 Elliott RA, Martinac G, Campbell S, *et al.* Pharmacist-led medication review to identify medication-related problems in older people referred to an aged care assessment team. A randomized comparative study. *Drugs & Aging* 2012;29(7):593-605.
- 13 Kaur S, Mitchell G, Vitetta L, *et al.* Interventions that can reduce inappropriate prescribing in the elderly. *Drugs Aging* 2009;26(12):1013-28.
- 14 Tulner LR, van Campen JPCM, Frankfort SV, *et al.* Changes in under-treatment after comprehensive geriatric assessment. An observational study. *Drugs & Aging* 2010;27(10):831-43.
- 15 Le Couteur DG, Banks E, Gnjjidic D, *et al.* Deprescribing. *Aust Presc* 2011;34:182-5.
- 16 Garfinkel D, Mangin D. Feasibility study of a systemic approach for discontinuation of multiple medications in older adults. *Arch Intern Med* 2010;170(18):1648-54.
- 17 Gill JM, Mainous AG, Koopman RJ, *et al.* Impact of EHR-based clinical decision support on adherence to guidelines for patients on NSAID's: a randomised controlled trial. *Ann Fam Med* 2011;9:22-30.
- 18 O'Connor PJ, Sperl-Hillen JM, Rush WA, *et al.* Impact of electronic health record clinical decision support on diabetes care; a randomised trial. *Ann Fam Med* 2011;9:12-21.
- 19 Chang C-B, Chan D-C. Comparison of published explicit criteria for potentially inappropriate medications in older adults. *Drugs & Aging* 2010;27(12):947-57.
- 20 Scott I, Jayathissa S. Quality of drug prescribing in older patients: is there a problem and can we improve it? *Intern Med J* 2010;40:7-18.
- 21 The American Geriatrics Society 2012 Beers criteria update expert panel. American Geriatrics Society updated Beers criteria for potentially inappropriate medication use in older adults. *J Am Geriatr Soc* 2012;60:616-31.
- 22 Gallagher P, Ryan C, Byrne S, *et al.* STOPP (screening tool of older person's prescriptions) and START (screening tool to alert doctors to right treatment).

- 1  
2  
3  
4  
5  
6  
7  
8  
9  
10  
11  
12  
13  
14  
15  
16  
17  
18  
19  
20  
21  
22  
23  
24  
25  
26  
27  
28  
29  
30  
31  
32  
33  
34  
35  
36  
37  
38  
39  
40  
41  
42  
43  
44  
45  
46  
47  
48  
49  
50  
51  
52  
53  
54  
55  
56  
57  
58  
59  
60
- Consensus validation. *International Journal of Clinical Pharmacology and Therapeutics* 2008;46(2):72-83.
- 23 Fried TR, Tinetti ME, Iannone MA. Primary care clinicians experiences with treatment decision making for older persons with multiple conditions. *Arch Intern Med* 2011;171(1):75-80.
- 24 Hayward RA. Performance measurement in search of a path. *N Eng J Med* 2007;356(9):951-52.
- 25 Dimitrow MS, Airaksinen MSA, Kivela S-L, *et al.* Comparison of prescribing criteria to evaluate the appropriateness of drug treatment in individuals aged 65 and older: A systematic review. *J Am Geriatr Soc* 2011;59(8):1521-30.
- 26 Mangin D, Sweeney K, Heath I. Preventative health care in elderly people needs rethinking. *BMJ* 2007;335:285-87.
- 27 Scott IA, Guyatt GH. Cautionary tales in the interpretation of clinical studies involving older persons. *Arch Intern Med* 2010;170(7):587-95.
- 28 Medicare Australia [homepage on the internet]. Australian Government. Home Medicines Review. <http://www.medicareaustralia.gov.au/provider/pbs/fourth-agreement/hmr.jsp>. (accessed 17 July 2012).
- 29 Basger BJ, Chen TF, Moles RJ. Inappropriate Medication Use and Prescribing Indicators in Elderly Australians. *Drugs Aging* 2008;25(9):777-93.
- 30 Basger BJ, Chen TF, Moles RJ. Application of a prescribing indicators tool to assist in identifying drug-related problems in a cohort of older Australians. *Int J Pharm Pract* 2012;20(3):172-82.
- 31 Laroche ML, Charmes JP, Bouthier JP, *et al.* Inappropriate medications in the elderly. *Clin Pharmacol Ther* 2009;85(1):94-7.
- 32 Maio V, Jutkowitz E, Herrera K, *et al.* Appropriate medication prescribing in elderly patients: how knowledgeable are primary care physicians? A survey study in Parma, Italy. *J Clin Pharm Ther* 2011;36:468-80.
- 33 Resnick B, Pacala JT. 2012 Beers criteria. *J Am Geriatr Soc* 2012;60:612-13.
- 34 Chang C-B, Chen J-H, Wen C-J, *et al.* Potentially inappropriate medications in geriatric outpatients with polypharmacy: application of six sets of published explicit criteria. *Br J Clin Pharmacol* 2011;72(3):482-89.
- 35 Runciman WB, Hunt TD, Hannaford NA, *et al.* CareTrack: assessing the appropriateness of health care delivery in Australia. *MJA* 2012;197(2):100-05.
- 36 Martirosyan L, Voorham J, Haaiker-Ruskamp FM, *et al.* A systematic literature review : prescribing indicators related to type 2 diabetes mellitus and cardiovascular risk management. *Pharmacoepidemiol Drug Saf* 2010;19:319-34.
- 37 Levy HB, Marcus E-L, Christen C. Beyond the Beers criteria: a comparative overview of explicit criteria *Ann Pharmacother* 2010;44:1968-75.
- 38 Fitch K, Bernstein SJ, Aguilar MS, *et al.* The RAND/UCLA Appropriateness Method User's Manual 2001. Rand Corporation. [www.rand.org/pubs/monograph\\_reports/MR1269.html](http://www.rand.org/pubs/monograph_reports/MR1269.html) (accessed 18 July 2012)
- 39 Martirosyan L, Braspenning J, Denig P, *et al.* Prescribing quality indicators of type 2 diabetes mellitus ambulatory care. *Qual Saf Health Care* 2008;17:318-23.
- 40 Bettering the evaluation and care of health (BEACH). Family Medicine Research Centre. The University of Sydney. <http://sydney.edu.au/medicine/fmrc/beach/> (accessed 18 July 2012)
- 41 Access to Pharmaceutical Services. *Pharmaceutical Benefits Scheme. Department of Health and Ageing. Australian Government.* <http://www.health.gov.au/internet/budget/publishing.nsf/Content/2010->



- 1  
2  
3  
4  
5  
6  
7  
8  
9  
10  
11  
12  
13  
14  
15  
16  
17  
18  
19  
20  
21  
22  
23  
24  
25  
26  
27  
28  
29  
30  
31  
32  
33  
34  
35  
36  
37  
38  
39  
40  
41  
42  
43  
44  
45  
46  
47  
48  
49  
50  
51  
52  
53  
54  
55  
56  
57  
58  
59  
60
- [11 Health PBS sup1/\\$File/Outcome%20%20-%20Access%20to%20Pharmaceutical%20Services.pdf](#). (accessed 10 July 2012).  
eTG complete [CD-ROM]. Melbourne (VIC): Therapeutic Guidelines, 2011 Nov  
Rossi S (Editor), Australian Medicines Handbook 2012 (CD-ROM). Adelaide:  
Australian Medicines Handbook Pty Ltd; 2012  
NSW Therapeutic Advisory Group. Indicators for Quality Use of Medicines in  
Australian Hospitals 2007  
<http://www.ciap.health.nsw.gov.au/nswtag/documents/publications/QUMIndicators/Manual0408.pdf> (accessed 18 July 2012).  
Shekelle PG. Appropriateness criteria: a useful tool for the cardiologist. *Heart*  
2009;95(7):517-20.  
SooHoo NF, Lieberman JR, Farnig E, *et al*. Development of quality of care  
indicators for patients undergoing total hip or total knee replacement. *Qual Saf*  
2011;20:153-57.  
Avery AJ, Dex GM, Mulvaney C, *et al*. Development of prescribing-safety  
indicators for GPs using the RAND appropriateness method. *Brit J Gen Pract*  
2011;61:526-36.  
Hypertension and target blood pressure. National Prescribing Service.  
Indicators of quality prescribing in Australian general practice. A Manual for  
Users [online]. Available from URL:  
[http://www.nps.org.au/data/assets/pdf\\_file/0019/37351/indicators\\_full.pdf](http://www.nps.org.au/data/assets/pdf_file/0019/37351/indicators_full.pdf)  
(accessed 18 July 2012)  
Heart Foundation Guide to management of hypertension 2008. Updated  
December 2010.  
<http://www.heartfoundation.org.au/SiteCollectionDocuments/HypertensionGuidelines2008to2010Update.pdf> (accessed 18 July 2012).  
*Australian Medicines Handbook Drug Choice Companion: Aged Care. 3rd edn.*  
Adelaide: Australian Medicines Handbook Pty Ltd; 2010.  
Charpentier MM, Bundeiff MM. Treating hypertension in the very elderly. *Ann*  
*Pharmacother* 2011;45:1138-45.  
Gribbin J, Hubbard R, Gladman JRF, *et al*. Risk of falls associated with  
antihypertensive medication; population-based case control study. *Age Ageing*  
2010;39:592-97.  
Tinetti ME, Kumar C. The patient who falls. *JAMA* 2010;303(3):258-66.  
Therapeutics Initiative. Do statins have a role in primary prevention? An  
update. Therapeutics letter. March-April 2010; 77: 1-5.  
<http://www.ti.ubc.ca/sites/ti.ubc.ca/files/77.pdf> (accessed 18 July 2012).  
Ray KK, Seshasai SRK, Erqou S, *et al*. Statins and all-cause mortality in high-  
risk primary prevention. A meta-analysis of 11 randomised controlled trials  
involving 65,229 participants. *Arch Intern Med* 2010;170(12):1024-31.  
deLorgeril M, Salen P, Abramson J, *et al*. Cholesterol lowering, cardiovascular  
diseases, and the rosuvastatin-JUPITER controversy. A critical reappraisal.  
*Arch Intern Med* 2010;170(12):1032-36.  
Petersen LK, Christensen K, Kragstrup J. Lipid-lowering treatment to the end?  
A review of observational studies and RCTs on cholesterol and mortality in 80+  
year olds. *Age Ageing* 2010;39:674-80.  
Robinson JG. Lipid-lowering therapy for the primary prevention of  
cardiovascular disease in the elderly. Opportunities and challenges. *Drugs Aging*  
2009;26(11):917-31.



- 1  
2  
3 59 Krum H, Jelinek M, Stewart S, *et al.* 2011 Update to National Heart Foundation  
4 of Australia and Cardiac Society of Australia and New Zealand guidelines for  
5 the prevention, detection and management of chronic heart failure in Australia,  
6 2006 *MJA* 2011;194(8):405-09.
- 7 60 Krum H, Teerlink JR. Medical therapy for chronic heart failure. *Lancet*  
8 2011;378:713-21.
- 9 61 Huang D, Cheng JWM. Pharmacologic management of heart failure with  
10 preserved ejection fraction. *Ann Pharmacother* 2010;44:1933-45.
- 11 62 Management of diastolic heart failure [revised 2008 June]. In: eTG complete  
12 [CD-ROM]. Melbourne: Therapeutic Guidelines Limited; 2011 Nov.
- 13 63 Huang N, Duggan K, Harman J. Lifestyle management of hypertension. *Aust*  
14 *Presc* 2008;31:150-53.
- 15 64 Stokes GS. Management of hypertension in the elderly patient. *Clinical*  
16 *Interventions in Aging* 2009;4:379-89.
- 17 65 Bajorek BV, Krass I, Ogle SJ, *et al.* Optimizing the use of antithrombotic  
18 therapy for atrial fibrillation in older people: A pharmacist-led multidisciplinary  
19 intervention. *J Am Geriatr Soc* 2005;53:1912-20.
- 20 66 De Caterina R, Hylek EM. Stroke prevention in atrial fibrillation: current status  
21 and near-future directions. *Am J Med* 2011;124:793-99.
- 22 67 Gillett RG, Norrell A. Considerations for safe use of statins: liver enzyme  
23 abnormalities and muscle toxicity. *Am Fam Physician* 2011;83(6):711-16.
- 24 68 Thomas JE, Tershakovec AM, Jones-Burton C, *et al.* Lipid lowering for  
25 secondary prevention of cardiovascular disease in older adults. *Drugs Aging*  
26 2010;27(12):959-72.
- 27 69 Perrotta C, Aznar M, Mejia R, *et al.* Oestrogens for preventing recurrent  
28 urinary tract infection in postmenopausal women. *Cochrane Database of*  
29 *Systematic Reviews* 2008, Issue 2. Art. No.: CD005131. DOI:  
30 10.1002/14651858.CD005131.pub2. 2008.
- 31 70 Treatment of hypothyroidism [revised 2009 June]. In: eTG complete [CD-  
32 ROM]. Melbourne: Therapeutic Guidelines Limited; 2011 July.
- 33  
34  
35  
36  
37  
38  
39 71 Reducing Risk in Heart Disease 2007. A summary guide for preventing  
40 cardiovascular events in people with coronary heart disease. Updated 2008.  
41 National Heart Foundation of Australia and the Cardiac Society of Australia and  
42 New Zealand. [http://www.heartfoundation.org.au/information-for-](http://www.heartfoundation.org.au/information-for-professionals/Clinical-Information/Pages/coronary-heart-disease.aspx)  
43 [professionals/Clinical-Information/Pages/coronary-heart-disease.aspx](http://www.heartfoundation.org.au/information-for-professionals/Clinical-Information/Pages/coronary-heart-disease.aspx) (accessed  
44 12 July 2012).
- 45 72 Volpe M. Should all patients at high cardiovascular risk receive renin-  
46 angiotensin system blockers? *Q J Med* 2012;105:11-27.
- 47 73 Boyd CM, Leff B, Wolff JL, *et al.* Informing clinical practice guideline  
48 development and implementation: prevalence of coexisting conditions among  
49 adults with coronary heart disease. *J Am Geriatr Soc* 2011;59:797-805.
- 50 74 Heart Foundation. Guide to management of Hypertension 2008 updated 2010  
51 [online].  
52 [http://www.heartfoundation.org.au/SiteCollectionDocuments/HypertensionGuid-](http://www.heartfoundation.org.au/SiteCollectionDocuments/HypertensionGuidelines2008to2010Update.pdf)  
53 [elines2008to2010Update.pdf](http://www.heartfoundation.org.au/SiteCollectionDocuments/HypertensionGuidelines2008to2010Update.pdf) [accessed 18 July 2012].
- 54 75 Guidelines for the assessment of absolute cardiovascular disease risk.  
55 [http://www.heartfoundation.org.au/SiteCollectionDocuments/guidelines-](http://www.heartfoundation.org.au/SiteCollectionDocuments/guidelines-Absolute-risk.pdf)  
56 [Absolute-risk.pdf](http://www.heartfoundation.org.au/SiteCollectionDocuments/guidelines-Absolute-risk.pdf) (accessed 18 July 2012).
- 57  
58  
59  
60

- 1  
2  
3 76 Holmes HM. Rational prescribing for patients with a reduced life expectancy. *Clin Pharmacol Ther* 2009;85(1):103-7.
- 4  
5 77 Improving treatment of systolic heart failure. NPS News 75, 2011. National  
6 Prescribing Service Limited.  
7 [http://www.nps.org.au/ data/assets/pdf file/0006/132495/News75\\_heart\\_failure](http://www.nps.org.au/data/assets/pdf_file/0006/132495/News75_heart_failure_1011v2.pdf)  
8 [1011v2.pdf](http://www.nps.org.au/data/assets/pdf_file/0006/132495/News75_heart_failure_1011v2.pdf) (accessed 18 July 2012).
- 9  
10 78 Caughey GE, Roughead EE, Shakib S, *et al.* Co-morbidity and potential  
11 treatment conflicts in elderly heart failure patients. *Drugs Aging* 2011;28(7):575-  
12 81.
- 13 79 Lip GYH, Halperin JL. Improving stroke risk stratification in atrial fibrillation.  
14 *Am J Med* 2010;123:484-88.
- 15 80 Hughes M, Lip GYH. Risk factors for anticoagulation-related bleeding  
16 complications in patients with atrial fibrillation: a systematic review. *Q J Med*  
17 2007;100:599-607.
- 18  
19 81 Statins and muscle disorders - be careful with the dose. Australian Adverse  
20 Drug Reactions Bulletin 2008; 27 (3). <http://www.tga.gov.au/pdf/aadrb-0806.pdf>  
21 (accessed 18 July 2012)
- 22 82 LeChauncy WD, Landrum CR, Urech TH, *et al.* Treating chronically ill people  
23 with diabetes mellitus with limited life expectancy: Implications for performance  
24 measurement. *J Am Geriatr Soc* 2012;DOI: 10.1111/j.1532-5415.2011.03784.x:1-  
25 9.
- 26 83 Lee SJ, Boscardin WJ, Cenzer IS, *et al.* The risks and benefits of implementing  
27 glycemic control guidelines in frail older adults with diabetes mellitus. *J Am*  
28 *Geriatr Soc* 2011;59:666-72.
- 29 84 Joint Formulary Committee. British National Formulary (online) London: BMJ  
30 Group and Pharmaceutical Press <<http://www.medicinescomplete.com>>  
31 [Accessed on 18 July 2012].
- 32  
33 85 Analgesic choices in persistent pain. Prescribing Practice Review 2006; 35.  
34 National Prescribing Service Limited  
35 [http://www.nps.org.au/ data/assets/pdf file/0017/23750/ppr35 analgesics 0906.](http://www.nps.org.au/data/assets/pdf_file/0017/23750/ppr35_analgesics_0906.pdf)  
36 [pdf](http://www.nps.org.au/data/assets/pdf_file/0017/23750/ppr35_analgesics_0906.pdf) (accessed 18 July 2012).
- 37 86 Hill KD, Wee R. Psychotropic drug-induced falls in older people. A review of  
38 interventions aimed at reducing the problem. *Drugs Aging* 2012;29(1):15-30.
- 39 87 Zeimer H. Medications and falls in older people. *Journal of Pharmacy Practice*  
40 *and Research* 2008;38(2):148-51.
- 41 88 Caughey GE, Roughead EE, Shakib S, *et al.* Comorbidity of chronic disease and  
42 potential treatment conflicts in older people dispensed antidepressants. *Age*  
43 *Ageing* 2010;39:488-94.
- 44 89 Proton pump inhibitors. NPS News 46, 2006. National Prescribing Service  
45 Limited.  
46 [http://www.nps.org.au/ data/assets/pdf file/0016/23821/news46\\_gord ppis 060](http://www.nps.org.au/data/assets/pdf_file/0016/23821/news46_gord_ppis_0606.pdf)  
47 [6.pdf](http://www.nps.org.au/data/assets/pdf_file/0016/23821/news46_gord_ppis_0606.pdf) (accessed 18 July 2012).
- 48  
49 90 National Asthma Council Australia. Asthma Management Handbook 2006.  
50 National Asthma Council Australia, Melbourne, 2006  
51 [http://www.nationalasthma.org.au/uploads/handbook/370-amh2006\\_web\\_5.pdf](http://www.nationalasthma.org.au/uploads/handbook/370-amh2006_web_5.pdf)  
52 (accessed 18 July 2012).
- 53  
54 91 Inderjeeth CA, Poland KE. Management of osteoporosis in older people. *J*  
55 *Pharm Pract Res* 2010;40:229-34.
- 56 92 Reducing fracture risk in osteoporosis. NPS News 73, 2011. National Prescribing  
57 Service Limited.  
58  
59  
60

- 1  
2  
3 [http://www.nps.org.au/data/assets/pdf\\_file/0014/126401/News73\\_osteoporosis\\_0511.pdf](http://www.nps.org.au/data/assets/pdf_file/0014/126401/News73_osteoporosis_0511.pdf) (accessed 18 July 2012).
- 4  
5 93 Gates BJ, Sonnett TE, DuVall CAK, *et al.* Review of osteoporosis  
6 pharmacotherapy for geriatric patients. *Am J Geriatr Pharmacother* 2009;7:293-  
7 323.
- 8  
9 94 Cheung AM, Detsky AS. Osteoporosis and fractures - Missing the bridge?  
10 *JAMA* 2008;299(12):1468-70.
- 11 95 Commonwealth of Australia. The National Strategy for Quality Use of  
12 Medicines Plain English Edition [online]. Available from URL:  
13 [http://www.health.gov.au/internet/main/Publishing.nsf/Content/CA777524C860](http://www.health.gov.au/internet/main/Publishing.nsf/Content/CA777524C860DFE2CA256F1800468B61/$File/natstrateng.pdf)  
14 [DFE2CA256F1800468B61/\\$File/natstrateng.pdf](http://www.health.gov.au/internet/main/Publishing.nsf/Content/CA777524C860DFE2CA256F1800468B61/$File/natstrateng.pdf) [accessed 18 July 2012]
- 15 96 Caughey GE, Vitry AI, Gilbert AL, *et al.* Prevalence of comorbidity of chronic  
16 diseases in Australia. *BMC Public Health* 2008.  
17 <http://www.biomedcentral.com/1471-2458/8/221>. (accessed 18 July 2012).
- 18 97 Top 40 most frequently managed problems: Patients aged 65+. Personal  
19 communication, unpublished data from the BEACH Program, Family Medicine  
20 Research Centre, University of Sydney, November 2011.  
21 <http://sydney.edu.au/medicine/fmrc/beach/index.php> (accessed 10 July 2012).
- 22 98 Evidence-practice gaps report. vol. 2. National Institute of Clinical Studies.  
23 Australian Government 2005.  
24 [http://www.nhmrc.gov.au/nics/material\\_resources/resources/evidence\\_volume\\_2](http://www.nhmrc.gov.au/nics/material_resources/resources/evidence_volume_2)  
25 [wo.htm](http://www.nhmrc.gov.au/nics/material_resources/resources/evidence_volume_2). (accessed 12 July 2012)
- 26 99 Evidence-practice gaps report. Vol. 1. National Institute of Clinical Studies,  
27 Australian Government 2003.  
28 [http://www.nhmrc.gov.au/nics/material\\_resources/resources/evidence\\_volume\\_1](http://www.nhmrc.gov.au/nics/material_resources/resources/evidence_volume_1)  
29 [ne.htm](http://www.nhmrc.gov.au/nics/material_resources/resources/evidence_volume_1). (accessed 17 July 2012).
- 30 100 Evidence-Practice Gaps Report Volume 1. A review of developments: 2004-  
31 2007. National Institute of Clinical Studies. Australian Government.  
32 [http://www.nhmrc.gov.au/nics/materials-and-resources/evidence-practice-gaps-](http://www.nhmrc.gov.au/nics/materials-and-resources/evidence-practice-gaps-report-volume-one-review-developments-2004-2007)  
33 [report-volume-one-review-developments-2004-2007](http://www.nhmrc.gov.au/nics/materials-and-resources/evidence-practice-gaps-report-volume-one-review-developments-2004-2007) (accessed 17 July 2012).
- 34 101 Bajorek BV, Ren S. Utilisation of antithrombotic therapy for stroke prevention  
35 in atrial fibrillation in a Sydney hospital: then and now. *Int J Clin Pharm*  
36 2012;34:88-97.
- 37 102 O'Connor MN, Gallagher P, O'Mahony D. Inappropriate prescribing. Criteria,  
38 detection and prevention. *Drugs Aging* 2012;29(6):437-52.
- 39 103 Castelino RL, Bajorek BV, Chen TF. Retrospective evaluation of home medicine  
40 review by pharmacists in older Australian Patients using the Medication  
41 Appropriateness Index. *Ann Pharmacother* 2010;44:1922-29.
- 42 104 King MA, Roberts MS. The influence of the Pharmaceutical Benefits Scheme  
43 (PBS) on inappropriate prescribing in Australian nursing homes. *Pharmacy*  
44 *World & Science* 2007;29:39-42.
- 45 105 Stafford AC, Alswayan MS, Tenni PC. Inappropriate prescribing in older  
46 residents of Australian care homes. *J Clin Pharm Ther* 2011;36:33-44.
- 47 106 Widagdo IS, Nyfort-Hansen K, Kowalski SR. Prevalence of potentially  
48 inappropriate medication use in elderly hospitalised patients. *J Pharm Pract Res*  
49 2011;41:122-25.
- 50 107 Roughead EE, Anderson B, Gilbert AL. Potentially inappropriate prescribing  
51 among Australian veterans and war widows/widowers. *Internal Medicine Journal*  
52 2007;37:402-05.
- 53  
54  
55  
56  
57  
58  
59  
60

- 1  
2  
3 108 Fick DM, Cooper JW, Wade WE, *et al.* Updating the Beers criteria for  
4 potentially inappropriate medication use in older adults: results of a US  
5 consensus panel of experts. *Archives of Internal Medicine* 2003;163(22):2716-24.  
6 109 Ryan C, O'Mahony D, Kennedy J, *et al.* Appropriate prescribing in the elderly:  
7 an investigation of two screening tools, Beers criteria considering diagnosis and  
8 independent of diagnosis and improving prescribing in the elderly tool to identify  
9 inappropriate use of medicines in the elderly in primary care in Ireland. *J Clin  
10 Pharm Ther* 2009;34:369-76.  
11 110 American Geriatrics Society updated Beers criteria for potentially  
12 inappropriate medication use in older adults. The American Geriatrics Society  
13 2012 Beers Criteria update expert panel. *J Am Geriatr Soc* 2012;60:616-31.  
14 111 Ionescu-Ittu R, Abrahamowicz M, Jackevicius CA, *et al.* Comparative  
15 effectiveness of rhythm control vs rate control drug treatment effect on mortality  
16 in patients with atrial fibrillation. *Arch Intern Med* 2012;172(13):997-1004.  
17 112 Page RL, Linnebur SA, Bryant LL, *et al.* Inappropriate prescribing in the  
18 hospitalised elderly patient: Defining the problem, evaluation tools, and possible  
19 solutions. *Clin Interv Aging* 2010;5:75-87.  
20 113 Holt S, Schmiedl S, Thurmann PA. Potentially inappropriate medications in the  
21 elderly: The PRISCUS list. *Deutsches Arzteblatt International* 2010;107(31-  
22 32):543-51.  
23 114 Laroche ML, Charmes JP, Merle L. Potentially inappropriate medications in  
24 the elderly: a French consensus panel list. *European Journal of Clinical  
25 Pharmacology* 2007;63:725-31.  
26 115 Castelino RL, Bajorek BV, Chen TF. Targeting suboptimal prescribing in the  
27 elderly: a review of the impact of pharmacy services. *Ann Pharmacother*  
28 2009;43:1096-106.  
29 116 Beers MH. Explicit criteria for determining potentially inappropriate  
30 medication use by the elderly. An update. *Archives of Internal Medicine*  
31 1997;157(14):1531-6.  
32 117 Beers MH, Ouslander JG, Rollinger I, *et al.* Explicit criteria for determining  
33 inappropriate medication use in nursing home residents. UCLA Division of  
34 Geriatric Medicine. *Archives of Internal Medicine* 1991;151(9):1825-32.  
35 118 McLeod PJ, Huang AR, Tamblyn RM, *et al.* Defining inappropriate practices in  
36 prescribing for elderly people: a national consensus panel. *CMAJ*  
37 1997;156(3):385-91.  
38 119 Zhan C, Sangl J, Bierman AS, *et al.* Potentially inappropriate medication use in  
39 the community-dwelling elderly: findings from the 1996 Medical Expenditure  
40 Panel Survey. *JAMA* 2001;286(22):2823-9.  
41 120 Starfield B, Lemke KW, Herbert R, *et al.* Comorbidity and the use of primar  
42 care and specialist care in the elderly. *Ann Fam Med* 2005;3:215-22.  
43 121 Barnett K, Mercer SW, Norbury M, *et al.* Epidemiology of multimorbidity and  
44 implications for health care, research, and medical education: a cross-sectional  
45 study. *Lancet* 2012;380:37-43.  
46 122 Evans SM, Lowinger JS, Sprivulis PC, *et al.* Prioritizing quality indicator  
47 development across the healthcare system: identifying what to measure. *Intern  
48 Med J* 2009;39:648-54.  
49 123 Elliott RA, Woodward MC, Osborne CA. Indicators of prescribing quality for  
50 elderly hospital inpatients. *Aust J Hosp Pharm* 2001;31:19-25.  
51 124 National Prescribing Service. Indicators of quality prescribing in Australian  
52 general practice 2006. A Manual for Users.  
53  
54  
55  
56  
57  
58  
59  
60



- 1  
2  
3 [http://www.nps.org.au/data/assets/pdf\\_file/0019/37351/indicators\\_full.pdf](http://www.nps.org.au/data/assets/pdf_file/0019/37351/indicators_full.pdf)  
4 (accessed 14 Feb 2012).
- 5 125 A proposed set of clinical indicators for stakeholder comment by 30 July 2012.  
6 RACGP clinical improvement unit practice, policy and innovation department.  
7 The Royal Australian College of General Practitioners.  
8 [http://www.racgp.org.au/Content/NavigationMenu/ClinicalResources/Clinicalindicators/2012ClinicalIndicators\\_ConsultationPaper.pdf](http://www.racgp.org.au/Content/NavigationMenu/ClinicalResources/Clinicalindicators/2012ClinicalIndicators_ConsultationPaper.pdf) (accessed 16 July 2012).  
9
- 10 126 Morris CJ, Cantrill JA, Hepler CD, *et al.* Preventing drug-related morbidity--  
11 determining valid indicators. *International Journal for Quality in Health Care*  
12 2002;14(3):183-98.
- 13 127 Bell JS, Le Couteur DG, McLachlan AJ, *et al.* Improving medicine selection for  
14 older people. Do we need an Australian classification for inappropriate  
15 medicines use? *Aust Fam Physician* 2012;41:9-10.
- 16 128 Britt H, Miller GC, Charles J, *et al.* General practice activity in Australia 2000-1  
17 to 2009-10: 10 year data tables. General practice series no. 28. Cat. no. GEP 28.  
18 Canberra: AIHW. [http://www.aihw.gov.au/publication-  
19 detail/?id=6442472440&tab=2](http://www.aihw.gov.au/publication-detail/?id=6442472440&tab=2) (accessed 17 July 2012). 2010.
- 20 129 Boyd CM, Darer J, Boulton C, *et al.* Clinical practice guidelines and quality of care  
21 for older patients with multiple comorbid diseases. *JAMA* 2005;294:716-24.
- 22 130 Kamerow D. How can we treat multiple chronic conditions? *BMJ*  
23 2012;344:e1487 doi: 10.136/bmj.e87
- 24 131 Richmond RL, Law J, Kay-Lambkin F. Physical, mental, and cognitive function  
25 in a convenience sample of centenarians in Australia. *J Am Geriatr Soc*  
26 2011;59:1080-86.
- 27 132 Wastesson JW, Parker MG, Fastbom J, *et al.* Drug use in centenarians  
28 compared with nonagenarians and octogenarians in Sweden: a nationwide  
29 register-based study. *Age and Ageing* 2012;41:218-24.
- 30 133 Watts G. Why the exclusion of older people from clinical research must stop.  
31 *BMJ* 2012;344:e3445.
- 32 134 Frada G, Bennati E, Cardillo E, *et al.* Pharmacotherapy in the extreme  
33 longevity. *Arch Gerontol Geriatr* 2009;49:60-63.
- 34 135 McGory ML, Kao KK, Shekelle PG, *et al.* Developing quality indicators for  
35 elderly surgical patients. *Ann Surg* 2009;250:338-47.
- 36 136 Campbell SM, Braspenning J, Hutchinson A, *et al.* Research methods used in  
37 developing and applying quality indicators in primary care. *Qual Saf Health*  
38 *Care* 2002;11:358-64.
- 39 137 Vitry AI, Zhang Y. Quality of Australian clinical guidelines and relevance to the  
40 care of older people with multiple comorbid conditions. *Med J Aust*  
41 2008;189:360-65.
- 42 138 Lee SJ, Walter LC. Quality indicators for older adults. Preventing unintended  
43 harms. *JAMA* 2011;306(13):1481-82.
- 44 139 Gilbert AL, Caughey GE, Vitry AI, *et al.* Ageing well: Improving the  
45 management of patients with multiple chronic health problems. *Australas J*  
46 *Ageing* 2011;30(S2):32-37.
- 47 140 Gnjidic D, Hilmer SN, Blyth FM, *et al.* High-risk prescribing and incidence of  
48 frailty among older community-dwelling men. *Clin Pharmacol Ther*  
49 2012;91(3):521-28.
- 50  
51  
52  
53  
54  
55  
56  
57  
58  
59  
60

- 1  
2  
3 141 Sirois C, Moisan J, Poirier P, *et al.* Association between age and the initiation of  
4 antihypertensive, lipid lowering and antiplatelet medications in elderly  
5 individuals newly treated with antidiabetic drugs. *Age Ageing* 2009;38:741-45.  
6 142 Powers JH. Practice guidelines. Belief, criticism, and probability. *Arch Intern*  
7 *Med* 2011;171(1):15-16.  
8  
9  
10  
11  
12  
13  
14  
15  
16  
17  
18  
19  
20  
21  
22  
23  
24  
25  
26  
27  
28  
29  
30  
31  
32  
33  
34  
35  
36  
37  
38  
39  
40  
41  
42  
43  
44  
45  
46  
47  
48  
49  
50  
51  
52  
53  
54  
55  
56  
57  
58  
59  
60



STROBE 2007 (v4) Statement—Checklist of items that should be included in reports of cohort studies

| Section/Topic             | Item # | Recommendation                                                                                                                                                                       | Reported on page # |
|---------------------------|--------|--------------------------------------------------------------------------------------------------------------------------------------------------------------------------------------|--------------------|
| Title and abstract        | 1      | (a) Indicate the study’s design with a commonly used term in the title or the abstract                                                                                               | 1                  |
|                           |        | (b) Provide in the abstract an informative and balanced summary of what was done and what was found                                                                                  | 1-2                |
| <b>Introduction</b>       |        |                                                                                                                                                                                      |                    |
| Background/rationale      | 2      | Explain the scientific background and rationale for the investigation being reported                                                                                                 | 2-3                |
| Objectives                | 3      | State specific objectives, including any prespecified hypotheses                                                                                                                     | 3                  |
| <b>Methods</b>            |        |                                                                                                                                                                                      |                    |
| Study design              | 4      | Present key elements of study design early in the paper                                                                                                                              | 3-4                |
| Setting                   | 5      | Describe the setting, locations, and relevant dates, including periods of recruitment, exposure, follow-up, and data collection                                                      | 4                  |
| Participants              | 6      | (a) Give the eligibility criteria, and the sources and methods of selection of participants. Describe methods of follow-up                                                           | 3-4                |
|                           |        | (b) For matched studies, give matching criteria and number of exposed and unexposed                                                                                                  | N/A                |
| Variables                 | 7      | Clearly define all outcomes, exposures, predictors, potential confounders, and effect modifiers. Give diagnostic criteria, if applicable                                             | 4                  |
| Data sources/ measurement | 8*     | For each variable of interest, give sources of data and details of methods of assessment (measurement). Describe comparability of assessment methods if there is more than one group | 4                  |
| Bias                      | 9      | Describe any efforts to address potential sources of bias                                                                                                                            | 4                  |
| Study size                | 10     | Explain how the study size was arrived at                                                                                                                                            | 4                  |
| Quantitative variables    | 11     | Explain how quantitative variables were handled in the analyses. If applicable, describe which groupings were chosen and why                                                         | 4                  |
| Statistical methods       | 12     | (a) Describe all statistical methods, including those used to control for confounding                                                                                                | 4                  |
|                           |        | (b) Describe any methods used to examine subgroups and interactions                                                                                                                  | N/A                |
|                           |        | (c) Explain how missing data were addressed                                                                                                                                          | N/A                |
|                           |        | (d) If applicable, explain how loss to follow-up was addressed                                                                                                                       | N/A                |
|                           |        | (e) Describe any sensitivity analyses                                                                                                                                                | N/A                |
| <b>Results</b>            |        |                                                                                                                                                                                      |                    |

|                          |     |                                                                                                                                                                                                              |       |
|--------------------------|-----|--------------------------------------------------------------------------------------------------------------------------------------------------------------------------------------------------------------|-------|
| Participants             | 13* | (a) Report numbers of individuals at each stage of study—eg numbers potentially eligible, examined for eligibility, confirmed eligible, included in the study, completing follow-up, and analysed            | 4     |
|                          |     | (b) Give reasons for non-participation at each stage                                                                                                                                                         | 4     |
|                          |     | (c) Consider use of a flow diagram                                                                                                                                                                           | N/A   |
| Descriptive data         | 14* | (a) Give characteristics of study participants (eg demographic, clinical, social) and information on exposures and potential confounders                                                                     | 4     |
|                          |     | (b) Indicate number of participants with missing data for each variable of interest                                                                                                                          | N/A   |
|                          |     | (c) Summarise follow-up time (eg, average and total amount)                                                                                                                                                  | 4     |
| Outcome data             | 15* | Report numbers of outcome events or summary measures over time                                                                                                                                               | 5     |
| Main results             | 16  | (a) Give unadjusted estimates and, if applicable, confounder-adjusted estimates and their precision (eg, 95% confidence interval). Make clear which confounders were adjusted for and why they were included | N/A   |
|                          |     | (b) Report category boundaries when continuous variables were categorized                                                                                                                                    | N/A   |
|                          |     | (c) If relevant, consider translating estimates of relative risk into absolute risk for a meaningful time period                                                                                             | N/A   |
| Other analyses           | 17  | Report other analyses done—eg analyses of subgroups and interactions, and sensitivity analyses                                                                                                               | 5-13  |
| <b>Discussion</b>        |     |                                                                                                                                                                                                              |       |
| Key results              | 18  | Summarise key results with reference to study objectives                                                                                                                                                     | 17-18 |
| <b>Limitations</b>       |     |                                                                                                                                                                                                              |       |
| Interpretation           | 20  | Give a cautious overall interpretation of results considering objectives, limitations, multiplicity of analyses, results from similar studies, and other relevant evidence                                   | 19    |
| Generalisability         | 21  | Discuss the generalisability (external validity) of the study results                                                                                                                                        | 18-19 |
| <b>Other information</b> |     |                                                                                                                                                                                                              |       |
| Funding                  | 22  | Give the source of funding and the role of the funders for the present study and, if applicable, for the original study on which the present article is based                                                | 20    |

\*Give information separately for cases and controls in case-control studies and, if applicable, for exposed and unexposed groups in cohort and cross-sectional studies.

**Note:** An Explanation and Elaboration article discusses each checklist item and gives methodological background and published examples of transparent reporting. The STROBE checklist is best used in conjunction with this article (freely available on the Web sites of PLoS Medicine at <http://www.plosmedicine.org/>, Annals of Internal Medicine at <http://www.annals.org/>, and Epidemiology at <http://www.epidem.com/>). Information on the STROBE Initiative is available at [www.strobe-statement.org](http://www.strobe-statement.org).



**Validation of prescribing appropriateness criteria for older Australians using the RAND/UCLA Appropriateness Method**

|                                 |                                                                                                                                                                                                  |
|---------------------------------|--------------------------------------------------------------------------------------------------------------------------------------------------------------------------------------------------|
| Journal:                        | <i>BMJ Open</i>                                                                                                                                                                                  |
| Manuscript ID:                  | bmjopen-2012-001431.R2                                                                                                                                                                           |
| Article Type:                   | Research                                                                                                                                                                                         |
| Date Submitted by the Author:   | 20-Aug-2012                                                                                                                                                                                      |
| Complete List of Authors:       | Basger, Benjamin; The University of Sydney, Faculty of Pharmacy<br>Chen, Timothy; The University of Sydney, Faculty of Pharmacy<br>Moles, Rebekah; The University of Sydney, Faculty of Pharmacy |
| <b>Primary Subject Heading</b>: | Geriatric medicine                                                                                                                                                                               |
| Secondary Subject Heading:      | Research methods, Pharmacology and therapeutics, Medical education and training, Evidence based practice                                                                                         |
| Keywords:                       | drug-related problems, prescribing criteria, older patients, inappropriate drug use                                                                                                              |
|                                 |                                                                                                                                                                                                  |

SCHOLARONE™  
Manuscripts

Peer Review Only

## Validation of prescribing appropriateness criteria for older Australians using the RAND/UCLA Appropriateness Method

### ARTICLE SUMMARY

#### Article focus

- Drug-related problems (DRPs) are common in older people. They may result in drug treatment goals not being achieved and/or the occurrence of adverse drug events
- The aim of this study was to further develop and validate a previously published list of prescribing appropriateness criteria for use in older people which may be used to improve the quality of the Australian medication review process, and for quality assessment and education in medicine use

#### Key messages

- The use of medication assessment criteria is one method to assist in identifying DRPs. Criteria developed elsewhere may have little or no applicability to the Australian healthcare environment
- Validation of proposed Australian prescribing appropriateness criteria for older people was accomplished using a two-round modified Delphi method, resulting in agreement for all criteria as measured by median panel ratings, and the amount of dispersion of panel ratings, based on the interpercentile range
- Use of these criteria, together with other Australian medication review processes, may assist in improving patient care in a variety of settings by efficiently identifying DRPs to common medical conditions and commonly used medicines. They may also contribute to the medication management knowledge of health care professionals through education programs and by use in daily practice, and for the evaluation of the quality of pharmaceutical care in older people

#### Strengths and limitations

- A validated consensus method was used involving an expert medication management panel of varied specialisation. Criteria were based on established evidence-practice gaps and degree of disease burden imposed on the health care system, and were written with the aim of conciseness and clarity
- Further developmental work is required to assess the usefulness of these criteria, which only included commonly occurring medicines and medical conditions

### ABSTRACT

**Objective:** To further develop and validate previously published national prescribing appropriateness criteria to assist in identifying drug-related problems (DRPs) for commonly occurring medications and medical conditions in older ( $\geq 65$  years old) Australians.

**Design:** Rand/UCLA Appropriateness Method

**Participants:** A panel of medication management experts were identified consisting of geriatricians/pharmacologists, clinical pharmacists, and disease management advisors to

1  
2  
3 organisations that produce Australian evidence-based therapeutic publications. This resulted  
4 in a round one panel of fifteen members, and a round two panel of twelve members

5 **Main outcome measure:** Agreement on all criteria

6 **Results:** Forty eight prescribing criteria were rated. In the first rating round via email, there  
7 was disagreement regarding 17 of the criteria according to median panel ratings. During a  
8 face-to-face second round meeting, discussion resulted in retention of 25 criteria after  
9 amendments, , agreement for 14 criteria with no changes required, and deletion of 9 criteria.  
10 Two new criteria were added, resulting in a final validated list of 41 prescribing  
11 appropriateness criteria. Agreement after round two was reached for all 41 criteria, measured  
12 by median panel ratings and the amount of dispersion of panel ratings, based on the  
13 interpercentile range

14 **Conclusions:** A set of 41 Australian prescribing appropriateness criteria were validated by an  
15 expert panel. Use of these criteria, together with clinical judgement and other medication  
16 review processes such as patient interview, is intended to assist in improving patient care by  
17 efficiently detecting potential DRPs related to commonly occurring medicines and medical  
18 conditions in older Australians. These criteria may also contribute to the medication  
19 management education of health care professionals

## 20 21 22 23 24 25 26 INTRODUCTION

27  
28 Drug-related problems (DRPs) in older people ( $\geq 65$  years old) are common.[1-4] They may  
29 result in drug treatment goals not being achieved and/or disproportionately high numbers of  
30 serious adverse medication events due to polypharmacy.[5-7] DRPs can occur for many  
31 reasons such as undertreatment, inadequate monitoring of medicines, poor medicine or dose  
32 selection, duplication of medicines, or factors to do with the way the patient uses the  
33 medicine. [2 ,3 ,8-12] Methods to identify and reduce DRPs include health care professional  
34 directed educational interventions, [13] comprehensive geriatric assessment,[14]  
35 discontinuation of multiple medications, [15 ,16]electronic health record clinical decision  
36 support targeted towards certain diseases or drugs,[17 ,18]and the use of medication  
37 assessment criteria, which usually consist of explicit (that is, criterion-based rather than  
38 implicit or judgement-based) lists of prescribing recommendations for various drugs and/or  
39 disease states [13 ,19-22]

40  
41  
42  
43  
44  
45  
46  
47 In Australia, identification and resolution of DRPs are intended to be considered when  
48 patients are interviewed by an accredited pharmacist as part of the Home Medicines Review  
49 program.[23] This program aims to provide the sophistication lacking in the application of  
50 explicit measures alone, as it takes into account other issues such as the patients history and  
51 personal preferences, and is targeted towards patients who may be (among other reasons)  
52 currently taking  $\geq 5$  regular medicines, attending a number of different doctors, or have  
53 recently been discharged from hospital.[24]

1  
2  
3 In 2008, we proposed a list of 48 prescribing appropriateness criteria (45 explicit and three  
4 implicit) aimed at improving detection of DRPs as part of the Australian medication review  
5 process.[25] These criteria were intended to be applied alongside the patient interview in  
6 order to prompt appropriate history taking, particularly with respect to commonly occurring  
7 medical conditions and medicines. Similar criteria derived outside Australia have been found  
8 to have application in a variety of settings and for a variety of uses, such as in the training of  
9 health care professionals and in the evaluation of the quality of health care.[19 ,26-29] Our  
10 criteria were based on the most frequent medicines prescribed to Australians, and the most  
11 frequent medical conditions for which older Australians ( $\geq 65$  years old) consult medical  
12 practitioners. Australian medication and disease state resources and guidelines were used to  
13 provide content validity. [25]However, unlike our criteria, other prescribing criteria or tools  
14 have combined evidence with expert opinion to provide face validity.  
15  
16  
17  
18  
19

20  
21 The aim of this study was to further develop our list of criteria, supplementing it with  
22 recommendations for co-morbidity and the oldest old where possible, and adding new criteria  
23 where necessary through expert consensus. In older patients, the importance of traditional  
24 outcomes, such as discrete clinical events or mortality, may be secondary to maintaining  
25 physical or cognitive function or relief of symptoms.[30] Because of this, optimal care  
26 requires clinical decision support tools that consider issues such as patient preferences,  
27 frailty, cost and co-morbidities. [31] Additionally, few criteria target the oldest old[32]  
28 (generally regarded as people older than 85 years), where evidence may be poor, and  
29 preventive interventions may be encouraged in patients who have already exceeded an  
30 average lifespan.[33 ,34]  
31  
32  
33  
34

35 To further develop and validate our criteria list, we identified a panel of medication  
36 management experts, and chose the RAND/UCLA appropriateness method, which has been  
37 described as the best method for systematically combining recommendations from clinical  
38 guidelines, with the opinion of healthcare providers.[35]  
39  
40

## 41 **METHODS**

### 42 **Ethics**

43  
44 Ethics approval was obtained from the Human Research Ethics Committee of the University  
45 of Sydney.  
46  
47  
48

### 49 **Criteria development**

50 In 2008, we identified the 50 highest-volume Australian Pharmaceutical Benefits Scheme  
51 (PBS) medicines prescribed, and the forty most common reasons for older Australians to  
52 seek or receive healthcare. Healthcare information was obtained using the BEACH (Bettering  
53 The Evaluation and Care of Health) program, which continuously collects information about  
54 the clinical activities in general practice in Australia.[36] We then used Australian medication  
55 information sources to identify both optimal and inappropriate medication management of  
56 these common conditions.[25] In Australia, medication availability and use is largely  
57  
58  
59  
60



1  
2  
3 determined by the PBS.[37] In October 2011, commonly used medications and medical  
4 conditions were checked and updated using the BEACH program to ensure that criteria  
5 content was current. Changes in evidence, product information, Australian consensus  
6 documents, evidence-based publication recommendations or clinical practice guidelines  
7 relating to our criteria were noted for evaluation by an expert medication management panel.  
8 The criteria were designed to provide guidance on the process of care wherever it occurred –  
9 community, hospital, residential home, care home or nursing home. Major considerations in  
10 their development were likely accessibility of data from the patient, their medical notes  
11 and/or their health care professional(s), conciseness and clarity of wording, and provision of a  
12 practical number of criteria. Most were explicit to enable consistent application, with  
13 additional notes provided for interpretation where necessary. They were written as a  
14 statement of the kind of medication management that should or should not occur, to simplify  
15 comprehension and facilitate uptake.[25]  
16  
17  
18  
19

### 20 21 **Validation of criteria - participants**

22 We recruited a multidisciplinary group of medication management experts to review, update  
23 and rate the criteria, consisting of geriatrician/pharmacologists, clinical pharmacists, and  
24 disease management advisors to organisations that produce Australian evidence-based  
25 therapeutic publications. This resulted in a round one panel of fifteen members. The  
26 geriatricians consisted of two professors of geriatric medicine; an associate professor of  
27 clinical pharmacology and aged care; a research fellow in geriatric medicine; and a hospital  
28 staff geriatrician. Clinical pharmacists consisted of a residential medication management  
29 review pharmacist; a home medicines review pharmacist; four hospital-based pharmacists  
30 (two team leaders, one director and one education and training pharmacist), and a professor  
31 of aged care (Pharmacy). Disease management advisors to Australian evidence-based  
32 therapeutic organisations consisted of Therapeutic Guidelines,[38] Australian Medicines  
33 Handbook,[39] and the New South Wales Therapeutic Advisory Group.[40]  
34  
35  
36  
37  
38

### 39 **Choice of the RAND/UCLA appropriateness method**

40 We chose the RAND/UCLA appropriateness method, a two-round modified Delphi  
41 method[41] to select the most appropriate criteria. Unlike the Delphi method, which generally  
42 involves multiple questionnaire-driven rounds to obtain convergence of opinion, the RAND  
43 method involves an initial individual rating round, and a second face-to-face round. This  
44 method has been shown to produce results that have face, construct and predictive  
45 validity.[42 ,43] Systematically combining available evidence with expert opinion can create  
46 quality criteria where best evidence may be lacking.[44]  
47  
48  
49

50 While most lists of prescribing criteria are based on expert consensus, this has often been  
51 achieved through mail surveys rather than face-to-face meetings.[32 ,35 ,45] Although face-  
52 to-face meetings restrict panel size, they allow discussion to resolve misinterpretations,  
53 introduce new evidence, and improve clarity of criteria between rating rounds. We ensured  
54 our panel comprised different specialities, as less disagreement has been found among same-  
55 speciality panels.[46] We addressed concern regarding potential intimidation due to dominant  
56 panel personalities by choosing a moderator experienced in the development of these criteria  
57  
58  
59  
60

1  
2  
3 and in facilitating small group discussion. This may also have assisted with conflict-of-  
4 interest issues. We used both the median panel rating and the amount of dispersion of panel  
5 ratings to identify agreement or disagreement. While it has been acknowledged that  
6 discrepancies between these two methods may occur,[41]our aim was to achieve agreement  
7 for all accepted criteria for both methods after second round discussion.  
8  
9

### 10 **RAND/UCLA Appropriateness Method round one**

11 In October 2011 candidate panel members were emailed an explanation of the project and an  
12 invitation to participate. After acceptance, they were emailed a rating sheet consisting of 48  
13 criteria, and asked to rate each on a nine point scale. Ratings of 1-3 were classified as  
14 inappropriate, with a rating of one indicating the greatest degree of inappropriateness. Ratings  
15 of 7-9 were classified as appropriate, with a rating of nine indicating the greatest degree of  
16 appropriateness. Ratings of 4-6 were classified as neither appropriate nor inappropriate.  
17 Appropriate was defined as “the expected health benefit exceeds the expected negative  
18 consequences by a sufficiently wide margin that criteria are worth following, exclusive of  
19 cost”. They also received a description of the way in which the criteria had been derived, and  
20 a comparison with other prescribing criteria.[25 ,32] Panel members were requested to amend  
21 the wording or delete, update or identify missing criteria as required. Upon return of the  
22 rating sheets, results were tabulated. Agreement was based on four or less panellists rating  
23 outside the three-point region containing the median (1-3; 4-6; 7-9), and disagreement was  
24 based on five or more panellists rating in each extreme (1-3 and 7-9), as per the  
25 RAND/UCLA protocol for a fifteen member panel.[41]  
26  
27  
28  
29  
30  
31

### 32 **Rand/UCLA Appropriateness Method round two**

33 In November 2011, a face-to-face meeting of the expert panel, chaired by a panel moderator  
34 experienced in facilitating group discussions and criteria development, met to discuss the  
35 results of round one and re-rate each of the criteria and any potential additional criteria. One  
36 pharmacist, one staff geriatrician and a disease management advisor for a therapeutics  
37 publication could not attend, resulting in a twelve member panel. For this meeting, each panel  
38 member was provided with a copy of the results from round one. This consisted of the  
39 frequency distribution of ratings of all panellists across the 9-point scale, the overall panel  
40 median rating for each of the criteria and, for each panellist, an annotation of how they had  
41 rated each of the criteria. Scores from other panel members were not revealed. Depending  
42 upon panellists votes, panel agreement or disagreement was also stated for each of the round  
43 one criteria. Additionally, the 30th and 70th percentiles adjusted for symmetry were  
44 computed for each of the criteria, as it has been found that when ratings were symmetric with  
45 respect to the middle (five on the 1-9 scale), the interpercentile range (IPR) required to label  
46 an indication as disagreement was smaller than when they were asymmetric with respect to  
47 the middle (values far from five on the 1-9 scale). Agreement after round two occurred when  
48 the interpercentile range adjusted for symmetry (IPRAS) was greater than the IPR .[41]  
49  
50  
51  
52  
53  
54

55 We used the median method to present data at the face-to-face meeting, as it provided a clear  
56 visual interpretation of the ratings for each criterion. By the end of the meeting, our aim was  
57  
58  
59  
60

1  
2  
3 to ensure that there was agreement between the median method and the interpercentile  
4 method for all accepted criteria.  
5

6  
7 Discussion at round two occurred on the level of agreement for each of the criteria. In  
8 addition, discussion was facilitated on the wording of each of the criteria to improve clarity  
9 and decide whether agreement would be reached. The definitions of agreement and  
10 disagreement were adjusted for the smaller second round twelve member panel.[41]  
11 Agreement was reached when three or less panel members voted outside the 3-point region  
12 containing the median, or when the IPRAS was greater than the IPR. Disagreement was  
13 determined when four or more panellists rated in each extreme (1-3 and 7-9). Each of the  
14 criteria were then discussed irrespective of whether there was agreement or disagreement,  
15 with panellists having the opportunity of changing their ratings if, for example,  
16 misinterpretation had occurred because of the way in which the criteria had been written, or if  
17 new evidence had become available, or if criteria had been interpreted in the light of a  
18 panellists own clinical experience. Each panel member consented to audio recording of the  
19 discussion. Values for the median, IPR and IPRAS [41] were computed using SPSS version  
20 20 (SPSS, Chicago, IL, USA).  
21  
22  
23  
24

## 25 26 **RESULTS**

27  
28  
29  
30 After round one, there was agreement for the appropriateness of 31 of the 48 criteria, and  
31 disagreement for 17 criteria. . Of the 31 criteria for which there was agreement, discussion at  
32 round two resulted in 17 criteria being amended and retained, 2 criteria being deleted, and 12  
33 criteria accepted with no change. Of the 17 criteria for which there was disagreement,  
34 discussion at round two resulted in 8 criteria being amended and retained, 7 criteria being  
35 deleted, and 2 criteria accepted with no change. Two new criteria were added, resulting in a  
36 total of 41 validated criteria.  
37  
38

39  
40 An example of how the RAND/UCLA method was applied to each of our criteria is described  
41 in Table 1 for criterion one. The larger the IPRAS, the less asymmetric are the ratings. For  
42 example, thirteen of fifteen panellists at round one rated indicator fourteen with a score of  
43 eight or nine, for which the IPRAS was 8.35.  
44  
45

46  
47 Table 2 lists the median panel ratings, the amount of dispersion of panel ratings, and whether  
48 there was agreement or disagreement for the original criteria and the validated criteria. It also  
49 lists the amendments made by the panel to the original criteria, and the reasons for these  
50 amendments. There was 100% agreement for both median panel ratings and dispersion of  
51 panel ratings for the validated criteria. Table 3 contains the final list of validated criteria,  
52 arranged according to disease states. Table 4 lists usage information judged to be necessary  
53 for certain criteria.  
54  
55  
56  
57  
58  
59  
60

1  
2  
3  
4  
5  
6  
7  
8  
9  
10  
11  
12  
13  
14  
15  
16  
17  
18  
19  
20  
21  
22  
23  
24  
25  
26  
27  
28  
29  
30  
31  
32  
33  
34  
35  
36  
37  
38  
39  
40  
41  
42  
43  
44  
45  
46  
47  
48  
49  
50  
51  
52  
53  
54  
55  
56  
57  
58  
59  
60

| Table 1 An example of the application of the RAND/UCLA appropriateness method to one criterion ( criterion one) from round one |                                                   |                                                                                                                                                                                                                        |                                                                                                                                                    |
|--------------------------------------------------------------------------------------------------------------------------------|---------------------------------------------------|------------------------------------------------------------------------------------------------------------------------------------------------------------------------------------------------------------------------|----------------------------------------------------------------------------------------------------------------------------------------------------|
| Nine point scale where 1-3 = inappropriate, 4-6 = neither appropriate nor inappropriate, 7-9 = appropriate                     | Number of panellists rating this criterion (n=15) | Calculations, interpercentile range method[41]                                                                                                                                                                         | Interpretation                                                                                                                                     |
| 1                                                                                                                              |                                                   | 30 <sup>th</sup> percentile = <b>7.0</b>                                                                                                                                                                               | This criterion was accepted according to the median method because four or less panellists voted outside the 3 point region containing the median. |
| 2                                                                                                                              |                                                   | 70 <sup>th</sup> percentile = <b>8.0</b>                                                                                                                                                                               |                                                                                                                                                    |
| 3                                                                                                                              | 1                                                 | Interpercentile range (IPR) =                                                                                                                                                                                          |                                                                                                                                                    |
| 4                                                                                                                              |                                                   | 70 <sup>th</sup> minus 30 <sup>th</sup> percentile) =                                                                                                                                                                  |                                                                                                                                                    |
| 5                                                                                                                              | 1                                                 | <b>1.0</b> Interpercentile range                                                                                                                                                                                       |                                                                                                                                                    |
| 6                                                                                                                              | 1                                                 | central point (IPRCP) = 30 <sup>th</sup>                                                                                                                                                                               |                                                                                                                                                    |
| 7                                                                                                                              | 5                                                 | + 70 <sup>th</sup> percentile divided by 2                                                                                                                                                                             |                                                                                                                                                    |
| 8                                                                                                                              | 5                                                 | = <b>7.5</b>                                                                                                                                                                                                           |                                                                                                                                                    |
| 9                                                                                                                              | 2                                                 | Asymmetry index (AI) = [5                                                                                                                                                                                              |                                                                                                                                                    |
|                                                                                                                                | median = 7.0                                      | minus IPRCP] (as an absolute value) = <b>2.5</b>                                                                                                                                                                       | The IPRAS (6.1) was greater than the IPR (1.0) indicating no disagreement. The larger the IPRAS, the less asymmetric the ratings.                  |
|                                                                                                                                |                                                   | Interpercentile range adjusted for symmetry (IPRAS) = [2.5 plus (AI x 1.5)] = <b>6.1</b> , where 2.5 is the IPR required for disagreement when perfect symmetry exists, and 1.5 is the correction factor for asymmetry |                                                                                                                                                    |

1  
2  
3  
4  
5  
6  
7  
8  
9  
10  
11  
12  
13  
14  
15  
16  
17  
18  
19  
20  
21  
22  
23  
24  
25  
26  
27  
28  
29  
30  
31  
32  
33  
34  
35  
36  
37  
38  
39  
40  
41  
42  
43  
44  
45  
46  
47  
48  
49

| Criteria Number | Original prescribing appropriateness criteria for older ( $\geq 65$ years) Australians published in 2008[25] | Rating by median method[41] (median value, A= agreement, D= disagreement), n=15 |   | Rating by IPRAS <sup>1</sup> method[41] (IPR value, IPRAS value, A = agreement, D = disagreement), n=15 |   | Validated prescribing appropriateness criteria for older ( $\geq 65$ years) Australians as a result of this study | Rating by median method[41] (median value, A= agreement, D= disagreement), n=12 |   | Rating by IPRAS <sup>1</sup> method[41] (IPR value, IPRAS value, A = agreement, D = disagreement), n=12 |   | Amendment/reason                                                                                                                                                                                                                          |
|-----------------|--------------------------------------------------------------------------------------------------------------|---------------------------------------------------------------------------------|---|---------------------------------------------------------------------------------------------------------|---|-------------------------------------------------------------------------------------------------------------------|---------------------------------------------------------------------------------|---|---------------------------------------------------------------------------------------------------------|---|-------------------------------------------------------------------------------------------------------------------------------------------------------------------------------------------------------------------------------------------|
|                 |                                                                                                              |                                                                                 |   |                                                                                                         |   |                                                                                                                   |                                                                                 |   |                                                                                                         |   |                                                                                                                                                                                                                                           |
| 1.              | Patient taking an antihypertensive is at their target blood pressure                                         | 7                                                                               | A | 1.00, 6.10                                                                                              | A | Patient taking an antihypertensive is at the target blood pressure appropriate for them                           | 8                                                                               | A | 1.10, 7.52                                                                                              | A | “Appropriate for them” added. Current blood pressure guidelines may not be appropriate for all older patients[47-49]. For example, in the oldest old[50]; in palliative care; and for those who are/become hypotensive and/or fall[51,52] |
| 2.              | Patient at high risk of a cardiovascular event is taking a statin                                            | 7                                                                               | A | 1.00, 6.10                                                                                              | A | Patient at high risk of a recurrent cardiovascular event is taking a statin                                       | 8                                                                               | A | 1.00, 6.10                                                                                              | A | “Recurrent” added to ensure use in secondary prevention of cardiovascular events rather than primary prevention, where evidence is less clear, especially in the oldest old[33,53-57]                                                     |
| 3.              | Patient with IHD or a history of MI is taking a beta blocker                                                 | 8                                                                               | A | 2.00, 6.85                                                                                              | A | Patient with CHD or a history of MI is taking a beta blocker                                                      | 7                                                                               | A | 1.00, 6.10                                                                                              | A | “CHD” replaced “IHD”. The term “coronary heart disease” is preferred over “ischemic heart disease”                                                                                                                                        |
| 4.              | Patient with IHD or a history of MI is taking an antiplatelet agent unless on an oral anticoagulant          | 8                                                                               | A | 1.00, 7.60                                                                                              | A | Patient with CHD or a history of MI is taking an antiplatelet agent unless on an oral anticoagulant               | 8                                                                               | A | 1.00, 7.60                                                                                              | A | “CHD” replaced “IHD”. The term “coronary heart disease” is preferred over “ischemic heart disease”                                                                                                                                        |
| 5               | Patient with heart failure is taking a beta blocker                                                          | 7                                                                               | A | 1.00, 6.10                                                                                              | A | Patient with stable heart failure with left systolic ventricular dysfunction (HF-                                 | 8                                                                               | A | 0.10, 6.78                                                                                              | A | Description of heart failure amended. The use of beta blockers is contra-indicated in                                                                                                                                                     |

|     |                                                                                                                    |   |   |               |   |                                                                                                                        |   |   |               |   |                                                                                                                                                            |
|-----|--------------------------------------------------------------------------------------------------------------------|---|---|---------------|---|------------------------------------------------------------------------------------------------------------------------|---|---|---------------|---|------------------------------------------------------------------------------------------------------------------------------------------------------------|
|     |                                                                                                                    |   |   |               |   | LVSD) is taking a beta blocker                                                                                         |   |   |               |   | unstable heart failure. The optimal treatment of heart failure with preserved ejection fraction (HFPEF) is uncertain at this time[58 ,59]                  |
| 6.  | Patient with heart failure is taking an ACEI or A2A                                                                | 8 | A | 2.00<br>6.85  | A | Patient with stable heart failure with left systolic ventricular dysfunction (HF-LVSD) is taking an ACEI or A2A        | 9 | A | 1.00,<br>7.60 | A | Description of heart failure amended. The optimal treatment of heart failure with preserved ejection fraction (HFPEF) is uncertain at this time[58 ,59]    |
| 7.  | Patient with heart failure is NOT taking medications which may exacerbate heart failure                            | 9 | A | 1.00,<br>7.60 | A | Patient with HF-LVSD or HFPEF is NOT taking medications which may exacerbate heart failure                             | 9 | A | 0.10,<br>8.27 | A | Description of heart failure amended. The types of medicines contraindicated in HF-LVSD and HFPEF may not be identical[60 ,61]                             |
| 8   | Patient with heart failure or hypertension is NOT taking high sodium medications                                   | 8 | D | 2.20,<br>5.50 | A | Deleted                                                                                                                | - |   | -             | - | High sodium medicines (among others) in heart failure are addressed by indicator 7. In hypertension, they are addressed as lifestyle modifications[62 ,63] |
| 9.  | Patient with AF is taking an oral anticoagulant                                                                    | 7 | D | 2.0,<br>5.35  | A | Patient with AF is taking an oral anticoagulant or an antiplatelet agent, depending upon stroke risk and bleeding risk | 8 | A | 0.10,<br>6.93 | A | An antiplatelet agent may be appropriate for patients at low risk of stroke. Bleeding risk may determine choice of antithrombotic agent[49 ,64 ,65]        |
| 10. | Patient with AF taking an anticoagulant has an INR between 2 – 3                                                   | 8 | A | 2.20,<br>6.70 | A | Patient taking warfarin for AF has an INR between 2-3                                                                  | 9 | A | 1.00,<br>7.60 | A | New anticoagulants like rivaroxaban and dabigatran do not require INR monitoring                                                                           |
| 11. | Patient with a history of non-hemorrhagic stroke or TIA is taking an antiplatelet agent unless on an anticoagulant | 8 | A | 1.00,<br>7.60 | A | Patient with a history of non-hemorrhagic stroke or TIA is taking an antiplatelet agent unless on an anticoagulant     | 9 | A | 1.00,<br>7.60 | A | No change                                                                                                                                                  |
| 12. | Patient with risk factors for myopathy is NOT taking                                                               | 7 | D | 3.00,<br>4.60 | A | Patient with risk factors for statin induced myopathy is                                                               | 8 | A | 1.10,<br>7.52 | A | The use of all high dose high potency statins together with                                                                                                |



|     |                                                                                                                         |   |   |            |   |                                                                                                                                           |   |   |            |   |                                                                                                                                                                                                                                          |
|-----|-------------------------------------------------------------------------------------------------------------------------|---|---|------------|---|-------------------------------------------------------------------------------------------------------------------------------------------|---|---|------------|---|------------------------------------------------------------------------------------------------------------------------------------------------------------------------------------------------------------------------------------------|
|     | 40mg or more per day of simvastatin or atorvastatin                                                                     |   |   |            |   | not taking a high dose of a high potency statin                                                                                           |   |   |            |   | risk factors may increase the likelihood of myopathy[49 ,66 ,67]                                                                                                                                                                         |
| 13. | Patient with cardiovascular disease is NOT taking an NSAID                                                              | 7 | A | 1.20, 5.95 | A | Patient with cardiovascular disease is NOT taking an NSAID                                                                                | 8 | A | 1.10, 6.18 | A | No change                                                                                                                                                                                                                                |
| 14. | Patient with cardiovascular, respiratory disease or diabetes who smokes has been offered smoking cessation therapy      | 9 | A | 0.00, 8.35 | A | Patient with cardiovascular, respiratory disease or diabetes who smokes has been offered smoking cessation options                        | 9 | A | 0.00, 8.35 | A | “Therapy” implies pharmacotherapy, whereas repeated counselling/psychotherapy may be preferred to avoid the risks associated with polypharmacy                                                                                           |
| 15. | Patient with type 2 diabetes and hypertension and albuminuria is taking an ACEI or A2A                                  | 8 | A | 2.00, 6.85 | A | Patient with type 2 diabetes and hypertension and albuminuria is taking an ACEI or A2A                                                    | 9 | A | 1.00, 7.60 | A | No change.                                                                                                                                                                                                                               |
| 16. | Patient with diabetes at high risk of a cardiovascular event is taking an antiplatelet agent unless on an anticoagulant | 7 | D | 2.20, 5.50 | A | Patient with diabetes at high risk of a cardiovascular event is taking an antiplatelet agent unless on an anticoagulant                   | 9 | A | 1.00, 7.60 | A | No change                                                                                                                                                                                                                                |
| 17. | Patient with diabetes is NOT taking a medication which may increase or decrease blood glucose concentrations            | 5 | D | 2.20, 3.70 | A | Patient with diabetes receiving medications that may affect glycemic control is having regular monitoring of blood glucose concentrations | 9 | A | 1.00, 7.60 | A | Increased awareness and monitoring may require adjustment of hypoglycemic medication doses, depending upon the need to continue interacting medicines. For example, commencement of oral corticosteroids may worsen diabetes control[39] |
| 18. | Patient with diabetes has had an HbA1c measurement within the previous 6 months                                         | 8 | A | 1.20, 7.45 | A | Patient with diabetes has had an HbA1c measurement within the previous 6 months                                                           | 8 | A | 1.00, 7.60 | A | No change                                                                                                                                                                                                                                |
| 19. | Patient taking metformin for diabetes has had the dose adjusted for                                                     | 8 | A | 1.20, 7.45 | A | Patient taking metformin for diabetes has had the dose adjusted for renal function                                                        | 9 | A | 1.00, 7.60 | A | Creatinine clearance may represent only one of the methods used to determine                                                                                                                                                             |

|     |                                                                                                         |   |   |            |   |                                                                                                                       |   |   |            |   |                                                                                                                                                                                                                                |
|-----|---------------------------------------------------------------------------------------------------------|---|---|------------|---|-----------------------------------------------------------------------------------------------------------------------|---|---|------------|---|--------------------------------------------------------------------------------------------------------------------------------------------------------------------------------------------------------------------------------|
|     | creatinine clearance                                                                                    |   |   |            |   |                                                                                                                       |   |   |            |   | renal function                                                                                                                                                                                                                 |
| 20. | Patient taking metformin for diabetes is NOT concurrently taking glibenclamide                          | 6 | D | 2.40, 3.85 | A | Deleted                                                                                                               | - |   | -          | - | Glibenclamide is an uncommonly used hypoglycaemic                                                                                                                                                                              |
| 21. | Patient with OA pain interfering with daily activities has been trialled on paracetamol 2 – 4 g per day | 8 | A | 2.00, 6.85 | A | Patient with OA pain interfering with daily activities has been trialled on regular paracetamol 2 – 4 g per day       | 9 | A | 0.40, 8.05 | A | “Regular” paracetamol added to improve quality of indicator                                                                                                                                                                    |
| 22. | Patient taking analgesic(s) does NOT have pain that interferes with daily activities                    | 7 | D | 3.2, 4.75  | A | Patient taking analgesic(s) has had the dose(s) titrated in order to avoid pain that interferes with daily activities | 8 | A | 2.00, 6.85 | A | Indicator rephrased to improve clarity                                                                                                                                                                                         |
| 23. | Patient taking an opioid is on prophylactic treatment for constipation                                  | 8 | A | 2.00, 6.85 | A | Patient taking a regular opioid is on prophylactic treatment for constipation                                         | 9 | A | 1.00, 7.60 | A | “Regular” use added as “when required” use may not always require prophylactic treatment                                                                                                                                       |
| 24. | Patient with risk factors for impaired renal function is NOT taking an NSAID                            | 8 | A | 1.00, 7.60 | A | Patient with risk factors for impaired renal function is NOT taking an NSAID                                          | 8 | A | 1.00, 7.60 | A | No change                                                                                                                                                                                                                      |
| 25. | Patient is NOT concurrently taking an ACEI or A2A, diuretic and NSAID (excluding low dose aspirin)      | 9 | A | 1.00, 7.60 | A | Patient is NOT concurrently taking an ACEI or A2A, diuretic and NSAID (excluding low dose aspirin)                    | 9 | A | 1.00, 7.60 | A | No change                                                                                                                                                                                                                      |
| 26. | Patient with sleep disturbance or anxiety has NOT been taking benzodiazepines for > 4 weeks             | 8 | A | 1.20, 7.45 | A | Patient has NOT been taking benzodiazepines for > 4 weeks                                                             | 9 | A | 1.00, 7.60 | A | “Sleep disturbance or anxiety” deleted. Benzodiazepines increase the risk of oversedation, ataxia, confusion, falls, respiratory depression and short-term memory impairment, and are recommended for short term use only[39]. |
| 27. | Patient with depression is NOT taking                                                                   | 7 | D | 1.00, 4.60 | A | Deleted                                                                                                               | - |   | -          | - | The issue of anticholinergic burden is addressed by                                                                                                                                                                            |

|     |                                                                                                               |   |   |            |   |                                                                                                                 |   |   |            |   |                                                                                                 |
|-----|---------------------------------------------------------------------------------------------------------------|---|---|------------|---|-----------------------------------------------------------------------------------------------------------------|---|---|------------|---|-------------------------------------------------------------------------------------------------|
|     | anticholinergic type antidepressants                                                                          |   |   |            |   |                                                                                                                 |   |   |            |   | indicator 32                                                                                    |
| 28. | Patient with a history of falls is NOT taking psychotropic medications                                        | 8 | A | 1.00, 6.10 | A | Patient with a history of falls is NOT taking psychotropic medications                                          | 8 | A | 1.40, 6.40 | A | No change                                                                                       |
| 29. | Patient taking an SSRI is NOT concurrently taking medications known to increase the risk of GI bleeding       | 7 | D | 2.20, 5.20 | A | Deleted                                                                                                         | - |   | -          | - | Redundant indicator. This issue would be identified by indicator 47.                            |
| 30. | Patient taking an SSRI is NOT concurrently taking other medications that may contribute to serotonin toxicity | 8 | A | 2.20, 6.70 | A | Patient taking an SSRI is NOT concurrently taking other medications that may contribute to serotonin toxicity   | 8 | A | 1.40, 6.40 | A | No change. Retained by panel due to its potential significance, despite the use of indicator 47 |
| 31. | Patient with dementia is NOT receiving anticholinergic medication                                             | 8 | A | 1.20, 7.45 | A | Patient with dementia is NOT receiving anticholinergic medication                                               | 8 | A | 1.00, 7.60 | A | No change                                                                                       |
| 32. | Patient is NOT taking more than one medication with anticholinergic activity                                  | 8 | A | 0.2, 6.70  | A | Patient is not taking medication with SIGNIFICANT anticholinergic activity                                      | 8 | A | 0.40, 7.15 | A | Rewording focuses on the issue of anticholinergic burden                                        |
| 33. | Patient taking a PPI is NOT taking a medication that may cause dyspepsia                                      | 7 | D | 3.20, 4.45 | A | Patient taking a PPI is NOT taking a medication that may cause dyspepsia unless prescribed for gastroprotection | 8 | A | 0.40, 7.15 | A | “Unless prescribed for gastroprotection” added to improve the accuracy of the indicator         |
| 34. | Patient with COPD is NOT taking benzodiazepines                                                               | 7 | D | 3.00, 6.10 | A | Patient with COPD is NOT taking benzodiazepines                                                                 | 8 | A | 1.00, 6.10 | A | No change                                                                                       |
| 35. | Patient with asthma using an inhaled LABA is also using an inhaled corticosteroid                             | 9 | A | 0.20, 8.20 | A | Patient with asthma using an inhaled LABA is also using an inhaled corticosteroid                               | 9 | A | 1.00, 7.60 | A | No change                                                                                       |
| 36. | Patient using salbutamol or terbutaline inhaler more                                                          | 9 | A | 1.00, 7.60 | A | Patient using salbutamol or terbutaline inhaler more than                                                       | 9 | A | 0.40, 8.05 | A | “Except for exercise-induced asthma” added to improve the                                       |

|     |                                                                                                                                                 |   |   |            |   |                                                                                                                 |   |   |            |   |                                                                                                                          |
|-----|-------------------------------------------------------------------------------------------------------------------------------------------------|---|---|------------|---|-----------------------------------------------------------------------------------------------------------------|---|---|------------|---|--------------------------------------------------------------------------------------------------------------------------|
|     | than 3 times per week for reversible airways disease has been prescribed an ICS                                                                 |   |   |            |   | 3 times per week for reversible airways disease has been prescribed an ICS (except for exercise-induced asthma) |   |   |            |   | accuracy of the indicator                                                                                                |
| 37. | Patient with asthma is NOT taking a medication that may worsen asthma                                                                           | 7 | A | 1.20, 6.25 | A | Patient with asthma is NOT taking a medication that may worsen asthma                                           | 8 | A | 1.00, 7.60 | A | No change                                                                                                                |
| 38. | Female patient with recurrent UTIs has been prescribed intravaginal estrogen                                                                    | 5 | D | 2.00, 3.85 | A | Deleted                                                                                                         | - |   | -          | - | Evidence for this indicator was judged to be poor[68]                                                                    |
| 39. | Patient with a creatinine clearance < 60 ml/min is NOT receiving nitrofurantoin for UTI                                                         | 8 | A | 2.00, 6.85 | A | Patient with a UTI is not receiving nitrofurantoin or hexamine for prophylaxis or acute treatment               | 8 | A | 1.00, 7.60 | A | Hexamine and nitrofurantoin are not recommended for the prophylactic or acute treatment of UTI in older patients[39 ,49] |
| 40. | Patient with a creatinine clearance < 50ml/min is NOT receiving hexamine for UTI prophylaxis                                                    | 8 | A | 1.20, 6.25 | A | Deleted                                                                                                         | - | - | -          | - | Hexamine and are not recommended for the prophylactic treatment of UTI in older patients[39 ,49].                        |
| 41. | Patient with an URTI is NOT receiving antibiotics                                                                                               | 7 | D | 3.00, 4.60 | A | Patient with a non-specific URTI is NOT receiving antibiotics                                                   | 8 | A | 1.00, 7.60 | A | “non-specific” added to improve the accuracy of the indicator                                                            |
| 42. | Patient with osteoporosis who is not receiving at least 600 IU Vitamin D daily from dietary sources is receiving supplementation with vitamin D | 8 | D | 3.20, 4.75 | A | Deleted                                                                                                         | - |   | -          | - | This indicator is covered by indicator 44 and an expanded footnote                                                       |
| 43. | Patient with osteoporosis who is not receiving at least 1200 mg of calcium daily from dietary sources is receiving calcium                      | 8 | A | 1.60, 5.95 | A | Deleted                                                                                                         | - |   | -          | - | This indicator is covered by indicator 44 and an expanded footnote                                                       |

1  
2  
3  
4  
5  
6  
7  
8  
9  
10  
11  
12  
13  
14  
15  
16  
17  
18  
19  
20  
21  
22  
23  
24  
25  
26  
27  
28  
29  
30  
31  
32  
33  
34  
35  
36  
37  
38  
39  
40  
41  
42  
43  
44  
45  
46  
47  
48  
49

|     |                                                                                                                    |   |   |            |   |                                                                                                                                                 |   |   |            |   |                                                                                                                                                                                                                                                                                                                                           |
|-----|--------------------------------------------------------------------------------------------------------------------|---|---|------------|---|-------------------------------------------------------------------------------------------------------------------------------------------------|---|---|------------|---|-------------------------------------------------------------------------------------------------------------------------------------------------------------------------------------------------------------------------------------------------------------------------------------------------------------------------------------------|
|     | supplementation                                                                                                    |   |   |            |   |                                                                                                                                                 |   |   |            |   |                                                                                                                                                                                                                                                                                                                                           |
| 44. | Patient with osteoporosis is receiving anti-osteoporotic medication                                                | 7 | A | 1.00, 6.10 | A | Patient with osteoporosis is receiving appropriate anti-osteoporotic medication                                                                 | 8 | A | 0.40, 7.15 | A | “Appropriate” added and an expanded footnote to include calcium and vitamin D                                                                                                                                                                                                                                                             |
| 45. | Patient using topical corticosteroids does NOT have itch or discomfort that interferes with daily activities       | 6 | D | 2.00, 5.35 | A | Patient using topical corticosteroids for contact or allergic dermatitis does not have itch or discomfort that interferes with daily activities | - |   | -          | - | This indicator was deleted by the panel because there was no identification of the diagnosis/condition being treated. However, contact and allergic dermatitis is one of the top 40 most frequently managed problems by general practitioners in patients ≥ 65 years old in Australia,[36] so this indicator was re-worded by the authors |
| 46. | Patient has received influenza and pneumococcal vaccination                                                        | 9 | A | 1.00, 7.60 | A | Patient has received influenza and pneumococcal vaccination                                                                                     | 9 | A | 0.00, 8.35 | A | No change                                                                                                                                                                                                                                                                                                                                 |
| 47. | Patient has no <i>significant</i> medication interactions (agreement between two medication interaction databases) | 8 | D | 3.00, 6.10 | A | Patient has no <i>clinically significant</i> medication interactions (agreement between two medication interaction databases)                   | 8 | A | 0.40, 7.15 | A | “Clinically” added to improve the accuracy of the indicator                                                                                                                                                                                                                                                                               |
| 48. | Patient has had no <i>significant</i> change in medications in the previous 90 days                                | 5 | D | 1.20, 3.25 | A | Deleted                                                                                                                                         | - |   | -          | - | It was preferred to transfer this information to the explanatory text of the article                                                                                                                                                                                                                                                      |
| New |                                                                                                                    |   |   |            |   | Patient taking thyroid hormone replacement therapy has had a serum TSH measurement within the previous 12 months                                |   |   |            |   | Thyroid disease is a common medical condition managed by GPs in older Australians[36 ,69]                                                                                                                                                                                                                                                 |
| New |                                                                                                                    |   |   |            |   | Patient with coronary heart disease is taking an ACEI or A2A                                                                                    |   |   |            |   | ACEIs or A2As reduce the risk of cardiovascular events[70 ,71]. However, a high incidence of comorbid disease                                                                                                                                                                                                                             |





Table 3 Validated prescribing appropriateness criteria for older Australians ( $\geq 65$  years) for commonly used medications and medical conditions<sup>a,b,c</sup> (\*for usage information for certain criteria, see Table 4)

| Criteria No. | Validated criteria                                                                                                                                                        |
|--------------|---------------------------------------------------------------------------------------------------------------------------------------------------------------------------|
| 1            | Patient taking an antihypertensive is at the target blood pressure appropriate for them*                                                                                  |
| 2            | Patient at high risk of a recurrent cardiovascular event is taking a statin*                                                                                              |
| 3            | Patient with CHD or a history of MI is taking a beta blocker                                                                                                              |
| 4            | Patient with CHD or a history of MI is taking an antiplatelet agent unless taking an oral anticoagulant*                                                                  |
| 5            | Patient with CHD is taking an ACEI or A2A*                                                                                                                                |
| 6            | Patient with stable heart failure with HF-LVSD is taking a beta blocker                                                                                                   |
| 7            | Patient with stable heart failure with HF-LVSD is taking an ACEI or A2A*                                                                                                  |
| 8            | Patient with HF-LVSD or HFPEF is NOT taking medications which may exacerbate heart failure                                                                                |
| 9            | Patient with AF is taking an oral anticoagulant or an antiplatelet agent, depending upon stroke risk and bleeding risk*                                                   |
| 10           | Patient taking warfarin for AF has an INR between 2-3                                                                                                                     |
| 11           | Patient with a history of non-hemorrhagic stroke or TIA is taking an antiplatelet agent unless taking an anticoagulant                                                    |
| 12           | Patient with risk factors for statin induced myopathy is not taking a high dose of a high potency statin*                                                                 |
| 13           | Patient with cardiovascular disease is NOT taking an NSAID                                                                                                                |
| 14           | Patient with cardiovascular, respiratory disease or diabetes who smokes has been offered smoking cessation options*                                                       |
| 15           | Patient with type 2 diabetes and hypertension and albuminuria is taking an ACEI or A2A                                                                                    |
| 16           | Patient with diabetes at high risk of a cardiovascular event is taking an antiplatelet agent unless on an anticoagulant                                                   |
| 17           | Patient with diabetes taking medications that may affect glycemic control is receiving regular monitoring of blood glucose concentrations*                                |
| 18           | Patient with diabetes has had an HbA1c measurement within the previous 6 months*                                                                                          |
| 19           | Patient taking metformin for diabetes has had the dose adjusted for renal function*                                                                                       |
| 20           | Patient taking thyroid hormone replacement therapy has had a serum TSH measurement within the previous 12 months                                                          |
| 21           | Patient with OA pain interfering with daily activities has been trialled on regular paracetamol 2 – 4 g per day                                                           |
| 22           | Patient taking analgesic(s) has had the dose(s) titrated in order to avoid pain that interferes with daily activities                                                     |
| 23           | Patient taking a regular opioid is on prophylactic treatment for constipation                                                                                             |
| 24           | Patient with risk factors for impaired renal function is NOT taking an NSAID*                                                                                             |
| 25           | Patient is NOT concurrently taking an ACEI or A2A, diuretic and NSAID (excluding low dose aspirin)                                                                        |
| 26           | Patient has NOT been taking benzodiazepines for > 4 weeks*                                                                                                                |
| 27           | Patient with a history of falls is NOT taking psychotropic medications*                                                                                                   |
| 28           | Patient taking an SSRI is NOT concurrently taking other medications that may contribute to serotonin toxicity*                                                            |
| 29           | Patient with dementia is NOT receiving anticholinergic medication*                                                                                                        |
| 30           | Patient is not taking medication with SIGNIFICANT anticholinergic activity*                                                                                               |
| 31           | Patient taking a PPI is NOT taking a medication that may cause dyspepsia unless prescribed for gastroprotection*                                                          |
| 32           | Patient with COPD is NOT taking benzodiazepines                                                                                                                           |
| 33           | Patient with asthma using an inhaled LABA is also using an inhaled corticosteroid                                                                                         |
| 34           | Patient using salbutamol or terbutaline inhaler more than 3 times per week for reversible airways disease has been prescribed an ICS (except for exercise-induced asthma) |
| 35           | Patient with asthma is NOT taking a medication that may worsen asthma*                                                                                                    |
| 36           | Patient with a UTI is not receiving nitrofurantoin or hexamine for prophylaxis or acute treatment                                                                         |
| 37           | Patient with a non-specific URTI is NOT receiving antibiotics*                                                                                                            |
| 38           | Patient with osteoporosis is receiving appropriate anti-osteoporotic medication*                                                                                          |

|    |                                                                                                                                                 |
|----|-------------------------------------------------------------------------------------------------------------------------------------------------|
| 39 | Patient has received influenza and pneumococcal vaccination                                                                                     |
| 40 | Patient using topical corticosteroids for contact or allergic dermatitis does not have itch or discomfort that interferes with daily activities |
| 41 | Patient has no <i>clinically significant</i> medication interactions (agreement between two medication interaction databases)*                  |

a – These criteria are intended to be used by appropriately trained and qualified health professionals, as a tool to assist in making medication management decisions as part of the medication review process

b – Prior to the commencement of any medication, the contraindications and precautions for that medication should be considered

c – The intended result of using these criteria is the reasonable and appropriate medication management of individual patients, rather than the systematic application of these criteria to all patients irrespective of other considerations

A2A = angiotensin 2 receptor antagonist, ACEI = angiotensin converting enzyme inhibitor, AF = atrial fibrillation, CHD = coronary heart disease, COPD = chronic obstructive pulmonary disease, HbA1c = glycosylated haemoglobin, HF-LVSD = Heart failure with left ventricular systolic dysfunction, HFPEF = heart failure with preserved ejection fraction, ICS = inhaled corticosteroid, INR = international normalised ratio, MI = myocardial infarct, LABA = long acting beta agonist, NSAID = non-steroidal anti-inflammatory drug, PPI = proton pump inhibitor, SSRI = selective serotonin reuptake inhibitor, TIA = transient ischemic attack, TSH = thyroid stimulating hormone, UTI = urinary tract infection.

| Criteria No. | Description of issue                                                            | Details                                                                                                                                                                                                                                                                                                                                                                                                                                                                                              |
|--------------|---------------------------------------------------------------------------------|------------------------------------------------------------------------------------------------------------------------------------------------------------------------------------------------------------------------------------------------------------------------------------------------------------------------------------------------------------------------------------------------------------------------------------------------------------------------------------------------------|
| 1            | Blood pressure targets (mm Hg)                                                  | Proteinuria >1 g/day (with or without diabetes) < 125/75. CHD, diabetes, chronic kidney disease, proteinuria (> 300mg/day), stroke or TIA < 130/80. Others <140/90[39] Current blood pressure guidelines may not be appropriate for all older patients, such as the oldest old; in palliative care; and for those who are/become hypotensive and/or fall[47 ,49-52 ,73]                                                                                                                              |
| 2            | Patients at high risk of a cardiovascular event (> 15% within the next 5 years) | Age > 75 years; history of diabetes, moderate or severe chronic kidney disease (persistent proteinuria, GFR < 60ml/min, eGFR < 45 ml/min/1.73m <sup>2</sup> ), hypercholesterolemia (familial, TC > 7.5 mmol/L), SBP ≥ 180 or DBP ≥ 110 mmHg, ISH (SBP ≥160 and DBP ≤70 mmHg), coronary heart disease, stroke, TIA, PAD, heart failure, aortic disease, LVH, family history of premature CVD.[39 ,74] The benefits of statins and risks of adverse effects are uncertain towards the end of life[75] |
| 4            | Antiplatelet agents and oral anticoagulants                                     | Antiplatelet agents – aspirin, clopidogrel, dipyridamole, ticlopidine. Oral anticoagulants – dabigatran, phenindione, rivaroxaban, warfarin                                                                                                                                                                                                                                                                                                                                                          |
| 5            | Use of ACEI or A2A in CHD                                                       | A high incidence of comorbid disease in CHD (typically arthritis and/or respiratory disease) or other clinical factors (e.g. dizziness or falls, cognitive impairment, use of > 5 medicines, patient preference) may be considerations in determining medication prescribing priorities[30 ,34 ,72]                                                                                                                                                                                                  |
| 8            | Medications that may exacerbate heart failure                                   | HF-LVSD – anti-arrhythmic medicines (except for heart failure-specific beta-blockers and amiodarone), non-dihydropyridine calcium-channel blockers (e.g. verapamil or diltiazem), clozapine, corticosteroids, NSAIDs (excluding low dose aspirin), thiazolidinediones, TNF-alpha inhibitors, topical beta blockers (when added to systemic beta blockers), tricyclic antidepressants[49 ,76 ,77]. HFPEF – venodilators (e.g. isosorbide dinitrate), potent arterial                                  |

|           |                                                                     |                                                                                                                                                                                                                                                                                                                                                                                                                                                                    |
|-----------|---------------------------------------------------------------------|--------------------------------------------------------------------------------------------------------------------------------------------------------------------------------------------------------------------------------------------------------------------------------------------------------------------------------------------------------------------------------------------------------------------------------------------------------------------|
|           |                                                                     | vasodilators (e.g. hydralazine), digoxin (unless AF), excessive use of diuretics. Note; verapamil and diltiazem may improve diastolic function in HFPEF[60]                                                                                                                                                                                                                                                                                                        |
| 9         | Stroke risk and bleeding risk                                       | Stroke risk can be calculated using CHADS <sub>2</sub> or CHA <sub>2</sub> DS <sub>2</sub> -VASc.[78] Risk factors for coumarin-related bleeding complications: advanced age, uncontrolled hypertension, history of MI or IHD, cerebrovascular disease, anaemia or a history of bleeding, concomitant use of aspirin/polypharmacy[79]                                                                                                                              |
| 12        | Risk factors for statin myopathy; high dose of high potency statins | Age > 70 years, presence of disease states (diabetes, hypothyroidism, renal and hepatic disease), concurrent use of cyclosporin, fibrates, CYP3A4 inhibitors (e.g. diltiazem, macrolides, protease inhibitors, verapamil [except for pravastatin and rosuvastatin], severe intercurrent illness (infection, trauma, metabolic disorder), dose ≥ 40 mg daily. High dose of high potency statins ; ≥ 40 mg atorvastatin or simvastatin; > 10mg rosuvastatin [39 ,80] |
| 14        | Smoking cessation options                                           | Counselling (extended, brief, telephone), support services (professional, family, social, work), pharmacotherapy.                                                                                                                                                                                                                                                                                                                                                  |
| 17        | Medications that may affect glycemic control                        | Increase blood glucose: baclofen, clozapine, cyclosporin, glucocorticoids, haloperidol, olanzapine, paliperidone, phenytoin, protease inhibitors, quetiapine, risperidone, sirolimus, tacrolimus, and tricyclic antidepressants. Decrease blood glucose: excessive alcohol, disopyramide, perhexiline, quinine, trimethoprim/sulphamethoxazole[39]                                                                                                                 |
| 18        | Six monthly HbA1c measurements                                      | Treatment intensification in response to less than optimally controlled HbA1c may be inappropriate in patients with limited life expectancy or in frail older patients[81 ,82]                                                                                                                                                                                                                                                                                     |
| 19        | Metformin dose                                                      | Based on creatinine clearance: 60-90 ml/min, maximum 2g daily; 30-60 ml/min, maximum 1g daily; < 30 ml/min avoid use.[39] Based on eGFR: Review dose if eGFR< 45 ml/min/1.73m <sup>2</sup> ; avoid if eGFR<30 ml/min/1.73m <sup>2</sup> [83]                                                                                                                                                                                                                       |
| 24        | Risk factors for impaired renal function                            | Volume depletion, age > 60 years, salt-restricted diet, concomitant use of ACEIs, A2As, cyclosporin or aspirin, GFR ≤ 60 ml/min, cirrhosis, heart failure[84]                                                                                                                                                                                                                                                                                                      |
| 26        | Benzodiazepine use                                                  | Benzodiazepines increase the risk of oversedation, ataxia, confusion, falls, respiratory depression and short-term memory impairment, and are recommended for short term use only.[39]                                                                                                                                                                                                                                                                             |
| 27        | Falls and psychotropic medications                                  | Psychotropic medications = antidepressants (all), anxiolytics/hypnotics, antipsychotics.[85 ,86] Medications causing (postural) hypotension (e.g. cardiovascular medicines) or cognitive impairment (e.g. opioids) may also increase the risk of falls[49 ,87]                                                                                                                                                                                                     |
| 28        | Medications that may contribute to serotonin syndrome               | Antidepressants - desvenlafaxine, duloxetine, St John's wort, MAOIs (including moclobemide), SSRIs, TCAs, venlafaxine. Opioids - dextromethorphan, fentanyl, pethidine, tramadol. Others - selegiline, linezolid, lithium, tryptophan[39]                                                                                                                                                                                                                          |
| 29 and 30 | Medications with significant anticholinergic activity               | amantadine, amitriptyline, atropine*, belladonna alkaloids*, benzhexol, benzotropine, biperiden, brompheniramine*, chlorpheniramine, chlorpromazine, clomipramine, clozapine, cyclizine, cyclopentolate, cyproheptadine*, darifenacin, dexchlorpheniramine*, dimenhydrinate*, diphenhydramine*, disopyramide, dothiepin, doxepin, glycopyrrolate,                                                                                                                  |

|    |                                                |                                                                                                                                                                                                                                                                                                                                                                                                                                                                                                                                                                                                                                                                                                                                                                                                                                                                                                                                                                                                                                                          |
|----|------------------------------------------------|----------------------------------------------------------------------------------------------------------------------------------------------------------------------------------------------------------------------------------------------------------------------------------------------------------------------------------------------------------------------------------------------------------------------------------------------------------------------------------------------------------------------------------------------------------------------------------------------------------------------------------------------------------------------------------------------------------------------------------------------------------------------------------------------------------------------------------------------------------------------------------------------------------------------------------------------------------------------------------------------------------------------------------------------------------|
|    |                                                | homatropine, hyoscine* (butylbromide or hydrobromide), imipramine, ipratropium (nebulised), mianserin, nortriptyline, olanzapine, orphenadrine, oxybutynin, pericyazine, pheniramine*, pimozone, pizotifen, prochlorperazine, promethazine*, propantheline, solifenacin, tiotropium, tolterodine, trimeprazine*, trimipramine, triprolidine*, tropicamide (* available over-the-counter in Australia)[39]                                                                                                                                                                                                                                                                                                                                                                                                                                                                                                                                                                                                                                                |
| 31 | Medications that may cause dyspepsia           | Drugs with anticholinergic effects, aspirin, benzodiazepines, bisphosphonates, calcium channel antagonists, oral corticosteroids, dopaminergic drugs, doxycycline, erythromycin, ferrous sulphate, nitrates, NSAIDs, potassium chloride (slow release)[38,39,49,88]                                                                                                                                                                                                                                                                                                                                                                                                                                                                                                                                                                                                                                                                                                                                                                                      |
| 35 | Medications that may worsen asthma             | Aspirin, beta blockers (including eye drops), carbamazepine, echinacea, NSAIDs, royal jelly[39,89]                                                                                                                                                                                                                                                                                                                                                                                                                                                                                                                                                                                                                                                                                                                                                                                                                                                                                                                                                       |
| 38 | Non-specific URTI                              | Acute bronchitis, pharyngitis, tonsillitis, nonsuppurative otitis media and sinusitis[38]                                                                                                                                                                                                                                                                                                                                                                                                                                                                                                                                                                                                                                                                                                                                                                                                                                                                                                                                                                |
| 39 | Appropriate anti-osteoporotic medication       | Recommended daily intake (RDI) of calcium from dietary sources and/or supplements = 1300-1500 mg daily. RDI for Vitamin D from sunlight and/or dietary sources and/or supplements = 600 iu daily. Anti-osteoporotic medication = bisphosphonates, calcitriol, denosumab, HRT, raloxifene, strontium, teriparatide.[39] Evidence for fracture risk reduction in women $\geq 75$ years is either absent or lacking in NVF for alendronate, risedronate and teriparatide, and in HF for alendronate, risedronate, zoledronic acid and teriparatide. There is no data available for denosumab in VF, NVF or HF.[90] The optimal duration of bisphosphonate therapy is uncertain. Evidence supports the use of strontium for 5 years, raloxifene for 4 years, zoledronic acid and denosumab for 3 years. Exposure to teriparatide should be limited to 18 months.[91] Data are limited for non-ambulatory patients and those with significant comorbidities.[92] It should be noted that bone strength is only one of many determinants of fracture risk.[93] |
| 42 | Clinically significant medication interactions | Medication interactions that may interfere with the outcome of therapy                                                                                                                                                                                                                                                                                                                                                                                                                                                                                                                                                                                                                                                                                                                                                                                                                                                                                                                                                                                   |

A2A = angiotensin 2 receptor antagonist, ACE = angiotensin converting enzyme, ACEI = angiotensin converting enzyme inhibitor, AF = atrial fibrillation, CHADS<sub>2</sub> = Cardiac failure, Hypertension, Age, Diabetes, Stroke [doubled], CHA<sub>2</sub>DS<sub>2</sub>-VASc = Cardiac failure or dysfunction, Hypertension, Age over 75 years [doubled], Diabetes, Stroke [doubled], Vascular disease, Age 65-74 years, Sex category [female], CHD = coronary heart disease, CVD = cardiovascular disease, DBP = diastolic blood pressure, GFR = glomerular filtration rate, HF = hip fracture, HF-LVSD = Heart failure with left ventricular systolic dysfunction, HFPEF = heart failure with preserved ejection fraction, HRT = hormone replacement therapy, IHD = ischemic heart disease, ISH = isolated systolic hypertension, LVH = left ventricular hypertrophy, MAOI = monoamine oxidase inhibitor, MI = myocardial infarct, NSAID = non-steroidal anti-inflammatory drug, NVF = non-vertebral fracture, PAD = peripheral arterial disease, SBP = systolic blood pressure, SSRI = selective serotonin reuptake inhibitor, TC = total cholesterol, TCA = tricyclic antidepressant, TIA = transient ischemic attack, TNF = tumour necrosis factor, URTI = upper respiratory tract infection, VF = vertebral fracture

## DISCUSSION

This study identified a panel of medication management experts to discuss and validate a set of 41 prescribing appropriateness criteria for commonly used medicines and medical conditions in older ( $\geq 65$  years) Australians. Panel discussion resulted in retention of 39 of the

originally proposed 48 criteria, with 25 being reworded, and 14 accepted with no change. These criteria do not simply represent a list of medications to avoid in the elderly, but also address issues such as the need for additional therapy (e.g. criteria 23 and 34, Table 3), additional tests (e.g. criteria 18-20, Table 3), ineffective treatment (e.g. criteria 22 and 37, Table 3) and medication monitoring (e.g. criteria 10 and 20, Table 3). They were designed to contribute to the Australian quality use of medicines (QUM) process.[94] The information required to apply these criteria may be obtained from the patient or their carer, and patient medical notes and/or their health care professional. [95] It may also be provided by a Home Medicines Review referral form from the patients general practitioner.[23] Due to their currency and the nature of their development, we expect these criteria to make a significant contribution to the detection of DRPs in the Australian healthcare environment. For example, in a review of prescribing indicators for two conditions, [36] which are common in older people in Australia – type two diabetes and cardiovascular disease [96 ,97] – disease and drug-orientated criteria such as ours have shown good content, face, concurrent and predictive validity and operational feasibility, as well as use for internal and external quality assessment in both ambulatory and hospital care.[35] Evidence-practice gaps in Australia have been identified in other areas besides diabetes and cardiovascular disease, such as in asthma, pain and vaccination status.[9 ,98-101] The existence of these gaps formed part of the developmental process for these criteria.

### **Prescribing appropriateness tools in Australia**

Appropriateness of prescribing has been assessed by measures that are explicit or implicit, in an effort to identify and reduce DRPs.[102] In Australia, both types of measures have been used.[103-107] However, they have been imported into the Australian healthcare environment, with consequent shortcomings related to both the intrinsic nature of the measure, as well as environment compatibility issues. For example, in a study evaluating the impact of Home Medicine Reviews on appropriateness of prescribing, a significant number of recommendations made regarding the need for monitoring and addition of missing therapy were found to have no impact on explicitly derived scores using the Medication Appropriateness Index,[103] due to the intrinsic shortcomings of this tool. This is not a tool that gives precise guidance in relation to specific medicines.[13]

The Beers criteria,[108] perhaps the tool most widely used to assess inappropriate prescribing in older people, has been used in Australia, but requires modification to exclude medicines not listed for government subsidy.[107] This is because medicine availability and use in Australia is largely determined by the Australian Pharmaceutical Benefits Scheme[37]. Other Australian studies have found that some medicines listed as inappropriate by Beers may be appropriate for certain older people according to Australian practice:[105] many medicines listed by Beers are not available in Australia; and that some medicines considered inappropriate in Australia are not listed by Beers.[106] Disagreement between Beers and other criteria, such as the improving prescribing in the elderly tool (IPET), have been identified.[109]



1  
2  
3 The Beers criteria was recently updated,[22] with approximately half the medicines listed  
4 being unavailable in Australia. Further, almost three quarters of the diseases or syndromes  
5 listed are not among the forty problems most frequently managed in patients over sixty five  
6 years of age by Australian general practitioners.[97] Beers still contains recommendations to  
7 avoid some medicines that are recommended for certain older people in Australia such as  
8 amiodarone, and it has recently been shown that rhythm control in older patients with atrial  
9 fibrillation may be more effective than rate control in reducing mortality over the long-  
10 term.[110]. Reviews of explicit and implicit criteria have identified these and other problems  
11 such as; failure to address drug-drug interactions and drug duplication, errors in  
12 recommendations, underrepresentation of certain drug categories, inclusion of infrequently  
13 prescribed drugs, criteria that are inapplicable for all situations, disagreement between  
14 criteria, and lack of organisation of criteria.[45 ,102 ,111]  
15  
16  
17  
18

19  
20 This has resulted in the development by others of criteria more suited to their own particular  
21 healthcare environment.[112 ,113] Nationally based criteria have been described as the most  
22 desirable type of criteria, as they do not necessitate adaptation to local guidelines or national  
23 formularies before they can be used with confidence. [32]In 2008 we therefore sought to  
24 construct and validate a set of prescribing appropriateness criteria relevant to the Australian  
25 healthcare environment. Our development process differed from most other tools[21 ,108  
26 ,112-117] as it did not initially involve a consensus panel, which has now been addressed.  
27 This development process also resulted in criteria unavailable in other tools such as  
28 monitoring, underprescribing, need for additional tests, evaluation of smoking and  
29 vaccination status, and certain drug interactions[32 ,45 ,102] Because we have generally  
30 named drug classes rather than specific drugs (Table 3), and targeted common medical  
31 conditions found in older patients,[118 ,119] we anticipate that our work may have some  
32 international usefulness.  
33  
34  
35  
36

37  
38 Despite a desire in Australia to develop decision support tools to improve healthcare  
39 quality,[120] progress has consisted of the development of a limited number of non-age  
40 specific structure and process indicator lists for use in hospitals and general practice.[40 ,121-  
41 123] Many of these lists require updating. [32 ,113 ,124] Currently, there is no Australian  
42 prescribing appropriateness criteria list to assist in improving medication management in  
43 older people. The usefulness of such an approach has been acknowledged, together with other  
44 approaches such as medication review.[125]  
45  
46  
47

### 48 **Co-morbidity**

49 Over 80% of older Australians have three or more chronic conditions,[96] with Australian  
50 general practitioners shown to be dealing more frequently with patients presenting with three  
51 or four problems in the year 2009-10 compared with 2000-01.[126] Co-morbidity is  
52 associated with poor quality of life, physical disability, high health care use, multiple  
53 medicines with consequent increased risk of adverse drug events, fragmentation of care, and  
54 increased mortality.[119 ,127] Yet most Australian guidelines for chronic diseases do not  
55 modify or discuss the applicability of their recommendations to older patients with multiple  
56 comorbid conditions. [34] This situation is not restricted to Australia.[127 ,128]Because the  
57  
58  
59  
60



1  
2  
3 risk of harm in older patients increases in proportion to the number of treatments prescribed,  
4 prioritization of therapeutic goals is necessary. For example, coronary heart disease (CHD) is  
5 an important morbidity in Australia[77 ,96] for which treatment with ACE inhibitors or  
6 angiotensin 2 antagonists has been recommended to reduce the risk of cardiovascular  
7 events.[70 ,71] Other criteria derived outside Australia such as STOPP/START do not  
8 include this recommendation. [21] However, the presence of co-morbidity in CHD  
9 (commonly arthritis or respiratory disease) or other clinical factors (such as dizziness, falls or  
10 patient preference) may mean that medicines such as these are never commenced, due to  
11 consideration of other factors. While we wished to identify problems such as these, the  
12 ultimate decision regarding medicine use should always be made on a case by case basis  
13 based on clinical experience, a discussion between the health care professional and the  
14 patient, and best available evidence. [72] Issues such as these may run counter to  
15 recommendations of disease-specific, evidence-based guidelines.[34] . Addition of our  
16 criteria with this associated usage information (Table 4) to the implicit processes of  
17 Australian medication review may assist in addressing the problem of co-morbidity.  
18  
19  
20  
21  
22

### 23 **The Oldest Old**

24  
25  
26 Knowledge about the state of health and function of the oldest old is limited,[129] with  
27 research on their drug use being scarce, and often based on small and selected samples  
28 without comparison with other age groups.[130 ,131] We know that older patients in general  
29 are underrepresented in clinical trials, so that disease-specific guideline recommendations  
30 based on evidence may not apply to older cohorts.[34] For example, undertreatment with  
31 anti-osteoporotic medicines has been identified as a significant evidence-practice gap in  
32 Australia.[98] While STOPP/START criteria recommend calcium and vitamin D  
33 supplements,[21] no recommendations for more specific medicines are made. Further,  
34 evidence available for fracture risk reduction has been reported to differ with age.[90]).  
35 Similarly, blood pressure targets appropriate for older patients may not be appropriate for the  
36 oldest old,[50] with adverse effects for antihypertensives found to be among the most  
37 frequent in centenarians.[132]Issues regarding the oldest old appear in table 4, criteria 1, 2, 9,  
38 18, and 39. We have attempted to achieve the advantages of using mostly explicit criteria,  
39 such as ease of application, with the addition of application information (Tables 2 and 4)  
40 unavailable in our previous criteria set.  
41  
42  
43  
44  
45

### 46 **Rationale for the use of the RAND/UCLA appropriateness method**

47 The RAND/UCLA appropriateness method has been used to rate lists ranging up to over  
48 3000 indications, where panellists have been asked to use the clinical literature and their best  
49 clinical judgement to assess the appropriateness of performing a procedure. To do this, they  
50 have rated various clinical scenarios.[46]While the number and type of our criteria may differ  
51 to this, similar criteria have been developed using the RAND/UCLA method. For example, in  
52 the development of indicators for patients undergoing total hip or total knee replacement, one  
53 of the 68 indicators stated that for such patients, “deep venous thrombosis prophylaxis should  
54 be provided for a minimum of two weeks after hospital discharge”. [43] In the development of  
55 indicators for hazardous prescribing for GPs using this method, one of the 34 indicators  
56  
57  
58  
59  
60

1  
2  
3 identified the hazardous use of “NSAID in a patient with heart failure”.<sup>[44]</sup> We therefore  
4 followed a similar protocol.  
5  
6

### 7 **The nature of decision support tools**

8 Panel members emphasized that criteria may not provide definitive answers, instead  
9 indicating potential problems that might need addressing, due to a perceived unacceptable  
10 variation in care.<sup>[133]</sup> While performance indicators are designed to measure the result of  
11 statements made in clinical practice guidelines, these guidelines often provide  
12 recommendations for care independent of other considerations such as multiple co-  
13 morbidities, advanced age, frailty, patient preferences, disease burden or limited life  
14 expectancy.<sup>[134-136]</sup> In such cases, less stringent goals, deprescribing or non-prescription  
15 may be more appropriate.<sup>[15,81,137]</sup> For example, a frail older patient with multiple co-  
16 morbidities and one or more functional impairments may have a life expectancy of  
17 approximately two years or less.<sup>[75]</sup> This raises the question of whether failure to intensify  
18 treatment<sup>[81]</sup> or to underuse evidence-based therapies<sup>[138]</sup> reflects appropriate clinical  
19 judgement or an inappropriate care gap. The panel felt strongly that use of indicators,  
20 guidelines or criteria providing clinical decision support should never replace critical thinking  
21 in patient care.<sup>[139]</sup>  
22  
23  
24  
25  
26  
27

### 28 **Strengths and weaknesses**

29 We have followed a recommended approach <sup>[120]</sup> by suggesting criteria for which high  
30 quality evidence exists linking best practice with improved outcomes; where there are  
31 established evidence-practice gaps<sup>[98,99]</sup>; and where the health conditions impose the  
32 greatest burden on the healthcare system. We used a validated consensus method, an expert  
33 panel of varied specialization, and criteria written with the aim of conciseness and clarity.  
34  
35  
36

37 In addition to face and content validity, these validated criteria, much like performance  
38 indicators, will require further developmental work to provide evidence of their acceptability,  
39 operational feasibility, reliability, and degree of predictive validity.<sup>[35,133]</sup> Some of this  
40 work has already commenced with the original criteria.<sup>[95]</sup> Further, these criteria only cover  
41 commonly occurring medicines and medical conditions. In addition, judgements made by an  
42 expert panel may not be representative of all health care professionals.  
43  
44  
45

### 46 **Intended use**

47 These validated criteria are intended for use by health care providers to enhance the quality of  
48 the Australian medication review process, for quality improvement, educational purposes and  
49 internal audit. They are also intended for external quality assessment, such as use by policy  
50 makers and for public reporting. Stakeholder involvement will be critical to facilitate local  
51 uptake and encourage further research into the effects on health outcomes.<sup>[125]</sup>  
52  
53  
54

### 55 **CONCLUSION**

56  
57  
58  
59  
60

1  
2  
3 This study validated 41 prescribing appropriateness criteria to assist in identifying DRPs in  
4 older ( $\geq 65$  years) Australians. These criteria are intended to represent an addition to the  
5 medication management skill set that includes consideration of limited life expectancy,  
6 evidence base in the oldest old, drug burden and care coordination, patient and care-giver  
7 education, empowerment for self management, and shared decision making. These skills are  
8 far from a “do everything for everyone” philosophy, where aggressive treatment may  
9 encourage more care, not more appropriate care.[31 ,135] Despite the presence of clinical  
10 decision support tools, health care providers need to know how to think about clinical  
11 problems, not just what to think.[139]  
12  
13  
14

15  
16 **Competing interests** None declared  
17

18 **Contributors** BJB designed and organised the study, analysed and interpreted the data and  
19 drafted the manuscript. TFC and RJM made substantial contributions to the conception,  
20 design, analysis and interpretation of the data, and to critically revising the draft. All authors  
21 take responsibility for the accuracy and integrity of the study. All authors have given final  
22 approval of the version to be published.  
23  
24

25  
26 **Funding** This research received no specific grant from any funding agency in the public,  
27 commercial or not-for-profit sectors  
28  
29

30 **Data sharing statement** No additional data are available  
31

## 32 REFERENCES

33  
34  
35  
36

- 37 1 Kwint H-F, Faber A, Gussekloo J, *et al.* Effects of Medication Review on Drug-  
38 Related Problems in Patients Using Automated Drug-Dispensing Systems. *Drugs*  
39 *& Aging* 2011;28(4):305-14.
- 40 2 Ellitt GR, Engblom E, Aslani P, *et al.* Drug related problems after discharge  
41 from an Australian teaching hospital. *Pharm World Sci* 2010;32(5):622-30.
- 42 3 Nishtala PS, McLachlan AJ, Bell JS, *et al.* A retrospective study of drug-related  
43 problems in Australian aged care homes: medication reviews involving  
44 pharmacists and general practitioners *Journal of Evaluation in Clinical Practice*  
45 2011;17(1):97-103.
- 46 4 Stafford AC, Tenni PC, Peterson GM, *et al.* Drug-related problems identified in  
47 medication reviews by Australian pharmacists. *Pharm World Sci* 2009;31:216-23.
- 48 5 Hilmer SN, Gnjjidic D. The effects of polypharmacy in older adults. *Clin*  
49 *Pharmacol Ther* 2009;85:86-88.
- 50 6 Pirmohamed M, James S, Meakin S, *et al.* Adverse drug reactions as cause of  
51 admission to hospital: prospective analysis of 18 820 patients. *BMJ*  
52 2004;329(7456):15-19.
- 53 7 Kongkaew C, Noyce PR, Ashcroft DM. Hospital admissions associated with  
54 adverse drug reactions: A systematic review of prospective observational studies.  
55 *Ann Pharmacother* 2008;42:1017-25.  
56  
57  
58  
59  
60

- 1  
2  
3 8 Castelino RL, Chen TF, Guddattu V, *et al.* Use of evidence-based therapy for  
4 the prevention of cardiovascular events among older people *Eval Health Prof*  
5 2010;33(3):276-301.
- 6 9 Heeley EL, Peiris DP, Patel AA, *et al.* Cardiovascular risk perception and  
7 evidence-practice gaps in Australian general practice (the AusHEART study).  
8 *MJA* 2010;192(5):254-59.
- 9 10 National Institute of Clinical Studies, Australian Government. Evidence-  
10 practice gaps report, vol. 1. A review of developments 2004-2007. 2008.  
11 [http://www.nhmrc.gov.au/nics/materials-and-resources/evidence-practice-gaps-](http://www.nhmrc.gov.au/nics/materials-and-resources/evidence-practice-gaps-report-volume-one-review-developments-2004-2007)  
12 [report-volume-one-review-developments-2004-2007](http://www.nhmrc.gov.au/nics/materials-and-resources/evidence-practice-gaps-report-volume-one-review-developments-2004-2007) (accessed 18 July 2012)
- 13 11 Gilbert AL, Roughead EE, Beilby J, *et al.* Collaborative medication  
14 management services: improving patient care. *MJA* 2002;177:189-92.
- 15 12 Elliott RA, Martinac G, Campbell S, *et al.* Pharmacist-led medication review to  
16 identify medication-related problems in older people referred to an aged care  
17 assessment team. A randomiized comparative study. *Drugs & Aging*  
18 2012;29(7):593-605.
- 19 13 Kaur S, Mitchell G, Vitetta L, *et al.* Interventions that can reduce inappropriate  
20 prescribing in the elderly. *Drugs Aging* 2009;26(12):1013-28.
- 21 14 Tulner LR, van Campen JPCM, Frankfort SV, *et al.* Changes in under-  
22 treatment after comprehensive geriatric assessment. An observational study.  
23 *Drugs & Aging* 2010;27(10):831-43.
- 24 15 Le Couteur DG, Banks E, Gnjudic D, *et al.* Deprescribing. *Aust Presc*  
25 2011;34:182-5.
- 26 16 Garfinkel D, Mangin D. Feasibility study of a systemic approach for  
27 discontinuation of multiple medications in older adults. *Arch Intern Med*  
28 2010;170(18):1648-54.
- 29 17 Gill JM, Mainous AG, Koopman RJ, *et al.* Impact of EHR-based clinical  
30 decision support on adherence to guidelines for patients on NSAID's: a  
31 randomised controlled trial. *Ann Fam Med* 2011;9:22-30.
- 32 18 O'Connor PJ, Sperl-Hillen JM, Rush WA, *et al.* Impact of electronic health  
33 record clinical decision support on diabetes care; a randomised trial. *Ann Fam*  
34 *Med* 2011;9:12-21.
- 35 19 Chang C-B, Chan D-C. Comparison of published explicit criteria for potentially  
36 inappropriate medications in older adults. *Drugs & Aging* 2010;27(12):947-57.
- 37 20 Scott I, Jayathissa S. Quality of drug prescribing in older patients: is there a  
38 problem and can we improve it? *Intern Med J* 2010;40:7-18.
- 39 21 Gallagher P, Ryan C, Byrne S, *et al.* STOPP (screening tool of older person's  
40 prescriptions) and START (screening tool to alert doctors to right treatment).  
41 Consensus validation. *International Journal of Clinical Pharmacology and*  
42 *Therapeutics* 2008;46(2):72-83.
- 43 22 American Geriatrics Society updated Beers criteria for potentially  
44 inappropriate medication use in older adults. The American Geriatrics Society  
45 2012 Beers Criteria update expert panel. *J Am Geriatr Soc* 2012;60:616-31.
- 46 23 Medicare Australia [homepage on the internet]. Australian Government. Home  
47 Medicines Review. [http://www.medicareaustralia.gov.au/provider/pbs/fourth-](http://www.medicareaustralia.gov.au/provider/pbs/fourth-agreement/hmr.jsp)  
48 [agreement/hmr.jsp](http://www.medicareaustralia.gov.au/provider/pbs/fourth-agreement/hmr.jsp). (accessed 17 July 2012).
- 49 24 Guidelines for pharmacists providing Residential Medication Management  
50 Review (RMMR) and Quality Use of Medicines (QUM) services. Pharmaceutical  
51  
52  
53  
54  
55  
56  
57  
58  
59  
60

- 1  
2  
3 Society of Australia 2011. [www.psa.org.au/download/practice-guidelines/rmmr-and-gum-services.pdf](http://www.psa.org.au/download/practice-guidelines/rmmr-and-gum-services.pdf) (accessed 17 Aug 2012).
- 4  
5 25 Basger BJ, Chen TF, Moles RJ. Inappropriate Medication Use and Prescribing  
6 Indicators in Elderly Australians. *Drugs Aging* 2008;25(9):777-93.
- 7  
8 26 Chang C-B, Chen J-H, Wen C-J, *et al.* Potentially inappropriate medications in  
9 geriatric outpatients with polypharmacy: application of six sets of published  
10 explicit criteria. *Br J Clin Pharmacol* 2011;72(3):482-89.
- 11  
12 27 Laroche ML, Charmes JP, Bouthier JP, *et al.* Inappropriate medications in the  
13 elderly. *Clin Pharmacol Ther* 2009;85(1):94-7.
- 14  
15 28 Maio V, Jutkowitz E, Herrera K, *et al.* Appropriate medication prescribing in  
16 elderly patients: how knowledgeable are primary care physicians? A survey  
17 study in Parma, Italy. *J Clin Pharm Ther* 2011;36:468-80.
- 18  
19 29 Resnick B, Pacala JT. 2012 Beers criteria. *J Am Geriatr Soc* 2012;60:612-13.
- 20  
21 30 Fried TR, Tinetti ME, Iannone MA. Primary care clinicians experiences with  
22 treatment decision making for older persons with multiple conditions. *Arch  
23 Intern Med* 2011;171(1):75-80.
- 24  
25 31 Hayward RA. Performance measurement in search of a path. *N Eng J Med*  
26 2007;356(9):951-52.
- 27  
28 32 Dimitrow MS, Airaksinen MSA, Kivela S-L, *et al.* Comparison of prescribing  
29 criteria to evaluate the appropriateness of drug treatment in individuals aged 65  
30 and older: A systematic review. *J Am Geriatr Soc* 2011;59(8):1521-30.
- 31  
32 33 Mangin D, Sweeney K, Heath I. Preventative health care in elderly people needs  
33 rethinking. *BMJ* 2007;335:285-87.
- 34  
35 34 Scott IA, Guyatt GH. Cautionary tales in the interpretation of clinical studies  
36 involving older persons. *Arch Intern Med* 2010;170(7):587-95.
- 37  
38 35 Martirosyan L, Voorham J, Haaijer-Ruskamp FM, *et al.* A systematic literature  
39 review : prescribing indicators related to type 2 diabetes mellitus and  
40 cardiovascular risk management. *Pharmacoepidemiol Drug Saf* 2010;19:319-34.
- 41  
42 36 Bettering the evaluation and care of health (BEACH). Family Medicine  
43 Research Centre. The University of Sydney.  
44 <http://sydney.edu.au/medicine/fmrc/beach/> (accessed 18 July 2012)
- 45  
46 37 Access to Pharmaceutical Services. *Pharmaceutical Benefits Scheme. Department  
47 of Health and Ageing. Australian Government.*  
48 [http://www.health.gov.au/internet/budget/publishing.nsf/Content/2010-11\\_Health\\_PBS\\_sup1/\\$File/Outcome%20%20-%20Access%20to%20Pharmaceutical%20Services.pdf](http://www.health.gov.au/internet/budget/publishing.nsf/Content/2010-11_Health_PBS_sup1/$File/Outcome%20%20-%20Access%20to%20Pharmaceutical%20Services.pdf). (accessed 10 July 2012).
- 49  
50 38 *eTG complete [CD-ROM]. Melbourne (VIC): Therapeutic Guidelines, 2011 Nov*
- 51  
52 39 *Rossi S (Editor), Australian Medicines Handbook 2012 (CD-ROM). Adelaide:  
53 Australian Medicines Handbook Pty Ltd; 2012*
- 54  
55 40 NSW Therapeutic Advisory Group. Indicators for Quality Use of Medicines in  
56 Australian Hospitals 2007  
57 <http://www.ciap.health.nsw.gov.au/nswtag/documents/publications/QUMIndicators/Manual0408.pdf> (accessed 18 July 2012).
- 58  
59 41 Fitch K, Bernstein SJ, Aguilar MS, *et al.* The RAND/UCLA Appropriateness  
60 Method User's Manual 2001. Rand Corporation.  
[www.rand.org/pubs/monograph\\_reports/MR1269.html](http://www.rand.org/pubs/monograph_reports/MR1269.html) (accessed 18 July 2012)
- 42  
43 McGory ML, Kao KK, Shekelle PG, *et al.* Developing quality indicators for  
44 elderly surgical patients. *Ann Surg* 2009;250:338-47.



- 1  
2  
3 43 SooHoo NF, Lieberman JR, Farnig E, *et al.* Development of quality of care  
4 indicators for patients undergoing total hip or total knee replacement. *Qual Saf*  
5 2011;20:153-57.
- 6 44 Avery AJ, Dex GM, Mulvaney C, *et al.* Development of prescribing-safety  
7 indicators for GPs using the RAND appropriateness method. *Brit J Gen Pract*  
8 2011;61:526-36.
- 9 45 Levy HB, Marcus E-L, Christen C. Beyond the Beers criteria: a comparative  
10 overview of explicit criteria *Ann Pharmacother* 2010;44:1968-75.
- 11 46 Shekelle PG. Appropriateness criteria: a useful tool for the cardiologist. *Heart*  
12 2009;95(7):517-20.
- 13 47 Hypertension and target blood pressure. National Prescribing Service.  
14 Indicators of quality prescribing in Australian general practice. A Manual for  
15 Users [online]. Available from URL:  
16 [http://www.nps.org.au/  
17 data/assets/pdf\\_file/0019/37351/indicators\\_full.pdf](http://www.nps.org.au/data/assets/pdf_file/0019/37351/indicators_full.pdf)  
18 (accessed 18 July 2012)
- 19  
20  
21 48 Heart Foundation Guide to management of hypertension 2008. Updated  
22 December 2010.  
23 <http://www.heartfoundation.org.au/SiteCollectionDocuments/HypertensionGuidelines2008to2010Update.pdf> (accessed 18 July 2012).
- 24  
25 49 *Australian Medicines Handbook Drug Choice Companion: Aged Care. 3rd edn.*  
26 *Adelaide: Australian Medicines Handbook Pty Ltd; 2010.*
- 27 50 Charpentier MM, Bundeff MM. Treating hypertension in the very elderly. *Ann*  
28 *Pharmacother* 2011;45:1138-45.
- 29 51 Gribbin J, Hubbard R, Gladman JRF, *et al.* Risk of falls associated with  
30 antihypertensive medication; population-based case control study. *Age Ageing*  
31 2010;39:592-97.
- 32 52 Tinetti ME, Kumar C. The patient who falls. *JAMA* 2010;303(3):258-66.
- 33 53 Therapeutics Initiative. Do statins have a role in primary prevention? An  
34 update. Therapeutics letter. March-April 2010; 77: 1-5.  
35 <http://www.ti.ubc.ca/sites/ti.ubc.ca/files/77.pdf> (accessed 18 July 2012).
- 36  
37 54 Ray KK, Seshasai SRK, Erqou S, *et al.* Statins and all-cause mortality in high-  
38 risk primary prevention. A meta-analysis of 11 randomised controlled trials  
39 involving 65,229 participants. *Arch Intern Med* 2010;170(12):1024-31.
- 40 55 deLorgeril M, Salen P, Abramson J, *et al.* Cholesterol lowering, cardiovascular  
41 diseases, and the rosuvastatin-JUPITER controversy. A critical reappraisal.  
42 *Arch Intern Med* 2010;170(12):1032-36.
- 43 56 Petersen LK, Christensen K, Kragstrup J. Lipid-lowering treatment to the end?  
44 A review of observational studies and RCTs on cholesterol and mortality in 80+  
45 year olds. *Age Ageing* 2010;39:674-80.
- 46 57 Robinson JG. Lipid-lowering therapy for the primary prevention of  
47 cardiovascular disease in the elderly. Opportunities and challenges. *Drugs Aging*  
48 2009;26(11):917-31.
- 49 58 Krum H, Jelinek M, Stewart S, *et al.* 2011 Update to National Heart Foundation  
50 of Australia and Cardiac Society of Australia and New Zealand guidelines for  
51 the prevention, detection and management of chronic heart failure in Australia,  
52 2006 *MJA* 2011;194(8):405-09.
- 53 59 Krum H, Teerlink JR. Medical therapy for chronic heart failure. *Lancet*  
54 2011;378:713-21.
- 55  
56  
57  
58  
59  
60



- 1  
2  
3 60 Huang D, Cheng JWM. Pharmacologic management of heart failure with  
4 preserved ejection fraction. *Ann Pharmacother* 2010;44:1933-45.  
5 61 Management of diastolic heart failure [revised 2008 June]. In: eTG complete  
6 [CD-ROM]. Melbourne: Therapeutic Guidelines Limited; 2011 Nov.  
7 62 Huang N, Duggan K, Harman J. Lifestyle management of hypertension. *Aust*  
8 *Presc* 2008;31:150-53.  
9 63 Stokes GS. Management of hypertension in the elderly patient. *Clinical*  
10 *Interventions in Aging* 2009;4:379-89.  
11 64 Bajorek BV, Krass I, Ogle SJ, *et al.* Optimizing the use of antithrombotic  
12 therapy for atrial fibrillation in older people: A pharmacist-led multidisciplinary  
13 intervention. *J Am Geriatr Soc* 2005;53:1912-20.  
14 65 De Caterina R, Hylek EM. Stroke prevention in atrial fibrillation: current status  
15 and near-future directions. *Am J Med* 2011;124:793-99.  
16 66 Gillett RG, Norrell A. Considerations for safe use of statins: liver enzyme  
17 abnormalities and muscle toxicity. *Am Fam Physician* 2011;83(6):711-16.  
18 67 Thomas JE, Tershakovec AM, Jones-Burton C, *et al.* Lipid lowering for  
19 secondary prevention of cardiovascular disease in older adults. *Drugs Aging*  
20 2010;27(12):959-72.  
21 68 Perrotta C, Aznar M, Mejia R, *et al.* Oestrogens for preventing recurrent  
22 urinary tract infection in postmenopausal women. *Cochrane Database of*  
23 *Systematic Reviews* 2008, Issue 2. Art. No.: CD005131. DOI:  
24 [10.1002/14651858.CD005131.pub2](https://doi.org/10.1002/14651858.CD005131.pub2). 2008.  
25 69 Treatment of hypothyroidism [revised 2009 June]. In: eTG complete [CD-  
26 ROM]. Melbourne: Therapeutic Guidelines Limited; 2011 July.  
27  
28 70 Reducing Risk in Heart Disease 2007. A summary guide for preventing  
29 cardiovascular events in people with coronary heart disease. Updated 2008.  
30 National Heart Foundation of Australia and the Cardiac Society of Australia and  
31 New Zealand. [http://www.heartfoundation.org.au/information-for-](http://www.heartfoundation.org.au/information-for-professionals/Clinical-Information/Pages/coronary-heart-disease.aspx)  
32 [professionals/Clinical-Information/Pages/coronary-heart-disease.aspx](http://www.heartfoundation.org.au/information-for-professionals/Clinical-Information/Pages/coronary-heart-disease.aspx) (accessed  
33 12 July 2012).  
34 71 Volpe M. Should all patients at high cardiovascular risk receive renin-  
35 angiotensin system blockers? *Q J Med* 2012;105:11-27.  
36 72 Boyd CM, Leff B, Wolff JL, *et al.* Informing clinical practice guideline  
37 development and implementation: prevalence of coexisting conditions among  
38 adults with coronary heart disease. *J Am Geriatr Soc* 2011;59:797-805.  
39 73 Heart Foundation. Guide to management of Hypertension 2008 updated 2010  
40 [online].  
41 [http://www.heartfoundation.org.au/SiteCollectionDocuments/HypertensionGuid-](http://www.heartfoundation.org.au/SiteCollectionDocuments/HypertensionGuidelines2008to2010Update.pdf)  
42 [elines2008to2010Update.pdf](http://www.heartfoundation.org.au/SiteCollectionDocuments/HypertensionGuidelines2008to2010Update.pdf) [accessed 18 July 2012].  
43 74 Guidelines for the assessment of absolute cardiovascular disease risk.  
44 [http://www.heartfoundation.org.au/SiteCollectionDocuments/guidelines-](http://www.heartfoundation.org.au/SiteCollectionDocuments/guidelines-Absolute-risk.pdf)  
45 [Absolute-risk.pdf](http://www.heartfoundation.org.au/SiteCollectionDocuments/guidelines-Absolute-risk.pdf) (accessed 18 July 2012).  
46 75 Holmes HM. Rational prescribing for patients with a reduced life expectancy.  
47 *Clin Pharmacol Ther* 2009;85(1):103-7.  
48 76 Improving treatment of systolic heart failure. NPS News 75, 2011. National  
49 Prescribing Service Limited.  
50 [http://www.nps.org.au/ data/assets/pdf file/0006/132495/News75\\_heart\\_failure](http://www.nps.org.au/data/assets/pdf_file/0006/132495/News75_heart_failure_1011v2.pdf)  
51 [1011v2.pdf](http://www.nps.org.au/data/assets/pdf_file/0006/132495/News75_heart_failure_1011v2.pdf) (accessed 18 July 2012).  
52  
53  
54  
55  
56  
57  
58  
59  
60

- 1  
2  
3 77 Caughey GE, Roughead EE, Shakib S, *et al.* Co-morbidity and potential  
4 treatment conflicts in elderly heart failure patients. *Drugs Aging* 2011;28(7):575-  
5 81.  
6 78 Lip GYH, Halperin JL. Improving stroke risk stratification in atrial fibrillation.  
7 *Am J Med* 2010;123:484-88.  
8 79 Hughes M, Lip GYH. Risk factors for anticoagulation-related bleeding  
9 complications in patients with atrial fibrillation: a systematic review. *Q J Med*  
10 2007;100:599-607.  
11 80 Statins and muscle disorders - be careful with the dose. Australian Adverse  
12 Drug Reactions Bulletin 2008; 27 (3). <http://www.tga.gov.au/pdf/aadrb-0806.pdf>  
13 (accessed 18 July 2012)  
14 81 LeChauncy WD, Landrum CR, Urech TH, *et al.* Treating chronically ill people  
15 with diabetes mellitus with limited life expectancy: Implications for performance  
16 measurement. *J Am Geriatr Soc* 2012;DOI: 10.1111/j.1532-5415.2011.03784.x:1-  
17 9.  
18 82 Lee SJ, Boscardin WJ, Cenzer IS, *et al.* The risks and benefits of implementing  
19 glycemic control guidelines in frail older adults with diabetes mellitus. *J Am*  
20 *Geriatr Soc* 2011;59:666-72.  
21 83 Joint Formulary Committee. British National Formulary (online) London: BMJ  
22 Group and Pharmaceutical Press <<http://www.medicinescomplete.com>>  
23 [Accessed on 18 July 2012].  
24 84 Analgesic choices in persistent pain. Prescribing Practice Review 2006; 35.  
25 National Prescribing Service Limited  
26 [http://www.nps.org.au/\\_data/assets/pdf\\_file/0017/23750/ppr35\\_analgesics\\_0906.](http://www.nps.org.au/_data/assets/pdf_file/0017/23750/ppr35_analgesics_0906.pdf)  
27 [pdf](http://www.nps.org.au/_data/assets/pdf_file/0017/23750/ppr35_analgesics_0906.pdf) (accessed 18 July 2012).  
28 85 Hill KD, Wee R. Psychotropic drug-induced falls in older people. A review of  
29 interventions aimed at reducing the problem. *Drugs Aging* 2012;29(1):15-30.  
30 86 Zeimer H. Medications and falls in older people. *Journal of Pharmacy Practice*  
31 *and Research* 2008;38(2):148-51.  
32 87 Caughey GE, Roughead EE, Shakib S, *et al.* Comorbidity of chronic disease and  
33 potential treatment conflicts in older people dispensed antidepressants. *Age*  
34 *Ageing* 2010;39:488-94.  
35 88 Proton pump inhibitors. NPS News 46, 2006. National Prescribing Service  
36 Limited.  
37 [http://www.nps.org.au/\\_data/assets/pdf\\_file/0016/23821/news46\\_gord\\_ppis\\_060](http://www.nps.org.au/_data/assets/pdf_file/0016/23821/news46_gord_ppis_0606.pdf)  
38 [6.pdf](http://www.nps.org.au/_data/assets/pdf_file/0016/23821/news46_gord_ppis_0606.pdf) (accessed 18 July 2012).  
39 89 National Asthma Council Australia. Asthma Management Handbook 2006.  
40 National Asthma Council Australia, Melbourne, 2006  
41 [http://www.nationalasthma.org.au/uploads/handbook/370-amh2006\\_web\\_5.pdf](http://www.nationalasthma.org.au/uploads/handbook/370-amh2006_web_5.pdf)  
42 (accessed 18 July 2012).  
43 90 Inderjeeth CA, Poland KE. Management of osteoporosis in older people. *J*  
44 *Pharm Pract Res* 2010;40:229-34.  
45 91 Reducing fracture risk in osteoporosis. NPS News 73, 2011. National Prescribing  
46 Service Limited.  
47 [http://www.nps.org.au/\\_data/assets/pdf\\_file/0014/126401/News73\\_osteoporosis](http://www.nps.org.au/_data/assets/pdf_file/0014/126401/News73_osteoporosis_0511.pdf)  
48 [0511.pdf](http://www.nps.org.au/_data/assets/pdf_file/0014/126401/News73_osteoporosis_0511.pdf) (accessed 18 July 2012).  
49 92 Gates BJ, Sonnett TE, DuVall CAK, *et al.* Review of osteoporosis  
50 pharmacotherapy for geriatric patients. *Am J Geriatr Pharmacother* 2009;7:293-  
51 323.  
52  
53  
54  
55  
56  
57  
58  
59  
60

- 1  
2  
3 93 Cheung AM, Detsky AS. Osteoporosis and fractures - Missing the bridge?  
4 *JAMA* 2008;299(12):1468-70.
- 5 94 Commonwealth of Australia. The National Strategy for Quality Use of  
6 Medicines Plain English Edition [online]. Available from URL:  
7 <http://www.health.gov.au/internet/main/Publishing.nsf/Content/CA777524C860>  
8 [DFF2CA256F1800468B61/\\$File/natstrateng.pdf](http://www.health.gov.au/internet/main/Publishing.nsf/Content/CA777524C860) [accessed 18 July 2012]
- 9 95 Basger BJ, Chen TF, Moles RJ. Application of a prescribing indicators tool to  
10 assist in identifying drug-related problems in a cohort of older Australians. *Int J*  
11 *Pharm Pract* 2012;20(3):172-82.
- 12 96 Caughey GE, Vitry AI, Gilbert AL, *et al.* Prevalence of comorbidity of chronic  
13 diseases in Australia. *BMC Public Health* 2008.  
14 <http://www.biomedcentral.com/1471-2458/8/221>. (accessed 18 July 2012).
- 15 97 Top 40 most frequently managed problems: Patients aged 65+. Personal  
16 communication, unpublished data from the BEACH Program, Family Medicine  
17 Research Centre, University of Sydney, November 2011.  
18 <http://sydney.edu.au/medicine/fmrc/beach/index.php> (accessed 10 July 2012).
- 19 98 Evidence-practice gaps report. vol. 2. National Institute of Clinical Studies.  
20 Australian Government 2005.  
21 [http://www.nhmrc.gov.au/nics/material\\_resources/resources/evidence\\_volume\\_2](http://www.nhmrc.gov.au/nics/material_resources/resources/evidence_volume_2)  
22 [wo.htm](http://www.nhmrc.gov.au/nics/material_resources/resources/evidence_volume_2). (accessed 12 July 2012)
- 23 99 Evidence-practice gaps report. Vol. 1. National Institute of Clinical Studies,  
24 Australian Government 2003.  
25 [http://www.nhmrc.gov.au/nics/material\\_resources/resources/evidence\\_volume\\_1](http://www.nhmrc.gov.au/nics/material_resources/resources/evidence_volume_1)  
26 [ne.htm](http://www.nhmrc.gov.au/nics/material_resources/resources/evidence_volume_1). (accessed 17 July 2012).
- 27 100 Evidence-Practice Gaps Report Volume 1. A review of developments: 2004-  
28 2007. National Institute of Clinical Studies. Australian Government.  
29 [http://www.nhmrc.gov.au/nics/materials-and-resources/evidence-practice-gaps-](http://www.nhmrc.gov.au/nics/materials-and-resources/evidence-practice-gaps-report-volume-one-review-developments-2004-2007)  
30 [report-volume-one-review-developments-2004-2007](http://www.nhmrc.gov.au/nics/materials-and-resources/evidence-practice-gaps-report-volume-one-review-developments-2004-2007) (accessed 17 July 2012).
- 31 101 Bajorek BV, Ren S. Utilisation of antithrombotic therapy for stroke prevention  
32 in atrial fibrillation in a Sydney hospital: then and now. *Int J Clin Pharm*  
33 2012;34:88-97.
- 34 102 O'Connor MN, Gallagher P, O'Mahony D. Inappropriate prescribing. Criteria,  
35 detection and prevention. *Drugs Aging* 2012;29(6):437-52.
- 36 103 Castelino RL, Bajorek BV, Chen TF. Retrospective evaluation of home medicine  
37 review by pharmacists in older Australian Patients using the Medication  
38 Appropriateness Index. *Ann Pharmacother* 2010;44:1922-29.
- 39 104 King MA, Roberts MS. The influence of the Pharmaceutical Benefits Scheme  
40 (PBS) on inappropriate prescribing in Australian nursing homes. *Pharmacy*  
41 *World & Science* 2007;29:39-42.
- 42 105 Stafford AC, Alswayan MS, Tenni PC. Inappropriate prescribing in older  
43 residents of Australian care homes. *J Clin Pharm Ther* 2011;36:33-44.
- 44 106 Widagdo IS, Nyfort-Hansen K, Kowalski SR. Prevalence of potentially  
45 inappropriate medication use in elderly hospitalised patients. *J Pharm Pract Res*  
46 2011;41:122-25.
- 47 107 Roughead EE, Anderson B, Gilbert AL. Potentially inappropriate prescribing  
48 among Australian veterans and war widows/widowers. *Internal Medicine Journal*  
49 2007;37:402-05.
- 50 108 Fick DM, Cooper JW, Wade WE, *et al.* Updating the Beers criteria for  
51 potentially inappropriate medication use in older adults: results of a US  
52 consensus panel of experts. *Archives of Internal Medicine* 2003;163(22):2716-24.
- 53  
54  
55  
56  
57  
58  
59  
60

- 1  
2  
3 109 Ryan C, O'Mahony D, Kennedy J, *et al.* Appropriate prescribing in the elderly:  
4 an investigation of two screening tools, Beers criteria considering diagnosis and  
5 independent of diagnosis and improving prescribing in the elderly tool to identify  
6 inappropriate use of medicines in the elderly in primary care in Ireland. *J Clin*  
7 *Pharm Ther* 2009;34:369-76.
- 8 110 Ionescu-Ittu R, Abrahamowicz M, Jackevicius CA, *et al.* Comparative  
9 effectiveness of rhythm control vs rate control drug treatment effect on mortality  
10 in patients with atrial fibrillation. *Arch Intern Med* 2012;172(13):997-1004.
- 11 111 Page RL, Linnebur SA, Bryant LL, *et al.* Inappropriate prescribing in the  
12 hospitalised elderly patient: Defining the problem, evaluation tools, and possible  
13 solutions. *Clin Interv Aging* 2010;5:75-87.
- 14 112 Holt S, Schmiedl S, Thurmann PA. Potentially inappropriate medications in the  
15 elderly: The PRISCUS list. *Deutsches Arzteblatt International* 2010;107(31-  
16 32):543-51.
- 17 113 Laroche ML, Charmes JP, Merle L. Potentially inappropriate medications in  
18 the elderly: a French consensus panel list. *European Journal of Clinical*  
19 *Pharmacology* 2007;63:725-31.
- 20 114 Beers MH. Explicit criteria for determining potentially inappropriate  
21 medication use by the elderly. An update. *Archives of Internal Medicine*  
22 1997;157(14):1531-6.
- 23 115 Beers MH, Ouslander JG, Rollinger I, *et al.* Explicit criteria for determining  
24 inappropriate medication use in nursing home residents. UCLA Division of  
25 Geriatric Medicine. *Archives of Internal Medicine* 1991;151(9):1825-32.
- 26 116 McLeod PJ, Huang AR, Tamblyn RM, *et al.* Defining inappropriate practices in  
27 prescribing for elderly people: a national consensus panel. *CMAJ*  
28 1997;156(3):385-91.
- 29 117 Zhan C, Sangl J, Bierman AS, *et al.* Potentially inappropriate medication use in  
30 the community-dwelling elderly: findings from the 1996 Medical Expenditure  
31 Panel Survey. *JAMA* 2001;286(22):2823-9.
- 32 118 Starfield B, Lemke KW, Herbert R, *et al.* Comorbidity and the use of primary  
33 care and specialist care in the elderly. *Ann Fam Med* 2005;3:215-22.
- 34 119 Barnett K, Mercer SW, Norbury M, *et al.* Epidemiology of multimorbidity and  
35 implications for health care, research, and medical education: a cross-sectional  
36 study. *Lancet* 2012;380:37-43.
- 37 120 Evans SM, Lowinger JS, Sprivulis PC, *et al.* Prioritizing quality indicator  
38 development across the healthcare system: identifying what to measure. *Intern*  
39 *Med J* 2009;39:648-54.
- 40 121 Elliott RA, Woodward MC, Osborne CA. Indicators of prescribing quality for  
41 elderly hospital inpatients. *Aust J Hosp Pharm* 2001;31:19-25.
- 42 122 National Prescribing Service. Indicators of quality prescribing in Australian  
43 general practice 2006. A Manual for Users.  
44 [http://www.nps.org.au/data/assets/pdf\\_file/0019/37351/indicators\\_full.pdf](http://www.nps.org.au/data/assets/pdf_file/0019/37351/indicators_full.pdf)  
45 (accessed 18 July 2012).
- 46 123 A proposed set of clinical indicators for stakeholder comment by 30 July 2012.  
47 RACGP clinical improvement unit practice, policy and innovation department.  
48 The Royal Australian College of General Practitioners.  
49 [http://www.racgp.org.au/Content/NavigationMenu/ClinicalResources/Clinicalin](http://www.racgp.org.au/Content/NavigationMenu/ClinicalResources/Clinicalindicators/2012ClinicalIndicators_ConsultationPaper.pdf)  
50 [dicators/2012ClinicalIndicators\\_ConsultationPaper.pdf](http://www.racgp.org.au/Content/NavigationMenu/ClinicalResources/Clinicalindicators/2012ClinicalIndicators_ConsultationPaper.pdf) (accessed 16 July 2012).  
51  
52  
53  
54  
55  
56  
57  
58  
59  
60

- 1  
2  
3 124 Morris CJ, Cantrill JA, Hepler CD, *et al.* Preventing drug-related morbidity--  
4 determining valid indicators. *International Journal for Quality in Health Care*  
5 2002;14(3):183-98.
- 6 125 Bell JS, Le Couteur DG, McLachlan AJ, *et al.* Improving medicine selection for  
7 older people. Do we need an Australian classification for inappropriate  
8 medicines use? *Aust Fam Physician* 2012;41:9-10.
- 9 126 Britt H, Miller GC, Charles J, *et al.* General practice activity in Australia 2000-1  
10 to 2009-10: 10 year data tables. General practice series no. 28. Cat. no. GEP 28.  
11 Canberra: AIHW. [http://www.aihw.gov.au/publication-](http://www.aihw.gov.au/publication-detail/?id=6442472440&tab=2)  
12 [detail/?id=6442472440&tab=2](http://www.aihw.gov.au/publication-detail/?id=6442472440&tab=2) (accessed 17 July 2012). 2010.
- 13 127 Boyd CM, Darer J, Boulton C, *et al.* Clinical practice guidelines and quality of care  
14 for older patients with multiple comorbid diseases. *JAMA* 2005;294:716-24.
- 15 128 Kamerow D. How can we treat multiple chronic conditions? *BMJ*  
16 2012;344:e1487 doi: 10.136/bmj.e87
- 17  
18  
19 129 Richmond RL, Law J, Kay-Lambkin F. Physical, mental, and cognitive function  
20 in a convenience sample of centenarians in Australia. *J Am Geriatr Soc*  
21 2011;59:1080-86.
- 22 130 Wastesson JW, Parker MG, Fastbom J, *et al.* Drug use in centenarians  
23 compared with nonagenarians and octogenarians in Sweden: a nationwide  
24 register-based study. *Age and Ageing* 2012;41:218-24.
- 25 131 Watts G. Why the exclusion of older people from clinical research must stop.  
26 *BMJ* 2012;344:e3445.
- 27 132 Frada G, Bennati E, Cardillo E, *et al.* Pharmacotherapy in the extreme  
28 longevity. *Arch Gerontol Geriatr* 2009;49:60-63.
- 29 133 Campbell SM, Braspenning J, Hutchinson A, *et al.* Research methods used in  
30 developing and applying quality indicators in primary care. *Qual Saf Health*  
31 *Care* 2002;11:358-64.
- 32 134 Vitry AI, Zhang Y. Quality of Australian clinical guidelines and relevance to the  
33 care of older people with multiple comorbid conditions. *Med J Aust*  
34 2008;189:360-65.
- 35 135 Lee SJ, Walter LC. Quality indicators for older adults. Preventing unintended  
36 harms. *JAMA* 2011;306(13):1481-82.
- 37 136 Gilbert AL, Caughey GE, Vitry AI, *et al.* Ageing well: Improving the  
38 management of patients with multiple chronic health problems. *Australas J*  
39 *Ageing* 2011;30(S2):32-37.
- 40 137 Gnjdic D, Hilmer SN, Blyth FM, *et al.* High-risk prescribing and incidence of  
41 frailty among older community-dwelling men. *Clin Pharmacol Ther*  
42 2012;91(3):521-28.
- 43 138 Sirois C, Moisan J, Poirier P, *et al.* Association between age and the initiation of  
44 antihypertensive, lipid lowering and antiplatelet medications in elderly  
45 individuals newly treated with antidiabetic drugs. *Age Ageing* 2009;38:741-45.
- 46 139 Powers JH. Practice guidelines. Belief, criticism, and probability. *Arch Intern*  
47 *Med* 2011;171(1):15-16.
- 48  
49  
50  
51  
52  
53  
54  
55  
56  
57  
58  
59  
60



## Validation of prescribing appropriateness criteria for older Australians using the RAND/UCLA Appropriateness Method

### ARTICLE SUMMARY

#### Article focus

- Drug-related problems (DRPs) are common in older people. They may result in drug treatment goals not being achieved and/or resulting in under-treatment with proven medicine, and disproportionately high numbers the occurrence of adverse drug events
- The aim of this study was to further develop and validate a previously published list of prescribing appropriateness criteria for use in older people which may be used to improve the quality of the Australian medication review process, and for quality assessment and education in medicine use

#### Key messages

- The use of medication assessment criteria is one method to assist in identifying DRPs. Criteria developed elsewhere may have little or no applicability to the Australian healthcare environment
- Validation of proposed Australian prescribing appropriateness criteria for older people was accomplished using a two-round modified Delphi method, resulting in agreement for all criteria as measured by median panel ratings, and the amount of dispersion of panel ratings, based on the interpercentile range
- Use of these criteria, together with other Australian medication review processes, may assist in improving patient care in a variety of settings by efficiently identifying DRPs to common medical conditions and commonly used medicines. They may also contribute to the medication management knowledge of health care professionals through education programs and by use in daily practice, and for the evaluation of the quality of pharmaceutical care in older people

#### Strengths and limitations

- A validated consensus method was used involving an expert medication management panel of varied specialisation. Criteria were based on established evidence-practice gaps and degree of disease burden imposed on the health care system, and were written with the aim of conciseness and clarity
- Further developmental work is required to assess the usefulness of these criteria, which only included commonly occurring medicines and medical conditions

### ABSTRACT

**Objective:** To update further develop and validate previously published proposed national prescribing appropriateness criteria to assist in identifying drug-related problems (DRPs) ~~to~~ for commonly occurring medications and medical conditions in older ( $\geq 65$  years old) Australians.

**Design:** Rand/UCLA Appropriateness Method



1  
2  
3 **Participants:** A panel of medication management experts were identified consisting of  
4 geriatricians/pharmacologists, clinical pharmacists, and disease management advisors to  
5 organisations that produce Australian evidence-based therapeutic publications. This resulted  
6 in a round one panel of fifteen members, and a round two panel of twelve members

7  
8 **Main outcome measure:** Agreement on all criteria

9 **Results:** Forty eight prescribing criteria were rated. In the first rating round via email, there  
10 was disagreement regarding 17 of the criteria according to median panel ratings. During a  
11 face-to-face second round meeting, discussion resulted in retention of 25 criteria after  
12 amendments, 39 of the proposed criteria being accepted, with 25 of 48 criteria requiring  
13 amendment or updating. Fourteen were unchanged, agreement for 14 criteria with no changes  
14 required, and and 9 criteria deleted deletion of 9 criteria. Two new criteria were added,  
15 resulting in a final validated list of 41 prescribing appropriateness criteria. Agreement after  
16 round two was reached for all 41 criteria, measured by median panel ratings and the amount  
17 of dispersion of panel ratings, based on the interpercentile range

18  
19  
20  
21  
22 ~~After round one, there was agreement on the appropriateness of 31 of the 48 criteria, and~~  
23 ~~disagreement for 17 criteria. Discussion at round two resulted in retention of 10 criteria for~~  
24 ~~which there had been disagreement after round one, acceptance of 14 of the original criteria~~  
25 ~~with no change, deletion of nine criteria, and addition of two new criteria,~~

26  
27  
28 **Conclusions:** A set of 41 Australian prescribing appropriateness criteria were validated by an  
29 expert panel. Use of these criteria, together with clinical judgement and other medication  
30 review processes such as patient interview, is intended to assist in improving patient care by  
31 efficiently detecting potential DRPs related to commonly occurring medicines and medical  
32 conditions in older Australians. These criteria may also contribute to the medication  
33 management education of health care professionals

## 34 INTRODUCTION

35  
36  
37  
38 Drug-related problems (DRPs) in older people ( $\geq 65$  years old) are common, [1-4] They may  
39 result in drug treatment goals not being achieved and/or resulting in both undertreatment with  
40 proven medicines {Castelino, 2010 #183; Heeley, 2010 #137, #161} and disproportionately  
41 high numbers of serious adverse medication events due to polypharmacy. [5-7] DRPs can  
42 occur for many reasons such as undertreatment, {Castelino, 2010 #183; Heeley, 2010 #137, #161}  
43 inadequate monitoring of medicines, poor medicine or dose selection, duplication of  
44 medicines, or factors to do with the way the patient uses the medicine. [2, 3, 8-12] Methods  
45 to identify and reduce DRPs include health care professional directed educational  
46 interventions, [13] comprehensive geriatric assessment, [14] discontinuation of multiple  
47 medications, [15, 16] electronic health record clinical decision support targeted towards  
48 certain diseases or drugs, [17, 18] and the use of medication assessment criteria, which  
49 usually consist of explicit (that is, criterion-based rather than implicit or judgement-based)  
50 lists of prescribing recommendations for various drugs and/or disease states [13, 19-22]

1  
2  
3 However in older patients, the importance of traditional outcomes, such as discrete clinical  
4 events or mortality, may be secondary to maintaining physical and cognitive function or relief  
5 of symptoms. {Fried, 2011 #301} Because of this, optimal care requires clinical decision  
6 support tools that consider issues such as patient preferences, frailty, cost, and co-  
7 morbidities. {Hayward, 2007 #302} Additionally, few criteria target the oldest old {Dimitrow,  
8 2011 #242} (generally regarded as people older than 85 years), where evidence may be poor,  
9 and preventive interventions may be encouraged in patients who have already exceeded an  
10 average lifespan. {Mangin, 2007 #253; Scott, 2010 #305}

11  
12  
13  
14 In Australia, issues such as these identification and resolution of DRPs are intended to be  
15 considered when patients are interviewed by an accredited pharmacist as part of the Home  
16 Medicines Review program.[23] This program aims to provide the sophistication lacking in  
17 the application of explicit (that is, criterion based rather than implicit or judgement based)  
18 measures alone, as it takes into account other issues such as the patients history and personal  
19 preferences, such as our criteria list, {Basger, 2008 #132} and is targeted towards patients  
20 who may be (among other reasons) currently taking  $\geq 5$  regular medicines, attending a  
21 number of different doctors, or have recently been discharged from hospital.[24]

22  
23  
24  
25  
26 In 2008, we proposed a list of 48 prescribing appropriateness criteria (45 explicit and three  
27 implicit) aimed at improving detection of DRPs as part of the Australian medication review  
28 process. {Basger, 2008 #132} When applied to a cohort of older Australians, a high incidence  
29 of undertreatment and use of inappropriate medicines was detected. {Basger, 2012 #296} It  
30 was also intended that our criteria have application in other areas, as criteria derived outside  
31 Australia have been applied in a variety of settings such as community, nursing home and  
32 hospital, {Chang, 2010 #209} and have been applied using a variety of study designs such as  
33 in retrospective cross-sectional studies, randomized controlled trials, and in retrospective and  
34 prospective case series. {Kaur, 2009 #156} They have been used in daily clinical  
35 practice; {Laroche, 2009 #151} in the evaluation of health plans {Laroche, 2009 #151} and in  
36 the evaluation of knowledge of appropriate prescribing; {Maio, 2011 #362} in the training of  
37 health care professionals; {Resnick, 2012 #356} to evaluate nursing home adherence to  
38 medicine related regulations; {Resnick, 2012 #356} and to develop healthcare quality  
39 indicators. {Chang, 2011 #364}

40  
41  
42  
43  
44  
45 In 2008, we proposed a list of 48 prescribing appropriateness criteria (45 explicit and three  
46 implicit) aimed at improving detection of DRPs as part of the Australian medication review  
47 process.[25] These criteria were intended to be applied alongside the patient interview in  
48 order to prompt appropriate history taking, particularly with respect to commonly occurring  
49 medical conditions and medicines. Similar criteria derived outside Australia have been found  
50 to have application in a variety of settings and for a variety of uses, such as in the training of  
51 health care professionals and in the evaluation of the quality of health care.[19 ,26-29] Our  
52 criteria were based on the most frequent medicines prescribed to Australians, and the most  
53 frequent medical conditions for which older Australians ( $\geq 65$  years old) consult medical  
54 practitioners. Australian medication and disease state resources and guidelines were used to

provide content validity. [25] However, unlike our criteria, other prescribing criteria or tools have combined evidence with expert opinion to provide face validity.

~~The appropriateness of health care delivery in Australia for common conditions, such as atrial fibrillation and osteoarthritis, has been shown to be poor. {Runciman, 2012 #359} Our criteria were based on the most frequent medicines prescribed to Australians, and the most frequent medical conditions for which older Australians ( $\geq 65$  years old) consult medical practitioners. Australian medication and disease state resources and guidelines were used to provide content validity. {Basger, 2008 #132} However, unlike our criteria, other prescribing criteria or tools have combined evidence with expert opinion to provide face validity. {Martirosyan, 2010 #303; Levy, 2010 #304}~~

The aim of this study was to further develop our list of criteria, supplementing it with recommendations for co-morbidity and the oldest old where possible, and adding new criteria where necessary through expert consensus. In older patients, the importance of traditional outcomes, such as discrete clinical events or mortality, may be secondary to maintaining physical or cognitive function or relief of symptoms. [30] Because of this, optimal care requires clinical decision support tools that consider issues such as patient preferences, frailty, cost and co-morbidities. [31] Additionally, few criteria target the oldest old [32] (generally regarded as people older than 85 years), where evidence may be poor, and preventive interventions may be encouraged in patients who have already exceeded an average lifespan. [33, 34]

To further develop and validate our criteria list, we identified a panel of medication management experts, and chose the RAND/UCLA appropriateness method, which has been described as the best method for systematically combining recommendations from clinical guidelines, with the opinion of healthcare providers. [35]

~~{Fried, 2011 #301} {Hayward, 2007 #302} {Dimitrow, 2011 #242} {Mangin, 2007 #253; Scott, 2010 #305} {Basger, 2008 #132} {Chang, 2010 #209; Laroche, 2009 #151; Maio, 2011 #362; Resnick, 2012 #356; Chang, 2011 #364} The aim of this study was to update our list of criteria. We wished to add missing recommendations for co-morbidity and for the oldest old where possible, and to validate the criteria through expert consensus. To do this, we identified a panel of medication management experts, and chose the RAND/UCLA appropriateness method, {Fitch, #244} which has been described as the best method for systematically combining recommendations from clinical guidelines, with the opinion of healthcare providers. {Martirosyan, 2008 #300}~~

## METHODS

### Ethics

Ethics approval was obtained from the Human Research Ethics Committee of the University of Sydney.

### Criteria development

In 2008, we ~~found~~ identified the -50 highest-volume Australian Pharmaceutical Benefits Scheme (PBS) -medicines prescribed,- and the forty most common reasons for older Australians to seek or receive healthcare. Healthcare information was obtained using the BEACH (Bettering The Evaluation and Care of Health) program, which continuously collects information about the clinical activities in general practice in Australia.[36] We then used Australian medication information sources to identify both optimal and inappropriate medication management of these common conditions.[25] In Australia, medication availability and use is largely determined by the PBS.[37] In October 2011, commonly used medications and medical conditions were checked and updated using the BEACH program to ensure that criteria content was current. Changes in evidence, product information, Australian consensus documents, evidence-based publication recommendations or clinical practice guidelines relating to our criteria were noted for evaluation by an expert medication management panel. The criteria were designed to provide guidance on the process of care wherever it occurred – community, hospital, -residential home, care home or nursing home. Major considerations in their development were ~~potential~~ likely accessibility of data- from the patient, their medical notes and/or their health care professional(s), conciseness and clarity of wording, and provision of a practical number of criteria. Most were explicit to enable consistent application, with additional notes provided for interpretation where necessary. They were written as a statement of the kind of medication management that should or should not occur, to simplify comprehension and facilitate uptake.[25]

### Validation of criteria - participants

We recruited -a multidisciplinary group of medication management experts to review, update and rate the criteria, consisting of -geriatrician/pharmacologists, clinical pharmacists, and disease management advisors to organisations that produce Australian evidence-based therapeutic publications. This resulted in a round one panel of fifteen members. The geriatricians consisted of two professors of geriatric medicine; an associate professor of clinical pharmacology and aged care; a research fellow in geriatric medicine; and a hospital staff geriatrician. Clinical pharmacists consisted of a residential medication management review pharmacist; a home medicines review pharmacist; four hospital-based pharmacists (two team leaders, one director and one education and training pharmacist), and a professor of aged care (Pharmacy). Disease management advisors to Australian evidence-based therapeutic organisations consisted of Therapeutic Guidelines,[38] Australian Medicines Handbook,[39] and the New South Wales Therapeutic Advisory Group.[40]

### Choice of the RAND/UCLA appropriateness method

We chose the RAND/UCLA appropriateness method, a two-round modified Delphi method[41] to select the most appropriate criteria. Unlike the Delphi method, which generally involves multiple questionnaire-driven rounds to obtain convergence of opinion, the RAND method involves an initial individual rating round, and a second face-to-face round. This method has been shown to produce results that have face, construct and predictive

1  
2  
3 validity.[42 ,43] Systematically combining available evidence with expert opinion can create  
4 quality criteria where best evidence may be lacking.[44]  
5  
6

7 While most lists of prescribing criteria are based on expert consensus, this has often been  
8 achieved through mail surveys rather than face-to-face meetings.[32 ,35 ,45] Although face-  
9 to-face meetings restrict panel size, they allow discussion to resolve misinterpretations,  
10 introduce new evidence, and improve clarity of criteria between rating rounds. We ensured  
11 our panel comprised different specialities, as less disagreement has been found among same-  
12 speciality panels.[46] We addressed concern regarding potential intimidation due to dominant  
13 panel personalities by choosing a moderator experienced in the development of these criteria  
14 and in facilitating small group discussion. This may also have assisted with conflict-of-  
15 interest issues. We used both the median panel rating and the amount of dispersion of panel  
16 ratings to identify agreement or disagreement. While it has been acknowledged that  
17 discrepancies between these two methods may occur,[41]our aim was to achieve agreement  
18 for all accepted criteria for both methods after second round discussion.  
19  
20  
21  
22

### 23 **RAND/UCLA appropriateness method**

24 ~~The RAND/UCLA appropriateness method has been used to rate lists ranging up to over~~  
25 ~~3000 indications, where panellists have been asked to use the clinical literature and their best~~  
26 ~~clinical judgement to assess the appropriateness of performing a procedure. To do this, they~~  
27 ~~have rated various clinical scenarios. {Shekelle, 2009 #318} While the number and type of our~~  
28 ~~criteria may differ to this, similar criteria have been developed using the RAND/UCLA~~  
29 ~~method. For example, in the development of indicators for patients undergoing total hip or~~  
30 ~~total knee replacement, one of the 68 indicators stated that for such patients, “deep venous~~  
31 ~~thrombosis prophylaxis should be provided for a minimum of two weeks after hospital~~  
32 ~~discharge”. {SooHoo, 2011 #316} In the development of indicators for hazardous prescribing~~  
33 ~~for GPs using this method, one of the 34 indicators identified the hazardous use of “NSAID~~  
34 ~~in a patient with heart failure”. {Avery, 2011 #317} We therefore followed a similar protocol.~~  
35  
36  
37  
38

### 39 **RAND/UCLA Appropriateness Method round one**

40 In October 2011 candidate panel members were emailed an explanation of the project and an  
41 invitation to participate. After acceptance, they were emailed a rating sheet consisting of 48  
42 criteria, and asked to rate each on a nine point scale. Ratings of 1-3 were classified as  
43 inappropriate, with a rating of one indicating the greatest degree of inappropriateness. Ratings  
44 of 7-9 were classified as appropriate, with a rating of nine indicating the greatest degree of  
45 appropriateness. Ratings of 4-6 were classified as neither appropriate nor inappropriate.  
46 Appropriate was defined as “the expected health benefit exceeds the expected negative  
47 consequences by a sufficiently wide margin that criteria are worth following, exclusive of  
48 cost”. They also received a description of the way in which the criteria had been derived, and  
49 a comparison with other prescribing criteria.[25 ,32] Panel members were requested to amend  
50 the wording or delete, update or identify missing criteria as required. Upon return of the  
51 rating sheets, results were tabulated. Agreement was based on four or less panellists rating  
52 outside the three-point region containing the median (1-3; 4-6; 7-9), and disagreement was  
53 based on five or more panellists rating in each extreme (1-3 and 7-9), as per the  
54 RAND/UCLA protocol for a fifteen member panel.[41] ~~Additionally, the 30th and 70th~~  
55  
56  
57  
58  
59  
60



percentiles adjusted for symmetry were computed for each of the criteria, as it has been found that when ratings were symmetric with respect to the middle (five on the 1-9 scale), the interpercentile range (IPR) required to label an indication as disagreement was smaller than when they were asymmetric with respect to the middle (values far from five on the 1-9 scale). Agreement occurred when the interpercentile range adjusted for symmetry (IPRAS) was greater than the IPR {Fitch, #244}

### Rand/UCLA Appropriateness Method round two

In November 2011, a face-to-face meeting of the expert panel, chaired by a panel moderator experienced in facilitating group discussions and criteria development, met to discuss the results of round one and re-rate each of the criteria and any potential additional criteria. One pharmacist, one staff geriatrician and a disease management advisor for a therapeutics publication could not attend, resulting in a twelve member panel. For this meeting, each panel member was provided with a copy of the results from round one. This consisted of the frequency distribution of ratings of all panellists across the 9-point scale, the overall panel median rating for each of the criteria and, for each panellist, an annotation of how they had rated each of the criteria. Scores from other panel members were not revealed. Depending upon panellists votes, panel agreement or disagreement was also stated for each of the round one criteria. Additionally, the 30th and 70th percentiles adjusted for symmetry were computed for each of the criteria, as it has been found that when ratings were symmetric with respect to the middle (five on the 1-9 scale), the interpercentile range (IPR) required to label an indication as disagreement was smaller than when they were asymmetric with respect to the middle (values far from five on the 1-9 scale). Agreement after round two occurred when the interpercentile range adjusted for symmetry (IPRAS) was greater than the IPR.[41]

We used the median method to present data at the face-to-face meeting, as it provided a clear visual interpretation of the ratings for each criterion. By the end of the meeting, our aim was to ensure that there was agreement between the median method and the interpercentile method for all accepted criteria.

Discussion at round two occurred on the level of agreement for each of the criteria. In addition, discussion was facilitated on the wording of each of the criteria to improve clarity and decide whether agreement would be reached. The definitions of agreement and disagreement were adjusted for the smaller second round twelve member panel.[41] Agreement was reached when three or less panel members voted outside the 3-point region containing the median, or when the IPRAS was greater than the IPR. Disagreement was determined when four or more panellists rated in each extreme (1-3 and 7-9). Each of the criteria were then discussed; irrespective of whether there was agreement or disagreement, with panellists having the opportunity of changing their ratings if, for example, misinterpretation had occurred because of the way in which the criteria had been written, or if new evidence had become available, or if criteria had been interpreted in the light of a panellists own clinical experience. Each panel member consented to audio recording of the discussion. Values for the median, IPR and IPRAS ~~were computed~~:[41] were computed using SPSS version 20 (SPSS, Chicago, IL, USA).



### Data analysis

Median values, IPR and IPRAS were computed using SPSS version 20 (SPSS, Chicago, IL, USA). Audio recordings were transcribed.

## RESULTS

After round one, there was agreement ~~on~~ for the appropriateness of 31 of the 48 criteria, and disagreement for 17 criteria. ~~Discussion at round two resulted in retention of 10 criteria for which there had been disagreement after round one, acceptance of 14 of the original criteria with no change, deletion of nine criteria, and addition of two new criteria, resulting in 41 validated criteria. Of the 31 criteria for which there was agreement, discussion at round two resulted in 17 criteria being amended and retained, 2 criteria being deleted, and 12 criteria accepted with no change. Of the 17 criteria for which there was disagreement, discussion at round two resulted in 8 criteria being amended and retained, 7 criteria being deleted, and 2 criteria accepted with no change. Two new criteria were added, resulting in a total of 41 validated criteria.~~

An example of how the RAND/UCLA method was applied to each of our criteria is described in Table 1 for ~~criteria~~ one. The larger the IPRAS, the less asymmetric are the ratings. For example, thirteen of fifteen panellists at round one rated indicator fourteen with a score of eight or nine, for which the IPRAS was 8.35.

Table 2 lists the median panel ratings, the amount of dispersion of panel ratings, and whether there was agreement or disagreement for the original criteria and the validated criteria. It also lists the amendments made by the panel to the original criteria, and the reasons for these amendments. There was 100% agreement for both median panel ratings and dispersion of panel ratings for the validated criteria. Table 3 contains the final list of validated criteria, arranged according to disease states. Table 4 lists usage information judged to be necessary for certain criteria.

Table 1 An example of the application of the RAND/UCLA appropriateness method to one ~~criteria~~ indicator criterion (one) from round one

| Nine point scale where 1-3 = inappropriate, 4-6 = | Number of panellists rating this | Calculations, interpercentile range method[41] | Interpretation |
|---------------------------------------------------|----------------------------------|------------------------------------------------|----------------|
|                                                   |                                  |                                                |                |

| neither appropriate nor inappropriate, 7-9 = appropriate | criterion (n=15) |                                                                                                                                                                                                                                                                            |                                                                                                                                                    |
|----------------------------------------------------------|------------------|----------------------------------------------------------------------------------------------------------------------------------------------------------------------------------------------------------------------------------------------------------------------------|----------------------------------------------------------------------------------------------------------------------------------------------------|
| 1                                                        |                  | 30 <sup>th</sup> percentile = <b>7.0</b>                                                                                                                                                                                                                                   | This criterion was accepted according to the median method because four or less panellists voted outside the 3 point region containing the median. |
| 2                                                        |                  | 70 <sup>th</sup> percentile = <b>8.0</b>                                                                                                                                                                                                                                   |                                                                                                                                                    |
| 3                                                        | 1                | Interpercentile range (IPR) =                                                                                                                                                                                                                                              |                                                                                                                                                    |
| 4                                                        |                  | 70 <sup>th</sup> minus 30 <sup>th</sup> percentile) =                                                                                                                                                                                                                      |                                                                                                                                                    |
| 5                                                        | 1                | <b>1.0</b> Interpercentile range                                                                                                                                                                                                                                           |                                                                                                                                                    |
| 6                                                        | 1                | central point (IPRCP) = 30 <sup>th</sup>                                                                                                                                                                                                                                   |                                                                                                                                                    |
| 7                                                        | 5                | + 70 <sup>th</sup> percentile divided by 2                                                                                                                                                                                                                                 |                                                                                                                                                    |
| 8                                                        | 5                | = <b>7.5</b>                                                                                                                                                                                                                                                               |                                                                                                                                                    |
| 9                                                        | 2                | Asymmetry index (AI) = [5                                                                                                                                                                                                                                                  |                                                                                                                                                    |
|                                                          | median = 7.0     | minus IPRCP] (as an absolute value) = <b>2.5</b><br>Interpercentile range adjusted for symmetry (IPRAS) = [2.5 plus (AI x 1.5)] = <b>6.1</b> , where 2.5 is the IPR required for disagreement when perfect symmetry exists, and 1.5 is the correction factor for asymmetry | The IPRAS (6.1) was greater than the IPR (1.0) indicating no disagreement. The larger the IPRAS, the less asymmetric the ratings.                  |

Table 2 Changes made to original criteria according to agreement, disagreement and panel discussion

| Criteria Number | Original prescribing appropriateness criteria for older (≥65 years) Australians <a href="#">published in 2008</a> [25] | Rating by median method[41] (median value, A= agreement, D= disagreement), n=15 |   | Rating by IPRAS <sup>1</sup> method[41] (IPR value, IPRAS value, A = agreement, D = disagreement), n=15 |   | Validated prescribing appropriateness criteria for older (≥65 years) Australians <a href="#">as a result of this study</a> | Rating by median method[41] (median value, A= agreement, D= disagreement), n=12 |   | Rating by IPRAS <sup>1</sup> method[41] (IPR value, IPRAS value, A = agreement, D = disagreement), n=12 |   | Amendment/reason                                                                                                                                                                                                                          |
|-----------------|------------------------------------------------------------------------------------------------------------------------|---------------------------------------------------------------------------------|---|---------------------------------------------------------------------------------------------------------|---|----------------------------------------------------------------------------------------------------------------------------|---------------------------------------------------------------------------------|---|---------------------------------------------------------------------------------------------------------|---|-------------------------------------------------------------------------------------------------------------------------------------------------------------------------------------------------------------------------------------------|
|                 |                                                                                                                        |                                                                                 |   |                                                                                                         |   |                                                                                                                            |                                                                                 |   |                                                                                                         |   |                                                                                                                                                                                                                                           |
| 1.              | Patient taking an antihypertensive is at their target blood pressure                                                   | 7                                                                               | A | 1.00, 6.10                                                                                              | A | Patient taking an antihypertensive is at the target blood pressure appropriate for them                                    | 8                                                                               | A | 1.10, 7.52                                                                                              | A | “Appropriate for them” added. Current blood pressure guidelines may not be appropriate for all older patients[47-49]. For example, in the oldest old[50]; in palliative care; and for those who are/become hypotensive and/or fall[51,52] |
| 2.              | Patient at high risk of a cardiovascular event is taking a statin                                                      | 7                                                                               | A | 1.00, 6.10                                                                                              | A | Patient at high risk of a recurrent cardiovascular event is taking a statin                                                | 8                                                                               | A | 1.00, 6.10                                                                                              | A | “Recurrent” added to ensure use in secondary prevention of cardiovascular events rather than primary prevention, where evidence is less clear, especially in the oldest old[33,53-57]                                                     |
| 3.              | Patient with IHD or a history of MI is taking a beta blocker                                                           | 8                                                                               | A | 2.00, 6.85                                                                                              | A | Patient with CHD or a history of MI is taking a beta blocker                                                               | 7                                                                               | A | 1.00, 6.10                                                                                              | A | “CHD” replaced “IHD”. The term “coronary heart disease” is preferred over “ischemic heart disease”                                                                                                                                        |
| 4.              | Patient with IHD or a history of MI is taking an antiplatelet agent unless on an oral anticoagulant                    | 8                                                                               | A | 1.00, 7.60                                                                                              | A | Patient with CHD or a history of MI is taking an antiplatelet agent unless on an oral anticoagulant                        | 8                                                                               | A | 1.00, 7.60                                                                                              | A | “CHD” replaced “IHD”. The term “coronary heart disease” is preferred over “ischemic heart disease”                                                                                                                                        |
| 5               | Patient with heart failure is taking a beta blocker                                                                    | 7                                                                               | A | 1.00, 6.10                                                                                              | A | Patient with stable heart failure with left systolic ventricular dysfunction (HF-                                          | 8                                                                               | A | 0.10, 6.78                                                                                              | A | Description of heart failure amended. The use of beta blockers is contra-indicated in                                                                                                                                                     |

|     |                                                                                                                    |   |   |               |   |                                                                                                                        |   |   |               |   |                                                                                                                                                            |
|-----|--------------------------------------------------------------------------------------------------------------------|---|---|---------------|---|------------------------------------------------------------------------------------------------------------------------|---|---|---------------|---|------------------------------------------------------------------------------------------------------------------------------------------------------------|
|     |                                                                                                                    |   |   |               |   | LVSD) is taking a beta blocker                                                                                         |   |   |               |   | unstable heart failure. The optimal treatment of heart failure with preserved ejection fraction (HFPEF) is uncertain at this time[58 ,59]                  |
| 6.  | Patient with heart failure is taking an ACEI or A2A                                                                | 8 | A | 2.00<br>6.85  | A | Patient with stable heart failure with left systolic ventricular dysfunction (HF-LVSD) is taking an ACEI or A2A        | 9 | A | 1.00,<br>7.60 | A | Description of heart failure amended. The optimal treatment of heart failure with preserved ejection fraction (HFPEF) is uncertain at this time[58 ,59]    |
| 7.  | Patient with heart failure is NOT taking medications which may exacerbate heart failure                            | 9 | A | 1.00,<br>7.60 | A | Patient with HF-LVSD or HFPEF is NOT taking medications which may exacerbate heart failure                             | 9 | A | 0.10,<br>8.27 | A | Description of heart failure amended. The types of medicines contraindicated in HF-LVSD and HFPEF may not be identical[60 ,61]                             |
| 8   | Patient with heart failure or hypertension is NOT taking high sodium medications                                   | 8 | D | 2.20,<br>5.50 | A | Deleted                                                                                                                | - |   | -             | - | High sodium medicines (among others) in heart failure are addressed by indicator 7. In hypertension, they are addressed as lifestyle modifications[62 ,63] |
| 9.  | Patient with AF is taking an oral anticoagulant                                                                    | 7 | D | 2.0,<br>5.35  | A | Patient with AF is taking an oral anticoagulant or an antiplatelet agent, depending upon stroke risk and bleeding risk | 8 | A | 0.10,<br>6.93 | A | An antiplatelet agent may be appropriate for patients at low risk of stroke. Bleeding risk may determine choice of antithrombotic agent[49 ,64 ,65]        |
| 10. | Patient with AF taking an anticoagulant has an INR between 2 – 3                                                   | 8 | A | 2.20,<br>6.70 | A | Patient taking warfarin for AF has an INR between 2-3                                                                  | 9 | A | 1.00,<br>7.60 | A | New anticoagulants like rivaroxaban and dabigatran do not require INR monitoring                                                                           |
| 11. | Patient with a history of non-hemorrhagic stroke or TIA is taking an antiplatelet agent unless on an anticoagulant | 8 | A | 1.00,<br>7.60 | A | Patient with a history of non-hemorrhagic stroke or TIA is taking an antiplatelet agent unless on an anticoagulant     | 9 | A | 1.00,<br>7.60 | A | No change                                                                                                                                                  |
| 12. | Patient with risk factors for myopathy is NOT taking                                                               | 7 | D | 3.00,<br>4.60 | A | Patient with risk factors for statin induced myopathy is                                                               | 8 | A | 1.10,<br>7.52 | A | The use of all high dose high potency statins together with                                                                                                |

|     |                                                                                                                         |   |   |            |   |                                                                                                                                           |   |   |            |   |                                                                                                                                                                                                                                          |
|-----|-------------------------------------------------------------------------------------------------------------------------|---|---|------------|---|-------------------------------------------------------------------------------------------------------------------------------------------|---|---|------------|---|------------------------------------------------------------------------------------------------------------------------------------------------------------------------------------------------------------------------------------------|
|     | 40mg or more per day of simvastatin or atorvastatin                                                                     |   |   |            |   | not taking a high dose of a high potency statin                                                                                           |   |   |            |   | risk factors may increase the likelihood of myopathy[49 ,66 ,67]                                                                                                                                                                         |
| 13. | Patient with cardiovascular disease is NOT taking an NSAID                                                              | 7 | A | 1.20, 5.95 | A | Patient with cardiovascular disease is NOT taking an NSAID                                                                                | 8 | A | 1.10, 6.18 | A | No change                                                                                                                                                                                                                                |
| 14. | Patient with cardiovascular, respiratory disease or diabetes who smokes has been offered smoking cessation therapy      | 9 | A | 0.00, 8.35 | A | Patient with cardiovascular, respiratory disease or diabetes who smokes has been offered smoking cessation options                        | 9 | A | 0.00, 8.35 | A | “Therapy” implies pharmacotherapy, whereas repeated counselling/psychotherapy may be preferred to avoid the risks associated with polypharmacy                                                                                           |
| 15. | Patient with type 2 diabetes and hypertension and albuminuria is taking an ACEI or A2A                                  | 8 | A | 2.00, 6.85 | A | Patient with type 2 diabetes and hypertension and albuminuria is taking an ACEI or A2A                                                    | 9 | A | 1.00, 7.60 | A | No change.                                                                                                                                                                                                                               |
| 16. | Patient with diabetes at high risk of a cardiovascular event is taking an antiplatelet agent unless on an anticoagulant | 7 | D | 2.20, 5.50 | A | Patient with diabetes at high risk of a cardiovascular event is taking an antiplatelet agent unless on an anticoagulant                   | 9 | A | 1.00, 7.60 | A | No change                                                                                                                                                                                                                                |
| 17. | Patient with diabetes is NOT taking a medication which may increase or decrease blood glucose concentrations            | 5 | D | 2.20, 3.70 | A | Patient with diabetes receiving medications that may affect glycemic control is having regular monitoring of blood glucose concentrations | 9 | A | 1.00, 7.60 | A | Increased awareness and monitoring may require adjustment of hypoglycemic medication doses, depending upon the need to continue interacting medicines. For example, commencement of oral corticosteroids may worsen diabetes control[39] |
| 18. | Patient with diabetes has had an HbA1c measurement within the previous 6 months                                         | 8 | A | 1.20, 7.45 | A | Patient with diabetes has had an HbA1c measurement within the previous 6 months                                                           | 8 | A | 1.00, 7.60 | A | No change                                                                                                                                                                                                                                |
| 19. | Patient taking metformin for diabetes has had the dose adjusted for                                                     | 8 | A | 1.20, 7.45 | A | Patient taking metformin for diabetes has had the dose adjusted for renal function                                                        | 9 | A | 1.00, 7.60 | A | Creatinine clearance may represent only one of the methods used to determine                                                                                                                                                             |

|     |                                                                                                         |   |                |            |   |                                                                                                                       |   |   |            |   |                                                                                                                                                                                                                                |
|-----|---------------------------------------------------------------------------------------------------------|---|----------------|------------|---|-----------------------------------------------------------------------------------------------------------------------|---|---|------------|---|--------------------------------------------------------------------------------------------------------------------------------------------------------------------------------------------------------------------------------|
|     | creatinine clearance                                                                                    |   |                |            |   |                                                                                                                       |   |   |            |   | renal function                                                                                                                                                                                                                 |
| 20. | Patient taking metformin for diabetes is NOT concurrently taking glibenclamide                          | 6 | D              | 2.40, 3.85 | A | Deleted                                                                                                               | - |   | -          | - | Glibenclamide is an uncommonly used hypoglycaemic                                                                                                                                                                              |
| 21. | Patient with OA pain interfering with daily activities has been trialled on paracetamol 2 – 4 g per day | 8 | A              | 2.00, 6.85 | A | Patient with OA pain interfering with daily activities has been trialled on regular paracetamol 2 – 4 g per day       | 9 | A | 0.40, 8.05 | A | “Regular” paracetamol added to improve quality of indicator                                                                                                                                                                    |
| 22. | Patient taking analgesic(s) does NOT have pain that interferes with daily activities                    | 7 | D              | 3.2, 4.75  | A | Patient taking analgesic(s) has had the dose(s) titrated in order to avoid pain that interferes with daily activities | 8 | A | 2.00, 6.85 | A | Indicator rephrased to improve clarity                                                                                                                                                                                         |
| 23. | Patient taking an opioid is on prophylactic treatment for constipation                                  | 8 | A              | 2.00, 6.85 | A | Patient taking a regular opioid is on prophylactic treatment for constipation                                         | 9 | A | 1.00, 7.60 | A | “Regular” use added as “when required” use may not always require prophylactic treatment                                                                                                                                       |
| 24. | Patient with risk factors for impaired renal function is NOT taking an NSAID                            | 8 | A              | 1.00, 7.60 | A | Patient with risk factors for impaired renal function is NOT taking an NSAID                                          | 8 | A | 1.00, 7.60 | A | No change                                                                                                                                                                                                                      |
| 25. | Patient is NOT concurrently taking an ACEI or A2A, diuretic and NSAID (excluding low dose aspirin)      | 9 | A              | 1.00, 7.60 | A | Patient is NOT concurrently taking an ACEI or A2A, diuretic and NSAID (excluding low dose aspirin)                    | 9 | A | 1.00, 7.60 | A | No change                                                                                                                                                                                                                      |
| 26. | Patient with sleep disturbance or anxiety has NOT been taking benzodiazepines for > 4 weeks             | 8 | A              | 1.20, 7.45 | A | Patient has NOT been taking benzodiazepines for > 4 weeks                                                             | 9 | A | 1.00, 7.60 | A | “Sleep disturbance or anxiety” deleted. Benzodiazepines increase the risk of oversedation, ataxia, confusion, falls, respiratory depression and short-term memory impairment, and are recommended for short term use only[39]. |
| 27. | Patient with depression is NOT taking                                                                   | 7 | <del>7</del> D | 1.00, 4.60 | A | Deleted                                                                                                               | - |   | -          | - | The issue of anticholinergic burden is addressed by                                                                                                                                                                            |



|     |                                                                                                               |   |   |            |   |                                                                                                                 |   |   |            |   |                                                                                                 |
|-----|---------------------------------------------------------------------------------------------------------------|---|---|------------|---|-----------------------------------------------------------------------------------------------------------------|---|---|------------|---|-------------------------------------------------------------------------------------------------|
|     | anticholinergic type antidepressants                                                                          |   |   |            |   |                                                                                                                 |   |   |            |   | indicator 32                                                                                    |
| 28. | Patient with a history of falls is NOT taking psychotropic medications                                        | 8 | A | 1.00, 6.10 | A | Patient with a history of falls is NOT taking psychotropic medications                                          | 8 | A | 1.40, 6.40 | A | No change                                                                                       |
| 29. | Patient taking an SSRI is NOT concurrently taking medications known to increase the risk of GI bleeding       | 7 | D | 2.20, 5.20 | A | Deleted                                                                                                         | - |   | -          | - | Redundant indicator. This issue would be identified by indicator 47.                            |
| 30. | Patient taking an SSRI is NOT concurrently taking other medications that may contribute to serotonin toxicity | 8 | A | 2.20, 6.70 | A | Patient taking an SSRI is NOT concurrently taking other medications that may contribute to serotonin toxicity   | 8 | A | 1.40, 6.40 | A | No change. Retained by panel due to its potential significance, despite the use of indicator 47 |
| 31. | Patient with dementia is NOT receiving anticholinergic medication                                             | 8 | A | 1.20, 7.45 | A | Patient with dementia is NOT receiving anticholinergic medication                                               | 8 | A | 1.00, 7.60 | A | No change                                                                                       |
| 32. | Patient is NOT taking more than one medication with anticholinergic activity                                  | 8 | A | 0.2, 6.70  | A | Patient is not taking medication with SIGNIFICANT anticholinergic activity                                      | 8 | A | 0.40, 7.15 | A | Rewording focuses on the issue of anticholinergic burden                                        |
| 33. | Patient taking a PPI is NOT taking a medication that may cause dyspepsia                                      | 7 | D | 3.20, 4.45 | A | Patient taking a PPI is NOT taking a medication that may cause dyspepsia unless prescribed for gastroprotection | 8 | A | 0.40, 7.15 | A | “Unless prescribed for gastroprotection” added to improve the accuracy of the indicator         |
| 34. | Patient with COPD is NOT taking benzodiazepines                                                               | 7 | D | 3.00, 6.10 | A | Patient with COPD is NOT taking benzodiazepines                                                                 | 8 | A | 1.00, 6.10 | A | No change                                                                                       |
| 35. | Patient with asthma using an inhaled LABA is also using an inhaled corticosteroid                             | 9 | A | 0.20, 8.20 | A | Patient with asthma using an inhaled LABA is also using an inhaled corticosteroid                               | 9 | A | 1.00, 7.60 | A | No change                                                                                       |
| 36. | Patient using salbutamol or terbutaline inhaler more                                                          | 9 | A | 1.00, 7.60 | A | Patient using salbutamol or terbutaline inhaler more than                                                       | 9 | A | 0.40, 8.05 | A | “Except for exercise-induced asthma” added to improve the                                       |

|     |                                                                                                                                                 |   |      |            |   |                                                                                                                 |   |   |            |   |                                                                                                                          |
|-----|-------------------------------------------------------------------------------------------------------------------------------------------------|---|------|------------|---|-----------------------------------------------------------------------------------------------------------------|---|---|------------|---|--------------------------------------------------------------------------------------------------------------------------|
|     | than 3 times per week for reversible airways disease has been prescribed an ICS                                                                 |   |      |            |   | 3 times per week for reversible airways disease has been prescribed an ICS (except for exercise-induced asthma) |   |   |            |   | accuracy of the indicator                                                                                                |
| 37. | Patient with asthma is NOT taking a medication that may worsen asthma                                                                           | 7 | A    | 1.20, 6.25 | A | Patient with asthma is NOT taking a medication that may worsen asthma                                           | 8 | A | 1.00, 7.60 | A | No change                                                                                                                |
| 38. | Female patient with recurrent UTIs has been prescribed intravaginal estrogen                                                                    | 5 | D    | 2.00, 3.85 | A | Deleted                                                                                                         | - |   | -          | - | Evidence for this indicator was judged to be poor[68]                                                                    |
| 39. | Patient with a creatinine clearance < 60 ml/min is NOT receiving nitrofurantoin for UTI                                                         | 8 | A    | 2.00, 6.85 | A | Patient with a UTI is not receiving nitrofurantoin or hexamine for prophylaxis or acute treatment               | 8 | A | 1.00, 7.60 | A | Hexamine and nitrofurantoin are not recommended for the prophylactic or acute treatment of UTI in older patients[39 ,49] |
| 40. | Patient with a creatinine clearance < 50ml/min is NOT receiving hexamine for UTI prophylaxis                                                    | 8 | A    | 1.20, 6.25 | A | Deleted                                                                                                         | - | - | -          | - | Hexamine and are not recommended for the prophylactic treatment of UTI in older patients[39 ,49].                        |
| 41. | Patient with an URTI is NOT receiving antibiotics                                                                                               | 7 | 7, D | 3.00, 4.60 | A | Patient with a non-specific URTI is NOT receiving antibiotics                                                   | 8 | A | 1.00, 7.60 | A | “non-specific” added to improve the accuracy of the indicator                                                            |
| 42. | Patient with osteoporosis who is not receiving at least 600 IU Vitamin D daily from dietary sources is receiving supplementation with vitamin D | 8 | D    | 3.20, 4.75 | A | Deleted                                                                                                         | - |   | -          | - | This indicator is covered by indicator 44 and an expanded footnote                                                       |
| 43. | Patient with osteoporosis who is not receiving at least 1200 mg of calcium daily from dietary sources is receiving calcium                      | 8 | A    | 1.60, 5.95 | A | Deleted                                                                                                         | - |   | -          | - | This indicator is covered by indicator 44 and an expanded footnote                                                       |

1  
2  
3  
4  
5  
6  
7  
8  
9  
10  
11  
12  
13  
14  
15  
16  
17  
18  
19  
20  
21  
22  
23  
24  
25  
26  
27  
28  
29  
30  
31  
32  
33  
34  
35  
36  
37  
38  
39  
40  
41  
42  
43  
44  
45  
46  
47  
48  
49

|     |                                                                                                                    |   |   |            |   |                                                                                                                                                 |   |   |            |   |                                                                                                                                                                                                                                                                                                                                           |
|-----|--------------------------------------------------------------------------------------------------------------------|---|---|------------|---|-------------------------------------------------------------------------------------------------------------------------------------------------|---|---|------------|---|-------------------------------------------------------------------------------------------------------------------------------------------------------------------------------------------------------------------------------------------------------------------------------------------------------------------------------------------|
|     | supplementation                                                                                                    |   |   |            |   |                                                                                                                                                 |   |   |            |   |                                                                                                                                                                                                                                                                                                                                           |
| 44. | Patient with osteoporosis is receiving anti-osteoporotic medication                                                | 7 | A | 1.00, 6.10 | A | Patient with osteoporosis is receiving appropriate anti-osteoporotic medication                                                                 | 8 | A | 0.40, 7.15 | A | “Appropriate” added and an expanded footnote to include calcium and vitamin D                                                                                                                                                                                                                                                             |
| 45. | Patient using topical corticosteroids does NOT have itch or discomfort that interferes with daily activities       | 6 | D | 2.00, 5.35 | A | Patient using topical corticosteroids for contact or allergic dermatitis does not have itch or discomfort that interferes with daily activities | - |   | -          | - | This indicator was deleted by the panel because there was no identification of the diagnosis/condition being treated. However, contact and allergic dermatitis is one of the top 40 most frequently managed problems by general practitioners in patients ≥ 65 years old in Australia,[36] so this indicator was re-worded by the authors |
| 46. | Patient has received influenza and pneumococcal vaccination                                                        | 9 | A | 1.00, 7.60 | A | Patient has received influenza and pneumococcal vaccination                                                                                     | 9 | A | 0.00, 8.35 | A | No change                                                                                                                                                                                                                                                                                                                                 |
| 47. | Patient has no <i>significant</i> medication interactions (agreement between two medication interaction databases) | 8 | D | 3.00, 6.10 | A | Patient has no <i>clinically significant</i> medication interactions (agreement between two medication interaction databases)                   | 8 | A | 0.40, 7.15 | A | “Clinically” added to improve the accuracy of the indicator                                                                                                                                                                                                                                                                               |
| 48. | Patient has had no <i>significant</i> change in medications in the previous 90 days                                | 5 | D | 1.20, 3.25 | A | Deleted                                                                                                                                         | - |   | -          | - | It was preferred to transfer this information to the explanatory text of the article                                                                                                                                                                                                                                                      |
| New |                                                                                                                    |   |   |            |   | Patient taking thyroid hormone replacement therapy has had a serum TSH measurement within the previous 12 months                                |   |   |            |   | Thyroid disease is a common medical condition managed by GPs in older Australians[36 ,69]                                                                                                                                                                                                                                                 |
| New |                                                                                                                    |   |   |            |   | Patient with coronary heart disease is taking an ACEI or A2A                                                                                    |   |   |            |   | ACEIs or A2As reduce the risk of cardiovascular events[70 ,71]. However, a high incidence of comorbid disease                                                                                                                                                                                                                             |



Table 3 Validated prescribing appropriateness criteria for older Australians ( $\geq 65$  years) for commonly used medications and medical conditions<sup>a,b,c</sup> (\*for usage information for certain criteria, see Table 4)

| Criteria No. | Validated criteria                                                                                                                                                        |
|--------------|---------------------------------------------------------------------------------------------------------------------------------------------------------------------------|
| 1            | Patient taking an antihypertensive is at the target blood pressure appropriate for them*                                                                                  |
| 2            | Patient at high risk of a recurrent cardiovascular event is taking a statin*                                                                                              |
| 3            | Patient with CHD or a history of MI is taking a beta blocker                                                                                                              |
| 4            | Patient with CHD or a history of MI is taking an antiplatelet agent unless taking an oral anticoagulant*                                                                  |
| 5            | Patient with CHD is taking an ACEI or A2A*                                                                                                                                |
| 6            | Patient with stable heart failure with HF-LVSD is taking a beta blocker                                                                                                   |
| 7            | Patient with stable heart failure with HF-LVSD is taking an ACEI or A2A*                                                                                                  |
| 8            | Patient with HF-LVSD or HFPEF is NOT taking medications which may exacerbate heart failure                                                                                |
| 9            | Patient with AF is taking an oral anticoagulant or an antiplatelet agent, depending upon stroke risk and bleeding risk*                                                   |
| 10           | Patient taking warfarin for AF has an INR between 2-3                                                                                                                     |
| 11           | Patient with a history of non-hemorrhagic stroke or TIA is taking an antiplatelet agent unless taking an anticoagulant                                                    |
| 12           | Patient with risk factors for statin induced myopathy is not taking a high dose of a high potency statin*                                                                 |
| 13           | Patient with cardiovascular disease is NOT taking an NSAID                                                                                                                |
| 14           | Patient with cardiovascular, respiratory disease or diabetes who smokes has been offered smoking cessation options*                                                       |
| 15           | Patient with type 2 diabetes and hypertension and albuminuria is taking an ACEI or A2A                                                                                    |
| 16           | Patient with diabetes at high risk of a cardiovascular event is taking an antiplatelet agent unless on an anticoagulant                                                   |
| 17           | Patient with diabetes taking medications that may affect glycemic control is receiving regular monitoring of blood glucose concentrations*                                |
| 18           | Patient with diabetes has had an HbA1c measurement within the previous 6 months*                                                                                          |
| 19           | Patient taking metformin for diabetes has had the dose adjusted for renal function*                                                                                       |
| 20           | Patient taking thyroid hormone replacement therapy has had a serum TSH measurement within the previous 12 months                                                          |
| 21           | Patient with OA pain interfering with daily activities has been trialled on regular paracetamol 2 – 4 g per day                                                           |
| 22           | Patient taking analgesic(s) has had the dose(s) titrated in order to avoid pain that interferes with daily activities                                                     |
| 23           | Patient taking a regular opioid is on prophylactic treatment for constipation                                                                                             |
| 24           | Patient with risk factors for impaired renal function is NOT taking an NSAID*                                                                                             |
| 25           | Patient is NOT concurrently taking an ACEI or A2A, diuretic and NSAID (excluding low dose aspirin)                                                                        |
| 26           | Patient has NOT been taking benzodiazepines for > 4 weeks*                                                                                                                |
| 27           | Patient with a history of falls is NOT taking psychotropic medications*                                                                                                   |
| 28           | Patient taking an SSRI is NOT concurrently taking other medications that may contribute to serotonin toxicity*                                                            |
| 29           | Patient with dementia is NOT receiving anticholinergic medication*                                                                                                        |
| 30           | Patient is not taking medication with SIGNIFICANT anticholinergic activity*                                                                                               |
| 31           | Patient taking a PPI is NOT taking a medication that may cause dyspepsia unless prescribed for gastroprotection*                                                          |
| 32           | Patient with COPD is NOT taking benzodiazepines                                                                                                                           |
| 33           | Patient with asthma using an inhaled LABA is also using an inhaled corticosteroid                                                                                         |
| 34           | Patient using salbutamol or terbutaline inhaler more than 3 times per week for reversible airways disease has been prescribed an ICS (except for exercise-induced asthma) |
| 35           | Patient with asthma is NOT taking a medication that may worsen asthma*                                                                                                    |
| 36           | Patient with a UTI is not receiving nitrofurantoin or hexamine for prophylaxis or acute treatment                                                                         |
| 37           | Patient with a non-specific URTI is NOT receiving antibiotics*                                                                                                            |
| 38           | Patient with osteoporosis is receiving appropriate anti-osteoporotic medication*                                                                                          |

|    |                                                                                                                                                 |
|----|-------------------------------------------------------------------------------------------------------------------------------------------------|
| 39 | Patient has received influenza and pneumococcal vaccination                                                                                     |
| 40 | Patient using topical corticosteroids for contact or allergic dermatitis does not have itch or discomfort that interferes with daily activities |
| 41 | Patient has no <i>clinically significant</i> medication interactions (agreement between two medication interaction databases)*                  |

a – These criteria are intended to be used by appropriately trained and qualified health professionals, as a tool to assist in making medication management decisions as part of the medication review process

b – Prior to the commencement of any medication, the contraindications and precautions for that medication should be considered

c – The intended result of using these criteria is the reasonable and appropriate medication management of individual patients, rather than the systematic application of these criteria to all patients irrespective of other considerations

A2A = angiotensin 2 receptor antagonist, ACEI = angiotensin converting enzyme inhibitor, AF = atrial fibrillation, CHD = coronary heart disease, COPD = chronic obstructive pulmonary disease, HbA1c = glycosylated haemoglobin, HF-LVSD = Heart failure with left ventricular systolic dysfunction, HFPEF = heart failure with preserved ejection fraction, ICS = inhaled corticosteroid, INR = international normalised ratio, MI = myocardial infarct, LABA = long acting beta agonist, NSAID = non-steroidal anti-inflammatory drug, PPI = proton pump inhibitor, SSRI = selective serotonin reuptake inhibitor, TIA = transient ischemic attack, TSH = thyroid stimulating hormone, UTI = urinary tract infection.

| Criteria No.  | Description of issue                                                            | Details                                                                                                                                                                                                                                                                                                                                                                                                                                                                                              |
|---------------|---------------------------------------------------------------------------------|------------------------------------------------------------------------------------------------------------------------------------------------------------------------------------------------------------------------------------------------------------------------------------------------------------------------------------------------------------------------------------------------------------------------------------------------------------------------------------------------------|
| 1             | Blood pressure targets (mm Hg)                                                  | Proteinuria >1 g/day (with or without diabetes) < 125/75. CHD, diabetes, chronic kidney disease, proteinuria (> 300mg/day), stroke or TIA < 130/80. Others <140/90[39] Current blood pressure guidelines may not be appropriate for all older patients, such as the oldest old; in palliative care; and for those who are/become hypotensive and/or fall[47 ,49-52 ,73]                                                                                                                              |
| 2             | Patients at high risk of a cardiovascular event (> 15% within the next 5 years) | Age > 75 years; history of diabetes, moderate or severe chronic kidney disease (persistent proteinuria, GFR < 60ml/min, eGFR < 45 ml/min/1.73m <sup>2</sup> ), hypercholesterolemia (familial, TC > 7.5 mmol/L), SBP ≥ 180 or DBP ≥ 110 mmHg, ISH (SBP ≥160 and DBP ≤70 mmHg), coronary heart disease, stroke, TIA, PAD, heart failure, aortic disease, LVH, family history of premature CVD.[39 ,74] The benefits of statins and risks of adverse effects are uncertain towards the end of life[75] |
| 4             | Antiplatelet agents and oral anticoagulants                                     | Antiplatelet agents – aspirin, clopidogrel, dipyridamole, ticlopidine. Oral anticoagulants – dabigatran, phenindione, rivaroxaban, warfarin                                                                                                                                                                                                                                                                                                                                                          |
| 5             | Use of ACEI or A2A in CHD                                                       | A high incidence of comorbid disease in CHD (typically arthritis and/or respiratory disease) or other clinical factors (e.g. dizziness or falls, cognitive impairment, use of > 5 medicines, patient preference) may be considerations in determining medication prescribing priorities[30 ,34 ,72]                                                                                                                                                                                                  |
| <del>78</del> | Medications that may exacerbate heart failure                                   | HF-LVSD – anti-arrhythmic medicines (except for heart failure-specific beta-blockers and amiodarone), non-dihydropyridine calcium-channel blockers (e.g. verapamil or diltiazem), clozapine, corticosteroids, NSAIDs (excluding low dose aspirin), thiazolidinediones, TNF-alpha inhibitors, topical beta blockers (when added to systemic beta blockers), tricyclic antidepressants[49 ,76 ,77]. HFPEF – venodilators (e.g. isosorbide dinitrate), potent arterial                                  |



|           |                                                                     |                                                                                                                                                                                                                                                                                                                                                                                                                                                                    |
|-----------|---------------------------------------------------------------------|--------------------------------------------------------------------------------------------------------------------------------------------------------------------------------------------------------------------------------------------------------------------------------------------------------------------------------------------------------------------------------------------------------------------------------------------------------------------|
|           |                                                                     | vasodilators (e.g. hydralazine), digoxin (unless AF), excessive use of diuretics. Note; verapamil and diltiazem may improve diastolic function in HFPEF[60]                                                                                                                                                                                                                                                                                                        |
| 9         | Stroke risk and bleeding risk                                       | Stroke risk can be calculated using CHADS <sub>2</sub> or CHA <sub>2</sub> DS <sub>2</sub> -VASc.[78] Risk factors for coumarin-related bleeding complications: advanced age, uncontrolled hypertension, history of MI or IHD, cerebrovascular disease, anaemia or a history of bleeding, concomitant use of aspirin/polypharmacy[79]                                                                                                                              |
| 12        | Risk factors for statin myopathy; high dose of high potency statins | Age > 70 years, presence of disease states (diabetes, hypothyroidism, renal and hepatic disease), concurrent use of cyclosporin, fibrates, CYP3A4 inhibitors (e.g. diltiazem, macrolides, protease inhibitors, verapamil [except for pravastatin and rosuvastatin], severe intercurrent illness (infection, trauma, metabolic disorder), dose ≥ 40 mg daily. High dose of high potency statins ; ≥ 40 mg atorvastatin or simvastatin; > 10mg rosuvastatin [39 ,80] |
| 14        | Smoking cessation options                                           | Counselling (extended, brief, telephone), support services (professional, family, social, work), pharmacotherapy.                                                                                                                                                                                                                                                                                                                                                  |
| 17        | Medications that may affect glycemic control                        | Increase blood glucose: baclofen, clozapine, cyclosporin, glucocorticoids, haloperidol, olanzapine, paliperidone, phenytoin, protease inhibitors, quetiapine, risperidone, sirolimus, tacrolimus, and tricyclic antidepressants. Decrease blood glucose: excessive alcohol, disopyramide, perhexiline, quinine, trimethoprim/sulphamethoxazole[39]                                                                                                                 |
| 18        | Six monthly HbA1c measurements                                      | Treatment intensification in response to less than optimally controlled HbA1c may be inappropriate in patients with limited life expectancy or in frail older patients[81 ,82]                                                                                                                                                                                                                                                                                     |
| 19        | Metformin dose                                                      | Based on creatinine clearance: 60-90 ml/min, maximum 2g daily; 30-60 ml/min, maximum 1g daily; < 30 ml/min avoid use.[39] Based on eGFR: Review dose if eGFR< 45 ml/min/1.73m <sup>2</sup> ; avoid if eGFR<30 ml/min/1.73m <sup>2</sup> [83]                                                                                                                                                                                                                       |
| 24        | Risk factors for impaired renal function                            | Volume depletion, age > 60 years, salt-restricted diet, concomitant use of ACEIs, A2As, cyclosporin or aspirin, GFR ≤ 60 ml/min, cirrhosis, heart failure[84]                                                                                                                                                                                                                                                                                                      |
| 26        | Benzodiazepine use                                                  | Benzodiazepines increase the risk of oversedation, ataxia, confusion, falls, respiratory depression and short-term memory impairment, and are recommended for short term use only.[39]                                                                                                                                                                                                                                                                             |
| 27        | Falls and psychotropic medications                                  | Psychotropic medications = antidepressants (all), anxiolytics/hypnotics, antipsychotics.[85 ,86] Medications causing (postural) hypotension (e.g. cardiovascular medicines) or cognitive impairment (e.g. opioids) may also increase the risk of falls[49 ,87]                                                                                                                                                                                                     |
| 28        | Medications that may contribute to serotonin syndrome               | Antidepressants - desvenlafaxine, duloxetine, St John's wort, MAOIs (including moclobemide), SSRIs, TCAs, venlafaxine. Opioids - dextromethorphan, fentanyl, pethidine, tramadol. Others - selegiline, linezolid, lithium, tryptophan[39]                                                                                                                                                                                                                          |
| 29 and 30 | Medications with significant anticholinergic activity               | amantadine, amitriptyline, atropine*, belladonna alkaloids*, benzhexol, benzotropine, biperiden, brompheniramine*, chlorpheniramine, chlorpromazine, clomipramine, clozapine, cyclizine, cyclopentolate, cyproheptadine*, darifenacin, dexchlorpheniramine*, dimenhydrinate*, diphenhydramine*, disopyramide, dothiepin, doxepin, glycopyrrolate,                                                                                                                  |

|    |                                                |                                                                                                                                                                                                                                                                                                                                                                                                                                                                                                                                                                                                                                                                                                                                                                                                                                                                                                                                                                                                                                                          |
|----|------------------------------------------------|----------------------------------------------------------------------------------------------------------------------------------------------------------------------------------------------------------------------------------------------------------------------------------------------------------------------------------------------------------------------------------------------------------------------------------------------------------------------------------------------------------------------------------------------------------------------------------------------------------------------------------------------------------------------------------------------------------------------------------------------------------------------------------------------------------------------------------------------------------------------------------------------------------------------------------------------------------------------------------------------------------------------------------------------------------|
|    |                                                | homatropine, hyoscine* (butylbromide or hydrobromide), imipramine, ipratropium (nebulised), mianserin, nortriptyline, olanzapine, orphenadrine, oxybutynin, pericyazine, pheniramine*, pimozone, pizotifen, prochlorperazine, promethazine*, propantheline, solifenacin, tiotropium, tolterodine, trimeprazine*, trimipramine, triprolidine*, tropicamide (* available over-the-counter in Australia)[39]                                                                                                                                                                                                                                                                                                                                                                                                                                                                                                                                                                                                                                                |
| 31 | Medications that may cause dyspepsia           | Drugs with anticholinergic effects, aspirin, benzodiazepines, bisphosphonates, calcium channel antagonists, oral corticosteroids, dopaminergic drugs, doxycycline, erythromycin, ferrous sulphate, nitrates, NSAIDs, potassium chloride (slow release)[38,39,49,88]                                                                                                                                                                                                                                                                                                                                                                                                                                                                                                                                                                                                                                                                                                                                                                                      |
| 35 | Medications that may worsen asthma             | Aspirin, beta blockers (including eye drops), carbamazepine, echinacea, NSAIDs, royal jelly[39,89]                                                                                                                                                                                                                                                                                                                                                                                                                                                                                                                                                                                                                                                                                                                                                                                                                                                                                                                                                       |
| 38 | Non-specific URTI                              | Acute bronchitis, pharyngitis, tonsillitis, nonsuppurative otitis media and sinusitis[38]                                                                                                                                                                                                                                                                                                                                                                                                                                                                                                                                                                                                                                                                                                                                                                                                                                                                                                                                                                |
| 39 | Appropriate anti-osteoporotic medication       | Recommended daily intake (RDI) of calcium from dietary sources and/or supplements = 1300-1500 mg daily. RDI for Vitamin D from sunlight and/or dietary sources and/or supplements = 600 iu daily. Anti-osteoporotic medication = bisphosphonates, calcitriol, denosumab, HRT, raloxifene, strontium, teriparatide.[39] Evidence for fracture risk reduction in women $\geq 75$ years is either absent or lacking in NVF for alendronate, risedronate and teriparatide, and in HF for alendronate, risedronate, zoledronic acid and teriparatide. There is no data available for denosumab in VF, NVF or HF.[90] The optimal duration of bisphosphonate therapy is uncertain. Evidence supports the use of strontium for 5 years, raloxifene for 4 years, zoledronic acid and denosumab for 3 years. Exposure to teriparatide should be limited to 18 months.[91] Data are limited for non-ambulatory patients and those with significant comorbidities.[92] It should be noted that bone strength is only one of many determinants of fracture risk.[93] |
| 42 | Clinically significant medication interactions | Medication interactions that may interfere with the outcome of therapy                                                                                                                                                                                                                                                                                                                                                                                                                                                                                                                                                                                                                                                                                                                                                                                                                                                                                                                                                                                   |

A2A = angiotensin 2 receptor antagonist, ACE = angiotensin converting enzyme, ACEI = angiotensin converting enzyme inhibitor, AF = atrial fibrillation, CHADS<sub>2</sub> = Cardiac failure, Hypertension, Age, Diabetes, Stroke [doubled], CHA<sub>2</sub>DS<sub>2</sub>-VASc = Cardiac failure or dysfunction, Hypertension, Age over 75 years [doubled], Diabetes, Stroke [doubled], Vascular disease, Age 65-74 years, Sex category [female], CHD = coronary heart disease, CVD = cardiovascular disease, DBP = diastolic blood pressure, GFR = glomerular filtration rate, HF = hip fracture, HF-LVSD = Heart failure with left ventricular systolic dysfunction, HFPEF = heart failure with preserved ejection fraction, HRT = hormone replacement therapy, IHD = ischemic heart disease, ISH = isolated systolic hypertension, LVH = left ventricular hypertrophy, MAOI = monoamine oxidase inhibitor, MI = myocardial infarct, NSAID = non-steroidal anti-inflammatory drug, NVF = non-vertebral fracture, PAD = peripheral arterial disease, SBP = systolic blood pressure, SSRI = selective serotonin reuptake inhibitor, TC = total cholesterol, TCA = tricyclic antidepressant, TIA = transient ischemic attack, TNF = tumour necrosis factor, URTI = upper respiratory tract infection, VF = vertebral fracture

## DISCUSSION

This study identified a panel of medication management experts to discuss and validate a set of 41 prescribing appropriateness criteria for commonly used medicines and medical conditions in older ( $\geq 65$  years) Australians. Panel discussion resulted in retention of 39 of the

originally proposed 48 criteria, with 25 being reworded, and 14 accepted with no change. These criteria do not simply represent a list of medications to avoid in the elderly, but also address issues such as the need for additional therapy (e.g. criteria 23 and 34, Table 3), additional tests (e.g. criteria 18-20, Table 3), ineffective treatment (e.g. criteria 22 and 37, Table 3) and medication monitoring (e.g. criteria 10 and 20, Table 3). They were designed to contribute to the Australian quality use of medicines (QUM) process.[94] The information required to apply these criteria may be obtained from a variety of sources such as the patient or their carer, and pharmacist, or patient medical notes and/or their health care professional. [95] It may also be provided by a Home Medicines Review referral form from the patients general practitioner.[23] Due to their currency and the nature of their development, we expect these criteria to make a significant contribution to the detection of DRPs in the Australian healthcare environment. For example, in a review of prescribing indicators for two conditions, [36] which are common in older people in Australia – type two diabetes and cardiovascular disease [96, 97] – disease and drug-orientated criteria such as ours have shown good content, face, concurrent and predictive validity and operational feasibility, as well as use for internal and external quality assessment in both ambulatory and hospital care.[35] Evidence practice gaps, which formed part of the developmental process for these criteria, have identified deficiencies in the treatment of these and other areas such as vaccination, asthma and pain. (, #46, #45, #360; Bajorek, 2012 #361; Heeley, 2010 #137) Evidence-practice gaps in Australia have been identified in other areas besides diabetes and cardiovascular disease, such as in asthma, pain and vaccination status.[9, 98-101] The existence of these gaps formed part of the developmental process for these criteria.

### **Prescribing appropriateness- tools in Australia**

Appropriateness of prescribing has been assessed by measures that are explicit or implicit, in an effort to identify and reduce DRPs.[102] In Australia, both types of measures have been used.[103-107] However, they have been imported into the Australian healthcare environment, with consequent shortcomings related to both the intrinsic nature of the measure, as well as environment compatibility issues. For example, in a study evaluating the impact of Home Medicine Reviews on appropriateness of prescribing, a significant number of recommendations made regarding the need for monitoring and addition of missing therapy were found to have no impact on explicitly derived scores using the Medication Appropriateness Index,[103] due to the intrinsic shortcomings of this tool. This is not a tool that gives precise guidance in relation to specific medicines.[13]

The Beers criteria,[108] perhaps the tool most widely used to assess inappropriate prescribing in older people, has been used in Australia, but with requires modifications to exclude medicines not listed for government subsidy.[107] This is because medicine availability and use in Australia is largely determined by the Australian Pharmaceutical Benefits Scheme[37]. Other Australian studies have found that some medicines listed as inappropriate by Beers may be appropriate for certain older people according to Australian practice;[105] many medicines listed by Beers are not available in Australia; and that some medicines considered

1  
2  
3 inappropriate in Australia are not listed by Beers.[106]Disagreement between Beers and other  
4 criteria, such as the improving prescribing in the elderly tool (IPET), have been  
5 identified.[109]  
6

7  
8 The Beers criteria was recently updated,[22] with approximately half the medicines listed  
9 being unavailable in Australia. Further, almost three quarters of the diseases or syndromes  
10 listed are not among the forty problems most frequently managed in patients over sixty five  
11 years of age by Australian general practitioners.[97] Beers still contains recommendations to  
12 avoid some medicines that are recommended for certain older people in Australia such as  
13 amiodarone, and it has recently been shown that rhythm control in older patients with atrial  
14 fibrillation may be more effective than rate control in reducing mortality over the long-  
15 term.[110]. Reviews of explicit and implicit criteria have identified these and other problems  
16 such as; failure to address drug-drug interactions and drug duplication, errors in  
17 recommendations, underrepresentation of certain drug categories, inclusion of infrequently  
18 prescribed drugs, criteria that are inapplicable for all situations, disagreement between  
19 criteria, and lack of organisation of criteria.[45 ,102 ,111]  
20  
21  
22  
23

24  
25 This has resulted in the development by others of criteria more suited to their own particular  
26 healthcare environment.[112 ,113] Nationally based criteria have been described as the most  
27 desirable type of criteria, as they do not necessitate adaptation to local guidelines or national  
28 formularies before they can be used with confidence. ~~{Castelino, 2009 #182;Dimitrow, 2011~~  
29 ~~#242}~~[32] In 2008 wWe therefore sought to construct and validate a set of prescribing  
30 appropriateness criteria relevant to the Australian healthcare environment. Our development  
31 process differed from most other tools[21 ,108 ,112-117] as it did not initially involve a  
32 consensus panel, which has now been addressed. This development process also resulted in  
33 criteria unavailable in other tools such as monitoring, underprescribing, need for additional  
34 tests, evaluation of smoking and vaccination status, and certain drug interactions[32 ,45 ,102]  
35 Because we have generally named drug classes rather than specific drugs (Table 3), and  
36 targeted common medical conditions found in older patients,[118 ,119] we anticipate that our  
37 work may have some international usefulness.  
38  
39  
40  
41

42  
43 Despite a desire in Australia to develop decision support tools to improve healthcare  
44 quality,[120] progress has consisted of the development of a limited number of non-age  
45 specific structure and process indicator lists for use in hospitals and general practice.[40 ,121-  
46 123] Many of these lists require updating. [32 ,113 ,124] – Currently, there is no Australian  
47 prescribing appropriateness criteria list to assist in improving medication management in  
48 older people. The usefulness of such an approach has been acknowledged, together with other  
49 approaches such as medication review.[125]  
50  
51

### 52 53 **Co-morbidity**

54 Over 80% of older Australians have three or more chronic conditions,[96] with Australian  
55 general practitioners shown to be dealing more frequently with patients presenting with three  
56 or four problems in the year 2009-10 compared with 2000-01.[126] Co-morbidity is  
57 associated with poor quality of life, physical disability, high health care use, multiple  
58  
59  
60

1  
2  
3 medicines with consequent increased risk of adverse drug events, fragmentation of care, and  
4 increased mortality.[119 ,127] Yet most Australian guidelines for chronic diseases do not  
5 modify or discuss the applicability of their recommendations to older patients with multiple  
6 comorbid conditions. [34] This situation is not restricted to Australia.[127 ,128]Because the  
7 risk of harm in older patients increases in proportion to the number of treatments prescribed,  
8 prioritization of therapeutic goals is necessary. For example, coronary heart disease (CHD) is  
9 an important ~~co~~-morbidity in Australia[77 ,96] for which treatment with ACE inhibitors or  
10 angiotensin 2 antagonists has been recommended to reduce the risk of cardiovascular  
11 events.[70 ,71] Other criteria derived outside Australia such as STOPP/START do not  
12 include this recommendation. [21] However, ~~the~~ presence of co-morbidity in CHD  
13 (commonly arthritis or respiratory disease) or other clinical factors (such as dizziness, falls or  
14 patient preference) may mean that medicines such as these are never commenced, due to  
15 consideration of other factors. While we wished to identify problems such as these, the  
16 ultimate decision regarding medicine use should always be made on a case by case basis  
17 based on clinical experience, a discussion between the health care professional and the  
18 patient, and best available evidence. be more important in determining medication priorities  
19 with respect to commencing these medicines (Table 4).[72] -Issues such as ~~this these~~ may  
20 run counter to recommendations of disease-specific, evidence-based guidelines,~~[34] and~~  
21 ~~were not contained in our original set of criteria. They have been added (where possible) to~~  
22 ~~increase relevance.~~ Addition of our criteria with this associated usage information (Table 4)  
23 to the implicit processes of Australian medication review may assist in addressing the  
24 problem of co-morbidity.  
25  
26  
27  
28  
29  
30  
31

### 32 **The Oldest Old**

33  
34  
35 Knowledge about the state of health and function of the oldest old is limited,[129] with  
36 research on their drug use being scarce, and often based on small and selected samples  
37 without comparison with other age groups.[130 ,131] We know that older patients in general  
38 are underrepresented in clinical trials, so that disease-specific guideline recommendations  
39 based on evidence may not apply to older cohorts.[34] For example, undertreatment with  
40 anti-osteoporotic medicines has been identified as a significant evidence-practice gap in  
41 Australia.[98] While STOPP/START criteria recommend calcium and vitamin D  
42 supplements,[21] no recommendations for more specific medicines are made. Further,  
43 evidence available for fracture risk reduction has been reported to differ with age.[90](~~Table~~  
44 ~~4~~). Similarly, blood pressure targets appropriate for older patients may not be appropriate for  
45 the oldest old,[50] with adverse effects for antihypertensives found to be among the most  
46 frequent in centenarians.[132]Issues regarding the oldest old appear in table 4, criteria 1, 2, 9,  
47 18, and 39. We have attempted to achieve the advantages of using mostly explicit criteria,  
48 such as ease of application, with the addition of application information (Tables 2 and 4)  
49 unavailable in our previous criteria set.  
50  
51  
52  
53  
54

### 55 **Rationale for the use of the RAND/UCLA appropriateness method**

56 The RAND/UCLA appropriateness method has been used to rate lists ranging up to over  
57 3000 indications, where panellists have been asked to use the clinical literature and their best  
58  
59  
60



1  
2  
3 clinical judgement to assess the appropriateness of performing a procedure. To do this, they  
4 have rated various clinical scenarios.[46]While the number and type of our criteria may differ  
5 to this, similar criteria have been developed using the RAND/UCLA method. For example, in  
6 the development of indicators for patients undergoing total hip or total knee replacement, one  
7 of the 68 indicators stated that for such patients, “deep venous thrombosis prophylaxis should  
8 be provided for a minimum of two weeks after hospital discharge”.[43] In the development of  
9 indicators for hazardous prescribing for GPs using this method, one of the 34 indicators  
10 identified the hazardous use of “NSAID in a patient with heart failure”.[44] We therefore  
11 followed a similar protocol.

#### 14 **Use of the RAND/UCLA appropriateness method**

15 We chose the RAND/UCLA appropriateness method, a two-round modified Delphi  
16 method[37] to select the most appropriate criteria. Unlike the Delphi method, which generally  
17 involves multiple questionnaire-driven rounds to obtain convergence of opinion, the RAND  
18 method involves an initial individual rating round, and a second face-to-face round. This  
19 method has been shown to produce results that have face, construct and predictive  
20 validity.[44,45] Systematically combining available evidence with expert opinion can create  
21 quality criteria where best evidence may be lacking.[46]

25  
26 While most lists of prescribing criteria are based on expert consensus, this has often been  
27 achieved through mail surveys rather than face-to-face meetings. {Levy, 2010  
28 #304;Dimitrow, 2011 #242;Martirosyan, 2010 #303} Although face-to-face meetings restrict  
29 panel size, they allow discussion to resolve misinterpretations, introduce new evidence, and  
30 improve clarity of criteria between rating rounds. We ensured our panel comprised different  
31 specialities, as less disagreement has been found among same-speciality panels. {Shekelle,  
32 2009 #318} We addressed concern regarding potential intimidation due to dominant panel  
33 personalities by choosing a moderator experienced in the development of these criteria and in  
34 facilitating small group discussion. Diversity of medication and disease management issues  
35 may have minimized professional, but not personal, conflict of interest issues. We used both  
36 the median panel rating and the amount of dispersion of panel ratings to identify agreement  
37 or disagreement. While it has been acknowledged that discrepancies between the two  
38 methods may occur, {Fitch, #244} discussion and second round rating resulted in agreement  
39 for all criteria for both methods.

#### 45 **The nature of decision support tools**

46 Panel members emphasized that criteria may not provide definitive answers, instead  
47 indicating potential problems that might need addressing, due to a perceived unacceptable  
48 variation in care.[133] While performance indicators are designed to measure the result of  
49 statements made in clinical practice guidelines, these guidelines often provide  
50 recommendations for care independent of other considerations such as multiple co-  
51 morbidities, advanced age, frailty, patient preferences, disease burden or limited life  
52 expectancy.[134-136] In such cases, less stringent goals, deprescribing or non-prescription  
53 may be more appropriate.[15,81,137] For example, a frail older patient with multiple co-  
54 morbidities and one or more functional impairments may have a life expectancy of  
55 approximately two years or less.[75] This raises the question of whether failure to intensify  
56  
57  
58  
59  
60



1  
2  
3 treatment[81] or to underuse evidence-based therapies[138] reflects appropriate clinical  
4 judgement or an inappropriate care gap. The panel felt strongly that use of indicators,  
5 guidelines or criteria providing clinical decision support should never replace critical thinking  
6 in patient care.[139]  
7  
8  
9

### 10 11 **Strengths and weaknesses**

12 We have followed a recommended approach [120] by suggesting criteria for which high  
13 quality evidence exists linking best practice with improved outcomes; where there are  
14 established evidence-practice gaps[98 ,99]; and where the health conditions impose the  
15 greatest burden on the healthcare system. We used a validated consensus method, an expert  
16 panel of varied specialization, and criteria written with the aim of conciseness and clarity.  
17  
18

19 In addition to face and content validity, these validated criteria, much like performance  
20 indicators, will require further developmental work to provide evidence of their acceptability,  
21 operational feasibility, reliability, and degree of predictive validity.[35 ,133] Some of this  
22 work has already commenced with the original criteria.[95] Further, these criteria only cover  
23 commonly occurring medicines and medical conditions. In addition, judgements made by an  
24 expert panel may not be representative of all health care professionals.  
25  
26  
27

### 28 29 **Intended use**

30 These validated criteria are intended for use by health care providers to enhance the quality of  
31 the Australian medication review process, for quality improvement, educational purposes and  
32 internal audit. They are also intended for external quality assessment, such as use by policy  
33 makers and for public reporting. Stakeholder involvement will be critical to facilitate local  
34 uptake and encourage further research into the effects on health outcomes.[125]  
35  
36

### 37 38 **CONCLUSION**

39 This study validated 41 prescribing appropriateness criteria to assist in identifying DRPs in  
40 older ( $\geq 65$  years) Australians. These criteria are intended to represent an addition to the  
41 medication management skill set that includes consideration of limited life expectancy,  
42 evidence base in the oldest old, drug burden and care coordination, patient and care-giver  
43 education, empowerment for self management, and shared decision making. These skills are  
44 far from a “do everything for everyone” philosophy, where aggressive treatment may  
45 encourage more care, not more appropriate care.[31 ,135] Despite the presence of clinical  
46 decision support tools, health care providers need to know how to think about clinical  
47 problems, not just what to think.[139]  
48  
49  
50  
51

52  
53 **Competing interests** None declared  
54

55 **Contributors** BJB designed and organised the study, analysed and interpreted the data and  
56 drafted the manuscript. TFC and RJM made substantial contributions to the conception,  
57 design, analysis and interpretation of the data, and to critically revising the draft. All authors  
58  
59  
60

1  
2  
3 take responsibility for the accuracy and integrity of the study. All authors have given final  
4 approval of the version to be published.  
5  
6

7 **Funding** This research received no specific grant from any funding agency in the public,  
8 commercial or not-for-profit sectors  
9

10 **Data sharing statement** No additional data are available  
11

## 12 REFERENCES

- 13  
14  
15  
16  
17  
18 1 Kwint H-F, Faber A, Gussekloo J, *et al.* Effects of Medication Review on Drug-  
19 Related Problems in Patients Using Automated Drug-Dispensing Systems. *Drugs*  
20 *& Aging* 2011;28(4):305-14.  
21 2 Ellitt GR, Engblom E, Aslani P, *et al.* Drug related problems after discharge  
22 from an Australian teaching hospital. *Pharm World Sci* 2010;32(5):622-30.  
23 3 Nishtala PS, McLachlan AJ, Bell JS, *et al.* A retrospective study of drug-related  
24 problems in Australian aged care homes: medication reviews involving  
25 pharmacists and general practitioners *Journal of Evaluation in Clinical Practice*  
26 2011;17(1):97-103.  
27 4 Stafford AC, Tenni PC, Peterson GM, *et al.* Drug-related problems identified in  
28 medication reviews by Australian pharmacists. *Pharm World Sci* 2009;31:216-23.  
29 5 Hilmer SN, Gnjdic D. The effects of polypharmacy in older adults. *Clin*  
30 *Pharmacol Ther* 2009;85:86-88.  
31 6 Pirmohamed M, James S, Meakin S, *et al.* Adverse drug reactions as cause of  
32 admission to hospital: prospective analysis of 18 820 patients. *BMJ*  
33 2004;329(7456):15-19.  
34 7 Kongkaew C, Noyce PR, Ashcroft DM. Hospital admissions associated with  
35 adverse drug reactions: A systematic review of prospective observational studies.  
36 *Ann Pharmacother* 2008;42:1017-25.  
37 8 Castelino RL, Chen TF, Guddattu V, *et al.* Use of evidence-based therapy for  
38 the prevention of cardiovascular events among older people *Eval Health Prof*  
39 2010;33(3):276-301.  
40 9 Heeley EL, Peiris DP, Patel AA, *et al.* Cardiovascular risk perception and  
41 evidence-practice gaps in Australian general practice (the AusHEART study).  
42 *MJA* 2010;192(5):254-59.  
43 10 National Institute of Clinical Studies, Australian Government. Evidence-  
44 practice gaps report, vol. 1. A review of developments 2004-2007. 2008.  
45 [http://www.nhmrc.gov.au/nics/materials-and-resources/evidence-practice-gaps-](http://www.nhmrc.gov.au/nics/materials-and-resources/evidence-practice-gaps-report-volume-one-review-developments-2004-2007)  
46 [report-volume-one-review-developments-2004-2007](http://www.nhmrc.gov.au/nics/materials-and-resources/evidence-practice-gaps-report-volume-one-review-developments-2004-2007) (accessed 18 July 2012)  
47  
48  
49  
50  
51 11 Gilbert AL, Roughead EE, Beilby J, *et al.* Collaborative medication  
52 management services: improving patient care. *MJA* 2002;177:189-92.  
53 12 Elliott RA, Martinac G, Campbell S, *et al.* Pharmacist-led medication review to  
54 identify medication-related problems in older people referred to an aged care  
55 assessment team. A randomized comparative study. *Drugs & Aging*  
56 2012;29(7):593-605.  
57  
58  
59  
60

- 1  
2  
3 13 Kaur S, Mitchell G, Vitetta L, *et al.* Interventions that can reduce inappropriate  
4 prescribing in the elderly. *Drugs Aging* 2009;26(12):1013-28.
- 5 14 Tulner LR, van Campen JPCM, Frankfort SV, *et al.* Changes in under-  
6 treatment after comprehensive geriatric assessment. An observational study.  
7 *Drugs & Aging* 2010;27(10):831-43.
- 8 15 Le Couteur DG, Banks E, Gnjjidic D, *et al.* Deprescribing. *Aust Presc*  
9 2011;34:182-5.
- 10 16 Garfinkel D, Mangin D. Feasibility study of a systemic approach for  
11 discontinuation of multiple medications in older adults. *Arch Intern Med*  
12 2010;170(18):1648-54.
- 13 17 Gill JM, Mainous AG, Koopman RJ, *et al.* Impact of EHR-based clinical  
14 decision support on adherence to guidelines for patients on NSAID's: a  
15 randomised controlled trial. *Ann Fam Med* 2011;9:22-30.
- 16 18 O'Connor PJ, Sperl-Hillen JM, Rush WA, *et al.* Impact of electronic health  
17 record clinical decision support on diabetes care; a randomised trial. *Ann Fam*  
18 *Med* 2011;9:12-21.
- 19 19 Chang C-B, Chan D-C. Comparison of published explicit criteria for potentially  
20 inappropriate medications in older adults. *Drugs & Aging* 2010;27(12):947-57.
- 21 20 Scott I, Jayathissa S. Quality of drug prescribing in older patients: is there a  
22 problem and can we improve it? *Intern Med J* 2010;40:7-18.
- 23 21 Gallagher P, Ryan C, Byrne S, *et al.* STOPP (screening tool of older person's  
24 prescriptions) and START (screening tool to alert doctors to right treatment).  
25 Consensus validation. *International Journal of Clinical Pharmacology and*  
26 *Therapeutics* 2008;46(2):72-83.
- 27 22 American Geriatrics Society updated Beers criteria for potentially  
28 inappropriate medication use in older adults. The American Geriatrics Society  
29 2012 Beers Criteria update expert panel. *J Am Geriatr Soc* 2012;60:616-31.
- 30 23 Medicare Australia [homepage on the internet]. Australian Government. Home  
31 Medicines Review. [http://www.medicareaustralia.gov.au/provider/pbs/fourth-](http://www.medicareaustralia.gov.au/provider/pbs/fourth-agreement/hmr.jsp)  
32 [agreement/hmr.jsp](http://www.medicareaustralia.gov.au/provider/pbs/fourth-agreement/hmr.jsp). (accessed 17 July 2012).
- 33 24 Guidelines for pharmacists providing Residential Medication Management  
34 Review (RMMR) and Quality Use of Medicines (QUM) services. Pharmaceutical  
35 Society of Australia 2011. [www.psa.org.au/download/practice-guidelines/rmmr-](http://www.psa.org.au/download/practice-guidelines/rmmr-and-qum-services.pdf)  
36 [and-qum-services.pdf](http://www.psa.org.au/download/practice-guidelines/rmmr-and-qum-services.pdf) (accessed 17 Aug 2012).
- 37 25 Basger BJ, Chen TF, Moles RJ. Inappropriate Medication Use and Prescribing  
38 Indicators in Elderly Australians. *Drugs Aging* 2008;25(9):777-93.
- 39 26 Chang C-B, Chen J-H, Wen C-J, *et al.* Potentially inappropriate medications in  
40 geriatric outpatients with polypharmacy: application of six sets of published  
41 explicit criteria. *Br J Clin Pharmacol* 2011;72(3):482-89.
- 42 27 Laroche ML, Charmes JP, Bouthier JP, *et al.* Inappropriate medications in the  
43 elderly. *Clin Pharmacol Ther* 2009;85(1):94-7.
- 44 28 Maio V, Jutkowitz E, Herrera K, *et al.* Appropriate medication prescribing in  
45 elderly patients: how knowledgeable are primary care physicians? A survey  
46 study in Parma, Italy. *J Clin Pharm Ther* 2011;36:468-80.
- 47 29 Resnick B, Pacala JT. 2012 Beers criteria. *J Am Geriatr Soc* 2012;60:612-13.
- 48 30 Fried TR, Tinetti ME, Iannone MA. Primary care clinicians experiences with  
49 treatment decision making for older persons with multiple conditions. *Arch*  
50 *Intern Med* 2011;171(1):75-80.
- 51 31 Hayward RA. Performance measurement in search of a path. *N Eng J Med*  
52 2007;356(9):951-52.
- 53  
54  
55  
56  
57  
58  
59  
60

- 1  
2  
3 32 Dimitrow MS, Airaksinen MSA, Kivela S-L, *et al.* Comparison of prescribing  
4 criteria to evaluate the appropriateness of drug treatment in individuals aged 65  
5 and older: A systematic review. *J Am Geriatr Soc* 2011;59(8):1521-30.
- 6 33 Mangin D, Sweeney K, Heath I. Preventative health care in elderly people needs  
7 rethinking. *BMJ* 2007;335:285-87.
- 8 34 Scott IA, Guyatt GH. Cautionary tales in the interpretation of clinical studies  
9 involving older persons. *Arch Intern Med* 2010;170(7):587-95.
- 10 35 Martirosyan L, Voorham J, Haaijer-Ruskamp FM, *et al.* A systematic literature  
11 review : prescribing indicators related to type 2 diabetes mellitus and  
12 cardiovascular risk management. *Pharmacoepidemiol Drug Saf* 2010;19:319-34.
- 13 36 Bettering the evaluation and care of health (BEACH). Family Medicine  
14 Research Centre. The University of Sydney.  
15 <http://sydney.edu.au/medicine/fmrc/beach/> (accessed 18 July 2012)
- 16 37 Access to Pharmaceutical Services. *Pharmaceutical Benefits Scheme. Department*  
17 *of Health and Ageing. Australian Government.*  
18 [http://www.health.gov.au/internet/budget/publishing.nsf/Content/2010-11\\_Health\\_PBS\\_sup1/\\$File/Outcome%20%20-%20Access%20to%20Pharmaceutical%20Services.pdf](http://www.health.gov.au/internet/budget/publishing.nsf/Content/2010-11_Health_PBS_sup1/$File/Outcome%20%20-%20Access%20to%20Pharmaceutical%20Services.pdf). (accessed 10 July 2012).
- 19 38 *eTG complete [CD-ROM]. Melbourne (VIC): Therapeutic Guidelines, 2011 Nov*  
20 *Rossi S (Editor), Australian Medicines Handbook 2012 (CD-ROM). Adelaide:*  
21 *Australian Medicines Handbook Pty Ltd; 2012*
- 22 40 NSW Therapeutic Advisory Group. Indicators for Quality Use of Medicines in  
23 Australian Hospitals 2007  
24 <http://www.ciap.health.nsw.gov.au/nswtag/documents/publications/QUMIndicators/Manual0408.pdf> (accessed 18 July 2012).
- 25 41 Fitch K, Bernstein SJ, Aguilar MS, *et al.* The RAND/UCLA Appropriateness  
26 Method User's Manual 2001. Rand Corporation.  
27 [www.rand.org/pubs/monograph\\_reports/MR1269.html](http://www.rand.org/pubs/monograph_reports/MR1269.html) (accessed 18 July 2012)
- 28 42 McGory ML, Kao KK, Shekelle PG, *et al.* Developing quality indicators for  
29 elderly surgical patients. *Ann Surg* 2009;250:338-47.
- 30 43 SooHoo NF, Lieberman JR, Farng E, *et al.* Development of quality of care  
31 indicators for patients undergoing total hip or total knee replacement. *Qual Saf*  
32 2011;20:153-57.
- 33 44 Avery AJ, Dex GM, Mulvaney C, *et al.* Development of prescribing-safety  
34 indicators got GPs using the RAND appropriateness method. *Brit J Gen Pract*  
35 2011;61:526-36.
- 36 45 Levy HB, Marcus E-L, Christen C. Beyond the Beers criteria: a comparative  
37 overview of explicit criteria *Ann Pharmacother* 2010;44:1968-75.
- 38 46 Shekelle PG. Appropriateness criteria: a useful tool for the cardiologist. *Heart*  
39 2009;95(7):517-20.
- 40 47 Hypertension and target blood pressure. National Prescribing Service.  
41 Indicators of quality prescribing in Australian general practice. A Manual for  
42 Users [online]. Available from URL:  
43 [http://www.nps.org.au/data/assets/pdf\\_file/0019/37351/indicators\\_full.pdf](http://www.nps.org.au/data/assets/pdf_file/0019/37351/indicators_full.pdf)  
44 (accessed 18 July 2012)
- 45 48 Heart Foundation Guide to management of hypertension 2008. Updated  
46 December 2010.
- 47  
48  
49  
50  
51  
52  
53  
54  
55  
56  
57  
58  
59  
60

- 1  
2  
3  
4  
5  
6  
7  
8  
9  
10  
11  
12  
13  
14  
15  
16  
17  
18  
19  
20  
21  
22  
23  
24  
25  
26  
27  
28  
29  
30  
31  
32  
33  
34  
35  
36  
37  
38  
39  
40  
41  
42  
43  
44  
45  
46  
47  
48  
49  
50  
51  
52  
53  
54  
55  
56  
57  
58  
59  
60  
61  
62  
63  
64  
65  
66  
67
- <http://www.heartfoundation.org.au/SiteCollectionDocuments/HypertensionGuidelines2008to2010Update.pdf> (accessed 18 July 2012).
- 49 *Australian Medicines Handbook Drug Choice Companion: Aged Care. 3rd edn. Adelaide: Australian Medicines Handbook Pty Ltd; 2010.*
- 50 Charpentier MM, Bundeff MM. Treating hypertension in the very elderly. *Ann Pharmacother* 2011;45:1138-45.
- 51 Gribbin J, Hubbard R, Gladman JRF, *et al.* Risk of falls associated with antihypertensive medication; population-based case control study. *Age Ageing* 2010;39:592-97.
- 52 Tinetti ME, Kumar C. The patient who falls. *JAMA* 2010;303(3):258-66.
- 53 Therapeutics Initiative. Do statins have a role in primary prevention? An update. Therapeutics letter. March-April 2010; 77: 1-5.  
<http://www.ti.ubc.ca/sites/ti.ubc.ca/files/77.pdf> (accessed 18 July 2012).
- 54 Ray KK, Seshasai SRK, Erqou S, *et al.* Statins and all-cause mortality in high-risk primary prevention. A meta-analysis of 11 randomised controlled trials involving 65,229 participants. *Arch Intern Med* 2010;170(12):1024-31.
- 55 deLorgeril M, Salen P, Abramson J, *et al.* Cholesterol lowering, cardiovascular diseases, and the rosuvastatin-JUPITER controversy. A critical reappraisal. *Arch Intern Med* 2010;170(12):1032-36.
- 56 Petersen LK, Christensen K, Kragstrup J. Lipid-lowering treatment to the end? A review of observational studies and RCTs on cholesterol and mortality in 80+-year olds. *Age Ageing* 2010;39:674-80.
- 57 Robinson JG. Lipid-lowering therapy for the primary prevention of cardiovascular disease in the elderly. Opportunities and challenges. *Drugs Aging* 2009;26(11):917-31.
- 58 Krum H, Jelinek M, Stewart S, *et al.* 2011 Update to National Heart Foundation of Australia and Cardiac Society of Australia and New Zealand guidelines for the prevention, detection and management of chronic heart failure in Australia, 2006 *MJA* 2011;194(8):405-09.
- 59 Krum H, Teerlink JR. Medical therapy for chronic heart failure. *Lancet* 2011;378:713-21.
- 60 Huang D, Cheng JWM. Pharmacologic management of heart failure with preserved ejection fraction. *Ann Pharmacother* 2010;44:1933-45.
- 61 Management of diastolic heart failure [revised 2008 June]. In: eTG complete [CD-ROM]. Melbourne: Therapeutic Guidelines Limited; 2011 Nov.
- 62 Huang N, Duggan K, Harman J. Lifestyle management of hypertension. *Aust Presc* 2008;31:150-53.
- 63 Stokes GS. Management of hypertension in the elderly patient. *Clinical Interventions in Aging* 2009;4:379-89.
- 64 Bajorek BV, Krass I, Ogle SJ, *et al.* Optimizing the use of antithrombotic therapy for atrial fibrillation in older people: A pharmacist-led multidisciplinary intervention. *J Am Geriatr Soc* 2005;53:1912-20.
- 65 De Caterina R, Hylek EM. Stroke prevention in atrial fibrillation: current status and near-future directions. *Am J Med* 2011;124:793-99.
- 66 Gillett RG, Norrell A. Considerations for safe use of statins: liver enzyme abnormalities and muscle toxicity. *Am Fam Physician* 2011;83(6):711-16.
- 67 Thomas JE, Tershakovec AM, Jones-Burton C, *et al.* Lipid lowering for secondary prevention of cardiovascular disease in older adults. *Drugs Aging* 2010;27(12):959-72.



- 1  
2  
3 68 Perrotta C, Aznar M, Mejia R, *et al.* Oestrogens for preventing recurrent  
4 urinary tract infection in postmenopausal women. *Cochrane Database of*  
5 *Systematic Reviews 2008, Issue 2. Art. No.: CD005131. DOI:*  
6 *10.1002/14651858.CD005131.pub2. 2008.*  
7  
8 69 Treatment of hypothyroidism [revised 2009 June]. In: eTG complete [CD-  
9 ROM]. Melbourne: Therapeutic Guidelines Limited; 2011 July.
- 10  
11  
12 70 Reducing Risk in Heart Disease 2007. A summary guide for preventing  
13 cardiovascular events in people with coronary heart disease. Updated 2008.  
14 National Heart Foundation of Australia and the Cardiac Society of Australia and  
15 New Zealand. [http://www.heartfoundation.org.au/information-for-](http://www.heartfoundation.org.au/information-for-professionals/Clinical-Information/Pages/coronary-heart-disease.aspx)  
16 [professionals/Clinical-Information/Pages/coronary-heart-disease.aspx](http://www.heartfoundation.org.au/information-for-professionals/Clinical-Information/Pages/coronary-heart-disease.aspx) (accessed  
17 12 July 2012).
- 18  
19 71 Volpe M. Should all patients at high cardiovascular risk receive renin-  
20 angiotensin system blockers? *Q J Med* 2012;105:11-27.
- 21 72 Boyd CM, Leff B, Wolff JL, *et al.* Informing clinical practice guideline  
22 development and implementation: prevalence of coexisting conditions among  
23 adults with coronary heart disease. *J Am Geriatr Soc* 2011;59:797-805.
- 24 73 Heart Foundation. Guide to management of Hypertension 2008 updated 2010  
25 [online].  
26 [http://www.heartfoundation.org.au/SiteCollectionDocuments/HypertensionGuid-](http://www.heartfoundation.org.au/SiteCollectionDocuments/HypertensionGuidelines2008to2010Update.pdf)  
27 [elines2008to2010Update.pdf](http://www.heartfoundation.org.au/SiteCollectionDocuments/HypertensionGuidelines2008to2010Update.pdf) [accessed 18 July 2012].
- 28  
29 74 Guidelines for the assessment of absolute cardiovascular disease risk.  
30 [http://www.heartfoundation.org.au/SiteCollectionDocuments/guidelines-](http://www.heartfoundation.org.au/SiteCollectionDocuments/guidelines-Absolute-risk.pdf)  
31 [Absolute-risk.pdf](http://www.heartfoundation.org.au/SiteCollectionDocuments/guidelines-Absolute-risk.pdf) (accessed 18 July 2012).
- 32 75 Holmes HM. Rational prescribing for patients with a reduced life expectancy.  
33 *Clin Pharmacol Ther* 2009;85(1):103-7.
- 34 76 Improving treatment of systolic heart failure. NPS News 75, 2011. National  
35 Prescribing Service Limited.  
36 [http://www.nps.org.au/ data/assets/pdf file/0006/132495/News75\\_heart\\_failure](http://www.nps.org.au/data/assets/pdf_file/0006/132495/News75_heart_failure_1011v2.pdf)  
37 [\\_1011v2.pdf](http://www.nps.org.au/data/assets/pdf_file/0006/132495/News75_heart_failure_1011v2.pdf) (accessed 18 July 2012).
- 38  
39 77 Caughey GE, Roughead EE, Shakib S, *et al.* Co-morbidity and potential  
40 treatment conflicts in elderly heart failure patients. *Drugs Aging* 2011;28(7):575-  
41 81.
- 42 78 Lip GYH, Halperin JL. Improving stroke risk stratification in atrial fibrillation.  
43 *Am J Med* 2010;123:484-88.
- 44 79 Hughes M, Lip GYH. Risk factors for anticoagulation-related bleeding  
45 complications in patients with atrial fibrillation: a systematic review. *Q J Med*  
46 2007;100:599-607.
- 47  
48 80 Statins and muscle disorders - be careful with the dose. Australian Adverse  
49 Drug Reactions Bulletin 2008; 27 (3). <http://www.tga.gov.au/pdf/aadrb-0806.pdf>  
50 (accessed 18 July 2012)
- 51 81 LeChauncy WD, Landrum CR, Urech TH, *et al.* Treating chronically ill people  
52 with diabetes mellitus with limited life expectancy: Implications for performance  
53 measurement. *J Am Geriatr Soc* 2012;DOI: 10.1111/j.1532-5415.2011.03784.x:1-  
54 9.
- 55  
56 82 Lee SJ, Boscardin WJ, Cenzer IS, *et al.* The risks and benefits of implementing  
57 glycemic control guidelines in frail older adults with diabetes mellitus. *J Am*  
58 *Geriatr Soc* 2011;59:666-72.
- 59  
60



- 1  
2  
3 83 Joint Formulary Committee. British National Formulary (online) London: BMJ  
4 Group and Pharmaceutical Press <<http://www.medicinescomplete.com>>  
5 [Accessed on 18 July 2012].  
6  
7 84 Analgesic choices in persistent pain. *Prescribing Practice Review* 2006; 35.  
8 National Prescribing Service Limited  
9 [http://www.nps.org.au/data/assets/pdf\\_file/0017/23750/ppr35\\_analgesics\\_0906.pdf](http://www.nps.org.au/data/assets/pdf_file/0017/23750/ppr35_analgesics_0906.pdf)  
10 (accessed 18 July 2012).  
11 85 Hill KD, Wee R. Psychotropic drug-induced falls in older people. A review of  
12 interventions aimed at reducing the problem. *Drugs Aging* 2012;29(1):15-30.  
13 86 Zeimer H. Medications and falls in older people. *Journal of Pharmacy Practice*  
14 *and Research* 2008;38(2):148-51.  
15 87 Caughey GE, Roughead EE, Shakib S, *et al.* Comorbidity of chronic disease and  
16 potential treatment conflicts in older people dispensed antidepressants. *Age*  
17 *Ageing* 2010;39:488-94.  
18 88 Proton pump inhibitors. NPS News 46, 2006. National Prescribing Service  
19 Limited.  
20 [http://www.nps.org.au/data/assets/pdf\\_file/0016/23821/news46\\_gord\\_ppis\\_0606.pdf](http://www.nps.org.au/data/assets/pdf_file/0016/23821/news46_gord_ppis_0606.pdf)  
21 (accessed 18 July 2012).  
22 89 National Asthma Council Australia. Asthma Management Handbook 2006.  
23 National Asthma Council Australia, Melbourne, 2006  
24 [http://www.nationalasthma.org.au/uploads/handbook/370-amh2006\\_web\\_5.pdf](http://www.nationalasthma.org.au/uploads/handbook/370-amh2006_web_5.pdf)  
25 (accessed 18 July 2012).  
26 90 Inderjeeth CA, Poland KE. Management of osteoporosis in older people. *J*  
27 *Pharm Pract Res* 2010;40:229-34.  
28 91 Reducing fracture risk in osteoporosis. NPS News 73, 2011. National Prescribing  
29 Service Limited.  
30 [http://www.nps.org.au/data/assets/pdf\\_file/0014/126401/News73\\_osteoporosis\\_0511.pdf](http://www.nps.org.au/data/assets/pdf_file/0014/126401/News73_osteoporosis_0511.pdf)  
31 (accessed 18 July 2012).  
32 92 Gates BJ, Sonnett TE, DuVall CAK, *et al.* Review of osteoporosis  
33 pharmacotherapy for geriatric patients. *Am J Geriatr Pharmacother* 2009;7:293-  
34 323.  
35 93 Cheung AM, Detsky AS. Osteoporosis and fractures - Missing the bridge?  
36 *JAMA* 2008;299(12):1468-70.  
37 94 Commonwealth of Australia. The National Strategy for Quality Use of  
38 Medicines Plain English Edition [online]. Available from URL:  
39 [http://www.health.gov.au/internet/main/Publishing.nsf/Content/CA777524C860DFF2CA256F1800468B61/\\$File/natstrateng.pdf](http://www.health.gov.au/internet/main/Publishing.nsf/Content/CA777524C860DFF2CA256F1800468B61/$File/natstrateng.pdf) [accessed 18 July 2012]  
40 95 Basger BJ, Chen TF, Moles RJ. Application of a prescribing indicators tool to  
41 assist in identifying drug-related problems in a cohort of older Australians. *Int J*  
42 *Pharm Pract* 2012;20(3):172-82.  
43 96 Caughey GE, Vitry AI, Gilbert AL, *et al.* Prevalence of comorbidity of chronic  
44 diseases in Australia. *BMC Public Health* 2008.  
45 <http://www.biomedcentral.com/1471-2458/8/221>. (accessed 18 July 2012).  
46 97 Top 40 most frequently managed problems: Patients aged 65+. Personal  
47 communication, unpublished data from the BEACH Program, Family Medicine  
48 Research Centre, University of Sydney, November 2011.  
49 <http://sydney.edu.au/medicine/fmrc/beach/index.php> (accessed 10 July 2012).  
50 98 Evidence-practice gaps report. vol. 2. National Institute of Clinical Studies.  
51 Australian Government 2005.  
52  
53  
54  
55  
56  
57  
58  
59  
60

- 1  
2  
3 [http://www.nhmrc.gov.au/nics/material\\_resources/resources/evidence\\_volume\\_t](http://www.nhmrc.gov.au/nics/material_resources/resources/evidence_volume_t)  
4 [wo.htm](http://www.nhmrc.gov.au/nics/material_resources/resources/evidence_volume_t). (accessed 12 July 2012)  
5 99 Evidence-practice gaps report. Vol. 1. National Institute of Clinical Studies,  
6 Australian Government 2003.  
7 [http://www.nhmrc.gov.au/nics/material\\_resources/resources/evidence\\_volume\\_o](http://www.nhmrc.gov.au/nics/material_resources/resources/evidence_volume_o)  
8 [ne.htm](http://www.nhmrc.gov.au/nics/material_resources/resources/evidence_volume_o). (accessed 17 July 2012).  
9  
10 100 Evidence-Practice Gaps Report Volume 1. A review of developments: 2004-  
11 2007. National Institute of Clinical Studies. Australian Government.  
12 [http://www.nhmrc.gov.au/nics/materials-and-resources/evidence-practice-gaps-](http://www.nhmrc.gov.au/nics/materials-and-resources/evidence-practice-gaps-report-volume-one-review-developments-2004-2007)  
13 [report-volume-one-review-developments-2004-2007](http://www.nhmrc.gov.au/nics/materials-and-resources/evidence-practice-gaps-report-volume-one-review-developments-2004-2007) (accessed 17 July 2012).  
14 101 Bajorek BV, Ren S. Utilisation of antithrombotic therapy for stroke prevention  
15 in atrial fibrillation in a Sydney hospital: then and now. *Int J Clin Pharm*  
16 2012;34:88-97.  
17 102 O'Connor MN, Gallagher P, O'Mahony D. Inappropriate prescribing. Criteria,  
18 detection and prevention. *Drugs Aging* 2012;29(6):437-52.  
19 103 Castelino RL, Bajorek BV, Chen TF. Retrospective evaluation of home medicine  
20 review by pharmacists in older Australian Patients using the Medication  
21 Appropriateness Index. *Ann Pharmacother* 2010;44:1922-29.  
22 104 King MA, Roberts MS. The influence of the Pharmaceutical Benefits Scheme  
23 (PBS) on inappropriate prescribing in Australian nursing homes. *Pharmacy*  
24 *World & Science* 2007;29:39-42.  
25 105 Stafford AC, Alswayan MS, Tenni PC. Inappropriate prescribing in older  
26 residents of Australian care homes. *J Clin Pharm Ther* 2011;36:33-44.  
27 106 Widagdo IS, Nyfort-Hansen K, Kowalski SR. Prevalence of potentially  
28 inappropriate medication use in elderly hospitalised patients. *J Pharm Pract Res*  
29 2011;41:122-25.  
30 107 Roughead EE, Anderson B, Gilbert AL. Potentially inappropriate prescribing  
31 among Australian veterans and war widows/widowers. *Internal Medicine Journal*  
32 2007;37:402-05.  
33 108 Fick DM, Cooper JW, Wade WE, *et al*. Updating the Beers criteria for  
34 potentially inappropriate medication use in older adults: results of a US  
35 consensus panel of experts. *Archives of Internal Medicine* 2003;163(22):2716-24.  
36 109 Ryan C, O'Mahony D, Kennedy J, *et al*. Appropriate prescribing in the elderly:  
37 an investigation of two screening tools, Beers criteria considering diagnosis and  
38 independent of diagnosis and improving prescribing in the elderly tool to identify  
39 inappropriate use of medicines in the elderly in primary care in Ireland. *J Clin*  
40 *Pharm Ther* 2009;34:369-76.  
41 110 Ionescu-Ittu R, Abrahamowicz M, Jackevicius CA, *et al*. Comparative  
42 effectiveness of rhythm control vs rate control drug treatment effect on mortality  
43 in patients with atrial fibrillation. *Arch Intern Med* 2012;172(13):997-1004.  
44 111 Page RL, Linnebur SA, Bryant LL, *et al*. Inappropriate prescribing in the  
45 hospitalised elderly patient: Defining the problem, evaluation tools, and possible  
46 solutions. *Clin Interv Aging* 2010;5:75-87.  
47 112 Holt S, Schmiedl S, Thurmann PA. Potentially inappropriate medications in the  
48 elderly: The PRISCUS list. *Deutsches Arzteblatt International* 2010;107(31-  
49 32):543-51.  
50 113 Laroche ML, Charmes JP, Merle L. Potentially inappropriate medications in  
51 the elderly: a French consensus panel list. *European Journal of Clinical*  
52 *Pharmacology* 2007;63:725-31.  
53  
54  
55  
56  
57  
58  
59  
60

- 1  
2  
3 114 Beers MH. Explicit criteria for determining potentially inappropriate  
4 medication use by the elderly. An update. *Archives of Internal Medicine*  
5 1997;157(14):1531-6.  
6  
7 115 Beers MH, Ouslander JG, Rollinger I, *et al.* Explicit criteria for determining  
8 inappropriate medication use in nursing home residents. UCLA Division of  
9 Geriatric Medicine. *Archives of Internal Medicine* 1991;151(9):1825-32.  
10  
11 116 McLeod PJ, Huang AR, Tamblyn RM, *et al.* Defining inappropriate practices in  
12 prescribing for elderly people: a national consensus panel. *CMAJ*  
13 1997;156(3):385-91.  
14  
15 117 Zhan C, Sangl J, Bierman AS, *et al.* Potentially inappropriate medication use in  
16 the community-dwelling elderly: findings from the 1996 Medical Expenditure  
17 Panel Survey. *JAMA* 2001;286(22):2823-9.  
18  
19 118 Starfield B, Lemke KW, Herbert R, *et al.* Comorbidity and the use of primary  
20 care and specialist care in the elderly. *Ann Fam Med* 2005;3:215-22.  
21  
22 119 Barnett K, Mercer SW, Norbury M, *et al.* Epidemiology of multimorbidity and  
23 implications for health care, research, and medical education: a cross-sectional  
24 study. *Lancet* 2012;380:37-43.  
25  
26 120 Evans SM, Lowinger JS, Sprivulis PC, *et al.* Prioritizing quality indicator  
27 development across the healthcare system: identifying what to measure. *Intern*  
28 *Med J* 2009;39:648-54.  
29  
30 121 Elliott RA, Woodward MC, Osborne CA. Indicators of prescribing quality for  
31 elderly hospital inpatients. *Aust J Hosp Pharm* 2001;31:19-25.  
32  
33 122 National Prescribing Service. Indicators of quality prescribing in Australian  
34 general practice 2006. A Manual for Users.  
35 [http://www.nps.org.au/  
36 data/assets/pdf\\_file/0019/37351/indicators\\_full.pdf](http://www.nps.org.au/data/assets/pdf_file/0019/37351/indicators_full.pdf)  
37 (accessed 18 July 2012).  
38  
39 123 A proposed set of clinical indicators for stakeholder comment by 30 July 2012.  
40 RACGP clinical improvement unit practice, policy and innovation department.  
41 The Royal Australian College of General Practitioners.  
42 [http://www.racgp.org.au/Content/NavigationMenu/ClinicalResources/Clinicalindicators/2012ClinicalIndicators\\_ConsultationPaper.pdf](http://www.racgp.org.au/Content/NavigationMenu/ClinicalResources/Clinicalindicators/2012ClinicalIndicators_ConsultationPaper.pdf) (accessed 16 July 2012).  
43  
44 124 Morris CJ, Cantrill JA, Hepler CD, *et al.* Preventing drug-related morbidity--  
45 determining valid indicators. *International Journal for Quality in Health Care*  
46 2002;14(3):183-98.  
47  
48 125 Bell JS, Le Couteur DG, McLachlan AJ, *et al.* Improving medicine selection for  
49 older people. Do we need an Australian classification for inappropriate  
50 medicines use? *Aust Fam Physician* 2012;41:9-10.  
51  
52 126 Britt H, Miller GC, Charles J, *et al.* General practice activity in Australia 2000-1  
53 to 2009-10: 10 year data tables. General practice series no. 28. Cat. no. GEP 28.  
54 Canberra: AIHW. [http://www.aihw.gov.au/publication-  
55 detail/?id=6442472440&tab=2](http://www.aihw.gov.au/publication-detail/?id=6442472440&tab=2) (accessed 17 July 2012). 2010.  
56  
57 127 Boyd CM, Darer J, Boulton C, *et al.* Clinical practice guidelines and quality of care  
58 for older patients with multiple comorbid diseases. *JAMA* 2005;294:716-24.  
59  
60 128 Kamerow D. How can we treat multiple chronic conditions? *BMJ*  
2012;344:e1487 doi: 10.136/bmj.e87
- 129 Richmond RL, Law J, Kay-Lambkin F. Physical, mental, and cognitive function  
in a convenience sample of centenarians in Australia. *J Am Geriatr Soc*  
2011;59:1080-86.

- 1  
2  
3 130 Wastesson JW, Parker MG, Fastbom J, *et al.* Drug use in centenarians  
4 compared with nonagenarians and octogenarians in Sweden: a nationwide  
5 register-based study. *Age and Ageing* 2012;41:218-24.  
6  
7 131 Watts G. Why the exclusion of older people from clinical research must stop.  
8 *BMJ* 2012;344:e3445.  
9  
10 132 Frada G, Bennati E, Cardillo E, *et al.* Pharmacotherapy in the extreme  
11 longevity. *Arch Gerontol Geriatr* 2009;49:60-63.  
12  
13 133 Campbell SM, Braspenning J, Hutchinson A, *et al.* Research methods used in  
14 developing and applying quality indicators in primary care. *Qual Saf Health*  
15 *Care* 2002;11:358-64.  
16  
17 134 Vitry AI, Zhang Y. Quality of Australian clinical guidelines and relevance to the  
18 care of older people with multiple comorbid conditions. *Med J Aust*  
19 2008;189:360-65.  
20  
21 135 Lee SJ, Walter LC. Quality indicators for older adults. Preventing unintended  
22 harms. *JAMA* 2011;306(13):1481-82.  
23  
24 136 Gilbert AL, Caughey GE, Vitry AI, *et al.* Ageing well: Improving the  
25 management of patients with multiple chronic health problems. *Australas J*  
26 *Ageing* 2011;30(S2):32-37.  
27  
28 137 Gnjdic D, Hilmer SN, Blyth FM, *et al.* High-risk prescribing and incidence of  
29 frailty among older community-dwelling men. *Clin Pharmacol Ther*  
30 2012;91(3):521-28.  
31  
32 138 Sirois C, Moisan J, Poirier P, *et al.* Association between age and the initiation of  
33 antihypertensive, lipid lowering and antiplatelet medications in elderly  
34 individuals newly treated with antidiabetic drugs. *Age Ageing* 2009;38:741-45.  
35  
36 139 Powers JH. Practice guidelines. Belief, criticism, and probability. *Arch Intern*  
37 *Med* 2011;171(1):15-16.  
38  
39  
40  
41  
42  
43  
44  
45  
46  
47  
48  
49  
50  
51  
52  
53  
54  
55  
56  
57  
58  
59  
60

STROBE 2007 (v4) Statement—Checklist of items that should be included in reports of *cohort studies*

| Section/Topic                | Item # | Recommendation                                                                                                                                                                       | Reported on page # |
|------------------------------|--------|--------------------------------------------------------------------------------------------------------------------------------------------------------------------------------------|--------------------|
| Title and abstract           | 1      | (a) Indicate the study's design with a commonly used term in the title or the abstract                                                                                               | 1                  |
|                              |        | (b) Provide in the abstract an informative and balanced summary of what was done and what was found                                                                                  | 1-2                |
| <b>Introduction</b>          |        |                                                                                                                                                                                      |                    |
| Background/rationale         | 2      | Explain the scientific background and rationale for the investigation being reported                                                                                                 | 2-3                |
| Objectives                   | 3      | State specific objectives, including any prespecified hypotheses                                                                                                                     | 3                  |
| <b>Methods</b>               |        |                                                                                                                                                                                      |                    |
| Study design                 | 4      | Present key elements of study design early in the paper                                                                                                                              | 3-4                |
| Setting                      | 5      | Describe the setting, locations, and relevant dates, including periods of recruitment, exposure, follow-up, and data collection                                                      | 4                  |
| Participants                 | 6      | (a) Give the eligibility criteria, and the sources and methods of selection of participants. Describe methods of follow-up                                                           | 3-4                |
|                              |        | (b) For matched studies, give matching criteria and number of exposed and unexposed                                                                                                  | N/A                |
| Variables                    | 7      | Clearly define all outcomes, exposures, predictors, potential confounders, and effect modifiers. Give diagnostic criteria, if applicable                                             | 4                  |
| Data sources/<br>measurement | 8*     | For each variable of interest, give sources of data and details of methods of assessment (measurement). Describe comparability of assessment methods if there is more than one group | 4                  |
| Bias                         | 9      | Describe any efforts to address potential sources of bias                                                                                                                            | 4                  |
| Study size                   | 10     | Explain how the study size was arrived at                                                                                                                                            | 4                  |
| Quantitative variables       | 11     | Explain how quantitative variables were handled in the analyses. If applicable, describe which groupings were chosen and why                                                         | 4                  |
| Statistical methods          | 12     | (a) Describe all statistical methods, including those used to control for confounding                                                                                                | 4                  |
|                              |        | (b) Describe any methods used to examine subgroups and interactions                                                                                                                  | N/A                |
|                              |        | (c) Explain how missing data were addressed                                                                                                                                          | N/A                |
|                              |        | (d) If applicable, explain how loss to follow-up was addressed                                                                                                                       | N/A                |
|                              |        | (e) Describe any sensitivity analyses                                                                                                                                                | N/A                |
| <b>Results</b>               |        |                                                                                                                                                                                      |                    |

|                          |     |                                                                                                                                                                                                              |       |
|--------------------------|-----|--------------------------------------------------------------------------------------------------------------------------------------------------------------------------------------------------------------|-------|
| Participants             | 13* | (a) Report numbers of individuals at each stage of study—eg numbers potentially eligible, examined for eligibility, confirmed eligible, included in the study, completing follow-up, and analysed            | 4     |
|                          |     | (b) Give reasons for non-participation at each stage                                                                                                                                                         | 4     |
|                          |     | (c) Consider use of a flow diagram                                                                                                                                                                           | N/A   |
| Descriptive data         | 14* | (a) Give characteristics of study participants (eg demographic, clinical, social) and information on exposures and potential confounders                                                                     | 4     |
|                          |     | (b) Indicate number of participants with missing data for each variable of interest                                                                                                                          | N/A   |
|                          |     | (c) Summarise follow-up time (eg, average and total amount)                                                                                                                                                  | 4     |
| Outcome data             | 15* | Report numbers of outcome events or summary measures over time                                                                                                                                               | 5     |
| Main results             | 16  | (a) Give unadjusted estimates and, if applicable, confounder-adjusted estimates and their precision (eg, 95% confidence interval). Make clear which confounders were adjusted for and why they were included | N/A   |
|                          |     | (b) Report category boundaries when continuous variables were categorized                                                                                                                                    | N/A   |
|                          |     | (c) If relevant, consider translating estimates of relative risk into absolute risk for a meaningful time period                                                                                             | N/A   |
| Other analyses           | 17  | Report other analyses done—eg analyses of subgroups and interactions, and sensitivity analyses                                                                                                               | 5-13  |
| <b>Discussion</b>        |     |                                                                                                                                                                                                              |       |
| Key results              | 18  | Summarise key results with reference to study objectives                                                                                                                                                     | 17-18 |
| <b>Limitations</b>       |     |                                                                                                                                                                                                              |       |
| Interpretation           | 20  | Give a cautious overall interpretation of results considering objectives, limitations, multiplicity of analyses, results from similar studies, and other relevant evidence                                   | 19    |
| Generalisability         | 21  | Discuss the generalisability (external validity) of the study results                                                                                                                                        | 18-19 |
| <b>Other information</b> |     |                                                                                                                                                                                                              |       |
| Funding                  | 22  | Give the source of funding and the role of the funders for the present study and, if applicable, for the original study on which the present article is based                                                | 20    |

\*Give information separately for cases and controls in case-control studies and, if applicable, for exposed and unexposed groups in cohort and cross-sectional studies.

**Note:** An Explanation and Elaboration article discusses each checklist item and gives methodological background and published examples of transparent reporting. The STROBE checklist is best used in conjunction with this article (freely available on the Web sites of PLoS Medicine at <http://www.plosmedicine.org/>, Annals of Internal Medicine at <http://www.annals.org/>, and Epidemiology at <http://www.epidem.com/>). Information on the STROBE Initiative is available at [www.strobe-statement.org](http://www.strobe-statement.org).
